# Supplementary material for: Physiological Responses and Proteomic Analysis on the Cold Stress Responses of Annual Pitaya (Hylocereus spp.) Branches
Source: Hindawi journal article supplement (doi:10.1155/2021/1416925), 2021-11-22
Supplement: f1 [file 1416925.f1.docx]

**Table S1**: List of identified proteins in the annual branches of XM, FL, and FHL.

| **Protein** | **Organism** | **ProteinName** | **GeneName** | **iBAQ** | **XM_1** | **XM_2** | **FL_1** | **FL_2** | **ZHL_1** | **ZHL_2** | **up-regulated** | **Mode** | **S|S(FL/XM)** | **S|S(ZHL/XM)** | **S|S(ZHL/FL)** | **Sig(FL/XM)** | **Sig(ZHL/XM)** | **Sig(ZHL/FL)** |
| --- | --- | --- | --- | --- | --- | --- | --- | --- | --- | --- | --- | --- | --- | --- | --- | --- | --- | --- |
| TR100003|c0_g5|m.25343 | Vitis vinifera | Putative uncharacterized protein | VIT_11s0052g00670 | 6044.8 | 54.16 | 135.5 | 62.686 | 59.954 | 187.34 | 56.149 | 0 | 0 | 0 | 0 | 0 | 0 | 0 | 0 |
| TR100013|c1_g10|m.50952 | Vitis vinifera | Putative uncharacterized protein | VIT_08s0058g00320 | 1148.5 |  |  |  |  |  |  | 0 | 0 | 0 | 0 | 0 | 0 | 0 | 0 |
| TR100013|c1_g2|m.14299 | Nicotiana tabacum | Ubiquitin activating enzyme 2 |  | 11614 | 48.566 | 60.035 | 191.45 | 142.73 |  | 296.25 | 1 | 1 | 1 | 1 | 0 | 1 | 1 | 0 |
| TR100013|c1_g5|m.44497 | Vitis vinifera | Putative uncharacterized protein | VIT_08s0058g00320 | 7148.4 | 158.77 | 109.69 | 14.333 |  | 45.158 | 116.45 | 0 | 0 | 0 | 0 | 0 | 0 | 0 | 0 |
| TR100013|c1_g8|m.25957 | Nicotiana tabacum | Ubiquitin activating enzyme 2 |  | 1066.9 | 63.852 |  |  |  |  |  | 0 | 0 | -1 | -1 | 0 | 0 | 0 | 0 |
| TR100014|c2_g5|m.42220 | Solanum tuberosum | Allene oxide synthase 2 | AOS2 | 7622.2 |  |  |  | 43.729 |  |  | 0 | 0 | 1 | 0 | -1 | 0 | 0 | 0 |
| TR100014|c2_g6|m.39204 | Passiflora edulis | Chloroplast allene oxide synthase |  | 2161 |  |  | 72.763 |  |  |  | 0 | 0 | 1 | 0 | -1 | 0 | 0 | 0 |
| TR100016|c0_g4|m.26821 | Ricinus communis | Aconitase, putative | RCOM_0487910 | 138590 | 1131 | 1617.9 | 1058.1 | 798.53 | 3227.3 | 2875.3 | 0 | 0 | 0 | 1 | 1 | 0 | 1 | 1 |
| TR100021|c0_g2|m.4916 | Vitis vinifera | Putative uncharacterized protein | VIT_11s0118g00720 | 238.99 | 14.025 |  | 21.559 | 11.431 |  |  | 0 | 0 | 0 | -1 | -1 | 0 | 0 | 0 |
| TR100275|c1_g2|m.21795 | Vitis vinifera | Putative uncharacterized protein | VIT_02s0025g01700 | 1914.6 |  |  |  |  | 233.02 | 238.31 | 0 | 0 | 0 | 1 | 1 | 0 | 0 | 0 |
| TR100282|c0_g13|m.59313 | Populus trichocarpa | Ribosomal protein L15 | POPTRDRAFT_709743 | 88926 | 35.008 | 367.18 | 767.05 | 1189.6 | 1130.1 | 2174.1 | 1 | 1 | 0 | 0 | 0 | 0 | 0 | 0 |
| TR100285|c0_g5|m.52780 | Oryza sativa | Proteasome subunit alpha type | Os11g0615700 | 73765 | 291.19 | 352.49 | 309.91 | 185.53 | 2892.6 | 1942.9 | 0 | 0 | 0 | 1 | 1 | 0 | 1 | 1 |
| TR100317|c0_g6|m.30609 | Oryza sativa | Proteasome subunit alpha type | Os11g0615700 | 285.22 |  |  |  |  |  |  | 0 | 0 | 0 | 0 | 0 | 0 | 0 | 0 |
| TR146227|c0_g9|m.19802 | Cucumis melo | Succinate dehydrogenase |  | 49832 | 205.87 | 364.61 | 233.75 | 211.58 | 1712.3 | 1464.1 | 0 | 0 | 0 | 1 | 1 | 0 | 1 | 1 |
| TR83852|c2_g3|m.11591 | Oryza sativa | Os05g0357600 protein | OJ1045_C06.7 | 4002 |  |  | 51.835 | 14.165 | 232.08 | 60.623 | 1 | 1 | 1 | 1 | 0 | 0 | 0 | 0 |
| TR129400|c0_g3|m.24022 | Ricinus communis | 26S protease regulatory subunit, putative | RCOM_1629040 | 961.12 |  |  |  |  | 205.9 |  | 0 | 0 | 0 | 1 | 1 | 0 | 0 | 0 |
| TR100336|c2_g1|m.15993 | Ricinus communis | Sugar transporter, putative | RCOM_1601940 | 6416.1 | 40.815 | 102.04 |  | 17.185 | 489.57 | 150.59 | 0 | 0 | 0 | 0 | 0 | 0 | 0 | 0 |
| TR41819|c0_g1|m.16357 | Ricinus communis | Methionine sulfoxide reductase, putative | RCOM_0816980 | 27461 | 160.77 | 181.36 | 457.64 | 386.59 | 374.52 | 807.84 | 1 | 1 | 1 | 0 | 0 | 1 | 0 | 0 |
| TR105523|c0_g1|m.2784 | Vitis vinifera | Putative uncharacterized protein | VIT_17s0000g03310 | 167320 | 2743.3 | 2910.7 | 1475.4 | 1228 | 3043.1 | 2996.6 | 0 | 0 | -1 | 0 | 1 | -1 | 0 | 1 |
| TR100349|c0_g1|m.58942 | Populus trichocarpa | Putative uncharacterized protein |  | 3242.7 | 171.92 |  | 55.657 | 59.116 |  |  | 0 | -1 | -1 | -1 | -1 | -1 | 0 | 0 |
| TR100353|c0_g4|m.34876 | Populus trichocarpa | Predicted protein | POPTRDRAFT_742621 | 1146.2 | 333.98 |  |  |  |  |  | 0 | 0 | -1 | -1 | 0 | 0 | 0 | 0 |
| TR100356|c2_g1|m.21272 | Elaeis guineensis | Putative controlled tumor protein |  | 38198 | 269.96 | 401.33 | 505.36 | 237.07 | 609.59 | 737.43 | 1 | 1 | 0 | 0 | 0 | 0 | 0 | 0 |
| TR100361|c1_g1|m.55238 | Populus trichocarpa | Putative uncharacterized protein |  | 8814.7 | 75.854 | 84.636 | 50.745 | 50.205 | 361.03 | 229.11 | 0 | 0 | -1 | 0 | 0 | -1 | 0 | 0 |
| TR100863|c0_g1|m.61546 | Vitis vinifera | Putative uncharacterized protein | VIT_02s0012g02530 | 22070 | 35.309 | 205.58 | 259.95 | 22.263 | 406.73 | 727.15 | 0 | 0 | 0 | 0 | 0 | 0 | 0 | 0 |
| TR55012|c0_g1|m.48958 | Vitis vinifera | Putative uncharacterized protein | VIT_06s0004g06640 | 6176.8 | 102.03 | 90.796 | 115.25 | 32.38 | 92.599 | 54.52 | 0 | 0 | 0 | 0 | 0 | 0 | 0 | 0 |
| TR100887|c0_g1|m.19407 | Vitis vinifera | Putative uncharacterized protein | VIT_16s0039g01860 | 455.69 |  |  |  |  |  |  | 0 | 0 | 0 | 0 | 0 | 0 | 0 | 0 |
| TR132382|c3_g1|m.42953 | Vitis vinifera | Putative uncharacterized protein | VIT_14s0006g01020 | 1751.7 | 67.8 |  | 41.54 |  |  |  | 0 | -1 | 0 | -1 | -1 | 0 | 0 | 0 |
| TR112688|c0_g2|m.53000 | Picea sitchensis | Putative uncharacterized protein |  | 55233 | 414.52 | 648.37 | 794.1 | 524.49 | 1395.7 | 2459.2 | 1 | 1 | 0 | 0 | 0 | 0 | 0 | 0 |
| TR100903|c0_g1|m.7910 | Vitis vinifera | Putative uncharacterized protein | VIT_18s0001g07100 | 3952.8 | 66.387 | 86.109 | 55.882 | 25.175 | 48.162 |  | 0 | 0 | 0 | 0 | 0 | 0 | 0 | 0 |
| TR100907|c1_g1|m.32560 | Oryza sativa | Putative uncharacterized protein | OsJ_18543 | 51151 | 148.45 | 217.62 | 59.51 | 231.07 | 1987.8 | 2484.2 | 0 | 0 | 0 | 1 | 1 | 0 | 1 | 1 |
| TR52007|c0_g2|m.13867 | Vitis vinifera | Putative uncharacterized protein | VIT_03s0038g02130 | 153460 |  | 2629.2 | 1108.2 | 1099.5 | 3173.6 | 2767.6 | 0 | 0 | -1 | 0 | 1 | -1 | 0 | 1 |
| TR117591|c0_g1|m.50980 | Glycine max | Uncharacterized protein |  | 20085 | 201.93 | 179.46 | 24.493 | 133.73 | 1137.5 | 944.56 | 0 | 0 | 0 | 1 | 1 | 0 | 1 | 1 |
| TR100949|c1_g1|m.47567 | Vitis vinifera | Putative uncharacterized protein | VIT_16s0098g00370 | 99.49 | 3.9921 |  | 2.751 |  | 7.8959 |  | 0 | 0 | 0 | 0 | 0 | 0 | 0 | 0 |
| TR100960|c0_g1|m.51634 | Ricinus communis | Pyruvate kinase | RCOM_0910580 | 3721.8 |  | 5.6914 | 2.3683 | 32.138 | 61.216 | 139.3 | 1 | 1 | 0 | 0 | 0 | 0 | 0 | 0 |
| TR100963|c0_g4|m.63102 | Vitis vinifera | Putative uncharacterized protein | VIT_18s0001g05630 | 1122 | 33.232 | 42.535 |  |  | 46.391 |  | 0 | 0 | -1 | 0 | 1 | 0 | 0 | 0 |
| TR40789|c0_g1|m.33466 | Vitis vinifera | Putative uncharacterized protein | VIT_01s0010g00680 | 1567.2 |  |  |  |  |  |  | 0 | 0 | 0 | 0 | 0 | 0 | 0 | 0 |
| TR100987|c2_g2|m.31364 | Vitis vinifera | Putative uncharacterized protein | VIT_01s0010g00680 | 8474.3 |  |  |  |  | 787.7 | 729.9 | 0 | 0 | 0 | 1 | 1 | 0 | 0 | 0 |
| TR100991|c0_g1|m.21354 | Populus trichocarpa | Predicted protein | POPTRDRAFT_779065 | 4925.9 | 31.411 | 16.899 | 15.916 | 47.47 | 507.82 | 36.878 | 1 | 1 | 0 | 0 | 0 | 0 | 0 | 0 |
| TR163919|c1_g1|m.30639 | Pyrus pyrifolia | Sucrose phosphate synthase | PpSPS1 | 2033.3 |  | 63.844 | 84.69 | 71.356 |  |  | 0 | 0 | 0 | -1 | -1 | 0 | 0 | 0 |
| TR100995|c0_g1|m.15498 | Vitis vinifera | Putative uncharacterized protein | VIT_08s0040g00610 | 90.99 |  | 3.4626 | 5.0015 |  |  |  | 0 | 0 | 0 | -1 | -1 | 0 | 0 | 0 |
| TR101009|c0_g4|m.40660 | Populus trichocarpa | Predicted protein | POPTRDRAFT_548443 | 16985 | 240.72 | 277.85 | 284.18 | 147.09 | 453.56 | 230.44 | 0 | 0 | 0 | 0 | 0 | 0 | 0 | 0 |
| TR101013|c0_g1|m.58914 | Silene latifolia | Chloroplast inner envelope protein (Fragment) |  | 35683 | 219.31 | 630.72 | 363.08 | 335.41 | 329.56 | 475.2 | 0 | 0 | 0 | 0 | 0 | 0 | 0 | 0 |
| TR101020|c0_g6|m.41239 | Vitis vinifera | Putative uncharacterized protein | VIT_04s0008g00770 | 1575.7 |  |  |  |  |  | 163.34 | 0 | 0 | 0 | 1 | 1 | 0 | 0 | 0 |
| TR99935|c1_g2|m.34879 | Populus trichocarpa | Predicted protein (Fragment) | POPTRDRAFT_256091 | 3659.3 | 8.3731 |  | 55.254 | 13.562 | 51.495 |  | 1 | 1 | 0 | 0 | 0 | 0 | 0 | 0 |
| TR36801|c0_g1|m.35118 | Ricinus communis | Ubiquitin carboxyl-terminal hydrolase, putative | RCOM_0423090 | 2425.2 | 178.96 | 142.92 | 39 |  |  |  | 0 | -1 | 0 | -1 | -1 | 0 | 0 | 0 |
| TR101027|c1_g5|m.40855 | Glycine max | NADPH--cytochrome P450 reductase | Gma.3957 | 166.07 |  |  |  |  |  |  | 0 | 0 | 0 | 0 | 0 | 0 | 0 | 0 |
| TR101033|c0_g6|m.60082 | Ricinus communis | Patellin-5, putative | RCOM_1332490 | 11006 | 143.84 | 175.55 | 251.27 | 153.83 | 155.42 | 89.733 | 0 | 0 | 0 | 0 | 0 | 0 | 0 | 0 |
| TR101042|c0_g3|m.24328 | Vitis vinifera | Putative uncharacterized protein | VITISV_002161 | 7893.7 |  |  |  |  | 301.97 | 282.29 | 0 | 0 | 0 | 1 | 1 | 0 | 0 | 0 |
| TR101050|c0_g2|m.40161 | Malus domestica | Delta-1-pyrroline-5-carboxylate dehydrogenase 1 protein | P5CDH1 | 6654.8 | 183.76 | 69.717 | 113.98 | 113.59 |  |  | 0 | 0 | 0 | -1 | -1 | 0 | 0 | 0 |
| TR89431|c0_g6|m.6530 | Malus domestica | Delta-1-pyrroline-5-carboxylate dehydrogenase protein | P5CDH | 3499.1 | 21.961 | 95 |  |  | 343.01 |  | 0 | 0 | -1 | 0 | 1 | 0 | 0 | 0 |
| TR101052|c0_g1|m.37033 | Cucumis sativus | Starch branching enzyme I |  | 11484 | 253.13 | 195.69 | 393.74 | 355.39 | 62.829 | 61.297 | 0 | 0 | 1 | -1 | -1 | 1 | -1 | -1 |
| TR101056|c1_g7|m.23823 | Ricinus communis | Zinc finger protein, putative | RCOM_0112080 | 2764.2 |  | 63.591 | 50.877 |  | 89.311 |  | 0 | 0 | 0 | 0 | 0 | 0 | 0 | 0 |
| TR101061|c0_g4|m.62725 | Vitis vinifera | Putative uncharacterized protein | VIT_03s0180g00020 | 2144.3 |  | 174.03 |  | 43.251 |  |  | 0 | -1 | 0 | -1 | -1 | 0 | 0 | 0 |
| TR130528|c2_g2|m.62321 | Glycine max | Uncharacterized protein | Gma.54362 | 679.17 | 67.246 |  | 50.57 |  |  |  | 0 | -1 | 0 | -1 | -1 | 0 | 0 | 0 |
| TR44607|c0_g1|m.48130 | Oryza sativa | Os05g0516600 protein | B1130G10.11 | 4052.3 |  |  | 56.583 | 49.531 | 81.84 |  | 1 | 1 | 1 | 1 | 0 | 0 | 0 | 0 |
| TR129561|c2_g12|m.60214 | Populus trichocarpa | Predicted protein (Fragment) | POPTRDRAFT_288825 | 24176 | 174.27 |  | 173.4 |  |  |  | 0 | -1 | 0 | -1 | -1 | 0 | 0 | 0 |
| TR33452|c1_g8|m.52807 | Schlumbergera virus X | Coat protein |  | 2416.4 |  |  |  |  |  |  | 0 | 0 | 0 | 0 | 0 | 0 | 0 | 0 |
| TR101180|c0_g3|m.20472 | Vitis vinifera | Putative uncharacterized protein | VIT_03s0091g01270 | 5226.9 |  | 295.78 | 157.99 |  |  | 485.61 | 0 | 0 | 0 | 0 | 0 | 0 | 0 | 0 |
| TR101181|c0_g3|m.52 | Ricinus communis | Plastid Tic40 |  | 5050.7 |  |  | 145.77 | 127.93 |  | 115.4 | 0 | 0 | 1 | 1 | 0 | 0 | 0 | 0 |
| TR101181|c0_g4|m.57800 | Ricinus communis | Putative uncharacterized protein | RCOM_0371600 | 4841.4 |  | 118.44 |  |  |  | 204.55 | 0 | 0 | -1 | 0 | 1 | 0 | 0 | 0 |
| TR101189|c1_g13|m.16100 | Gossypium hirsutum | Luminal binding protein |  | 137730 | 1581.8 | 2295.2 | 1478.9 | 797.88 | 2255.6 | 3215.2 | 0 | 0 | 0 | 0 | 0 | 0 | 0 | 0 |
| TR101189|c1_g2|m.9516 | Ricinus communis | Heat shock protein, putative | RCOM_1312280 | 186670 | 3302.2 | 2930.6 | 3212.6 | 2610.8 | 1158 | 2346.1 | 0 | -1 | 0 | 0 | 0 | 0 | 0 | 0 |
| TR101194|c2_g1|m.2678 | Ricinus communis | ATP synthase subunit d, putative | RCOM_1104310 | 233200 | 2257 | 2952.5 | 1526.9 | 1295.6 | 7280.9 | 5980.2 | 0 | 0 | 0 | 1 | 1 | 0 | 1 | 1 |
| TR101194|c3_g1|m.57820 | Ricinus communis | ATP synthase subunit d, putative | RCOM_1104310 | 13828 | 322.69 | 271.95 | 295.07 | 204.51 | 217.09 | 218.66 | 0 | -1 | 0 | 0 | 0 | 0 | 0 | 0 |
| TR101199|c0_g10|m.8772 | Carica papaya | Fructose-bisphosphate aldolase |  | 86577 | 1265.5 | 1100.1 | 883.4 | 564.52 | 442.3 | 2728.9 | 0 | 0 | 0 | 0 | 0 | 0 | 0 | 0 |
| TR101199|c0_g4|m.46535 | Hevea brasiliensis | Fructose-bisphosphate aldolase |  | 1915.2 |  |  |  |  |  |  | 0 | 0 | 0 | 0 | 0 | 0 | 0 | 0 |
| TR134939|c0_g5|m.44358 | Manihot esculenta | Fructose-bisphosphate aldolase (Fragment) |  | 14414 | 195.32 | 171.76 |  |  |  |  | 0 | 0 | -1 | -1 | 0 | 0 | 0 | 0 |
| TR101200|c1_g4|m.53708 | Vitis vinifera | Putative uncharacterized protein | VIT_18s0001g00290 | 4208.3 |  | 40.259 | 59.298 | 46.004 | 39.159 |  | 0 | 0 | 0 | 0 | 0 | 0 | 0 | 0 |
| TR101205|c1_g12|m.34945 | Populus trichocarpa | Predicted protein (Fragment) | POPTRDRAFT_874901 | 29630 | 443.69 | 412.63 | 213.34 | 146.76 | 518.48 | 1116.1 | 0 | 0 | -1 | 0 | 0 | -1 | 0 | 0 |
| TR157032|c2_g3|m.41026 | Ricinus communis | Putative uncharacterized protein | RCOM_0753100 | 17211 | 85.228 | 160.87 | 109.96 |  |  | 861.46 | 0 | 0 | 0 | 0 | 0 | 0 | 0 | 0 |
| TR155400|c1_g1|m.25900 | Medicago truncatula | ATPase family AAA domain-containing protein | MTR_5g020530 | 227.57 |  |  |  |  |  |  | 0 | 0 | 0 | 0 | 0 | 0 | 0 | 0 |
| TR109517|c0_g1|m.28428 | Ricinus communis | Endosomal P24A protein, putative | RCOM_0312330 | 137.63 |  |  |  | 26.163 |  |  | 0 | 0 | 1 | 0 | -1 | 0 | 0 | 0 |
| TR101218|c0_g6|m.26435 | Vitis vinifera | Putative uncharacterized protein | VIT_05s0020g04900 | 673.41 |  |  |  |  |  |  | 0 | 0 | 0 | 0 | 0 | 0 | 0 | 0 |
| TR101232|c0_g2|m.47987 | Ricinus communis | Calcium-dependent protein kinase, putative | RCOM_1577820 | 208.87 |  |  |  |  |  |  | 0 | 0 | 0 | 0 | 0 | 0 | 0 | 0 |
| TR101239|c12_g15|m.37203 | Ricinus communis | Elongation factor 1-alpha | RCOM_1101130 | 306550 | 2977.2 | 2701.9 | 3330.2 | 3104.6 | 9523.2 | 11727 | 1 | 1 | 0 | 1 | 1 | 0 | 1 | 1 |
| TR101239|c12_g7|m.23163 | Gossypium hirsutum | Elongation factor 1-alpha | EF1A3 | 25610 | 260.01 | 304.39 | 1205.5 | 395.66 | 924.54 | 899.09 | 1 | 1 | 0 | 1 | 0 | 0 | 1 | 0 |
| TR101239|c12_g8|m.40754 | Populus trichocarpa | Elongation factor 1-alpha | POPTRDRAFT_659836 | 158090 | 288.89 | 807.13 | 426.25 | 204.4 | 7863.9 | 7299.5 | 0 | 0 | 0 | 1 | 1 | 0 | 1 | 1 |
| TR82655|c0_g3|m.32774 | Vitis vinifera | Putative uncharacterized protein | VIT_05s0020g00750 | 233.76 |  |  |  |  | 51.601 |  | 0 | 0 | 0 | 1 | 1 | 0 | 0 | 0 |
| TR101248|c0_g1|m.16067 | Ricinus communis | Aspartate aminotransferase | RCOM_1052360 | 20325 | 47.742 | 48.572 | 31.732 | 223.51 | 849.43 | 2297.3 | 1 | 1 | 0 | 0 | 0 | 0 | 0 | 0 |
| TR101249|c0_g2|m.48564 | Populus trichocarpa | Predicted protein | POPTRDRAFT_1077146 | 4128.5 | 75.628 | 78.373 | 44.245 | 136.6 | 43.664 |  | 0 | 0 | 0 | -1 | 0 | 0 | -1 | 0 |
| TR101665|c0_g4|m.5815 | Glycine max | Uncharacterized protein | Gma.50706 | 11929 | 24.628 | 113.78 | 179.56 | 40.125 |  | 37.86 | 0 | 0 | 0 | 0 | 0 | 0 | 0 | 0 |
| TR101667|c0_g2|m.48003 | Populus trichocarpa x Populus deltoides | Peptide methionine sulfoxide reductase MsrA 2 | msrA2 | 11329 | 612.46 | 640.4 | 274.38 | 121.28 | 920.44 | 521.02 | 0 | 0 | -1 | 0 | 0 | -1 | 0 | 0 |
| TR101682|c2_g2|m.29761 | Vitis vinifera | Putative uncharacterized protein | VIT_11s0065g00450 | 217.18 |  |  |  |  |  |  | 0 | 0 | 0 | 0 | 0 | 0 | 0 | 0 |
| TR105392|c0_g5|m.47350 | Mesembryanthemum crystallinum | Porin | VDAC | 90940 | 956.54 | 1282.8 | 571.49 | 608.48 | 2354.2 | 1847.5 | 0 | 0 | 0 | 0 | 1 | 0 | 0 | 1 |
| TR144380|c0_g1|m.44991 | Medicago truncatula | Allene oxide cyclase (Precursor) | aoc | 17750 | 201.59 | 267.98 | 391.21 | 303.16 | 48.386 | 75.767 | 0 | 0 | 0 | -1 | -1 | 0 | -1 | -1 |
| TR101701|c1_g2|m.18521 | Nicotiana benthamiana | Malic enzyme (Fragment) | NADP-ME | 2677.1 | 302.87 | 29.037 | 28.588 | 25.887 |  | 221.94 | 0 | 0 | 0 | 0 | 1 | 0 | 0 | 1 |
| TR130414|c0_g6|m.5375 | Ricinus communis | Phosducin, putative | RCOM_1678550 | 1984.3 |  |  |  | 79.776 | 429.17 |  | 1 | 1 | 1 | 1 | 0 | 0 | 0 | 0 |
| TR101710|c1_g1|m.16907 | Vitis vinifera | Putative uncharacterized protein | VIT_05s0077g01060 | 1558.1 | 13.105 |  | 41.579 | 13.24 |  |  | 0 | 0 | 0 | -1 | -1 | 0 | 0 | 0 |
| TR139740|c0_g1|m.28323 | Ricinus communis | Adrenodoxin, putative | RCOM_0709560 | 53.299 |  |  |  |  |  |  | 0 | 0 | 0 | 0 | 0 | 0 | 0 | 0 |
| TR101718|c0_g4|m.61759 | Ricinus communis | Coatomer alpha subunit, putative | RCOM_1449180 | 6542.7 |  |  | 102.69 | 5.9834 | 490.21 | 274.24 | 1 | 1 | 1 | 1 | 0 | 0 | 0 | 0 |
| TR101726|c0_g1|m.34993 | Vitis vinifera | Putative uncharacterized protein | VIT_04s0008g07070 | 11511 | 98.211 | 202.85 | 141.64 | 105.74 | 339.55 | 146.91 | 0 | 0 | 0 | 0 | 0 | 0 | 0 | 0 |
| TR135403|c0_g1|m.15318 | Vitis vinifera | Putative uncharacterized protein | VIT_08s0007g02870 | 719.83 | 20.916 |  | 12.792 | 13.067 |  |  | 0 | -1 | -1 | -1 | -1 | -1 | 0 | 0 |
| TR101746|c0_g2|m.9839 | Ricinus communis | Putative uncharacterized protein | RCOM_1374130 | 1419.8 |  |  |  | 47.85 |  |  | 0 | 0 | 1 | 0 | -1 | 0 | 0 | 0 |
| TR135371|c0_g3|m.9133 | Ricinus communis | Calcium-dependent protein kinase, putative | RCOM_0685930 | 6379.3 | 12.922 | 56.409 | 188.76 | 110.88 | 60.869 | 81.092 | 0 | 0 | 0 | 0 | 0 | 0 | 0 | 0 |
| TR102080|c0_g1|m.16991 | Glycine max | Uncharacterized protein | Gma.32001 | 808.33 | 11.658 |  |  |  |  | 37.923 | 0 | 0 | -1 | 0 | 1 | 0 | 0 | 0 |
| TR117241|c0_g2|m.62361 | Vitis vinifera | Putative uncharacterized protein | VIT_08s0007g02960 | 506.2 |  |  |  |  | 54.656 |  | 0 | 0 | 0 | 1 | 1 | 0 | 0 | 0 |
| TR102106|c2_g4|m.40440 | Vitis vinifera | Putative uncharacterized protein | VIT_00s0283g00060 | 2443 |  |  |  |  |  |  | 0 | 0 | 0 | 0 | 0 | 0 | 0 | 0 |
| TR102107|c0_g1|m.21416 | Vitis vinifera | Putative uncharacterized protein | VIT_07s0129g00170 | 75288 | 1231.6 | 1539.7 | 593.49 | 530.11 | 1805.4 | 1919.1 | 0 | 0 | -1 | 0 | 1 | -1 | 0 | 1 |
| TR102134|c0_g2|m.46930 | Vitis vinifera | Putative uncharacterized protein | VIT_15s0046g02700 | 1617.6 | 31.988 | 21.382 | 14.488 |  |  |  | 0 | -1 | 0 | -1 | -1 | 0 | 0 | 0 |
| TR95456|c0_g1|m.11162 | Populus trichocarpa | Putative uncharacterized protein |  | 610.07 |  |  |  |  |  |  | 0 | 0 | 0 | 0 | 0 | 0 | 0 | 0 |
| TR57198|c0_g1|m.31453 | Populus trichocarpa | Predicted protein | POPTRDRAFT_551866 | 6461.6 | 9.6826 | 63.205 | 63.987 | 66.237 |  | 169.05 | 1 | 1 | 0 | 0 | 1 | 0 | 0 | 1 |
| TR102143|c1_g4|m.40629 | Bienertia sinuspersici | Chloroplast preprotein import receptor Toc34 |  | 4716.8 |  | 43.567 | 41.516 | 61.671 | 39.893 |  | 0 | 0 | 0 | 0 | 0 | 0 | 0 | 0 |
| TR102144|c0_g1|m.7721 | Gossypium hirsutum | Dihydrolipoyl dehydrogenase |  | 53932 | 704.57 | 580.85 | 360.92 | 562.55 | 934.54 | 928.55 | 0 | 0 | 0 | 0 | 1 | 0 | 0 | 1 |
| TR86370|c2_g1|m.21748 | Ricinus communis | Alcohol dehydrogenase, putative | RCOM_1315050 | 7276.9 | 123.1 | 60.375 | 90.177 | 44.194 |  | 379.41 | 0 | 0 | 0 | 0 | 0 | 0 | 0 | 0 |
| TR102159|c0_g3|m.47003 | Ricinus communis | Hydrolase, hydrolyzing O-glycosyl compounds, putative | RCOM_0611400 | 2090.5 | 128.33 | 49.494 | 15.161 | 21.303 |  |  | 0 | -1 | 0 | -1 | -1 | 0 | 0 | 0 |
| TR130137|c1_g2|m.1557 | Prunus salicina | Calcium ion binding protein |  | 1805.2 | 73.124 | 16.42 | 39.699 |  | 47.975 | 40.193 | 1 | 1 | 0 | 0 | 0 | 0 | 0 | 0 |
| TR117261|c3_g1|m.27094 | Lotus japonicus | Proteasome subunit beta type |  | 7458.1 | 95.963 |  |  | 41.059 |  | 405.79 | 0 | 0 | 0 | 0 | 0 | 0 | 0 | 0 |
| TR102173|c0_g2|m.12926 | Epidendrum stamfordianum | Phosphoenolpyruvate carboxylase (Fragment) | ppc | 4138500 | 19970 | 22247 | 12371 | 7564.7 | 180530 | 164040 | 0 | 0 | 0 | 1 | 1 | 0 | 1 | 1 |
| TR102177|c0_g1|m.20200 | Vitis vinifera | Acyl-coenzyme A oxidase | VITISV_000871 | 702.72 |  |  | 9.7433 | 15.453 |  |  | 0 | 0 | 1 | 0 | -1 | 0 | 0 | 0 |
| TR10243|c0_g1|m.14949 | Ricinus communis | 2-oxoglutarate dehydrogenase, putative | RCOM_0465620 | 21254 | 231.24 |  | 132.16 | 78.766 | 2261.1 |  | 0 | 0 | 0 | 0 | 1 | 0 | 0 | 1 |
| TR103126|c0_g2|m.29409 | Glycine max | Uncharacterized protein | Gma.19417 | 29035 | 170.85 | 163.76 | 71.393 | 130.15 | 946.38 | 868.21 | 0 | 0 | 0 | 1 | 1 | 0 | 1 | 1 |
| TR103136|c0_g1|m.41842 | Vitis vinifera | Putative uncharacterized protein | VIT_09s0002g04680 | 2249.6 | 59.671 |  | 67.278 |  |  |  | 0 | 0 | 0 | -1 | -1 | 0 | 0 | 0 |
| TR103137|c0_g1|m.36704 | Catharanthus roseus | Malate dehydrogenase |  | 39315 |  | 66.115 | 6.3879 |  | 1268.8 | 1856.5 | 0 | 0 | 0 | 0 | 0 | 0 | 0 | 0 |
| TR103154|c0_g3|m.22000 | Dianthus caryophyllus | Lipase (Fragment) |  | 37653 | 13.751 |  | 187.44 | 355.18 |  | 162.45 | 0 | 0 | 0 | 0 | 0 | 0 | 0 | 0 |
| TR128675|c150_g1|m.18381 | Vitis vinifera | Putative uncharacterized protein | VIT_15s0046g01470 | 7787.6 | 225.24 | 477.75 | 367.2 | 266.35 |  |  | 0 | -1 | 0 | -1 | -1 | 0 | 0 | 0 |
| TR103159|c1_g9|m.26737 | Populus trichocarpa | 60S ribosomal protein L13 | POPTRDRAFT_1096347 | 3132.4 | 11.336 |  | 30.37 |  | 86.957 |  | 1 | 1 | 0 | 0 | 0 | 0 | 0 | 0 |
| TR38934|c0_g1|m.55161 | Ricinus communis | Ferredoxin--NADP reductase | RCOM_1338000 | 5335.4 | 70.866 | 140.51 |  | 50.567 | 76.766 | 141.07 | 0 | 0 | 0 | 0 | 0 | 0 | 0 | 0 |
| TR103970|c1_g12|m.16758 | Populus trichocarpa | Predicted protein | POPTRDRAFT_570279 | 4388.7 |  |  | 27.931 | 113.54 | 178.04 | 207.65 | 1 | 1 | 1 | 1 | 0 | 0 | 0 | 0 |
| TR103970|c1_g16|m.15692 | Populus trichocarpa | Predicted protein | POPTRDRAFT_796714 | 228.79 | 42.018 | 42.772 |  | 43.714 |  |  | 0 | 0 | 0 | -1 | -1 | 0 | 0 | 0 |
| TR103970|c1_g3|m.9245 | Populus trichocarpa | Predicted protein | POPTRDRAFT_796714 | 11496 |  | 389.92 | 234.02 | 185.94 |  | 1078.1 | 0 | 0 | 0 | 0 | 1 | 0 | 0 | 1 |
| TR103970|c1_g19|m.14671 | Populus trichocarpa | Predicted protein | POPTRDRAFT_796714 | 86765 | 1164.9 | 1338.1 | 1029.3 | 741.37 | 997.62 | 1103.5 | 0 | 0 | 0 | 0 | 0 | 0 | 0 | 0 |
| TR103986|c86_g14|m.7648 | Zygocactus virus X | Coat protein |  | 17994 |  |  | 1015.9 |  |  |  | 0 | 0 | 1 | 0 | -1 | 0 | 0 | 0 |
| TR104009|c0_g2|m.16899 | Ricinus communis | 4-nitrophenylphosphatase, putative | RCOM_1077240 | 13869 | 244.8 | 323.76 | 92.09 | 8.6043 | 545.24 | 293.59 | 0 | 0 | 0 | 0 | 0 | 0 | 0 | 0 |
| TR135010|c0_g6|m.20399 | Ricinus communis | Copine, putative | RCOM_1188570 | 1130.7 |  |  |  |  |  |  | 0 | 0 | 0 | 0 | 0 | 0 | 0 | 0 |
| TR104040|c0_g1|m.58802 | Medicago truncatula | Peptidyl-prolyl cis-trans isomerase | MTR_7g110980 | 10003 | 83.261 | 20.593 |  | 15.021 | 710.06 | 383.01 | 0 | 0 | 0 | 0 | 0 | 0 | 0 | 0 |
| TR104041|c0_g11|m.14687 | Spinacia oleracea | Cysteine protease | SoCP3-41 | 40644 | 659.29 | 201.96 | 265.07 | 177.31 | 1073.3 | 1019.4 | 0 | 0 | 0 | 0 | 1 | 0 | 0 | 1 |
| TR104041|c0_g22|m.23273 | Ricinus communis | Cysteine protease, putative | RCOM_1589470 | 2377.8 |  | 42.042 | 55.64 | 12.338 |  | 99.388 | 0 | 0 | 0 | 0 | 0 | 0 | 0 | 0 |
| TR104047|c0_g2|m.32721 | Glycine max | Uncharacterized protein | Gma.35776 | 2128.8 |  |  | 20.91 |  |  | 387.79 | 1 | 1 | 1 | 1 | 0 | 0 | 0 | 0 |
| TR104048|c0_g1|m.22898 | Vitis vinifera | Putative uncharacterized protein | VIT_02s0025g02160 | 688.38 |  |  |  |  |  | 26.773 | 0 | 0 | 0 | 1 | 1 | 0 | 0 | 0 |
| TR104052|c1_g2|m.42526 | Vitis vinifera | Putative uncharacterized protein | VIT_04s0008g03680 | 2667.2 | 16.087 |  |  |  | 108.07 |  | 0 | 0 | -1 | 0 | 1 | 0 | 0 | 0 |
| TR104057|c1_g11|m.58564 | Glycine max | Uncharacterized protein | Gma.20493 | 1531.4 |  |  |  |  | 138.4 |  | 0 | 0 | 0 | 1 | 1 | 0 | 0 | 0 |
| TR163286|c1_g2|m.35822 | Silene latifolia | Aldose 1-epimerase family protein (Fragment) |  | 67.449 |  |  |  |  |  |  | 0 | 0 | 0 | 0 | 0 | 0 | 0 | 0 |
| TR27371|c2_g1|m.17856 | Populus trichocarpa | Predicted protein | POPTRDRAFT_746752 | 629.91 |  |  |  |  | 116 |  | 0 | 0 | 0 | 1 | 1 | 0 | 0 | 0 |
| TR98900|c0_g1|m.21586 | Vitis vinifera | Putative uncharacterized protein | VIT_10s0003g04030 | 701.79 | 17.81 |  |  |  |  |  | 0 | 0 | -1 | -1 | 0 | 0 | 0 | 0 |
| TR104157|c0_g5|m.4128 | Sorghum bicolor | Putative uncharacterized protein Sb07g021630 | Sb07g021630 | 16950 | 363.09 | 491.29 | 68.916 | 139.99 | 332.65 | 378.69 | 0 | 0 | -1 | 0 | 1 | -1 | 0 | 1 |
| TR104157|c0_g14|m.29864 | Vitis vinifera | Putative uncharacterized protein | VIT_11s0037g00070 | 31570 | 1473 | 1484.5 | 95.131 | 176.4 | 92.683 |  | 0 | -1 | -1 | -1 | 0 | -1 | -1 | 0 |
| TR104161|c0_g1|m.36839 | Spinacia oleracea | Pullulanase | PULSPO | 1828.8 | 97.988 | 69.992 | 72.051 | 79.563 |  | 48.35 | 0 | -1 | 0 | 0 | 0 | 0 | 0 | 0 |
| TR104161|c0_g1|m.36840 | Spinacia oleracea | Pullulanase | PULSPO | 5557.3 | 50.7 | 341.33 | 208.85 | 216.12 |  |  | 0 | 0 | 0 | -1 | -1 | 0 | 0 | 0 |
| TR152816|c0_g3|m.17067 | Ricinus communis | Glutathione-regulated potassium-efflux system protein kefB, putative | RCOM_1614600 | 5434.4 | 96.064 | 94.325 | 39.53 | 51.011 | 72.851 | 111.62 | 0 | 0 | -1 | 0 | 0 | -1 | 0 | 0 |
| TR104189|c0_g2|m.48310 | Vitis vinifera | Putative uncharacterized protein (Fragment) | VITISV_014207 | 23348 | 268.85 | 270.21 | 358.59 | 266.4 | 528.53 | 431.48 | 1 | 1 | 0 | 1 | 0 | 0 | 1 | 0 |
| TR104193|c1_g19|m.58140 |  |  |  | 1267.5 | 26.438 | 32.091 | 91.907 | 71.386 |  |  | 0 | 0 | 1 | -1 | -1 | 1 | 0 | 0 |
| TR104194|c0_g1|m.44942 | Vitis vinifera | Ubiquitin carboxyl-terminal hydrolase | VIT_09s0002g02500 | 3032.9 | 41.897 | 49.506 | 51.53 | 51.803 | 158.45 |  | 1 | 1 | 0 | 1 | 1 | 0 | 1 | 1 |
| TR104198|c0_g2|m.3154 | Populus trichocarpa | Phosphoribosylamine--glycine ligase | purD | 1339.9 |  |  |  |  |  |  | 0 | 0 | 0 | 0 | 0 | 0 | 0 | 0 |
| TR104199|c0_g4|m.22139 | Populus trichocarpa | Predicted protein | POPTRDRAFT_838390 | 757.1 |  | 8.5191 | 4.8549 | 26.103 | 44.453 |  | 1 | 1 | 0 | 0 | 0 | 0 | 0 | 0 |
| TR104200|c0_g1|m.44505 | Ricinus communis | Leucine zipper-ef-hand containing transmembrane protein, putative | RCOM_1076740 | 2940.1 | 5.7622 | 21.997 | 7.2027 | 27.915 | 70.264 |  | 1 | 1 | 0 | 0 | 0 | 0 | 0 | 0 |
| TR104211|c0_g5|m.30976 | Vitis vinifera | Putative uncharacterized protein | VIT_04s0008g01430 | 8814.1 | 30.994 | 74.427 | 253.37 | 63.977 | 343.45 | 163.66 | 1 | 1 | 0 | 0 | 0 | 0 | 0 | 0 |
| TR104213|c0_g3|m.43365 | Mangifera indica | Sucrose phosphate synthase | MiSPS1 | 15605 | 41.102 | 80.77 | 59.18 | 59.752 | 624.81 | 537.12 | 1 | 1 | 0 | 1 | 1 | 0 | 1 | 1 |
| TR148517|c0_g13|m.51525 | Silene latifolia | RNA recognition motif-containing protein (Fragment) |  | 1089.7 |  | 19.382 |  | 24.014 | 85.921 |  | 1 | 1 | 0 | 0 | 0 | 0 | 0 | 0 |
| TR104222|c2_g5|m.12585 | Vitis vinifera | Putative uncharacterized protein | VIT_02s0087g01020 | 4483.2 | 38.878 |  | 243.98 | 38.368 |  |  | 0 | 0 | 0 | -1 | -1 | 0 | 0 | 0 |
| TR104235|c0_g1|m.44005 | Vitis vinifera | Putative uncharacterized protein | VIT_07s0255g00120 | 1727.2 | 24.256 | 22.882 |  |  |  |  | 0 | 0 | -1 | -1 | 0 | 0 | 0 | 0 |
| TR95600|c0_g3|m.43853 | Ricinus communis | NMDA receptor-regulated protein, putative | RCOM_0894670 | 503.73 |  |  |  |  |  |  | 0 | 0 | 0 | 0 | 0 | 0 | 0 | 0 |
| TR104247|c1_g1|m.24770 | Vitis vinifera | Putative uncharacterized protein | VIT_19s0015g01380 | 884.99 |  |  |  | 17.095 |  | 27.495 | 1 | 1 | 1 | 1 | 0 | 0 | 0 | 0 |
| TR961|c0_g1|m.7206 | Camellia sinensis | Germin-like protein | GLP1 | 458920 | 3244.8 | 5344 | 1050.8 | 1762.3 | 7214.2 | 7159.1 | 0 | 0 | 0 | 0 | 1 | 0 | 0 | 1 |
| TR104895|c0_g12|m.32316 | Medicago truncatula | Uncharacterized protein |  | 175.84 |  |  |  |  |  |  | 0 | 0 | 0 | 0 | 0 | 0 | 0 | 0 |
| TR104903|c2_g2|m.49383 | Hevea brasiliensis | 60S ribosomal protein L12A | RPL12A | 134490 | 1347 | 1610.3 | 1217.3 | 912.72 | 4304.9 | 2835.7 | 0 | 0 | 0 | 0 | 0 | 0 | 0 | 0 |
| TR104903|c3_g1|m.10233 | Vitis vinifera | Putative uncharacterized protein | VIT_10s0042g00950 | 48835 | 886.73 | 463.61 | 605.5 | 839.46 | 711.19 | 679.63 | 0 | 0 | 0 | 0 | 0 | 0 | 0 | 0 |
| TR104918|c0_g1|m.32966 | Vitis vinifera | Putative uncharacterized protein | VIT_04s0079g00800 | 87307 | 721.02 | 1133.2 | 998.48 | 445.97 | 3224.9 | 2750 | 0 | 0 | 0 | 1 | 1 | 0 | 1 | 1 |
| TR104927|c0_g2|m.23739 | Camellia sinensis | Inosine-5'-monophosphate dehydrogenase | TIDH | 544.32 |  | 38.024 |  |  |  |  | 0 | 0 | -1 | -1 | 0 | 0 | 0 | 0 |
| TR104929|c0_g1|m.26670 | Glycine max | Uncharacterized protein | Gma.56662 | 20863 | 103.49 | 207.02 | 185.87 | 200.37 | 554.87 | 714.23 | 1 | 1 | 0 | 1 | 1 | 0 | 1 | 1 |
| TR104940|c0_g10|m.41487 | Vitis vinifera | Putative uncharacterized protein | VIT_00s0333g00040 | 746.23 |  |  |  |  |  |  | 0 | 0 | 0 | 0 | 0 | 0 | 0 | 0 |
| TR104942|c0_g11|m.44635 | Vitis vinifera | Putative uncharacterized protein | VIT_13s0067g00270 | 282500 | 2346.8 | 3676.6 | 1943.8 | 1385.4 | 9276.9 | 6550.1 | 0 | 0 | 0 | 0 | 1 | 0 | 0 | 1 |
| TR104954|c0_g1|m.15257 | Medicago truncatula | DEAD-box ATP-dependent RNA helicase | MTR_040s0046 | 2203.3 | 54.036 |  | 24.96 |  | 50.263 |  | 0 | 0 | 0 | 0 | 0 | 0 | 0 | 0 |
| TR145071|c2_g2|m.34399 | Maihuenia poeppigii | 30S ribosomal protein S4 (Fragment) | rps4 | 6327.7 |  |  | 165.43 | 144.64 |  | 825.07 | 1 | 1 | 1 | 1 | 1 | 0 | 0 | 1 |
| TR127977|c0_g2|m.46682 | Vitis vinifera | Putative uncharacterized protein | VIT_01s0011g02180 | 7733.8 | 170.52 | 248.6 | 155.86 | 47.722 | 76.45 | 55.9 | 0 | -1 | 0 | 0 | 0 | 0 | 0 | 0 |
| TR160665|c0_g1|m.28941 | Ricinus communis | Putative uncharacterized protein | RCOM_0290900 | 764.43 |  | 39.032 | 30.857 | 19.929 |  |  | 0 | -1 | 0 | -1 | -1 | 0 | 0 | 0 |
| TR104985|c0_g1|m.16886 | Capsicum annuum | RNA-binding protein RZ-1 | RZ-1 | 8294.9 | 307.42 | 176.86 | 126.15 | 110.21 |  |  | 0 | -1 | 0 | -1 | -1 | 0 | 0 | 0 |
| TR105145|c0_g11|m.51078 | Bienertia sinuspersici | Chloroplast preprotein import receptor Toc159 |  | 546.09 |  |  | 53.134 |  |  |  | 0 | 0 | 1 | 0 | -1 | 0 | 0 | 0 |
| TR105145|c0_g9|m.33661 | Bienertia sinuspersici | Chloroplast preprotein import receptor Toc159 |  | 1863.7 | 3.1062 | 7.5802 | 15.094 | 5.8709 | 46.195 | 39.266 | 1 | 1 | 0 | 1 | 1 | 0 | 1 | 1 |
| TR98552|c0_g3|m.7778 | Vitis vinifera | Putative uncharacterized protein | VIT_12s0035g01840 | 9503.7 | 134.98 | 80.446 | 77.721 | 55.053 | 256.04 | 302.03 | 0 | 0 | 0 | 1 | 1 | 0 | 1 | 1 |
| TR160476|c0_g2|m.30965 | Vitis vinifera | Putative uncharacterized protein | VIT_06s0004g00500 | 3847.2 |  | 16.936 | 10.926 | 1.0791 | 56.464 | 79.46 | 0 | 0 | 0 | 0 | 1 | 0 | 0 | 1 |
| TR105163|c0_g1|m.38473 | Vitis vinifera | Putative uncharacterized protein | VIT_19s0015g01380 | 168.56 | 5.707 |  |  |  |  |  | 0 | 0 | -1 | -1 | 0 | 0 | 0 | 0 |
| TR86097|c1_g2|m.22607 | Vitis vinifera | Putative uncharacterized protein | VIT_09s0002g07070 | 133.76 |  | 2.6103 | 12.872 |  |  |  | 0 | 0 | 0 | -1 | -1 | 0 | 0 | 0 |
| TR105187|c2_g2|m.366 | Ricinus communis | Xylem serine proteinase 1, putative | RCOM_1589810 | 46250 | 588.62 | 622.36 | 418.11 | 143.59 | 1081.3 | 1028.1 | 0 | 0 | 0 | 1 | 1 | 0 | 1 | 1 |
| TR158665|c0_g2|m.14630 | Vitis vinifera | Putative uncharacterized protein | VIT_13s0067g03000 | 1005.5 | 47.049 | 31.15 | 3.0049 |  | 30.761 | 36.562 | 0 | 0 | 0 | 0 | 0 | 0 | 0 | 0 |
| TR105209|c0_g2|m.33885 | Silene latifolia | Chloroplast inner envelope protein (Fragment) |  | 501.65 |  |  | 8.406 |  | 31.044 |  | 1 | 1 | 1 | 1 | 0 | 0 | 0 | 0 |
| TR50215|c1_g1|m.17798 | Ricinus communis | Serine/threonine-protein kinase PBS1, putative | RCOM_1343920 | 2388.8 | 63.794 |  | 32.142 |  |  | 18.264 | 0 | -1 | 0 | 0 | 0 | 0 | 0 | 0 |
| TR105212|c2_g4|m.46803 | Glycine max | Uncharacterized protein | Gma.20229 | 19948 |  | 233.96 | 80.936 |  | 527.87 | 349.2 | 0 | 0 | 0 | 0 | 0 | 0 | 0 | 0 |
| TR105228|c4_g1|m.45958 | Vitis vinifera | Putative uncharacterized protein | VIT_08s0007g07180 | 2111 | 50.124 | 17.878 | 38.726 |  | 178.31 |  | 1 | 1 | 0 | 0 | 0 | 0 | 0 | 0 |
| TR105228|c4_g8|m.2235 | Ricinus communis | Eukaryotic translation initiation factor 3 subunit, putative | RCOM_0036960 | 3772.5 |  |  | 36.07 |  | 279.68 | 386.83 | 1 | 1 | 1 | 1 | 0 | 0 | 0 | 0 |
| TR105230|c0_g1|m.27104 |  |  |  | 1225.8 | 8.1204 | 11.561 | 24.669 | 7.5506 |  |  | 0 | 0 | 0 | -1 | -1 | 0 | 0 | 0 |
| TR105231|c0_g3|m.31898 | Vitis vinifera | Putative uncharacterized protein | VIT_16s0100g00370 | 9070 |  |  |  |  | 254.27 |  | 0 | 0 | 0 | 1 | 1 | 0 | 0 | 0 |
| TR105231|c0_g4|m.4883 | Glycine max | Uncharacterized protein | Gma.16767 | 13651 | 128.39 | 133.33 | 163.28 | 130.75 | 286.76 |  | 1 | 1 | 0 | 1 | 0 | 0 | 1 | 0 |
| TR105235|c0_g1|m.8859 | Glycine max | Uncharacterized protein | Gma.13324 | 141380 | 2615.1 | 2388.2 | 820.64 | 940.12 | 2813.7 | 2489.9 | 0 | 0 | -1 | 0 | 1 | -1 | 0 | 1 |
| TR105239|c0_g14|m.13509 | Vitis vinifera | Putative uncharacterized protein | VIT_16s0013g01680 | 7184.2 |  |  |  |  |  |  | 0 | 0 | 0 | 0 | 0 | 0 | 0 | 0 |
| TR105328|c0_g2|m.20259 | Vitis vinifera | Putative uncharacterized protein | VIT_10s0003g05040 | 3644 | 55.544 |  |  |  | 327.3 | 254.33 | 0 | 0 | -1 | 0 | 1 | 0 | 0 | 0 |
| TR143734|c1_g3|m.8186 | Vitis vinifera | Putative uncharacterized protein | VIT_17s0000g06240 | 534.91 |  | 49.348 |  |  |  |  | 0 | 0 | -1 | -1 | 0 | 0 | 0 | 0 |
| TR45931|c0_g1|m.44329 | Vitis vinifera | Putative uncharacterized protein | VIT_19s0027g00210 | 912.26 | 18.222 | 21.526 |  |  |  |  | 0 | 0 | -1 | -1 | 0 | 0 | 0 | 0 |
| TR105358|c0_g2|m.41543 | Medicago truncatula | 26S proteasome non-ATPase regulatory subunit | MTR_1g016750 | 13409 |  |  | 25.407 | 127.85 | 591.98 | 842.14 | 1 | 1 | 1 | 1 | 1 | 0 | 0 | 1 |
| TR86579|c0_g1|m.59183 | Cucumis sativus | Somatic embryogenesis cinnamyl alcohol dehydrogenase 1 | SECAD1 | 71015 | 994.48 | 1081 | 809.63 | 760.06 | 2733.4 | 1026.1 | 0 | 0 | 0 | 0 | 0 | 0 | 0 | 0 |
| TR105373|c0_g1|m.28550 | Vitis vinifera | Putative uncharacterized protein | VIT_06s0004g03640 | 2692.9 |  | 54.963 | 33.316 | 43.101 | 124.77 |  | 0 | 0 | 0 | 0 | 0 | 0 | 0 | 0 |
| TR105383|c0_g1|m.22734 | Solanum chacoense | Rac-like GTP-binding protein | RAC1 | 3979.9 |  | 109.82 |  | 67.579 |  |  | 0 | -1 | 0 | -1 | -1 | 0 | 0 | 0 |
| TR105388|c1_g3|m.43507 | Ricinus communis | UDP-n-acteylglucosamine pyrophosphorylase, putative | RCOM_0561530 | 1970.5 |  | 8.9489 | 7.6438 | 9.0333 | 85.838 | 37.161 | 0 | 0 | 0 | 0 | 0 | 0 | 0 | 0 |
| TR105395|c0_g7|m.51653 | Arabidopsis lyrata | 40S ribosomal protein S11 | ARALYDRAFT_491674 | 8154 | 126.35 | 69.989 | 813.04 | 637.43 |  | 29.474 | 0 | 0 | 1 | 0 | 0 | 1 | 0 | 0 |
| TR105405|c0_g2|m.42355 | Ricinus communis | Electron transporter, putative | RCOM_1503210 | 4625.1 | 175.12 |  | 36.877 |  |  |  | 0 | -1 | 0 | -1 | -1 | 0 | 0 | 0 |
| TR105412|c0_g1|m.17944 | Populus trichocarpa | Predicted protein | POPTRDRAFT_1084600 | 19780 | 354.37 | 435.04 | 160.78 | 71.988 | 254.9 | 251.57 | 0 | 0 | -1 | 0 | 0 | -1 | 0 | 0 |
| TR105413|c0_g3|m.13611 | Vitis vinifera | Putative uncharacterized protein | VIT_11s0052g00500 | 2202.3 |  |  |  | 33.724 | 99.326 |  | 1 | 1 | 1 | 1 | 0 | 0 | 0 | 0 |
| TR105418|c0_g1|m.12576 | Morus alba | Urease accessory protein ureG | ureG | 44873 | 643.5 | 847.64 | 131.98 | 319.5 | 1253.4 | 928.51 | 0 | 0 | 0 | 0 | 1 | 0 | 0 | 1 |
| TR56159|c0_g1|m.29375 | Glycine max | Uncharacterized protein | Gma.16295 | 29606 | 620.01 | 479.06 | 231.45 | 257.99 | 1037.1 | 792.59 | 0 | 0 | 0 | 0 | 1 | 0 | 0 | 1 |
| TR105516|c1_g3|m.20455 | Gossypium hirsutum | Heat shock protein 70 |  | 53.333 |  |  |  |  |  |  | 0 | 0 | 0 | 0 | 0 | 0 | 0 | 0 |
| TR105516|c1_g4|m.41898 | Solanum lycopersicum | Heat shock protein 70 isoform 3 | hsc70.3 | 114710 | 1465.7 | 1615.3 | 731.94 | 652.73 | 3912.7 | 3817.7 | 0 | 0 | -1 | 1 | 1 | -1 | 1 | 1 |
| TR105516|c1_g6|m.30048 | Vitis vinifera | Putative uncharacterized protein | VIT_06s0004g04510 | 32571 | 650.84 | 801.53 | 770.13 | 653.9 | 439.11 | 454.46 | 0 | -1 | 0 | 0 | -1 | 0 | 0 | -1 |
| TR105516|c1_g7|m.20899 | Nicotiana tabacum | Heat shock protein 70-3 | HSP70-3 | 54299 | 807.95 | 876.19 | 728.6 | 702.49 | 1146.1 | 694.94 | 0 | 0 | 0 | 0 | 0 | 0 | 0 | 0 |
| TR164664|c0_g1|m.54052 | Populus trichocarpa | Predicted protein | POPTRDRAFT_827209 | 17401 | 24.584 | 65.29 | 134.16 | 100.92 | 668.33 | 167.77 | 1 | 1 | 0 | 0 | 0 | 0 | 0 | 0 |
| TR105540|c0_g1|m.27426 | Silene latifolia | GAMMA carbonic anhydrase (Fragment) |  | 58812 | 883.82 | 447.46 | 1052.1 | 871.98 | 784.79 | 294.67 | 0 | 0 | 0 | 0 | 0 | 0 | 0 | 0 |
| TR2507|c0_g6|m.52397 | Populus trichocarpa | Lipoxygenase | POPTRDRAFT_832809 | 10516 | 66.004 | 82.766 | 447.87 | 242.24 |  |  | 0 | 0 | 0 | -1 | -1 | 0 | 0 | 0 |
| TR117611|c0_g2|m.48291 | Glycine max | Uncharacterized protein |  | 5297.3 | 61.102 | 56.306 | 53.871 | 70.986 | 196.12 | 207.61 | 1 | 1 | 0 | 1 | 1 | 0 | 1 | 1 |
| TR47923|c2_g1|m.47484 | Populus trichocarpa | Putative uncharacterized protein |  | 211.22 |  |  | 30.662 | 20.952 |  |  | 0 | 0 | 1 | 0 | -1 | 0 | 0 | 0 |
| TR105560|c0_g5|m.44419 | Vitis vinifera | Putative uncharacterized protein | VIT_00s0370g00020 | 3778 | 131.46 | 161.9 | 66.536 | 92.693 |  |  | 0 | -1 | 0 | -1 | -1 | 0 | 0 | 0 |
| TR105562|c0_g1|m.24332 | Medicago truncatula | Peptidyl-prolyl cis-trans isomerase | MTR_3g115970 | 239.76 |  |  | 32.38 |  |  |  | 0 | 0 | 1 | 0 | -1 | 0 | 0 | 0 |
| TR112675|c0_g2|m.53532 | Portulacaria afra | ATP synthase subunit beta (Fragment) | atpB | 913540 | 12930 | 15010 | 9654.8 | 8185.5 | 24558 | 26072 | 0 | 0 | 0 | 1 | 1 | 0 | 1 | 1 |
| TR112675|c0_g2|m.53534 | Didierea madagascariensis | ATP synthase epsilon chain, chloroplastic (Fragment) | atpE | 24461 | 185.24 |  | 207.47 |  | 1173.1 | 934.21 | 1 | 1 | 0 | 0 | 0 | 0 | 0 | 0 |
| TR105590|c0_g2|m.15031 | Vitis vinifera | Putative uncharacterized protein | VIT_14s0006g02960 | 182.26 |  |  |  |  |  |  | 0 | 0 | 0 | 0 | 0 | 0 | 0 | 0 |
| TR69087|c2_g1|m.6859 | Lotus japonicus | Uncharacterized protein |  | 14812 | 150.16 | 284.05 | 319.57 | 264.52 | 206.74 | 192.27 | 0 | 0 | 0 | 0 | 0 | 0 | 0 | 0 |
| TR105865|c0_g7|m.8578 | Vitis vinifera | Putative uncharacterized protein | VIT_06s0004g03690 | 150.7 |  |  |  |  |  |  | 0 | 0 | 0 | 0 | 0 | 0 | 0 | 0 |
| TR69741|c0_g4|m.42984 | Cucumis melo | 40S ribosomal protein s2 |  | 180110 | 892.9 | 906.57 | 1767.8 | 1350.5 | 5883.9 | 6266.6 | 1 | 1 | 0 | 1 | 1 | 0 | 1 | 1 |
| TR49742|c0_g2|m.38082 | Vitis vinifera | Putative uncharacterized protein | VIT_13s0019g04480 | 97360 | 888.22 | 1220 | 626.61 | 615.29 | 2330.1 | 1621.1 | 0 | 0 | 0 | 0 | 0 | 0 | 0 | 0 |
| TR105885|c0_g1|m.62738 | Vitis vinifera | Putative uncharacterized protein | VIT_04s0008g02590 | 77875 | 987.8 | 1205.5 | 282.19 | 399.85 | 1440.4 | 1241.6 | 0 | 0 | -1 | 0 | 1 | -1 | 0 | 1 |
| TR51515|c1_g4|m.55760 | Glycine max | Uncharacterized protein | Gma.31098 | 69903 | 973 | 1582.7 | 645.2 | 281.68 | 1661.2 | 109.08 | 0 | -1 | 0 | 0 | 0 | 0 | 0 | 0 |
| TR51515|c1_g7|m.35839 | Ipomoea nil | Cysteine proteinase | In15 | 20469 | 1291 | 1411.4 |  |  |  |  | 0 | 0 | -1 | -1 | 0 | 0 | 0 | 0 |
| TR105910|c0_g1|m.58745 | Glycine max | Uncharacterized protein |  | 46257 | 771.35 | 737.32 | 1343.1 | 1026.5 | 325.71 | 310.05 | 0 | 0 | 0 | -1 | -1 | 0 | -1 | -1 |
| TR105914|c0_g3|m.20325 | Vitis vinifera | UDP-glucose 6-dehydrogenase | VIT_01s0011g00690 | 539.78 |  |  | 6.945 | 23.459 |  |  | 0 | 0 | 1 | 0 | -1 | 0 | 0 | 0 |
| TR105920|c1_g10|m.15221 |  |  |  | 61326 | 4270.4 | 4977.5 | 5385.4 | 98.279 | 196.58 | 221.09 | 0 | -1 | 0 | -1 | 0 | 0 | -1 | 0 |
| TR58522|c0_g2|m.392 | Glycine max | Uncharacterized protein |  | 21987 | 228.75 | 215.45 | 346.2 | 200.56 | 727.74 | 545.78 | 1 | 1 | 0 | 1 | 0 | 0 | 1 | 0 |
| TR105940|c1_g9|m.10536 | Malus hupehensis | Putative glycine-rich RNA-binding protein 1 | GR-RBP1 | 388140 | 3135.6 | 3642.1 | 3510.3 | 2367.4 | 15059 | 14941 | 0 | 0 | 0 | 1 | 1 | 0 | 1 | 1 |
| TR136765|c0_g2|m.42766 | Mesembryanthemum crystallinum | Triose phosphate/phosphate translocator | TPT | 15040 | 300.94 | 330.58 | 195.03 | 87.355 |  |  | 0 | -1 | 0 | -1 | -1 | 0 | 0 | 0 |
| TR99612|c2_g1|m.55900 | Ricinus communis | Nucleic acid binding protein, putative | RCOM_1507500 | 50.656 |  |  |  |  |  |  | 0 | 0 | 0 | 0 | 0 | 0 | 0 | 0 |
| TR106066|c0_g3|m.7414 | Vitis vinifera | Putative uncharacterized protein | VITISV_038955 | 2153.3 | 51.436 |  | 31.316 | 24.045 |  |  | 0 | -1 | 0 | -1 | -1 | 0 | 0 | 0 |
| TR106077|c0_g2|m.54767 | Zea mays | Aminomethyltransferase (Fragment) |  | 9704.2 |  | 86.885 | 41.385 | 34.706 | 482.84 | 456.03 | 0 | 0 | 0 | 1 | 1 | 0 | 1 | 1 |
| TR106096|c0_g1|m.22583 | Vitis vinifera | Putative uncharacterized protein | VIT_08s0058g00270 | 2886.6 | 4.3747 | 9.6584 |  |  | 134.61 | 77.087 | 0 | 0 | -1 | 0 | 1 | 0 | 0 | 0 |
| TR106103|c0_g4|m.22161 | Ricinus communis | Syntaxin, putative | RCOM_1616160 | 5095.6 |  |  | 136 | 226.63 |  |  | 0 | 0 | 1 | 0 | -1 | 0 | 0 | 0 |
| TR89811|c0_g1|m.2380 | Arabidopsis lyrata | C2 domain-containing protein | ARALYDRAFT_486240 | 2333.4 | 59.158 |  | 64.624 |  |  | 181.64 | 1 | 1 | 0 | 0 | 0 | 0 | 0 | 0 |
| TR106134|c0_g1|m.9330 | Vitis vinifera | Putative uncharacterized protein | VIT_11s0016g04970 | 48190 | 712.5 | 951.43 | 443.19 | 419.12 | 1141.4 | 730.38 | 0 | 0 | 0 | 0 | 0 | 0 | 0 | 0 |
| TR106137|c0_g2|m.40305 | Spinacia oleracea | Enolase | eno | 94001 |  |  |  |  | 8459 | 5151.1 | 0 | 0 | 0 | 1 | 1 | 0 | 0 | 0 |
| TR106137|c0_g4|m.55384 | Spinacia oleracea | Enolase | eno | 3288100 | 28068 | 34236 | 10152 | 15685 | 119250 | 124310 | 0 | 0 | -1 | 1 | 1 | -1 | 1 | 1 |
| TR106226|c0_g4|m.4020 | Beta vulgaris | Matrix attachment region binding protein | marb | 9247.5 |  |  | 4.4069 | 50.634 | 968.89 | 411.8 | 1 | 1 | 1 | 1 | 0 | 0 | 0 | 0 |
| TR106236|c0_g1|m.54194 | Vitis vinifera | Putative uncharacterized protein | VIT_01s0011g00230 | 999.69 |  |  |  |  |  |  | 0 | 0 | 0 | 0 | 0 | 0 | 0 | 0 |
| TR136588|c2_g1|m.50450 | Populus trichocarpa | Predicted protein | POPTRDRAFT_822264 | 13478 | 291.91 | 535.31 | 114.38 | 298.28 | 124.88 | 171.28 | 0 | -1 | 0 | 0 | 0 | 0 | 0 | 0 |
| TR106245|c0_g2|m.12382 | Citrus sinensis | Pyruvate decarboxylase |  | 30098 | 290.38 | 451.89 | 315.57 | 206.97 | 432.68 | 336.78 | 0 | 0 | 0 | 0 | 0 | 0 | 0 | 0 |
| TR148801|c1_g4|m.6851 | Populus trichocarpa | Predicted protein | POPTRDRAFT_1092225 | 7554.6 | 130.22 | 28.402 | 123.89 | 94.472 |  |  | 0 | 0 | 0 | -1 | -1 | 0 | 0 | 0 |
| TR137192|c0_g2|m.63121 | Populus trichocarpa | Predicted protein | POPTRDRAFT_766957 | 1717.9 | 15.045 |  | 4.8022 |  |  |  | 0 | -1 | 0 | -1 | -1 | 0 | 0 | 0 |
| TR111931|c1_g14|m.63161 | Glycine max | Uncharacterized protein | Gma.58591 | 963.75 |  |  |  |  |  |  | 0 | 0 | 0 | 0 | 0 | 0 | 0 | 0 |
| TR106264|c0_g7|m.29360 | Ricinus communis | Preprotein translocase secy subunit, putative | RCOM_1251830 | 760.84 | 65.023 | 59.751 | 50.964 |  |  |  | 0 | -1 | 0 | -1 | -1 | 0 | 0 | 0 |
| TR106267|c0_g1|m.42641 | Vitis vinifera | Putative uncharacterized protein | VIT_07s0031g00980 | 5847.1 | 82.691 | 82.369 | 22.092 | 50.451 | 126.42 |  | 0 | 0 | 0 | 1 | 0 | 0 | 1 | 0 |
| TR106270|c0_g1|m.40611 | Populus trichocarpa | Predicted protein | POPTRDRAFT_815164 | 2715.1 | 39.61 |  |  | 60.93 |  | 166.72 | 1 | 1 | 0 | 0 | 0 | 0 | 0 | 0 |
| TR106272|c0_g4|m.17727 | Vitis vinifera | Putative uncharacterized protein | VIT_11s0016g02680 | 20881 | 141.77 | 124.98 | 192.71 | 107.12 | 1121.7 | 952.13 | 1 | 1 | 0 | 1 | 1 | 0 | 1 | 1 |
| TR106276|c0_g11|m.42535 | Arabidopsis lyrata | GAPC-2 | ARALYDRAFT_471499 | 2103600 | 24228 | 27472 | 13979 | 10126 | 61036 | 64933 | 0 | 0 | -1 | 1 | 1 | -1 | 1 | 1 |
| TR106276|c0_g16|m.1051 | Pyrus x bretschneideri | Glyceraldehyde-3-phosphate dehydrogenase C1 | GDPHc1 | 1482300 | 12640 | 16291 | 8667.5 | 5334.4 | 30880 | 54563 | 0 | 0 | 0 | 0 | 0 | 0 | 0 | 0 |
| TR106276|c0_g8|m.11893 | Lotus japonicus | Uncharacterized protein |  | 2198200 | 22299 | 25297 | 11701 | 8473.2 | 83695 | 54665 | 0 | 0 | -1 | 0 | 0 | -1 | 0 | 0 |
| TR106286|c0_g1|m.42425 | Vitis vinifera | Putative uncharacterized protein | VIT_19s0014g03140 | 5797.1 | 24.448 | 62.087 | 46.943 | 30.121 | 339.35 | 132.39 | 0 | 0 | 0 | 0 | 0 | 0 | 0 | 0 |
| TR149798|c0_g2|m.62151 | Vitis vinifera | Putative uncharacterized protein | VIT_07s0031g02560 | 10418 | 145.65 | 165.51 | 124.18 | 127.32 | 207.9 | 215.12 | 0 | 0 | 0 | 0 | 1 | 0 | 0 | 1 |
| TR106305|c0_g1|m.54256 | Vitis vinifera | Putative uncharacterized protein | VIT_11s0103g00120 | 1591.6 |  |  |  |  | 160.12 | 21.783 | 0 | 0 | 0 | 1 | 1 | 0 | 0 | 0 |
| TR159727|c1_g2|m.11684 | Glycine max | Uncharacterized protein | Gma.11285 | 9370.7 | 75.265 | 82.537 | 128.19 | 104 | 522.67 | 465.81 | 1 | 1 | 0 | 1 | 1 | 0 | 1 | 1 |
| TR106618|c0_g1|m.5943 | Arabidopsis lyrata | Ubiquitin-conjugating enzyme 10 | UBC10 | 155180 |  | 1163.4 | 1033.6 | 181.01 | 2631 | 396.01 | 0 | 0 | 0 | 0 | 0 | 0 | 0 | 0 |
| TR107362|c0_g3|m.10987 | Populus trichocarpa | Predicted protein (Fragment) | POPTRDRAFT_846793 | 5807.1 |  | 118.31 |  | 23.853 |  |  | 0 | -1 | 0 | -1 | -1 | 0 | 0 | 0 |
| TR107362|c0_g5|m.51175 | Ricinus communis | Methylmalonate-semialdehyde dehydrogenase, putative | RCOM_0818850 | 11222 |  | 811.93 |  |  |  | 1002 | 0 | 0 | -1 | 0 | 1 | 0 | 0 | 0 |
| TR107365|c0_g3|m.23372 | Vitis vinifera | Putative uncharacterized protein | VIT_02s0025g04050 | 8175.4 | 74.83 | 86.666 | 21.999 | 29.327 | 387.55 | 311.5 | 0 | 0 | -1 | 1 | 1 | -1 | 1 | 1 |
| TR107375|c1_g3|m.9103 | Vitis vinifera | Putative uncharacterized protein | VIT_06s0009g03810 | 41.787 |  |  | 10.665 | 9.6703 |  |  | 0 | 0 | 1 | 0 | -1 | 0 | 0 | 0 |
| TR107378|c0_g4|m.43235 | Lotus japonicus | Uncharacterized protein |  | 1208.2 | 16.722 | 82.739 | 123.24 | 107.1 |  |  | 0 | 0 | 0 | -1 | -1 | 0 | 0 | 0 |
| TR135943|c0_g2|m.35235 | Beta vulgaris | Suppressor of gene silencing 3 |  | 1178.9 |  | 17.359 |  | 8.2135 |  | 34.792 | 0 | 0 | 0 | 0 | 0 | 0 | 0 | 0 |
| TR107381|c0_g3|m.5979 | Paulownia sp. ZKC-2008 | UDP-glucose pyrophosphorylase | ugp | 143270 | 2451.8 | 2869.8 | 1014.1 | 811.93 | 4059.8 | 3748 | 0 | 0 | -1 | 0 | 1 | -1 | 0 | 1 |
| TR107381|c0_g5|m.59811 | Solanum tuberosum | UTP:alpha-D-glucose-1-phosphate uridylyltransferase |  | 51742 | 987.55 | 1102 | 738.21 | 347.5 | 1290.2 | 1729 | 0 | 0 | 0 | 0 | 0 | 0 | 0 | 0 |
| TR107408|c0_g1|m.9395 | Pisum sativum | Starch branching enzyme I (Precursor) | SBEI | 29539 | 466.62 | 648.04 | 475.34 | 449.19 | 812.77 | 927.85 | 0 | 0 | 0 | 0 | 1 | 0 | 0 | 1 |
| TR164527|c0_g5|m.55086 | Suaeda salsa | Tyrosine phosphorylated protein A | TypA | 1443.9 |  | 20.15 |  | 11.429 | 128.4 | 119.33 | 0 | 0 | 0 | 1 | 1 | 0 | 1 | 1 |
| TR107425|c0_g3|m.57458 | Mesembryanthemum crystallinum | Ca2+-dependent protein kinase | CPK1 | 655.11 |  | 23.312 | 53.81 | 14.104 |  |  | 0 | 0 | 0 | -1 | -1 | 0 | 0 | 0 |
| TR129599|c1_g2|m.11140 | Silene latifolia | Molybdopterin adenylyltransferase (Fragment) |  | 1504.5 | 12.432 | 16.376 | 7.3465 | 23.692 | 84.445 |  | 0 | 0 | 0 | 1 | 0 | 0 | 1 | 0 |
| TR107431|c1_g4|m.51421 | Populus trichocarpa | Predicted protein | POPTRDRAFT_558749 | 337160 | 3207 | 3375.6 | 2182.8 | 1577.2 | 10195 | 11505 | 0 | 0 | -1 | 1 | 1 | -1 | 1 | 1 |
| TR107438|c1_g4|m.51417 | Ricinus communis | Spliceosome associated protein, putative | RCOM_1647480 | 1293.3 |  | 51.965 |  |  |  |  | 0 | 0 | -1 | -1 | 0 | 0 | 0 | 0 |
| TR107439|c0_g4|m.51144 | Vitis vinifera | Putative uncharacterized protein | VIT_08s0007g05090 | 559.84 |  |  | 10.716 | 13.571 |  | 52.322 | 1 | 1 | 1 | 1 | 1 | 0 | 0 | 1 |
| TR155812|c0_g2|m.47582 | Ricinus communis | Putative uncharacterized protein | RCOM_0643760 | 1607.8 | 51.717 | 53.959 | 52.138 | 40.229 |  |  | 0 | -1 | 0 | -1 | -1 | 0 | 0 | 0 |
| TR107456|c0_g1|m.20936 | Vitis vinifera | Putative uncharacterized protein | VIT_05s0077g00950 | 18132 | 330.78 | 246.23 | 410.57 | 370.34 | 664.49 | 499.01 | 1 | 1 | 0 | 0 | 0 | 0 | 0 | 0 |
| TR111935|c0_g2|m.55169 | Glycine max | Uncharacterized protein | Gma.31967 | 142.8 |  | 109.01 |  |  |  |  | 0 | 0 | -1 | -1 | 0 | 0 | 0 | 0 |
| TR108459|c1_g4|m.22855 | Glycine max | Uncharacterized protein | Gma.10759 | 2434.9 | 29.797 | 14.358 | 86.643 | 87.183 |  |  | 0 | 0 | 1 | -1 | -1 | 1 | 0 | 0 |
| TR129962|c0_g6|m.51154 | Vitis vinifera | Putative uncharacterized protein | VIT_02s0025g01410 | 12949 | 590.59 | 517.8 |  | 208.97 |  |  | 0 | -1 | 0 | -1 | -1 | 0 | 0 | 0 |
| TR81444|c0_g3|m.46278 | Glycine max | Mitochondrial pyruvate dehydrogenase kinase isoform 1 | Gma.3204 | 5635.6 |  |  |  |  | 361.75 | 253.71 | 0 | 0 | 0 | 1 | 1 | 0 | 0 | 0 |
| TR108462|c3_g7|m.47868 | Glycine max | Uncharacterized protein | Gma.48105 | 2657.9 | 90.727 |  | 22.259 | 15.033 | 157.4 | 191.15 | 0 | 0 | 0 | 0 | 1 | 0 | 0 | 1 |
| TR108482|c0_g1|m.63183 | Vitis vinifera | Putative uncharacterized protein | VIT_17s0000g09700 | 190660 | 1134.9 | 1497.4 | 303.25 | 233.03 | 1286.1 | 1005.2 | 0 | 0 | -1 | 0 | 1 | -1 | 0 | 1 |
| TR145110|c0_g1|m.22162 | Vitis vinifera | Putative uncharacterized protein | VIT_17s0000g02550 | 385.76 |  | 55.143 |  | 44.013 |  |  | 0 | -1 | 0 | -1 | -1 | 0 | 0 | 0 |
| TR108485|c0_g1|m.49425 | Ricinus communis | Paramyosin, putative | RCOM_1590690 | 261.34 | 11.746 | 22.314 | 16.743 | 25.339 |  |  | 0 | 0 | 0 | -1 | -1 | 0 | 0 | 0 |
| TR157066|c0_g1|m.57452 | Citrus clementina | Carotenoid cleavage dioxygenase 4a | CCD4a | 257.66 |  |  |  |  |  |  | 0 | 0 | 0 | 0 | 0 | 0 | 0 | 0 |
| TR135332|c0_g1|m.2290 | Populus trichocarpa | Predicted protein | POPTRDRAFT_785828 | 91723 | 1199 | 1431.4 | 457.29 | 340.26 | 2373.5 | 2351.4 | 0 | 0 | -1 | 1 | 1 | -1 | 1 | 1 |
| TR108496|c0_g1|m.23851 | Glycine max | Uncharacterized protein | Gma.37313 | 1094.8 | 14.618 | 16.562 |  |  |  |  | 0 | 0 | -1 | -1 | 0 | 0 | 0 | 0 |
| TR108508|c0_g1|m.59851 | Ricinus communis | Protein regulator of cytokinesis, putative | RCOM_0546860 | 312.77 |  |  |  |  |  |  | 0 | 0 | 0 | 0 | 0 | 0 | 0 | 0 |
| TR108520|c0_g1|m.20885 | Populus trichocarpa | Predicted protein (Fragment) | POPTRDRAFT_219726 | 1591 | 36.499 |  | 23.098 |  | 78.575 | 70.425 | 0 | 0 | 0 | 0 | 0 | 0 | 0 | 0 |
| TR108522|c145_g11|m.49681 | Schlumbergera virus X | Coat protein |  | 1362400 | 9030.5 | 6615.8 | 595.1 | 497.08 | 191.46 | 48.491 | 0 | -1 | -1 | -1 | -1 | -1 | -1 | -1 |
| TR108531|c1_g3|m.57677 | Vitis vinifera | Putative uncharacterized protein | VIT_03s0063g02560 | 9326.4 |  |  |  |  |  | 136.13 | 0 | 0 | 0 | 1 | 1 | 0 | 0 | 0 |
| TR133530|c1_g1|m.16450 | Ricinus communis | Vesicle transport V-snare protein vti1a, putative | RCOM_0537940 | 5948.9 | 80.671 | 34.185 | 212.1 | 85.935 |  | 537.17 | 1 | 1 | 0 | 0 | 0 | 0 | 0 | 0 |
| TR108545|c0_g10|m.35473 | Ricinus communis | Dihydrolipoamide succinyltransferase component of 2-oxoglutarate dehydrogenase, putative | RCOM_1303600 | 13854 | 119.74 | 146.58 | 444.23 | 108.02 | 481.11 | 409.22 | 1 | 1 | 0 | 1 | 0 | 0 | 1 | 0 |
| TR16090|c0_g1|m.52651 | Vitis vinifera | Putative uncharacterized protein | VIT_10s0116g01480 | 17818 | 161.64 | 404.22 | 162.81 | 126.91 | 464.48 | 178.55 | 0 | 0 | 0 | 0 | 0 | 0 | 0 | 0 |
| TR14464|c0_g2|m.23205 | Glycine max | Uncharacterized protein | Gma.41481 | 654.56 |  |  | 52.463 | 43.929 |  |  | 0 | 0 | 1 | 0 | -1 | 0 | 0 | 0 |
| TR84888|c0_g18|m.19070 | Populus trichocarpa | Superoxide dismutase (Fragment) | POPTRDRAFT_253123 | 6842.8 |  |  |  |  |  |  | 0 | 0 | 0 | 0 | 0 | 0 | 0 | 0 |
| TR109471|c3_g9|m.31980 | Vitis vinifera | Putative uncharacterized protein | VIT_01s0026g01770 | 6998 |  | 257.73 |  |  |  |  | 0 | 0 | -1 | -1 | 0 | 0 | 0 | 0 |
| TR109479|c0_g2|m.28689 | Vitis vinifera | Thioredoxin reductase | VIT_08s0007g08760 | 5958.4 | 64.599 | 116.52 | 111.22 | 41.556 |  | 191.61 | 0 | 0 | 0 | 0 | 0 | 0 | 0 | 0 |
| TR109489|c0_g2|m.52736 | Ricinus communis | Protein phosphatase-5, putative | RCOM_1195150 | 1353.3 |  |  |  |  |  | 88.761 | 0 | 0 | 0 | 1 | 1 | 0 | 0 | 0 |
| TR163952|c2_g3|m.11000 | Glycine max | Uncharacterized protein | Gma.8652 | 2494.4 | 65.325 | 53.842 | 61.388 | 36.509 |  |  | 0 | -1 | 0 | -1 | -1 | 0 | 0 | 0 |
| TR109498|c0_g1|m.26555 | Vitis vinifera | Putative uncharacterized protein | VITISV_008875 | 12859 | 302.01 | 244.18 | 140 | 195.52 | 92.128 | 140.53 | 0 | -1 | 0 | 0 | 0 | 0 | 0 | 0 |
| TR109498|c0_g3|m.29139 | Glycine max | Uncharacterized protein |  | 12712 | 145.84 |  | 88.902 | 10.869 | 83.4 | 58.319 | 0 | 0 | 0 | 0 | 0 | 0 | 0 | 0 |
| TR109506|c0_g1|m.50955 | Vitis vinifera | Putative uncharacterized protein | VIT_01s0011g00540 | 1175.6 |  | 29.661 |  |  |  |  | 0 | 0 | -1 | -1 | 0 | 0 | 0 | 0 |
| TR109507|c0_g1|m.47411 | Vitis vinifera | Putative uncharacterized protein | VIT_06s0004g07450 | 13988 |  |  |  |  | 306.95 |  | 0 | 0 | 0 | 1 | 1 | 0 | 0 | 0 |
| TR109508|c0_g5|m.11478 | Arabidopsis lyrata | Triosephosphate isomerase | ARALYDRAFT_900526 | 16662 | 272.02 | 402.32 | 242.95 | 216.78 | 529.25 | 473.33 | 0 | 0 | 0 | 0 | 1 | 0 | 0 | 1 |
| TR109508|c0_g8|m.52327 | Ricinus communis | Triosephosphate isomerase | RCOM_0660930 | 443960 | 8126.4 | 9588.9 | 3496.7 | 2598 | 14405 | 9168.5 | 0 | 0 | -1 | 0 | 0 | -1 | 0 | 0 |
| TR109509|c1_g2|m.17142 | Vitis vinifera | Pyruvate kinase | VIT_10s0071g01060 | 160380 | 1728.1 | 3770.3 | 1627.6 | 1504.6 | 2816.6 | 2139.4 | 0 | 0 | 0 | 0 | 0 | 0 | 0 | 0 |
| TR109509|c1_g4|m.8992 | Glycine max | Pyruvate kinase |  | 24004 | 420.32 | 456.44 | 483.24 | 396.31 | 502.49 | 414.45 | 0 | 0 | 0 | 0 | 0 | 0 | 0 | 0 |
| TR109520|c0_g4|m.23026 | Glycine max | Uncharacterized protein | Gma.19283 | 2372.3 | 27.151 | 145.25 | 99.474 | 88.544 | 23.666 |  | 0 | 0 | 0 | 0 | 0 | 0 | 0 | 0 |
| TR109521|c0_g2|m.22511 | Glycine max | Uncharacterized protein | Gma.19324 | 6787.6 | 81.119 | 135.33 | 102.49 | 78.644 | 124.01 | 22.884 | 0 | -1 | 0 | 0 | 0 | 0 | 0 | 0 |
| TR109538|c0_g1|m.22586 | Populus trichocarpa | Predicted protein | POPTRDRAFT_836871 | 1138.6 |  |  | 86.106 |  |  |  | 0 | 0 | 1 | 0 | -1 | 0 | 0 | 0 |
| TR89891|c0_g3|m.17539 | Lotus japonicus | Putative uncharacterized protein LjTED | LjTED | 33865 | 919.04 | 829.71 | 220.27 | 142.7 | 598.07 | 544.4 | 0 | 0 | -1 | -1 | 1 | -1 | -1 | 1 |
| TR89891|c0_g6|m.39059 | Vigna unguiculata | Ted2 protein | Ted2 | 8243.2 | 176.83 | 323.14 | 238.14 | 200.51 |  |  | 0 | -1 | 0 | -1 | -1 | 0 | 0 | 0 |
| TR133682|c0_g2|m.52573 | Ricinus communis | O-sialoglycoprotein endopeptidase, putative | RCOM_0452810 | 1510.3 |  | 73.05 | 53.327 | 16.572 |  | 81.25 | 0 | 0 | 0 | 0 | 0 | 0 | 0 | 0 |
| TR116429|c0_g1|m.26872 | Populus trichocarpa | Predicted protein | POPTRDRAFT_834540 | 6716.6 |  | 23.618 | 35.767 | 26.65 | 44.842 | 82.267 | 1 | 1 | 0 | 0 | 0 | 0 | 0 | 0 |
| TR162622|c0_g1|m.31768 | Ricinus communis | ATP-binding cassette transporter, putative | RCOM_1053730 | 800.98 | 4.4417 | 15.059 | 8.1087 | 8.5497 | 28.126 | 49.332 | 1 | 1 | 0 | 0 | 0 | 0 | 0 | 0 |
| TR109557|c0_g2|m.38953 | Populus trichocarpa | Predicted protein | POPTRDRAFT_552399 | 45353 | 326.28 | 531.43 | 186.08 | 111.95 | 1232.8 | 1227 | 0 | 0 | 0 | 1 | 1 | 0 | 1 | 1 |
| TR49334|c1_g5|m.58180 | Silene latifolia | Cytochrome b | cob | 2228.4 |  |  | 74.408 | 59.528 |  |  | 0 | 0 | 1 | 0 | -1 | 0 | 0 | 0 |
| TR121705|c0_g1|m.39208 | Vitis vinifera | Putative uncharacterized protein | VIT_01s0011g01370 | 3777.2 | 44.385 |  |  |  |  |  | 0 | 0 | -1 | -1 | 0 | 0 | 0 | 0 |
| TR55081|c0_g1|m.53630 | Vitis vinifera | Putative uncharacterized protein | VIT_07s0005g02010 | 5161.6 | 235.4 |  |  |  |  |  | 0 | 0 | -1 | -1 | 0 | 0 | 0 | 0 |
| TR142010|c0_g1|m.2852 | Vitis vinifera | Putative uncharacterized protein | VIT_14s0068g01020 | 280.08 |  |  |  | 8.2071 |  |  | 0 | 0 | 1 | 0 | -1 | 0 | 0 | 0 |
| TR142010|c0_g1|m.2853 | Medicago truncatula | Ubiquinol-cytochrome c reductase iron-sulfur subunit | MTR_7g084150 | 12814 | 116.5 | 40.668 | 98.887 | 62.904 |  | 65.861 | 0 | 0 | 0 | 0 | 0 | 0 | 0 | 0 |
| TR130700|c0_g1|m.36032 | Ricinus communis | NADH-cytochrome B5 reductase, putative | RCOM_0737910 | 354.83 |  |  |  |  |  |  | 0 | 0 | 0 | 0 | 0 | 0 | 0 | 0 |
| TR109586|c3_g4|m.25967 | Glycine max | Uncharacterized protein (Fragment) |  | 32067 | 887.13 | 661.28 | 747.4 | 941.25 | 90.962 | 57.132 | 0 | 0 | 0 | -1 | -1 | 0 | -1 | -1 |
| TR109590|c0_g4|m.36531 | Solanum lycopersicum | Sorbitol related enzyme | LeSDH | 5300.5 |  | 58.469 | 41.763 | 50.736 | 140.63 |  | 0 | 0 | 0 | 0 | 0 | 0 | 0 | 0 |
| TR142021|c0_g1|m.32279 | Spinacia oleracea | Dehydroascorbate reductase | DHAR | 36555 | 637.09 | 555.6 | 272.24 | 53.119 | 513.9 | 419.6 | 0 | 0 | 0 | 0 | 0 | 0 | 0 | 0 |
| TR150350|c1_g2|m.13090 | Ricinus communis | Eukaryotic translation initiation factor, putative | RCOM_1033150 | 21172 | 164.32 | 136 |  |  |  |  | 0 | 0 | -1 | -1 | 0 | 0 | 0 | 0 |
| TR131577|c0_g4|m.9989 | Vitis vinifera | Putative uncharacterized protein | VIT_14s0066g01320 | 184790 | 806.75 | 1191.6 | 828.06 | 603.69 | 8801.2 | 7650.5 | 0 | 0 | 0 | 1 | 1 | 0 | 1 | 1 |
| TR164860|c1_g3|m.35575 | Beta vulgaris | Fructokinase |  | 57966 | 594.68 | 717.63 | 446.26 | 254.67 | 774.7 | 614.61 | 0 | 0 | 0 | 0 | 0 | 0 | 0 | 0 |
| TR148285|c0_g9|m.34230 | Populus trichocarpa | Predicted protein | POPTRDRAFT_819236 | 2273.1 |  |  | 29.679 |  |  |  | 0 | 0 | 1 | 0 | -1 | 0 | 0 | 0 |
| TR94042|c0_g3|m.32477 | Ricinus communis | Selenium-binding protein, putative | RCOM_1552910 | 43230 | 168.38 | 465.52 | 285.25 | 432.86 | 1257 | 1182.9 | 1 | 1 | 0 | 1 | 1 | 0 | 1 | 1 |
| TR150894|c0_g2|m.31672 | Ricinus communis | Protein disulfide isomerase, putative | RCOM_1347720 | 8743 |  | 137.21 | 180.13 | 147.6 |  | 217.89 | 1 | 1 | 0 | 0 | 0 | 0 | 0 | 0 |
| TR130794|c0_g2|m.26576 | Populus trichocarpa | Putative uncharacterized protein |  | 4763 | 115.53 |  | 40.193 | 30.667 |  |  | 0 | -1 | 0 | -1 | -1 | 0 | 0 | 0 |
| TR149774|c0_g2|m.46649 | Antirrhinum majus | Mitochondrial benzaldehyde dehydrogenase | BALDH | 29514 | 181.78 | 220.98 | 280.98 | 281.19 | 649.53 | 134.85 | 1 | 1 | 0 | 0 | 0 | 0 | 0 | 0 |
| TR120801|c0_g1|m.55411 | Ricinus communis | Heat-shock protein, putative | RCOM_0497680 | 1024.4 |  |  |  |  | 65.104 |  | 0 | 0 | 0 | 1 | 1 | 0 | 0 | 0 |
| TR109761|c2_g3|m.27567 | Populus trichocarpa | Predicted protein | POPTRDRAFT_555562 | 29927 | 260.15 | 306.83 |  |  |  | 600.52 | 0 | 0 | -1 | 0 | 1 | 0 | 0 | 0 |
| TR109768|c1_g1|m.7209 | Ricinus communis | Valacyclovir hydrolase, putative | RCOM_1047030 | 3688.1 |  | 109.09 | 70.103 | 66.596 | 49.7 | 79.328 | 0 | -1 | -1 | 0 | 0 | -1 | 0 | 0 |
| TR109771|c2_g1|m.8516 | Glycine max | Uncharacterized protein | Gma.31608 | 61318 | 585.87 | 895.5 | 278.08 | 273.22 | 1994.9 | 1731.6 | 0 | 0 | 0 | 1 | 1 | 0 | 1 | 1 |
| TR122330|c0_g2|m.38250 | Vitis vinifera | Putative uncharacterized protein | VITISV_031212 | 3835.8 | 225.73 | 35.991 | 227.29 | 135.08 |  | 117.99 | 0 | 0 | 0 | 0 | 0 | 0 | 0 | 0 |
| TR94070|c0_g1|m.60953 | Ricinus communis | Eukaryotic translation initiation factor 2c, putative | RCOM_0617610 | 9225.5 | 137.33 | 110.6 | 186.97 | 111.22 | 131.79 | 289.28 | 1 | 1 | 0 | 0 | 0 | 0 | 0 | 0 |
| TR49562|c0_g4|m.46181 | Glycine max | Uncharacterized protein | Gma.414 | 15046 | 100.21 | 92.252 | 443.83 | 426.96 |  | 252 | 0 | 0 | 1 | 1 | 0 | 1 | 1 | 0 |
| TR121613|c0_g1|m.33776 | Fragaria ananassa | Glucose-1-phosphate adenylyltransferase | gpS | 258120 | 3642.5 | 3449.3 | 2022.5 | 1629 | 10195 | 9307 | 0 | 0 | -1 | 1 | 1 | -1 | 1 | 1 |
| TR109825|c1_g3|m.36651 | Populus trichocarpa | Predicted protein | POPTRDRAFT_649179 | 621.5 |  |  | 8.0877 |  |  | 214.45 | 1 | 1 | 1 | 1 | 0 | 0 | 0 | 0 |
| TR99592|c0_g3|m.6792 | Ricinus communis | Chaperone protein dnaJ, putative | RCOM_1448440 | 7582.7 |  | 119.46 | 97.497 | 93.381 |  |  | 0 | -1 | 0 | -1 | -1 | 0 | 0 | 0 |
| TR10996|c0_g2|m.43089 | Populus trichocarpa | Predicted protein | POPTRDRAFT_1100159 | 448.39 |  |  |  |  | 100.17 |  | 0 | 0 | 0 | 1 | 1 | 0 | 0 | 0 |
| TR109990|c0_g2|m.7773 | Populus trichocarpa | Iaa-amino acid hydrolase 6 | ILL6 | 1051.4 |  |  |  |  |  |  | 0 | 0 | 0 | 0 | 0 | 0 | 0 | 0 |
| TR110001|c3_g7|m.10916 | Vitis vinifera | Putative uncharacterized protein | VIT_19s0014g01900 | 2016.2 | 17.991 |  | 32.414 | 22.627 |  |  | 0 | 0 | 0 | -1 | -1 | 0 | 0 | 0 |
| TR95039|c0_g2|m.48075 | Beta vulgaris | Cytochrome c oxidase subunit 2 | cox2 | 66928 | 923.9 | 1236.1 | 595.13 | 175.23 | 2053.9 | 1524.2 | 0 | 0 | 0 | 0 | 0 | 0 | 0 | 0 |
| TR110025|c3_g2|m.22820 | Ilex cornuta | Hypothetical chloroplast RF2 | ycf2 | 6.4137 |  |  |  |  |  |  | 0 | 0 | 0 | 0 | 0 | 0 | 0 | 0 |
| TR132791|c2_g2|m.4743 | Weingartia kargliana | Photosystem Q(B) protein (Fragment) | psbA | 214200 | 1981.2 | 2104 | 3174 | 2011.1 | 5182.4 | 4993.3 | 1 | 1 | 0 | 1 | 0 | 0 | 1 | 0 |
| TR110029|c0_g1|m.46949 | Vitis vinifera | Putative uncharacterized protein | VIT_01s0011g04520 | 3290.2 | 290.19 | 351.49 | 55.438 | 37.758 | 84.723 | 69.136 | 0 | 0 | -1 | -1 | 0 | -1 | -1 | 0 |
| TR110031|c1_g1|m.30283 | Vitis vinifera | Putative uncharacterized protein | VIT_12s0057g00020 | 8599.4 | 38.072 | 163.68 | 100.31 | 118.57 | 89.509 | 386.1 | 1 | 1 | 0 | 0 | 0 | 0 | 0 | 0 |
| TR148822|c0_g3|m.3264 | Ricinus communis | DNA gyrase subunit B, putative | RCOM_0692980 | 297.06 | 5.2711 |  |  |  |  |  | 0 | 0 | -1 | -1 | 0 | 0 | 0 | 0 |
| TR45888|c0_g1|m.35684 | Populus trichocarpa | Predicted protein | POPTRDRAFT_712458 | 30337 | 686.66 | 614.84 | 157.1 | 65.41 |  | 1088.2 | 0 | 0 | -1 | 0 | 0 | -1 | 0 | 0 |
| TR110064|c0_g4|m.22544 | Ricinus communis | Lysosomal alpha-mannosidase, putative | RCOM_1445250 | 2986.8 | 20.181 | 60.468 | 21.512 | 36.058 |  |  | 0 | -1 | 0 | -1 | -1 | 0 | 0 | 0 |
| TR110065|c0_g2|m.20103 | Ricinus communis | Beta-galactosidase | RCOM_1595960 | 1368.1 | 77.062 | 88.932 | 10.29 | 45.1 | 25.058 |  | 0 | 0 | 0 | 0 | 0 | 0 | 0 | 0 |
| TR110065|c0_g4|m.49107 | Populus trichocarpa | Beta-galactosidase | POPTRDRAFT_1113531 | 370.08 |  |  | 5.6783 |  |  |  | 0 | 0 | 1 | 0 | -1 | 0 | 0 | 0 |
| TR152164|c0_g3|m.38173 | Populus trichocarpa | Predicted protein | POPTRDRAFT_832749 | 3602.7 |  | 35.481 |  | 3.334 | 185.73 | 65.326 | 0 | 0 | 0 | 0 | 0 | 0 | 0 | 0 |
| TR110069|c1_g5|m.61877 | Vitis vinifera | Putative uncharacterized protein | VIT_19s0014g01570 | 18095 | 384.21 | 551.93 |  |  | 1125.5 |  | 0 | 0 | -1 | 0 | 1 | 0 | 0 | 0 |
| TR110072|c0_g8|m.25103 | Glycine max | Uncharacterized protein | Gma.19648 | 1125.4 |  |  | 51.088 | 44.635 |  |  | 0 | 0 | 1 | 0 | -1 | 0 | 0 | 0 |
| TR110075|c0_g2|m.29192 | Vitis vinifera | Putative uncharacterized protein | VIT_03s0063g00480 | 248.32 |  |  |  | 5.1144 |  |  | 0 | 0 | 1 | 0 | -1 | 0 | 0 | 0 |
| TR11017|c0_g5|m.2964 | Arachis hypogaea | Translationally controlled tumor-like protein |  | 326970 | 2448 | 3069.7 | 2031.7 | 1513.1 | 10911 | 10345 | 0 | 0 | 0 | 1 | 1 | 0 | 1 | 1 |
| TR16102|c0_g1|m.38895 | Nepenthes alata | Aspartic proteinase 2 | NaAP2 | 20357 | 332.91 | 330.9 | 124.5 | 30.861 |  |  | 0 | -1 | -1 | -1 | -1 | -1 | 0 | 0 |
| TR11036|c0_g2|m.5840 | Beta vulgaris | 6,7-dimethyl-8-ribityllumazine synthase |  | 11874 | 24.631 |  | 112.76 |  |  | 510.2 | 1 | 1 | 0 | 0 | 0 | 0 | 0 | 0 |
| TR71740|c0_g1|m.4689 | Ricinus communis | 40S ribosomal protein S27 | RCOM_1300070 | 20651 |  |  |  |  | 1978.4 | 1662.3 | 0 | 0 | 0 | 1 | 1 | 0 | 0 | 0 |
| TR53416|c0_g1|m.55406 | Populus trichocarpa | 60S ribosomal protein L36 | POPTRDRAFT_822944 | 37237 | 271.13 |  | 355.8 | 275.41 | 1625.9 | 2202 | 1 | 1 | 0 | 0 | 1 | 0 | 0 | 1 |
| TR53416|c0_g5|m.23690 | Populus trichocarpa | 60S ribosomal protein L36 | POPTRDRAFT_822944 | 15708 | 96.087 |  | 139.83 | 115.71 | 911.38 | 405.28 | 1 | 1 | 0 | 0 | 0 | 0 | 0 | 0 |
| TR11049|c0_g1|m.4749 | Vitis pseudoreticulata | SGT1 |  | 3530.4 |  |  | 41.999 | 52.467 | 207.7 |  | 1 | 1 | 1 | 1 | 1 | 0 | 0 | 1 |
| TR45910|c0_g1|m.56083 | Ricinus communis | Heat shock protein, putative | RCOM_1466370 | 788.78 | 28.767 |  |  | 21.45 | 61.809 | 69.432 | 0 | 0 | 0 | 0 | 0 | 0 | 0 | 0 |
| TR110732|c0_g9|m.38964 | Ricinus communis | Ceramidase, putative | RCOM_0731110 | 9181.5 | 43.847 | 107.9 | 15.892 | 114.71 | 8.9143 |  | 0 | -1 | 0 | 0 | 0 | 0 | 0 | 0 |
| TR110733|c0_g1|m.6389 | Ricinus communis | Isoamylase, putative | RCOM_0176490 | 7699.8 | 80.775 | 44.682 | 69.9 | 63.421 |  | 116.17 | 1 | 1 | 0 | 0 | 0 | 0 | 0 | 0 |
| TR110739|c1_g10|m.38029 | Gossypium hirsutum | Phospholipase D | PLDalpha | 40634 | 790.86 | 681.44 | 768.17 | 572.21 | 281.91 | 880.94 | 0 | -1 | 0 | 0 | 0 | 0 | 0 | 0 |
| TR110739|c1_g3|m.52075 | Arachis hypogaea | Phospholipase D | plda2 | 135050 | 1342.8 | 1588.5 | 1970.5 | 1313.5 | 4754.2 | 1985.9 | 1 | 1 | 0 | 0 | 0 | 0 | 0 | 0 |
| TR110739|c1_g5|m.15264 | Glycine max | Phospholipase D | Gma.4902 | 3732.1 | 168.21 |  | 240.2 | 265 |  |  | 0 | 0 | 0 | -1 | -1 | 0 | 0 | 0 |
| TR110739|c1_g7|m.23191 | Glycine max | Phospholipase D | Gma.4902 | 40740 | 153.77 | 509.12 | 928.77 | 644.64 | 1219.4 | 1540.6 | 1 | 1 | 0 | 1 | 0 | 0 | 1 | 0 |
| TR110745|c0_g5|m.9340 | Vitis vinifera | Putative uncharacterized protein | VIT_01s0010g02370 | 2317.9 |  | 38.663 | 17.873 |  | 90.511 |  | 0 | 0 | 0 | 0 | 0 | 0 | 0 | 0 |
| TR137235|c0_g1|m.62036 | Vitis vinifera | Putative uncharacterized protein | VIT_19s0014g05310 | 2593.1 | 26.081 | 45.928 | 26.785 | 14.624 | 18.849 | 127.77 | 0 | 0 | 0 | 0 | 0 | 0 | 0 | 0 |
| TR134529|c2_g10|m.28552 | Ricinus communis | Pentatricopeptide repeat-containing protein, putative | RCOM_0658300 | 294.96 |  |  |  |  |  |  | 0 | 0 | 0 | 0 | 0 | 0 | 0 | 0 |
| TR110758|c0_g5|m.7654 | Ricinus communis | Protein disulfide isomerase, putative | RCOM_1030540 | 15945 | 24.484 | 12.772 | 39.024 | 52.371 | 244.54 | 94.461 | 1 | 1 | 0 | 0 | 0 | 0 | 0 | 0 |
| TR110764|c0_g6|m.20820 | Arabidopsis thaliana | AT5g22790/K8E10_2 | RER1 | 5377 | 198.06 | 218.1 | 160.77 | 164.72 |  |  | 0 | -1 | 0 | -1 | -1 | 0 | 0 | 0 |
| TR110766|c0_g12|m.37377 | Vitis vinifera | Putative uncharacterized protein | VIT_10s0597g00030 | 2102.4 |  |  | 65.309 | 32.102 |  |  | 0 | 0 | 1 | 0 | -1 | 0 | 0 | 0 |
| TR110769|c1_g2|m.26209 | Vitis vinifera | Putative uncharacterized protein | VIT_07s0151g00460 | 981.43 |  |  | 12.182 | 5.9317 | 87.243 | 25.504 | 1 | 1 | 1 | 1 | 0 | 0 | 0 | 0 |
| TR47946|c0_g1|m.19934 | Rheum australe | Translation initiation factor |  | 3845.7 | 17.311 | 43.016 | 263.43 | 206.41 |  |  | 0 | 0 | 1 | -1 | -1 | 1 | 0 | 0 |
| TR110771|c0_g2|m.1118 | Vitis vinifera | Putative uncharacterized protein | VIT_12s0034g02160 | 305.9 | 19.62 | 19.577 |  |  | 25.915 |  | 0 | 0 | -1 | 0 | 1 | 0 | 0 | 0 |
| TR110784|c1_g1|m.44708 | Vitis vinifera | Putative uncharacterized protein | VIT_08s0007g08690 | 1046.4 |  |  |  |  |  |  | 0 | 0 | 0 | 0 | 0 | 0 | 0 | 0 |
| TR110797|c0_g4|m.43178 | Vitis vinifera | Putative uncharacterized protein | VIT_14s0083g00340 | 184.18 |  |  |  |  |  |  | 0 | 0 | 0 | 0 | 0 | 0 | 0 | 0 |
| TR110801|c0_g5|m.42928 | Spinacia oleracea | SocL12 (Chloroplast ribosomal protein) (Precursor) | Soc rpl12 | 1113.6 |  |  |  |  | 122.04 |  | 0 | 0 | 0 | 1 | 1 | 0 | 0 | 0 |
| TR110815|c2_g1|m.38612 | Ricinus communis | Ras-GTPase-activating protein-binding protein, putative | RCOM_0542300 | 2072.4 | 145.43 | 133.02 |  | 54.52 |  |  | 0 | -1 | 0 | -1 | -1 | 0 | 0 | 0 |
| TR110823|c0_g2|m.42779 | Ricinus communis | Aspartate kinase, putative | RCOM_0742100 | 3528.5 | 49.302 | 44.483 | 14.226 | 13.094 | 91.897 | 96.719 | 0 | 0 | -1 | 1 | 1 | -1 | 1 | 1 |
| TR110827|c1_g4|m.55685 | Ricinus communis | Magnesium-protoporphyrin IX monomethyl ester [oxidative] cyclase, chloroplast, putative | RCOM_1272340 | 2327.7 |  | 27.729 |  |  |  | 260.92 | 0 | 0 | -1 | 0 | 1 | 0 | 0 | 0 |
| TR110916|c1_g3|m.11290 | Vitis vinifera | Putative uncharacterized protein | VIT_14s0066g02380 | 25393 | 267.81 | 302.75 | 398.35 | 310.48 | 93.649 | 94.809 | 0 | 0 | 0 | -1 | -1 | 0 | -1 | -1 |
| TR150354|c0_g1|m.50751 | Ricinus communis | Putative uncharacterized protein | RCOM_1599540 | 13488 | 206.15 | 235.53 |  | 22.821 | 665.94 | 577.33 | 0 | 0 | 0 | 1 | 0 | 0 | 1 | 0 |
| TR110919|c0_g4|m.23250 | Vitis vinifera | Putative uncharacterized protein | VIT_11s0016g05580 | 11791 | 250.25 | 280.07 | 188.69 | 65.508 | 66.339 | 138.48 | 0 | -1 | 0 | 0 | 0 | 0 | 0 | 0 |
| TR110919|c0_g7|m.6497 | Glycine max | Putative uncharacterized protein |  | 1519 |  |  |  |  |  |  | 0 | 0 | 0 | 0 | 0 | 0 | 0 | 0 |
| TR94262|c2_g1|m.62078 | Spinacia oleracea | L-galactose dehydrogenase | GDH | 12221 | 77.023 | 26.776 | 74.016 |  | 119.57 | 283.83 | 1 | 1 | 0 | 0 | 0 | 0 | 0 | 0 |
| TR110938|c2_g1|m.59017 | Vitis vinifera | Putative uncharacterized protein | VITISV_035429 | 1062.2 |  | 81.43 |  |  |  |  | 0 | 0 | -1 | -1 | 0 | 0 | 0 | 0 |
| TR110938|c2_g2|m.12594 | Vitis vinifera | Putative uncharacterized protein | VITISV_016037 | 16950 | 69.126 |  |  | 65.482 | 615.19 | 677.58 | 0 | 0 | 0 | 0 | 0 | 0 | 0 | 0 |
| TR110942|c0_g6|m.9462 | Ricinus communis | Uv excision repair protein rad23, putative | RCOM_1725680 | 8800.2 | 330.27 | 93.005 | 288.69 | 239.48 | 46.036 | 271.94 | 0 | 0 | 0 | 0 | 0 | 0 | 0 | 0 |
| TR110952|c0_g4|m.19927 | Vitis vinifera | Putative uncharacterized protein | VIT_08s0007g06190 | 2387 |  | 22.087 |  |  |  |  | 0 | 0 | -1 | -1 | 0 | 0 | 0 | 0 |
| TR130409|c1_g3|m.60644 | Silene latifolia | Oxysterol-binding protein (Fragment) |  | 2704.9 |  |  |  | 122.31 |  |  | 0 | 0 | 1 | 0 | -1 | 0 | 0 | 0 |
| TR133336|c0_g2|m.39315 | Vitis vinifera | Putative uncharacterized protein | VIT_03s0038g03210 | 33386 | 278.43 | 428.32 | 481.06 | 277.77 | 422.88 | 366.94 | 1 | 1 | 0 | 0 | 0 | 0 | 0 | 0 |
| TR110967|c2_g2|m.29844 | Ricinus communis | Alpha-glucosidase, putative | RCOM_0030540 | 1747.7 | 20.69 |  | 23.004 |  |  |  | 0 | 0 | 0 | -1 | -1 | 0 | 0 | 0 |
| TR94266|c0_g1|m.21490 | Vitis vinifera | Putative uncharacterized protein | VIT_12s0034g01790 | 35367 |  |  | 2520.2 |  | 5796.8 |  | 1 | 1 | 1 | 1 | 0 | 0 | 0 | 0 |
| TR150819|c0_g1|m.28711 | Populus trichocarpa | Predicted protein | POPTRDRAFT_861846 | 30688 | 58.631 | 98.744 | 228.11 | 245.35 | 127.21 | 191.47 | 0 | 0 | 1 | 0 | 0 | 1 | 0 | 0 |
| TR148832|c0_g4|m.55277 | Citrus sinensis | Hexokinase |  | 957.52 |  |  | 13.164 |  |  |  | 0 | 0 | 1 | 0 | -1 | 0 | 0 | 0 |
| TR22881|c0_g1|m.29978 | Oryza sativa | Dehydration stress-induced protein | OSJNBa0058E19.13 | 3511 |  |  |  |  |  |  | 0 | 0 | 0 | 0 | 0 | 0 | 0 | 0 |
| TR11143|c0_g1|m.51531 | Vigna radiata | 70 kDa heat shock cognate protein 3 |  | 20562 | 455.89 | 215 | 602.02 | 463.28 | 391.37 | 128.87 | 0 | 0 | 0 | 0 | 0 | 0 | 0 | 0 |
| TR111922|c0_g3|m.6199 | Populus trichocarpa | Predicted protein | POPTRDRAFT_816875 | 1113.7 |  |  |  | 41.049 | 100.98 |  | 1 | 1 | 1 | 1 | 0 | 0 | 0 | 0 |
| TR132267|c2_g1|m.50368 | Vitis vinifera | Putative uncharacterized protein | VIT_05s0029g01370 | 7172.8 | 13.844 |  |  | 6.5868 | 169.67 | 85.606 | 0 | 0 | 0 | 0 | 0 | 0 | 0 | 0 |
| TR111975|c0_g1|m.43531 | Prunus persica | Cell wall invertase 1 | CWINV1 | 276.76 |  |  |  |  |  |  | 0 | 0 | 0 | 0 | 0 | 0 | 0 | 0 |
| TR111976|c1_g1|m.37436 | Ricinus communis | Osmotin, putative | RCOM_1685840 | 13047 | 156.14 | 126.03 |  |  | 176.79 |  | 0 | 0 | -1 | 0 | 1 | 0 | 0 | 0 |
| TR111985|c0_g5|m.59633 | Citrus aurantium | Putative caffeic acid O-methyltransferase |  | 5486.9 | 66.298 |  |  |  | 173.15 |  | 0 | 0 | -1 | 0 | 1 | 0 | 0 | 0 |
| TR111985|c0_g6|m.30197 | Mesembryanthemum crystallinum | Caffeic acid 3-O-methyltransferase (Fragment) |  | 17143 |  | 70.605 | 132.2 | 65.357 |  |  | 0 | 0 | 0 | -1 | -1 | 0 | 0 | 0 |
| TR115832|c0_g1|m.30335 | Ricinus communis | D-lactate dehydrogenase, putative | RCOM_0422880 | 965.01 |  |  |  | 13.155 | 36.533 |  | 1 | 1 | 1 | 1 | 0 | 0 | 0 | 0 |
| TR112002|c0_g1|m.42994 | Phytolacca americana | Glucosyltransferase | PaGT1 | 7620.4 | 286.03 | 316.64 |  |  |  | 131.56 | 0 | 0 | -1 | 0 | 1 | 0 | 0 | 0 |
| TR112002|c0_g2|m.26493 | Phytolacca americana | Glucosyltransferase | PaGT1 | 1449.9 | 33.195 | 52.382 | 40.171 |  |  |  | 0 | -1 | 0 | -1 | -1 | 0 | 0 | 0 |
| TR112009|c0_g2|m.24187 | Vitis vinifera | Putative uncharacterized protein | VIT_14s0006g02020 | 36086 | 143.82 | 394.57 | 507.16 | 329.36 | 477.51 | 969.04 | 1 | 1 | 0 | 0 | 0 | 0 | 0 | 0 |
| TR112187|c0_g5|m.26240 | Ricinus communis | T-complex protein 1 subunit delta | RCOM_1397250 | 15345 | 111.46 | 103.63 | 114.04 | 36.315 | 594 | 283.42 | 0 | 0 | 0 | 0 | 0 | 0 | 0 | 0 |
| TR112188|c0_g2|m.14923 | Vitis vinifera | Chloroplast chaperonin 21 | cpn21 | 21238 | 367.94 | 524.46 | 429.08 | 344.88 | 365.02 | 509.3 | 0 | 0 | 0 | 0 | 0 | 0 | 0 | 0 |
| TR112189|c1_g12|m.27183 |  |  |  | 13611 | 1114.8 | 1050.5 | 832.88 | 655.55 |  |  | 0 | -1 | 0 | -1 | -1 | 0 | 0 | 0 |
| TR112189|c2_g10|m.24673 | Glycine max | Uncharacterized protein |  | 13728 | 360.52 |  | 470.82 | 386.18 |  | 173.83 | 0 | 0 | 0 | 0 | 0 | 0 | 0 | 0 |
| TR112189|c2_g11|m.35488 | Hordeum vulgare | Predicted protein |  | 12492 | 690.86 | 265.26 | 507.22 | 416.55 |  |  | 0 | 0 | 0 | -1 | -1 | 0 | 0 | 0 |
| TR112189|c2_g3|m.51619 | Vitis vinifera | Putative uncharacterized protein | VITISV_018238 | 2080.7 |  | 123.84 | 223.4 |  |  |  | 0 | 0 | 0 | -1 | -1 | 0 | 0 | 0 |
| TR112199|c0_g1|m.56733 | Populus trichocarpa | Predicted protein | POPTRDRAFT_817727 | 4736.8 |  | 134.82 |  | 21.105 |  |  | 0 | -1 | 0 | -1 | -1 | 0 | 0 | 0 |
| TR112214|c0_g4|m.2978 | Vitis vinifera | Putative uncharacterized protein | VIT_07s0005g02620 | 1180.9 |  |  |  |  |  |  | 0 | 0 | 0 | 0 | 0 | 0 | 0 | 0 |
| TR112218|c0_g3|m.45605 | Picrorhiza kurrooa | Monodehydroascorbate reductase | mdhar | 7972.1 |  |  | 62.41 | 56.667 | 231.66 | 199.61 | 1 | 1 | 1 | 1 | 1 | 0 | 0 | 1 |
| TR153488|c0_g5|m.60585 | Vitis vinifera | Putative uncharacterized protein | VIT_07s0129g00270 | 5421.8 | 84.534 | 53.782 | 49.092 | 37.201 | 143.19 |  | 0 | 0 | 0 | 0 | 0 | 0 | 0 | 0 |
| TR112230|c0_g7|m.6805 | Vitis vinifera | Putative uncharacterized protein | VIT_08s0040g01760 | 227290 | 4110.8 | 4199.4 | 1015.8 | 880.06 | 6354.3 | 3671.5 | 0 | 0 | -1 | 0 | 0 | -1 | 0 | 0 |
| TR112238|c0_g2|m.32996 | Ricinus communis | Heat shock protein, putative | RCOM_0759010 | 6914.9 | 135.93 | 74.275 | 52.877 | 6.9179 | 64.116 |  | 0 | 0 | 0 | 0 | 0 | 0 | 0 | 0 |
| TR112238|c0_g4|m.21259 | Medicago truncatula | Chaperone DnaK | MTR_2g005690 | 5487.5 | 39.607 | 4.4325 | 23.537 | 11.229 |  |  | 0 | 0 | 0 | -1 | -1 | 0 | 0 | 0 |
| TR112240|c0_g8|m.31414 | Peperomia rupiseda | Alanine glyoxylate aminotransferase (Fragment) | agt1 | 51128 | 332.89 | 569.96 | 42.605 | 220.21 | 586.75 | 840.6 | 0 | 0 | 0 | 0 | 0 | 0 | 0 | 0 |
| TR112243|c2_g3|m.35999 | Populus trichocarpa | Predicted protein | POPTRDRAFT_711545 | 23724 | 453.78 | 497.78 | 163.47 | 136.58 | 243.76 | 262.5 | 0 | 0 | -1 | -1 | 1 | -1 | -1 | 1 |
| TR112251|c0_g2|m.35175 | Ricinus communis | Ferredoxin--NADP reductase, putative | RCOM_0431000 | 5577 | 242.58 | 248.71 | 88.759 | 96.249 | 123.16 | 83.648 | 0 | 0 | -1 | -1 | 0 | -1 | -1 | 0 |
| TR112255|c0_g2|m.18420 | Vitis vinifera | Putative uncharacterized protein | VITISV_025150 | 1902.7 |  |  | 109.56 |  |  |  | 0 | 0 | 1 | 0 | -1 | 0 | 0 | 0 |
| TR112257|c0_g3|m.13279 | Medicago truncatula | Uncharacterized protein |  | 14924 |  |  | 257.89 | 204.43 | 189.69 | 158.61 | 0 | 0 | 1 | 1 | 0 | 0 | 0 | 0 |
| TR81391|c1_g1|m.12390 | Arabidopsis thaliana | Putative carboxyphosphonoenolpyruvate mutase | At1g77060/F22K20.14 | 2797.5 |  |  |  |  |  |  | 0 | 0 | 0 | 0 | 0 | 0 | 0 | 0 |
| TR7331|c1_g1|m.52186 | Populus trichocarpa | Predicted protein | POPTRDRAFT_551354 | 1918.7 | 22.72 | 124.25 |  |  |  |  | 0 | 0 | -1 | -1 | 0 | 0 | 0 | 0 |
| TR112613|c0_g1|m.7696 | Vitis vinifera | Putative uncharacterized protein | VITISV_027853 | 7297.6 | 77.426 | 76.189 | 117.07 |  | 114.59 | 97.865 | 0 | 0 | 1 | 0 | 0 | 1 | 0 | 0 |
| TR11262|c0_g2|m.63111 | Vitis vinifera | Putative uncharacterized protein | VITISV_004108 | 3520.3 |  |  |  | 75.287 |  |  | 0 | 0 | 1 | 0 | -1 | 0 | 0 | 0 |
| TR112624|c0_g1|m.40536 | Vitis vinifera | Putative uncharacterized protein | VIT_04s0008g05000 | 740.28 |  |  |  |  |  |  | 0 | 0 | 0 | 0 | 0 | 0 | 0 | 0 |
| TR11263|c0_g1|m.48746 | Ricinus communis | Heat shock protein, putative | RCOM_1442270 | 2510.1 |  |  |  |  | 116.81 |  | 0 | 0 | 0 | 1 | 1 | 0 | 0 | 0 |
| TR112637|c0_g8|m.39209 | Vitis vinifera | Putative uncharacterized protein | VIT_18s0001g00690 | 869.91 |  |  |  |  |  |  | 0 | 0 | 0 | 0 | 0 | 0 | 0 | 0 |
| TR81402|c0_g1|m.58320 | Vitis vinifera | Putative uncharacterized protein | VIT_04s0008g05330 | 21437 | 447.93 | 310.9 | 378.23 | 245.2 | 264.24 | 275.25 | 0 | -1 | 0 | 0 | 0 | 0 | 0 | 0 |
| TR81402|c0_g1|m.58321 | Populus trichocarpa | Predicted protein | POPTRDRAFT_819597 | 30297 | 280.73 | 433.16 | 420.15 | 242.16 | 927.64 | 382.16 | 0 | 0 | 0 | 0 | 0 | 0 | 0 | 0 |
| TR69692|c0_g2|m.46735 | Vitis vinifera | Putative uncharacterized protein | VIT_18s0001g10780 | 21190 | 224.58 | 397.17 | 313.61 | 204.13 | 136.36 | 611.98 | 0 | 0 | 0 | 0 | 0 | 0 | 0 | 0 |
| TR142009|c1_g1|m.44695 | Vitis vinifera | Putative uncharacterized protein | VIT_18s0001g10590 | 6324.5 | 222.78 | 234.62 | 242.81 | 54.877 | 99.969 |  | 0 | -1 | 0 | 0 | 0 | 0 | 0 | 0 |
| TR112662|c1_g2|m.54010 | Vitis vinifera | Putative uncharacterized protein | VIT_14s0030g01820 | 1611.6 |  |  |  | 50.186 |  | 153.2 | 1 | 1 | 1 | 1 | 0 | 0 | 0 | 0 |
| TR140343|c2_g1|m.3209 | Ricinus communis | Calcium ion binding protein, putative | RCOM_0484680 | 12691 | 114.54 | 89.867 | 161.71 | 158.41 | 790.23 | 169.86 | 1 | 1 | 1 | 0 | 0 | 1 | 0 | 0 |
| TR112675|c0_g2|m.53533 | Weingartia kargliana | Ribulose-1,5-bisphosphate carboxylase/oxygenase large subunit (Fragment) | rbcL | 3141800 | 21635 | 22203 | 30487 | 23971 | 75894 | 76617 | 1 | 1 | 0 | 1 | 1 | 0 | 1 | 1 |
| TR112677|c0_g2|m.22621 | Vitis vinifera | Putative uncharacterized protein | VIT_08s0040g03200 | 52298 | 292.49 | 339.39 | 637.38 | 491.13 | 1341.1 | 1745.3 | 1 | 1 | 0 | 1 | 1 | 0 | 1 | 1 |
| TR133546|c0_g4|m.34039 | Populus trichocarpa | Predicted protein | POPTRDRAFT_746640 | 77943 | 606.63 | 642.9 | 477.49 | 334.36 | 287.95 | 265.66 | 0 | -1 | 0 | -1 | 0 | 0 | -1 | 0 |
| TR63454|c0_g1|m.30578 | Lotus japonicus | RAB2A | rab2A | 21692 | 457.04 | 290.68 | 187.85 | 271.13 | 648.84 | 696.78 | 0 | 0 | 0 | 0 | 1 | 0 | 0 | 1 |
| TR112691|c0_g2|m.57964 | Populus trichocarpa | Predicted protein | POPTRDRAFT_643276 | 1938.5 | 38.217 | 25.478 |  |  |  | 202.41 | 0 | 0 | -1 | 1 | 1 | 0 | 1 | 0 |
| TR8988|c0_g1|m.38221 | Beta vulgaris | Adenosylhomocysteinase | BvSAHH1 | 15496 | 144.88 | 136.41 | 247.35 | 268.89 | 68.644 | 126.92 | 0 | 0 | 1 | 0 | -1 | 1 | 0 | -1 |
| TR151129|c0_g1|m.50675 | Beta vulgaris | Salt tolerance protein 1 | sato1 | 595.24 | 6.4509 |  | 111.16 | 63.599 |  |  | 0 | 0 | 0 | -1 | -1 | 0 | 0 | 0 |
| TR11372|c0_g1|m.60400 | Vitis vinifera | Peptidyl-prolyl cis-trans isomerase | VIT_00s0260g00060 | 45944 | 1019.9 | 1002.3 | 618.53 | 722.23 | 1259.1 | 1084.1 | 0 | 0 | -1 | 0 | 1 | -1 | 0 | 1 |
| TR11411|c0_g1|m.21405 | Populus trichocarpa | Predicted protein | POPTRDRAFT_836179 | 1921.3 |  | 50.722 | 140.36 |  | 116.83 | 127.95 | 0 | 0 | 0 | 0 | 0 | 0 | 0 | 0 |
| TR1148|c0_g1|m.25361 | Mesembryanthemum nodiflorum | Carbonic anhydrase | CA2 | 5191.9 |  |  |  |  | 1165.3 |  | 0 | 0 | 0 | 1 | 1 | 0 | 0 | 0 |
| TR146032|c0_g13|m.52654 | Ricinus communis | Cysteine protease, putative | RCOM_1449120 | 1851.2 | 245.68 | 367.43 |  |  |  |  | 0 | 0 | -1 | -1 | 0 | 0 | 0 | 0 |
| TR25230|c1_g1|m.25213 | Ricinus communis | Mitochondrial oxoglutarate/malate carrier protein, putative | RCOM_1361330 | 15352 | 544.19 | 503.72 | 321.5 | 149.25 | 157.6 | 198.88 | 0 | -1 | 0 | -1 | 0 | 0 | -1 | 0 |
| TR16176|c0_g3|m.42384 | Camellia sinensis | Histone H2A |  | 28317 | 583.19 | 1564.9 | 1645.8 | 1139 | 529.03 | 405.3 | 0 | 0 | 0 | 0 | 0 | 0 | 0 | 0 |
| TR63106|c0_g1|m.34254 | Vitis vinifera | Putative uncharacterized protein | VIT_13s0067g01510 | 665.04 | 35.258 |  |  | 13.184 |  |  | 0 | -1 | 0 | -1 | -1 | 0 | 0 | 0 |
| TR115468|c0_g5|m.15169 | Nelumbo nucifera | Thioredoxin-dependent peroxidase | TDP | 2984.7 |  |  |  |  |  |  | 0 | 0 | 0 | 0 | 0 | 0 | 0 | 0 |
| TR115478|c1_g7|m.40252 | Vitis vinifera | Putative uncharacterized protein | VIT_08s0007g01430 | 39336 | 239.54 | 379.21 | 356.88 | 408.35 | 1211.3 | 483.73 | 1 | 1 | 0 | 0 | 0 | 0 | 0 | 0 |
| TR57159|c1_g2|m.43184 | Populus trichocarpa | Predicted protein | POPTRDRAFT_669482 | 249.75 |  |  |  | 18.309 |  |  | 0 | 0 | 1 | 0 | -1 | 0 | 0 | 0 |
| TR81456|c0_g1|m.49645 | Amaranthus hypochondriacus | Betaine aldehyde dehydrogenase | ahybadh4 | 36371 | 529.67 | 609.75 | 369.57 | 153.86 | 1167.2 | 499.12 | 0 | 0 | 0 | 0 | 0 | 0 | 0 | 0 |
| TR115813|c1_g1|m.17186 | Mesembryanthemum crystallinum | Monodehydroascorbate reductase | mdhar1 | 101440 | 1441.1 | 1473 | 1805.2 | 1452.4 | 2071.5 | 1851 | 1 | 1 | 0 | 0 | 0 | 0 | 0 | 0 |
| TR115813|c3_g4|m.16887 | Vitis vinifera | Putative uncharacterized protein | VIT_06s0004g01160 | 53850 | 371.96 | 514.31 | 556.78 | 637.79 | 1549.7 | 1509 | 1 | 1 | 0 | 1 | 1 | 0 | 1 | 1 |
| TR122479|c1_g7|m.32875 | Vitis vinifera | Putative uncharacterized protein | VIT_06s0004g01160 | 47036 | 292.17 | 165.16 | 375.82 | 387.15 | 1433.6 | 1032.4 | 1 | 1 | 0 | 1 | 0 | 0 | 1 | 0 |
| TR115818|c0_g6|m.30443 | Vitis vinifera | Putative uncharacterized protein | VIT_08s0040g02980 | 604.24 |  |  | 28.981 | 24.975 |  |  | 0 | 0 | 1 | 0 | -1 | 0 | 0 | 0 |
| TR135036|c0_g3|m.12706 | Vitis vinifera | Putative uncharacterized protein | VIT_16s0039g02220 | 1111.6 |  |  |  | 8.0197 | 88.694 | 82.032 | 1 | 1 | 1 | 1 | 1 | 0 | 0 | 1 |
| TR115822|c0_g1|m.37201 | Ricinus communis | Phosphofructokinase, putative | RCOM_0903240 | 389740 | 884.38 | 1659.1 | 77.183 | 629.21 | 23738 | 14741 | 0 | 0 | 0 | 0 | 0 | 0 | 0 | 0 |
| TR115823|c0_g2|m.58059 | Vitis vinifera | Putative uncharacterized protein | VIT_14s0060g01630 | 8681.6 | 30.026 | 114.53 | 254.15 | 62.378 | 353.13 | 86.195 | 1 | 1 | 0 | 0 | 0 | 0 | 0 | 0 |
| TR115823|c0_g2|m.58060 | Ricinus communis | Eukaryotic translation initiation factor 3 subunit, putative | RCOM_1434190 | 2385.6 |  | 84.198 |  | 46.588 |  |  | 0 | -1 | 0 | -1 | -1 | 0 | 0 | 0 |
| TR115827|c0_g4|m.62436 | Populus trichocarpa | Predicted protein | POPTRDRAFT_834438 | 97378 | 1874.7 | 1957.3 | 716.7 | 980.14 | 994.44 | 980.73 | 0 | 0 | -1 | -1 | 0 | -1 | -1 | 0 |
| TR115827|c0_g4|m.62437 | Nepenthes alata | Aspartic proteinase 4 | NaAP4 | 11196 |  | 155.05 | 180.02 | 198.13 |  |  | 0 | 0 | 0 | -1 | -1 | 0 | 0 | 0 |
| TR115838|c0_g7|m.37002 | Populus trichocarpa | Putative uncharacterized protein |  | 2331.6 | 50.457 | 38.568 | 13.367 | 19.759 |  | 55.291 | 0 | 0 | 0 | 0 | 0 | 0 | 0 | 0 |
| TR115841|c0_g4|m.54473 | Malus domestica | Caffeic acid O-methyltransferase | omt4 | 4755 |  |  |  | 110.68 |  |  | 0 | 0 | 1 | 0 | -1 | 0 | 0 | 0 |
| TR115856|c0_g3|m.13789 | Arabidopsis thaliana | AT3g07720/F17A17_6 | F17A17.6 | 19496 | 539.54 | 407.44 | 367.57 | 22.957 | 525.61 | 411.36 | 0 | 0 | 0 | 0 | 0 | 0 | 0 | 0 |
| TR115870|c0_g2|m.50096 | Mesembryanthemum crystallinum | Thylakoid-bound L-ascorbate peroxidase |  | 3486.7 | 158.98 | 136.28 |  |  |  |  | 0 | 0 | -1 | -1 | 0 | 0 | 0 | 0 |
| TR134969|c0_g2|m.48682 | Arabidopsis lyrata | Pentatricopeptide repeat-containing protein | ARALYDRAFT_494320 | 3005.3 |  | 12.026 |  |  | 74.234 | 96.413 | 0 | 0 | -1 | 0 | 1 | 0 | 0 | 0 |
| TR154938|c2_g1|m.12212 | Vitis vinifera | Putative uncharacterized protein | VIT_02s0012g00180 | 667.96 | 49.248 |  | 62.471 | 44.816 |  |  | 0 | 0 | 0 | -1 | -1 | 0 | 0 | 0 |
| TR136759|c0_g3|m.60667 | Populus trichocarpa | Predicted protein | POPTRDRAFT_732647 | 344.98 |  |  |  |  |  |  | 0 | 0 | 0 | 0 | 0 | 0 | 0 | 0 |
| TR163320|c0_g2|m.35370 | Mesembryanthemum crystallinum | Glucose-6P/phosphate translocator | GPT | 15257 | 132.14 | 204.06 | 177.19 | 146.16 | 131.66 |  | 0 | -1 | 0 | 0 | 0 | 0 | 0 | 0 |
| TR115893|c0_g1|m.11181 | Vitis vinifera | Putative uncharacterized protein | VIT_02s0025g03930 | 1486.1 |  |  | 7.2205 |  |  |  | 0 | 0 | 1 | 0 | -1 | 0 | 0 | 0 |
| TR115895|c0_g7|m.49510 | Solanum lycopersicum | Elongation factor Ts, mitochondrial (Precursor) | ER49 | 970.21 |  |  |  |  | 210.6 | 178.16 | 0 | 0 | 0 | 1 | 1 | 0 | 0 | 0 |
| TR138588|c1_g8|m.55132 | Arabidopsis thaliana | Putative uncharacterized protein | At3g19990 | 6185.3 | 32.111 | 80.759 | 69.6 | 138.55 |  |  | 0 | 0 | 0 | -1 | -1 | 0 | 0 | 0 |
| TR150276|c0_g3|m.34676 | Ricinus communis | Serine carboxypeptidase, putative | RCOM_1406210 | 3152.6 |  | 101.87 |  |  | 59.025 | 213.53 | 0 | 0 | -1 | 0 | 1 | 0 | 0 | 0 |
| TR116025|c0_g1|m.59206 | Vitis vinifera | Putative uncharacterized protein | VIT_02s0154g00080 | 14369 | 364.75 | 462.86 | 226.53 | 201.31 | 476.16 | 455.53 | 0 | 0 | 0 | 0 | 1 | 0 | 0 | 1 |
| TR124324|c0_g2|m.35366 | Vitis vinifera | Putative uncharacterized protein | VIT_13s0067g01510 | 10099 | 105.07 | 107.78 | 25.873 | 26.944 |  | 363.92 | 0 | 0 | -1 | 1 | 1 | -1 | 1 | 1 |
| TR116036|c0_g3|m.40430 | Glycine max | Proline iminopeptidase | Gma.18183 | 22533 | 387.52 | 457.38 | 222.04 | 246.72 | 1157.3 | 588.87 | 0 | 0 | -1 | 0 | 0 | -1 | 0 | 0 |
| TR116040|c0_g1|m.41496 | Vitis vinifera | Anthranilate synthase 02 |  | 5807.1 | 68.769 | 61.487 | 71.471 |  | 98.814 |  | 1 | 1 | 0 | 0 | 0 | 0 | 0 | 0 |
| TR89832|c0_g1|m.18166 | Ricinus communis | Signal recognition particle 54 kD protein, putative | RCOM_0901100 | 8178.1 |  |  | 64.988 | 3.6915 | 17.93 |  | 1 | 1 | 1 | 1 | 0 | 0 | 0 | 0 |
| TR137169|c2_g1|m.43564 | Ricinus communis | Putative uncharacterized protein | RCOM_0499370 | 2137.4 |  |  |  |  |  |  | 0 | 0 | 0 | 0 | 0 | 0 | 0 | 0 |
| TR116053|c0_g4|m.60787 | Beta vulgaris | Salt tolerance protein 1 | sato1 | 4551.5 | 77.245 | 92.438 | 105.87 | 65.881 | 392.76 |  | 0 | 0 | 0 | 1 | 0 | 0 | 1 | 0 |
| TR116056|c0_g2|m.37922 | Juglans regia | 3-dehydroquinate dehydratase/shikimate 5-dehydrogenase (Fragment) |  | 15025 | 269.96 | 206.03 | 25.936 | 40.134 | 796.99 | 702.36 | 0 | 0 | -1 | 1 | 1 | -1 | 1 | 1 |
| TR116060|c0_g6|m.9849 | Glycine max | Uncharacterized protein | Gma.27619 | 745.67 | 21.096 | 17.179 | 23.659 |  | 19.345 |  | 0 | 0 | 0 | 0 | 0 | 0 | 0 | 0 |
| TR116071|c0_g6|m.34902 | Glycine max | Uncharacterized protein | Gma.54356 | 19502 | 221.24 | 204.42 | 148.48 | 58.903 | 397.94 | 379.53 | 0 | 0 | 0 | 1 | 1 | 0 | 1 | 1 |
| TR130245|c0_g9|m.34273 | Vitis vinifera | Glycylpeptide N-tetradecanoyltransferase | VIT_09s0002g01770 | 4685.4 | 99.604 | 135.26 | 34.441 | 29.989 | 94.928 | 49.969 | 0 | 0 | -1 | 0 | 0 | -1 | 0 | 0 |
| TR116091|c0_g4|m.22869 | Vitis vinifera | Putative uncharacterized protein | VIT_04s0008g03100 | 5419.2 |  |  |  |  |  |  | 0 | 0 | 0 | 0 | 0 | 0 | 0 | 0 |
| TR131570|c0_g2|m.21342 | Vitis vinifera | Putative uncharacterized protein | VIT_05s0020g01320 | 3740.1 | 70.278 | 90.278 | 88.86 | 30.561 | 154.39 | 86.401 | 0 | 0 | 0 | 0 | 0 | 0 | 0 | 0 |
| TR116376|c0_g2|m.28836 | Suaeda salsa | Putative vacuolar ATPase subunit H protein |  | 287130 | 3299.1 | 3551.9 | 1775.7 | 1434.4 | 7108.1 | 8014.2 | 0 | 0 | -1 | 1 | 1 | -1 | 1 | 1 |
| TR116390|c0_g3|m.60415 | Vitis vinifera | Putative uncharacterized protein | VIT_14s0081g00150 | 1630.8 |  |  | 29.719 |  |  |  | 0 | 0 | 1 | 0 | -1 | 0 | 0 | 0 |
| TR116394|c0_g2|m.23134 | Vitis vinifera | Putative uncharacterized protein | VIT_14s0128g00050 | 2401.5 | 38.505 | 55.084 |  |  | 90.087 |  | 0 | 0 | -1 | 0 | 1 | 0 | 0 | 0 |
| TR116394|c0_g2|m.23135 | Vitis vinifera | Putative uncharacterized protein | VIT_14s0128g00050 | 60062 | 706.21 | 757.19 | 940.24 | 368.68 | 909.29 | 832.16 | 0 | 0 | 0 | 0 | 0 | 0 | 0 | 0 |
| TR116397|c0_g2|m.30682 | Glycine max | Uncharacterized protein |  | 1874.8 | 13.115 | 10.792 | 174.65 | 144.15 |  |  | 0 | 0 | 1 | -1 | -1 | 1 | 0 | 0 |
| TR93654|c0_g2|m.19642 | Ricinus communis | 3-isopropylmalate dehydratase, putative | RCOM_1217310 | 1194 | 20.135 | 25.643 | 18.85 |  |  | 59.794 | 0 | 0 | 0 | 0 | 0 | 0 | 0 | 0 |
| TR3790|c0_g1|m.2705 | Vitis vinifera | Putative uncharacterized protein | VIT_03s0017g01490 | 298.18 | 19.872 |  | 13.751 |  |  |  | 0 | -1 | 0 | -1 | -1 | 0 | 0 | 0 |
| TR116406|c1_g5|m.57071 | Glycine max | Uncharacterized protein | Gma.1425 | 2779.6 | 4.8384 |  | 12.581 | 66.604 | 215.24 | 216.41 | 1 | 1 | 0 | 1 | 1 | 0 | 1 | 1 |
| TR116413|c0_g5|m.163 | Vitis pseudoreticulata | Aldehyde dehydrogenase | ALDH2a | 485.46 |  |  |  |  |  |  | 0 | 0 | 0 | 0 | 0 | 0 | 0 | 0 |
| TR116416|c0_g1|m.27483 | Ricinus communis | Chloroplast inner envelope protein, putative | RCOM_0990980 | 3795 | 159.03 | 58.013 | 81.731 | 64.098 |  |  | 0 | -1 | 0 | -1 | -1 | 0 | 0 | 0 |
| TR163343|c0_g2|m.18070 | Vitis vinifera | Putative uncharacterized protein | VIT_00s0179g00300 | 9460 | 119.62 | 196.07 | 240.28 | 219.04 | 113.86 | 108.38 | 0 | 0 | 0 | 0 | -1 | 0 | 0 | -1 |
| TR116420|c0_g4|m.41930 | Vitis vinifera | Putative uncharacterized protein | VIT_04s0008g03680 | 7693 |  |  |  |  | 435.92 | 460.27 | 0 | 0 | 0 | 1 | 1 | 0 | 0 | 0 |
| TR116421|c1_g2|m.22595 | Ricinus communis | Endomembrane protein emp70, putative | RCOM_0321070 | 1042.8 |  |  | 77.323 |  |  |  | 0 | 0 | 1 | 0 | -1 | 0 | 0 | 0 |
| TR117218|c0_g3|m.62255 | Vitis vinifera | Putative uncharacterized protein | VIT_14s0083g00960 | 106.18 | 5.0324 |  | 2.4078 | 0.99438 |  |  | 0 | -1 | 0 | -1 | -1 | 0 | 0 | 0 |
| TR117233|c211_g36|m.10456 | Cactus virus X | Capsid protein | cp | 311190 | 1000.6 | 1285.5 |  |  | 7503.6 | 6450.3 | 0 | 0 | -1 | 1 | 1 | 0 | 1 | 0 |
| TR153891|c214_g5|m.49121 | Cactus virus X | 25 kDa protein |  | 64412 | 1130.3 | 1260.1 | 128.24 | 176.93 | 3604.7 | 3990.6 | 0 | 0 | -1 | 1 | 1 | -1 | 1 | 1 |
| TR117256|c1_g12|m.9417 | Nandina domestica | Short chain dehydrogenase/reductase |  | 1475.8 | 23.676 |  |  |  |  |  | 0 | 0 | -1 | -1 | 0 | 0 | 0 | 0 |
| TR117256|c1_g4|m.47238 | Medicago truncatula | (+)-neomenthol dehydrogenase | MTR_7g076660 | 84662 | 808.41 | 130.56 | 227.23 | 165.41 | 3506.6 | 3717.2 | 0 | 0 | 0 | 1 | 1 | 0 | 1 | 1 |
| TR117261|c1_g1|m.53304 | Lotus japonicus | Proteasome subunit beta type |  | 8326.3 |  |  |  |  |  |  | 0 | 0 | 0 | 0 | 0 | 0 | 0 | 0 |
| TR117271|c1_g1|m.53271 | Arabidopsis lyrata | Fructosamine kinase family protein | ARALYDRAFT_486578 | 7881.9 | 337.87 | 136.83 | 247.75 | 235.06 |  |  | 0 | 0 | 0 | -1 | -1 | 0 | 0 | 0 |
| TR117294|c0_g12|m.33003 | Glycine max | Uncharacterized protein | Gma.48868 | 6097.4 | 142.14 | 65.903 | 48.298 | 33.442 | 58.993 | 83.084 | 0 | 0 | 0 | 0 | 0 | 0 | 0 | 0 |
| TR117297|c0_g3|m.37644 | Vitis vinifera | Putative uncharacterized protein | VIT_18s0001g01490 | 10493 | 234.17 | 201.13 | 102.66 | 88.037 |  | 84.502 | 0 | -1 | -1 | 0 | 0 | -1 | 0 | 0 |
| TR117309|c1_g2|m.32507 | Sorghum bicolor | Malate dehydrogenase | Sb03g029570 | 127640 | 1294.9 | 1213.8 | 348.83 | 325.15 | 3359.8 | 3975.1 | 0 | 0 | -1 | 1 | 1 | -1 | 1 | 1 |
| TR117312|c0_g4|m.35973 | Populus trichocarpa | S-adenosylmethionine synthetase 4 | AdoMet4 | 17652 | 70.074 | 46.576 | 153.77 | 130.77 |  | 124.37 | 0 | 0 | 1 | 0 | 0 | 1 | 0 | 0 |
| TR117318|c3_g11|m.7635 | Opuntia streptacantha | Dehydrin 1 | dhn1 | 15227 |  |  |  |  |  |  | 0 | 0 | 0 | 0 | 0 | 0 | 0 | 0 |
| TR117318|c2_g4|m.40004 | Opuntia streptacantha | Dehydrin 1 | dhn1 | 541870 | 5511.5 | 5752.4 | 10135 | 8215.6 | 11586 | 9682.6 | 1 | 1 | 0 | 1 | 0 | 0 | 1 | 0 |
| TR128332|c1_g1|m.36243 | Vitis vinifera | Putative uncharacterized protein | VIT_14s0108g00870 | 1987 |  |  |  |  |  |  | 0 | 0 | 0 | 0 | 0 | 0 | 0 | 0 |
| TR117323|c0_g8|m.4629 | Vitis vinifera | Putative uncharacterized protein | VIT_17s0000g10250 | 20806 | 415.76 | 377.91 | 356.85 | 287.17 | 366.26 | 265.85 | 0 | -1 | 0 | 0 | 0 | 0 | 0 | 0 |
| TR117329|c0_g4|m.7437 | Glycine max | Uncharacterized protein |  | 2768.3 |  |  | 32.272 | 6.2162 |  |  | 0 | 0 | 1 | 0 | -1 | 0 | 0 | 0 |
| TR117582|c0_g3|m.761 | Mesembryanthemum crystallinum | Glycolate oxidase | GOX | 3946.7 |  | 33.795 | 14.249 |  | 200.8 | 135.05 | 0 | 0 | 0 | 0 | 0 | 0 | 0 | 0 |
| TR130857|c0_g2|m.49847 | Ricinus communis | T-complex protein 1 subunit alpha | RCOM_1276510 | 8973.4 | 21.724 | 32.27 | 109.89 | 43.618 | 282.42 | 253.25 | 1 | 1 | 0 | 1 | 1 | 0 | 1 | 1 |
| TR138620|c0_g12|m.48305 | Vitis vinifera | Putative uncharacterized protein | VIT_02s0025g00640 | 3372.9 | 25.361 |  |  |  |  |  | 0 | 0 | -1 | -1 | 0 | 0 | 0 | 0 |
| TR84776|c0_g11|m.5956 | Arabidopsis lyrata | Putative uncharacterized protein | ARALYDRAFT_482251 | 19015 | 232.92 | 204 | 116.11 | 91.934 | 189.49 | 346.3 | 0 | 0 | -1 | 0 | 0 | -1 | 0 | 0 |
| TR117614|c0_g6|m.28647 | Arabidopsis lyrata | Putative uncharacterized protein | ARALYDRAFT_482251 | 6978.8 |  |  |  | 140.19 |  | 501.39 | 1 | 1 | 1 | 1 | 0 | 0 | 0 | 0 |
| TR31632|c1_g1|m.34154 | Glycine max | Putative uncharacterized protein |  | 314.73 | 41.585 |  | 37.774 |  |  |  | 0 | -1 | 0 | -1 | -1 | 0 | 0 | 0 |
| TR117627|c0_g1|m.29467 | Glycine max | Uncharacterized protein | Gma.2877 | 6194.3 |  |  |  |  |  |  | 0 | 0 | 0 | 0 | 0 | 0 | 0 | 0 |
| TR117627|c2_g7|m.22735 | Sesuvium portulacastrum | Phosphoenolpyruvate carboxylase | PEPC | 351.67 |  |  |  |  |  |  | 0 | 0 | 0 | 0 | 0 | 0 | 0 | 0 |
| TR117643|c3_g1|m.21362 | Ricinus communis | Isopropylmalate synthase, putative | RCOM_1267040 | 679.63 |  |  |  |  |  |  | 0 | 0 | 0 | 0 | 0 | 0 | 0 | 0 |
| TR117643|c3_g2|m.56176 | Ricinus communis | Isopropylmalate synthase, putative | RCOM_1267040 | 3092.3 |  |  |  |  | 91.062 | 54.482 | 0 | 0 | 0 | 1 | 1 | 0 | 0 | 0 |
| TR133674|c0_g1|m.18644 | Gossypium hirsutum | Aspartate aminotransferase |  | 960.64 |  |  |  |  | 56.399 | 37.788 | 0 | 0 | 0 | 1 | 1 | 0 | 0 | 0 |
| TR117653|c7_g6|m.9446 | Beta vulgaris | Actin |  | 339100 | 3244.3 | 2795.3 | 4495.1 | 3563.4 | 6712.6 | 7508.5 | 1 | 1 | 0 | 1 | 1 | 0 | 1 | 1 |
| TR117672|c0_g4|m.19674 | Vitis vinifera | Putative uncharacterized protein | VIT_13s0019g03470 | 4579.8 |  |  |  | 2.0584 | 74.324 |  | 1 | 1 | 1 | 1 | 0 | 0 | 0 | 0 |
| TR118433|c0_g4|m.5873 | Lotus japonicus | Uncharacterized protein |  | 8333.1 | 201.9 | 371.25 | 322.19 | 175.82 | 389.13 |  | 0 | 0 | 0 | 0 | 0 | 0 | 0 | 0 |
| TR118443|c0_g1|m.13819 | Vitis vinifera | Putative uncharacterized protein | VIT_04s0023g01300 | 3893.2 |  |  |  | 40.267 | 120.13 |  | 1 | 1 | 1 | 1 | 0 | 0 | 0 | 0 |
| TR154240|c2_g1|m.12633 | Vitis vinifera | Putative uncharacterized protein | VIT_04s0008g07110 | 12915 | 76.227 |  | 28.442 | 13.355 |  |  | 0 | -1 | 0 | -1 | -1 | 0 | 0 | 0 |
| TR118449|c0_g8|m.12299 | Ricinus communis | Calcium-binding protein, putative | RCOM_1144940 | 1109 |  | 38.594 | 48.144 | 47.25 |  |  | 0 | 0 | 0 | -1 | -1 | 0 | 0 | 0 |
| TR118451|c0_g4|m.57227 | Nandina domestica | Short chain dehydrogenase/reductase |  | 10271 | 99.418 | 36.046 | 116.9 | 194.76 | 172.02 |  | 1 | 1 | 0 | 0 | 0 | 0 | 0 | 0 |
| TR118455|c0_g1|m.58172 | Vitis vinifera | Putative uncharacterized protein | VIT_01s0026g01660 | 15390 | 236.53 | 113.94 | 144.02 | 57.614 | 350.71 | 212.3 | 0 | 0 | 0 | 0 | 0 | 0 | 0 | 0 |
| TR118457|c0_g10|m.25750 | Vitis vinifera | Putative uncharacterized protein | VIT_02s0025g01170 | 1463.6 |  |  |  |  |  |  | 0 | 0 | 0 | 0 | 0 | 0 | 0 | 0 |
| TR118457|c0_g22|m.52427 | Populus trichocarpa | Predicted protein | POPTRDRAFT_640386 | 847.82 | 49.378 |  | 78.85 |  |  |  | 0 | 0 | 0 | -1 | -1 | 0 | 0 | 0 |
| TR118459|c0_g5|m.53933 | Mesembryanthemum crystallinum | Putative vacuolar ATPase subunit 100 kDa subunit | vpha-a | 144200 | 2105.5 | 2266.6 | 1366.5 | 903.22 | 5013.6 | 5616.2 | 0 | 0 | 0 | 1 | 1 | 0 | 1 | 1 |
| TR98875|c0_g6|m.52141 | Nicotiana sylvestris | ATP synthase subunit beta | nsatp2.2.1 | 507230 | 4429.7 | 5096.1 | 1203.7 | 907.7 | 16566 | 10782 | 0 | 0 | -1 | 0 | 1 | -1 | 0 | 1 |
| TR118463|c0_g11|m.6523 | Vitis vinifera | ATP synthase subunit beta | VITISV_018718 | 700480 | 7980.8 | 8765.9 | 8261.5 | 7356.9 | 17957 | 18612 | 0 | 0 | 0 | 1 | 1 | 0 | 1 | 1 |
| TR118463|c0_g6|m.53285 | Oryza sativa | ATP synthase subunit beta | OsI_20905 | 8083.4 | 251.34 | 199.41 | 122.35 | 58.248 | 93.796 | 93.086 | 0 | 0 | 0 | -1 | 0 | 0 | -1 | 0 |
| TR118472|c0_g1|m.52894 | Vitis vinifera | Putative uncharacterized protein | VIT_07s0129g00490 | 32303 | 980.59 | 1014.4 | 418.06 | 372.17 | 451.86 | 444.69 | 0 | 0 | -1 | -1 | 0 | -1 | -1 | 0 |
| TR118474|c0_g4|m.28395 | Glycine max | Uncharacterized protein | Gma.36740 | 2881.3 | 57.794 | 111.5 | 11.421 |  |  | 129.01 | 0 | 0 | 0 | 0 | 0 | 0 | 0 | 0 |
| TR118485|c0_g2|m.30434 | Spinacia oleracea | Cysteine protease | SoCP3-41 | 32830 | 258.23 | 324.08 | 166.01 | 303.28 | 197.67 | 360 | 0 | 0 | 0 | 0 | 0 | 0 | 0 | 0 |
| TR118499|c0_g1|m.17220 | Nicotiana tabacum | Phenylcoumaran benzylic ether reductase | TP7 | 78773 | 622.83 | 1060.6 | 331.01 | 825.23 | 1556.3 | 1678.6 | 0 | 0 | 0 | 0 | 0 | 0 | 0 | 0 |
| TR118499|c0_g11|m.45086 | Vitis vinifera | Isoflavone reductase-like protein 5 | ifrl5 | 77341 | 268.61 |  | 322.06 | 89.905 | 3417.1 | 3162.2 | 0 | 0 | 0 | 1 | 1 | 0 | 1 | 1 |
| TR118499|c0_g3|m.12316 | Nicotiana tabacum | Phenylcoumaran benzylic ether reductase | TP7 | 23554 | 349.55 | 398.07 | 200.38 | 125.84 | 246.53 |  | 0 | 0 | -1 | 0 | 0 | -1 | 0 | 0 |
| TR118511|c1_g1|m.4836 | Vitis vinifera | Mitochondrial Rho GTPase | VIT_14s0128g00400 | 14701 | 265.79 | 303.08 | 316 | 227.88 | 290.6 | 242.91 | 0 | -1 | 0 | 0 | 0 | 0 | 0 | 0 |
| TR85652|c1_g2|m.20007 | Vitis vinifera | Putative uncharacterized protein | VIT_17s0053g00680 | 9169.7 | 100.76 | 61.792 | 81.071 | 52.409 | 217.09 | 253.47 | 0 | 0 | 0 | 1 | 1 | 0 | 1 | 1 |
| TR118989|c0_g1|m.20275 | Tetragonia tetragonoides | Putative luminal binding protein 7B4 (Fragment) |  | 1114.6 |  |  |  | 4.6707 | 15.562 |  | 1 | 1 | 1 | 1 | 0 | 0 | 0 | 0 |
| TR118991|c2_g1|m.50930 | Hieracium pilosella | Glycosyltransferase UGT88A8 |  | 9245.1 |  |  | 51.296 |  | 75.515 | 226.76 | 1 | 1 | 1 | 1 | 0 | 0 | 0 | 0 |
| TR119000|c0_g7|m.19613 | Vitis vinifera | Putative uncharacterized protein | VITISV_006765 | 12347 | 147.73 | 101.7 | 59.898 | 77.413 | 449.43 | 413.46 | 0 | 0 | 0 | 1 | 1 | 0 | 1 | 1 |
| TR119012|c0_g3|m.15398 | Vitis vinifera | Putative uncharacterized protein | VIT_01s0011g00400 | 1341.1 |  |  |  |  |  |  | 0 | 0 | 0 | 0 | 0 | 0 | 0 | 0 |
| TR119015|c0_g1|m.47522 | Vitis vinifera | Putative uncharacterized protein | VIT_14s0108g01650 | 44729 | 715.91 | 659.24 | 466.17 | 350.96 | 1437.7 | 513.98 | 0 | 0 | -1 | 0 | 0 | -1 | 0 | 0 |
| TR163954|c1_g7|m.54501 | Suaeda salsa | Carotenoid cleavage dioxygenase | CCD1 | 12017 | 411.42 | 324.11 | 52.779 | 104.78 | 57.832 | 358.07 | 0 | 0 | -1 | 0 | 0 | -1 | 0 | 0 |
| TR163954|c1_g4|m.30141 | Suaeda salsa | Carotenoid cleavage dioxygenase | CCD1 | 5792.7 | 336.57 | 349.06 | 235.19 |  |  | 253.24 | 0 | 0 | 0 | 0 | 0 | 0 | 0 | 0 |
| TR132993|c0_g1|m.31400 | Glycine max | Uncharacterized protein | Gma.20815 | 367.39 |  |  |  |  |  |  | 0 | 0 | 0 | 0 | 0 | 0 | 0 | 0 |
| TR159671|c0_g2|m.7694 | Vitis vinifera | Putative uncharacterized protein | VIT_03s0038g01480 | 309.59 | 14.221 |  |  | 23.006 |  |  | 0 | 0 | 0 | -1 | -1 | 0 | 0 | 0 |
| TR119064|c0_g3|m.31691 | Vitis vinifera | Putative uncharacterized protein | VIT_07s0129g00490 | 1235.6 | 57.398 | 80.696 |  | 43.729 |  |  | 0 | -1 | 0 | -1 | -1 | 0 | 0 | 0 |
| TR119068|c0_g3|m.9487 | Elaeis guineensis | Isocitrate dehydrogenase [NADP] |  | 3297.4 |  |  |  |  |  |  | 0 | 0 | 0 | 0 | 0 | 0 | 0 | 0 |
| TR134545|c0_g2|m.5652 | Vitis vinifera | Putative uncharacterized protein | VIT_08s0007g03390 | 9080.7 | 129.78 | 112.4 | 33.619 | 17.888 | 417.98 | 216.52 | 0 | 0 | -1 | 0 | 0 | -1 | 0 | 0 |
| TR119079|c0_g3|m.39975 | Glycine max | Uncharacterized protein | Gma.1323 | 3388.3 | 95.97 | 34.69 | 21.634 |  | 144.5 |  | 0 | 0 | 0 | 0 | 0 | 0 | 0 | 0 |
| TR119085|c0_g4|m.1564 | Vitis vinifera | Putative uncharacterized protein | VIT_17s0000g07190 | 86112 | 606.7 | 816.17 | 633.7 | 412.48 | 2238.5 | 2698 | 0 | 0 | 0 | 1 | 1 | 0 | 1 | 1 |
| TR119762|c0_g2|m.38508 | Glycine max | Uncharacterized protein | Gma.55161 | 136110 | 1561.6 | 2187.4 | 3176.9 | 2882.4 | 1862.5 | 1985.5 | 0 | 0 | 0 | 0 | -1 | 0 | 0 | -1 |
| TR99610|c0_g1|m.6585 | Vitis vinifera | Putative uncharacterized protein | VIT_13s0019g04190 | 5556.3 | 187.82 | 247.62 | 49.274 |  | 249.25 | 39.354 | 0 | 0 | 0 | 0 | 0 | 0 | 0 | 0 |
| TR119778|c0_g3|m.13543 | Glycine max | Uncharacterized protein | Gma.4668 | 7445.5 | 210.5 | 134.28 | 93.525 | 116.5 | 745.98 | 186.35 | 0 | 0 | 0 | 0 | 0 | 0 | 0 | 0 |
| TR119780|c0_g1|m.21592 | Populus trichocarpa | Predicted protein | POPTRDRAFT_711240 | 4779.9 | 97.341 | 119.2 | 56.995 | 58.483 | 263.15 | 274.63 | 0 | 0 | -1 | 1 | 1 | -1 | 1 | 1 |
| TR119783|c0_g3|m.62733 | Vitis vinifera | Putative uncharacterized protein | VIT_06s0004g07130 | 14538 | 38.942 | 6.0699 |  | 24.736 | 577.89 | 373.62 | 1 | 1 | 0 | 1 | 0 | 0 | 1 | 0 |
| TR99549|c0_g4|m.1298 | Gossypium hirsutum | Serine hydroxymethyltransferase |  | 98455 | 805.21 | 550.56 | 825.8 | 668.21 | 3724.2 | 3307.9 | 1 | 1 | 0 | 1 | 1 | 0 | 1 | 1 |
| TR119800|c0_g1|m.50318 | Populus trichocarpa | Predicted protein | POPTRDRAFT_1080468 | 10948 | 122.37 |  |  | 137.36 |  |  | 0 | 0 | 0 | -1 | -1 | 0 | 0 | 0 |
| TR119815|c1_g1|m.23616 | Gomphrena globosa | Sinapate glucosyltransferase | SGT | 21298 | 289.53 |  | 206.86 | 165.55 | 927.82 | 984.13 | 0 | 0 | 0 | 1 | 1 | 0 | 1 | 1 |
| TR119821|c0_g5|m.51402 | Populus trichocarpa | Predicted protein | POPTRDRAFT_827863 | 1160.6 |  |  |  | 10.049 |  |  | 0 | 0 | 1 | 0 | -1 | 0 | 0 | 0 |
| TR119825|c0_g1|m.32571 | Ricinus communis | ATP-dependent transporter, putative | RCOM_0894930 | 5928.1 | 201.98 | 162.49 | 31.625 | 60.551 | 219.96 |  | 0 | 0 | -1 | 0 | 0 | -1 | 0 | 0 |
| TR126653|c1_g4|m.14264 | Vitis vinifera | Putative uncharacterized protein | VIT_11s0016g03440 | 62627 | 1355.3 | 1343.6 | 828.08 | 842.32 | 1378.6 | 1488.5 | 0 | 0 | -1 | 0 | 1 | -1 | 0 | 1 |
| TR119833|c0_g1|m.52804 | Glycine max | Elongation factor Ts |  | 24482 | 639.5 | 627.94 | 161.9 | 122.74 | 561.56 | 741.83 | 0 | 0 | -1 | 0 | 1 | -1 | 0 | 1 |
| TR119836|c0_g3|m.43367 | Vitis vinifera | Putative uncharacterized protein | VIT_01s0011g05370 | 19188 | 260.04 | 136.56 | 74.108 | 12.034 | 1160.8 | 1138.8 | 0 | 0 | 0 | 1 | 1 | 0 | 1 | 1 |
| TR132709|c0_g4|m.28452 | Ricinus communis | Protein-L-isoaspartate O-methyltransferase | RCOM_1508020 | 937.1 |  | 28.399 | 57.395 | 49.74 |  |  | 0 | 0 | 0 | -1 | -1 | 0 | 0 | 0 |
| TR119837|c0_g2|m.61407 | Populus trichocarpa | Protein-L-isoaspartate O-methyltransferase | POPTRDRAFT_733451 | 22133 | 673.4 | 660.78 | 135.25 | 245.03 | 506.44 | 943.97 | 0 | 0 | -1 | 0 | 0 | -1 | 0 | 0 |
| TR119840|c0_g1|m.7251 | Ricinus communis | Arginine/serine-rich splicing factor, putative | RCOM_1178020 | 15653 | 113.38 | 135.59 | 46.596 | 51.925 |  | 146.35 | 0 | 0 | -1 | 0 | 1 | -1 | 0 | 1 |
| TR119848|c2_g5|m.59346 | Spinacia oleracea | Glutamine synthetase | GS1 | 234760 | 2333.7 | 3847.4 | 847.92 | 991.56 | 1459 | 3027.1 | 0 | 0 | 0 | 0 | 0 | 0 | 0 | 0 |
| TR120794|c0_g2|m.37577 | Spinacia oleracea | Putative phosphofructokinase |  | 13127 | 33.028 | 113.21 | 139.21 | 106.84 | 104.83 | 345.4 | 1 | 1 | 0 | 0 | 0 | 0 | 0 | 0 |
| TR120798|c0_g14|m.35030 | Ricinus communis | NADH-plastoquinone oxidoreductase, putative | RCOM_0798140 | 21652 | 229.63 | 189.66 | 59.513 | 41.983 | 423.5 | 549.49 | 0 | 0 | -1 | 0 | 1 | -1 | 0 | 1 |
| TR88292|c0_g1|m.12176 | Vitis vinifera | Putative uncharacterized protein | VIT_07s0005g03490 | 3366 |  | 73.329 |  |  | 283.46 |  | 0 | 0 | -1 | 0 | 1 | 0 | 0 | 0 |
| TR129982|c2_g1|m.56226 | Ricinus communis | Methionine sulfoxide reductase, putative | RCOM_0816980 | 9546.4 |  |  |  | 95.179 | 491.08 | 609.8 | 1 | 1 | 1 | 1 | 0 | 0 | 0 | 0 |
| TR85346|c2_g4|m.60041 | Hevea brasiliensis | 40S ribosomal protein S12 | RPS12A | 30535 | 630.04 | 477.48 | 594.79 | 432.89 | 198.52 | 202.52 | 0 | -1 | 0 | -1 | 0 | 0 | -1 | 0 |
| TR120831|c0_g5|m.7615 | Ricinus communis | Proteasome subunit beta type | RCOM_0205360 | 37462 | 517.33 | 650.63 | 306.37 | 263.36 | 794.57 | 771.65 | 0 | 0 | 0 | 0 | 1 | 0 | 0 | 1 |
| TR120832|c0_g2|m.25171 | Vitis vinifera | Malate dehydrogenase | VIT_03s0088g01190 | 24476 | 119.1 | 146.74 |  |  |  |  | 0 | 0 | -1 | -1 | 0 | 0 | 0 | 0 |
| TR120845|c0_g6|m.4378 | Ricinus communis | Proteasome subunit beta type | RCOM_0205360 | 118.11 |  |  |  |  |  |  | 0 | 0 | 0 | 0 | 0 | 0 | 0 | 0 |
| TR120848|c3_g1|m.57477 | Populus trichocarpa | Predicted protein | POPTRDRAFT_1072847 | 3108 |  | 62.434 | 122.99 | 108.05 | 162.91 |  | 1 | 1 | 0 | 0 | 0 | 0 | 0 | 0 |
| TR9614|c1_g3|m.44907 | Glycine max | Uncharacterized protein | Gma.827 | 8488.4 | 108.25 | 191.29 | 46.51 | 110.96 | 81.439 | 96.075 | 0 | 0 | 0 | 0 | 0 | 0 | 0 | 0 |
| TR120852|c0_g5|m.45288 | Tamarix androssowii | Ubiquitin-conjugating enzyme family protein |  | 3212.2 |  |  |  | 56.69 |  |  | 0 | 0 | 1 | 0 | -1 | 0 | 0 | 0 |
| TR120853|c0_g3|m.51401 | Vitis vinifera | Putative uncharacterized protein | VIT_04s0008g01910 | 4510.9 | 311.56 | 342.11 | 178.18 | 176.61 |  |  | 0 | -1 | -1 | -1 | -1 | -1 | 0 | 0 |
| TR120874|c3_g1|m.14876 | Sesuvium portulacastrum | Salt tolerance protein III | SRTG152-III | 2401.3 |  |  |  |  |  |  | 0 | 0 | 0 | 0 | 0 | 0 | 0 | 0 |
| TR3661|c0_g1|m.46521 | Arabidopsis thaliana | Putative uncharacterized protein |  | 41240 | 842.67 | 448.34 | 98.565 | 98.338 | 1010.4 | 888.08 | 0 | 0 | 0 | 0 | 1 | 0 | 0 | 1 |
| TR120883|c1_g1|m.11747 | Populus trichocarpa | Predicted protein | POPTRDRAFT_721040 | 12459 | 121.22 | 255.94 | 192.38 | 269.73 | 534.71 | 574.64 | 1 | 1 | 0 | 1 | 1 | 0 | 1 | 1 |
| TR121236|c0_g1|m.29224 | Vitis vinifera | Putative uncharacterized protein | VIT_05s0020g03080 | 2510.2 | 56.12 |  |  | 20.387 |  | 74.843 | 0 | 0 | 0 | 0 | 0 | 0 | 0 | 0 |
| TR121242|c0_g13|m.10051 | Coffea canephora | Plastid fibrillin 2 (Fragment) | FIB2 | 1696.4 |  |  | 37.548 | 43.439 |  |  | 0 | 0 | 1 | 0 | -1 | 0 | 0 | 0 |
| TR121245|c0_g3|m.38640 | Vitis vinifera | Putative uncharacterized protein | VIT_09s0018g01600 | 16014 | 702.44 | 944.17 | 242.73 |  | 884.26 | 67.52 | 0 | 0 | 0 | 0 | 0 | 0 | 0 | 0 |
| TR152822|c0_g3|m.14835 | Ricinus communis | Putative uncharacterized protein | RCOM_1442660 | 2676.4 | 17.66 |  | 33.994 | 39.962 |  | 313.87 | 1 | 1 | 0 | 0 | 1 | 0 | 0 | 1 |
| TR121248|c1_g11|m.62555 | Vitis vinifera | Putative uncharacterized protein | VIT_02s0025g04050 | 1550.2 |  | 23.384 | 20.915 | 21.91 |  |  | 0 | -1 | 0 | -1 | -1 | 0 | 0 | 0 |
| TR121254|c0_g1|m.42858 | Glycine max | Uncharacterized protein | Gma.25384 | 6225.4 | 40.6 | 47.752 | 35.562 | 28.608 | 382.46 | 412.9 | 0 | 0 | 0 | 1 | 1 | 0 | 1 | 1 |
| TR121254|c1_g7|m.12269 | Vitis vinifera | Putative uncharacterized protein | VIT_02s0025g00640 | 65096 | 1171.8 | 2213.8 | 2167.9 | 1083.5 | 1580.8 | 1171.8 | 0 | -1 | 0 | 0 | 0 | 0 | 0 | 0 |
| TR121263|c2_g10|m.59920 | Populus trichocarpa | Predicted protein | POPTRDRAFT_827863 | 3638.7 |  |  |  |  |  |  | 0 | 0 | 0 | 0 | 0 | 0 | 0 | 0 |
| TR121263|c2_g13|m.62934 | Populus trichocarpa | Predicted protein | POPTRDRAFT_827863 | 24388 | 74.442 | 183.4 | 36.218 | 42.278 | 2335.6 | 675.13 | 0 | 0 | 0 | 0 | 0 | 0 | 0 | 0 |
| TR121273|c0_g15|m.7086 | Vitis vinifera | Putative uncharacterized protein | VITISV_028234 | 4874.5 |  |  |  |  |  |  | 0 | 0 | 0 | 0 | 0 | 0 | 0 | 0 |
| TR121273|c0_g31|m.419 | Vitis vinifera | Putative uncharacterized protein | VIT_01s0011g04720 | 1176.9 |  |  |  |  |  |  | 0 | 0 | 0 | 0 | 0 | 0 | 0 | 0 |
| TR121274|c0_g3|m.30021 | Vitis vinifera | Putative uncharacterized protein | VIT_11s0016g04950 | 836.16 |  | 13.437 |  |  |  |  | 0 | 0 | -1 | -1 | 0 | 0 | 0 | 0 |
| TR121278|c0_g3|m.43724 | Vitis vinifera | Putative uncharacterized protein | VIT_18s0001g11100 | 118740 | 3701.4 | 3043.3 | 1246.7 |  |  |  | 0 | -1 | 0 | -1 | -1 | 0 | 0 | 0 |
| TR164529|c1_g9|m.58079 | Vitis vinifera | Putative uncharacterized protein | VIT_18s0001g11100 | 9286.7 |  |  | 419.31 |  |  |  | 0 | 0 | 1 | 0 | -1 | 0 | 0 | 0 |
| TR121283|c0_g2|m.55816 | Vitis vinifera | Putative uncharacterized protein | VITISV_015334 | 1536.7 | 80.526 |  |  |  |  |  | 0 | 0 | -1 | -1 | 0 | 0 | 0 | 0 |
| TR121286|c1_g4|m.60394 | Vitis vinifera | Putative uncharacterized protein | VIT_17s0000g02290 | 2389.7 |  |  |  |  |  |  | 0 | 0 | 0 | 0 | 0 | 0 | 0 | 0 |
| TR122477|c0_g4|m.15791 | Populus trichocarpa | Predicted protein | POPTRDRAFT_705748 | 4857.1 |  |  |  | 22.192 |  | 518.47 | 1 | 1 | 1 | 1 | 0 | 0 | 0 | 0 |
| TR121304|c0_g4|m.40291 | Vitis vinifera | Putative uncharacterized protein | VIT_08s0007g07070 | 19578 | 94.188 | 100.08 | 150.41 | 146.59 | 284.32 | 266.71 | 1 | 1 | 1 | 1 | 1 | 1 | 1 | 1 |
| TR121314|c0_g2|m.21570 | Ricinus communis | Alpha-n-acetylglucosaminidase, putative | RCOM_0964740 | 1604.1 |  |  |  |  |  |  | 0 | 0 | 0 | 0 | 0 | 0 | 0 | 0 |
| TR121613|c0_g1|m.33777 | Ricinus communis | Glucose-1-phosphate adenylyltransferase | RCOM_1212050 | 156730 | 1417.3 | 1175.6 | 765.51 | 567.45 | 4145.9 | 3248.8 | 0 | 0 | 0 | 1 | 1 | 0 | 1 | 1 |
| TR121614|c1_g2|m.62559 | Hevea brasiliensis | DEAD box RNA helicase RH2a (Fragment) |  | 1515.3 | 26.839 | 6.9378 |  |  |  | 110.16 | 0 | 0 | -1 | 0 | 1 | 0 | 0 | 0 |
| TR121617|c0_g2|m.18302 | Fagus sylvatica | Putative 3-dehydroquinate synthase |  | 4029.5 | 149.66 | 131.98 | 54.66 | 38.691 |  |  | 0 | -1 | -1 | -1 | -1 | -1 | 0 | 0 |
| TR121642|c0_g1|m.27159 | Camellia sinensis | Fatty acid hydroperoxide lyase |  | 3413.8 | 77.579 | 78.593 | 33.971 | 37.829 |  | 29.462 | 0 | -1 | -1 | -1 | 0 | -1 | -1 | 0 |
| TR121643|c0_g1|m.30771 | Vitis vinifera | Putative uncharacterized protein | VIT_14s0128g00480 | 19609 | 180.93 | 371.59 | 223.51 | 312.15 |  | 383.79 | 1 | 1 | 0 | 0 | 0 | 0 | 0 | 0 |
| TR121647|c0_g1|m.35190 | Glycine max | Putative uncharacterized protein |  | 33127 | 439.21 | 486.26 | 529.12 | 343.35 | 497.69 | 543.64 | 0 | 0 | 0 | 0 | 0 | 0 | 0 | 0 |
| TR31635|c0_g1|m.57839 | Vitis vinifera | Putative uncharacterized protein | VIT_14s0128g00750 | 2129.5 | 83.5 | 93.367 |  | 50.937 |  |  | 0 | -1 | 0 | -1 | -1 | 0 | 0 | 0 |
| TR155862|c0_g1|m.16316 | Medicago truncatula | 50S ribosomal protein L3 | MTR_3g118210 | 13961 | 253.47 | 263.16 | 324.82 | 104.32 | 216.34 | 257.92 | 0 | 0 | 0 | 0 | 0 | 0 | 0 | 0 |
| TR121653|c0_g2|m.59298 | Arabidopsis thaliana | At2g32520 | At2g32520 | 68302 | 195.14 | 385.43 | 37.376 | 224.87 | 4113.6 | 3251.6 | 0 | 0 | 0 | 1 | 1 | 0 | 1 | 1 |
| TR135456|c0_g1|m.61752 | Vitis vinifera | Putative uncharacterized protein | VIT_01s0011g05280 | 3975.1 | 90.895 | 16.902 | 55.938 | 8.0939 | 224.18 | 50.002 | 0 | 0 | 0 | 0 | 0 | 0 | 0 | 0 |
| TR143714|c2_g2|m.13674 | Vitis vinifera | Glutathione peroxidase | VIT_04s0008g06780 | 4153.2 | 90.093 | 59.804 | 97.912 | 91.061 |  |  | 0 | 0 | 0 | -1 | -1 | 0 | 0 | 0 |
| TR121702|c0_g12|m.1893 | Medicago truncatula | Uncharacterized protein |  | 2657.1 |  |  |  |  |  |  | 0 | 0 | 0 | 0 | 0 | 0 | 0 | 0 |
| TR121704|c0_g1|m.17886 | Ricinus communis | Thylakoid lumenal 19 kDa protein, chloroplast, putative | RCOM_1293230 | 78115 | 1312.5 | 1773.4 | 895.17 | 473.33 | 1934.7 | 1877.2 | 0 | 0 | 0 | 0 | 1 | 0 | 0 | 1 |
| TR121710|c2_g11|m.43370 | Ricinus communis | Eukaryotic translation elongation factor, putative | RCOM_1068970 | 301190 | 2563.8 | 3217.2 | 2250.2 | 1773.3 | 9621.3 | 10588 | 0 | 0 | 0 | 1 | 1 | 0 | 1 | 1 |
| TR121710|c2_g4|m.60956 | Populus trichocarpa | Predicted protein | POPTRDRAFT_558749 | 58969 | 730.08 | 336.46 | 781.54 | 567.77 | 1324.2 | 906.74 | 1 | 1 | 0 | 0 | 0 | 0 | 0 | 0 |
| TR121716|c1_g7|m.31092 | Silene latifolia | Branched-chain-amino-acid aminotransferase (Fragment) |  | 5297.4 | 126.05 | 199.24 | 23.156 | 41.712 |  | 30.232 | 0 | -1 | 0 | 0 | 0 | 0 | 0 | 0 |
| TR121744|c1_g1|m.40046 | Vitis vinifera | Putative uncharacterized protein | VIT_05s0094g01630 | 114.24 |  |  |  |  |  |  | 0 | 0 | 0 | 0 | 0 | 0 | 0 | 0 |
| TR121750|c0_g12|m.49968 | Populus trichocarpa | Predicted protein | POPTRDRAFT_712009 | 17414 | 187.79 | 161.78 | 164.59 | 49.288 |  | 545 | 0 | 0 | 0 | 1 | 0 | 0 | 1 | 0 |
| TR123527|c0_g4|m.30584 | Vitis vinifera | Putative uncharacterized protein | VIT_10s0003g01680 | 6247.3 | 22.478 | 44.81 | 87.604 | 109.34 | 253.32 | 107.12 | 1 | 1 | 0 | 0 | 0 | 0 | 0 | 0 |
| TR157001|c0_g2|m.27851 | Vitis vinifera | Putative uncharacterized protein | VIT_14s0171g00310 | 6561.8 |  | 150.11 | 41.915 | 6.979 | 371.86 | 487.37 | 0 | 0 | 0 | 0 | 1 | 0 | 0 | 1 |
| TR121763|c1_g2|m.21555 | Vitis vinifera | Putative uncharacterized protein | VITISV_020819 | 8666.3 |  |  | 129.85 | 30.62 |  |  | 0 | 0 | 1 | 0 | -1 | 0 | 0 | 0 |
| TR144530|c0_g1|m.1652 | Vitis vinifera | Putative uncharacterized protein | VIT_10s0042g01220 | 161.11 |  |  |  |  |  |  | 0 | 0 | 0 | 0 | 0 | 0 | 0 | 0 |
| TR98524|c0_g7|m.34107 | Glycine max | Uncharacterized protein |  | 1368.3 | 30.436 |  |  | 43.023 |  |  | 0 | 0 | 0 | -1 | -1 | 0 | 0 | 0 |
| TR98524|c0_g15|m.39047 | Populus trichocarpa | Predicted protein | POPTRDRAFT_808453 | 2378.9 |  |  | 29.238 |  |  |  | 0 | 0 | 1 | 0 | -1 | 0 | 0 | 0 |
| TR121790|c0_g3|m.47471 | Ricinus communis | BRASSINOSTEROID INSENSITIVE 1-associated receptor kinase 1, putative | RCOM_1576610 | 96.867 |  |  |  |  |  |  | 0 | 0 | 0 | 0 | 0 | 0 | 0 | 0 |
| TR121796|c0_g8|m.24521 | Populus trichocarpa | Predicted protein | POPTRDRAFT_568826 | 2151.3 |  | 374.97 | 54.91 |  |  |  | 0 | -1 | 0 | -1 | -1 | 0 | 0 | 0 |
| TR121801|c0_g1|m.54737 | Vitis vinifera | Putative uncharacterized protein | VIT_06s0004g00480 | 167380 | 949.36 | 944.72 | 1355.2 | 1192.6 | 4049.4 | 4545.8 | 1 | 1 | 0 | 1 | 1 | 0 | 1 | 1 |
| TR121801|c0_g2|m.52099 | Physcomitrella patens | Predicted protein | PHYPADRAFT_144527 | 905.63 |  |  | 123.93 | 165.63 |  |  | 0 | 0 | 1 | 0 | -1 | 0 | 0 | 0 |
| TR122105|c0_g2|m.21955 | Vitis vinifera | Putative uncharacterized protein | VIT_16s0098g00940 | 5306.4 | 32.127 | 10.51 |  |  | 115.35 | 182.12 | 0 | 0 | -1 | 0 | 1 | 0 | 0 | 0 |
| TR122110|c1_g6|m.39301 | Populus trichocarpa | Predicted protein | POPTRDRAFT_1073542 | 217.2 |  |  |  |  |  |  | 0 | 0 | 0 | 0 | 0 | 0 | 0 | 0 |
| TR122112|c0_g1|m.52101 | Vitis vinifera | Putative uncharacterized protein | VIT_03s0017g02330 | 12961 | 143.87 | 153.29 | 142.19 | 113.49 | 540.53 | 536.79 | 0 | 0 | 0 | 1 | 1 | 0 | 1 | 1 |
| TR143736|c0_g3|m.49460 | Vitis vinifera | Peptidyl-prolyl cis-trans isomerase | VIT_01s0146g00110 | 160140 | 2487.7 | 2027.2 | 855.04 | 632.69 | 4287.5 | 3880.1 | 0 | 0 | -1 | 1 | 1 | -1 | 1 | 1 |
| TR122117|c1_g4|m.1208 | Populus trichocarpa | Predicted protein | POPTRDRAFT_566450 | 2344.8 |  |  |  |  |  | 392.21 | 0 | 0 | 0 | 1 | 1 | 0 | 0 | 0 |
| TR122120|c0_g3|m.12261 | Ricinus communis | Coatomer beta subunit, putative | RCOM_0980380 | 7140.1 | 21.714 | 91.688 | 163.36 | 93.73 | 140.56 | 155.25 | 1 | 1 | 0 | 0 | 0 | 0 | 0 | 0 |
| TR95582|c0_g1|m.17263 | Populus trichocarpa | Glucose-1-phosphate adenylyltransferase | POPTRDRAFT_830057 | 1584.6 | 6.3699 | 21.879 | 7.9116 |  |  |  | 0 | -1 | 0 | -1 | -1 | 0 | 0 | 0 |
| TR122146|c0_g7|m.36484 | Medicago truncatula | Aldose 1-epimerase family protein expressed | MTR_6g069630 | 3616.8 |  |  |  |  | 326.38 |  | 0 | 0 | 0 | 1 | 1 | 0 | 0 | 0 |
| TR122152|c0_g1|m.12431 | Vitis vinifera | Putative uncharacterized protein | VIT_17s0119g00350 | 6930.2 | 33.196 | 104.04 | 46.139 | 6.1979 | 221.84 |  | 0 | 0 | 0 | 0 | 0 | 0 | 0 | 0 |
| TR122152|c0_g1|m.12432 | Arabidopsis thaliana | Similar to dihydroxyacetone kinase | At1g48430/T1N15.4 | 4575.6 |  | 85.104 |  | 59.627 |  |  | 0 | -1 | 0 | -1 | -1 | 0 | 0 | 0 |
| TR122159|c1_g1|m.42913 | Glycine max | Uncharacterized protein | Gma.7420 | 5421.9 | 105.1 |  |  |  | 317.36 |  | 0 | 0 | -1 | 0 | 1 | 0 | 0 | 0 |
| TR122160|c0_g11|m.13892 | Ricinus communis | Spermidine synthase 1, putative | RCOM_0285840 | 1746.3 |  | 41.301 |  |  | 84.442 |  | 0 | 0 | -1 | 0 | 1 | 0 | 0 | 0 |
| TR122163|c0_g1|m.62771 | Vitis vinifera | Putative uncharacterized protein | VIT_04s0023g01300 | 17193 | 273.11 | 139.08 | 211.63 | 190.2 | 600.84 | 362.48 | 1 | 1 | 0 | 0 | 0 | 0 | 0 | 0 |
| TR141935|c0_g2|m.58654 | Medicago truncatula | LL-diaminopimelate aminotransferase | MTR_4g092620 | 23639 | 538.5 | 568.98 | 286.71 | 227 | 228.47 | 593.37 | 0 | 0 | -1 | 0 | 0 | -1 | 0 | 0 |
| TR122181|c0_g8|m.14979 | Ricinus communis | 2,3-bisphosphoglycerate-independent phosphoglycerate mutase | RCOM_1323170 | 77844 | 1015.2 | 918.26 | 780.71 | 336.88 | 2032.1 | 1428.6 | 0 | 0 | 0 | 0 | 0 | 0 | 0 | 0 |
| TR122187|c2_g5|m.38066 | Glycine max | Putative uncharacterized protein |  | 5094.3 |  | 55.401 | 182.62 |  |  |  | 0 | 0 | 0 | -1 | -1 | 0 | 0 | 0 |
| TR122188|c0_g3|m.51324 | Phytolacca acinosa | rRNA N-glycosidase |  | 112360 | 28.633 | 121.54 | 132.57 | 79.013 |  | 69.165 | 0 | 0 | 0 | 0 | 0 | 0 | 0 | 0 |
| TR137172|c2_g8|m.12550 | Populus trichocarpa | Acyl:coa ligase | ACLL2 | 12135 | 57.518 |  | 73.697 |  | 1990.5 | 1399.3 | 1 | 1 | 0 | 0 | 0 | 0 | 0 | 0 |
| TR97978|c0_g7|m.5512 | Vitis vinifera | Putative uncharacterized protein | VIT_15s0048g01590 | 1076.3 |  |  |  |  |  |  | 0 | 0 | 0 | 0 | 0 | 0 | 0 | 0 |
| TR122297|c0_g6|m.7189 | Ricinus communis | Aldehyde dehydrogenase, putative | RCOM_1511330 | 10013 | 87.974 | 114.11 |  |  | 1837.1 | 456.82 | 0 | 0 | -1 | 0 | 1 | 0 | 0 | 0 |
| TR122297|c1_g1|m.50732 | Vitis vinifera | Aldehyde dehydrogenase ALDH2B4_V3 |  | 77019 | 766.99 | 1074.7 | 1016.5 | 841.95 | 1236.1 | 871.77 | 1 | 1 | 0 | 0 | 0 | 0 | 0 | 0 |
| TR133641|c1_g5|m.53124 | Populus trichocarpa | Predicted protein | POPTRDRAFT_673211 | 4224.3 | 93.007 | 96.596 | 98.882 | 83.737 | 138.68 |  | 0 | 0 | 0 | 0 | 0 | 0 | 0 | 0 |
| TR122307|c0_g3|m.43811 | Populus trichocarpa | Cinnamyl alcohol dehydrogenase-like protein | CADL10 | 1368 | 217.35 | 90.528 |  |  |  |  | 0 | 0 | -1 | -1 | 0 | 0 | 0 | 0 |
| TR128352|c0_g1|m.61235 | Lotus japonicus | Uncharacterized protein |  | 2286.2 |  |  | 41.285 |  |  |  | 0 | 0 | 1 | 0 | -1 | 0 | 0 | 0 |
| TR99473|c0_g2|m.11786 | Vitis vinifera | Putative uncharacterized protein | VIT_07s0104g01080 | 10024 | 201.02 | 170.07 | 49.838 | 59.375 | 69.314 | 202.18 | 0 | 0 | -1 | 0 | 0 | -1 | 0 | 0 |
| TR122334|c0_g3|m.47859 | Medicago truncatula | Isocitrate dehydrogenase [NADP] | MTR_6g005470 | 3555.6 | 65.55 | 48.446 | 5.7697 | 49.124 | 100.01 | 169.49 | 0 | 0 | 0 | 0 | 0 | 0 | 0 | 0 |
| TR164212|c2_g1|m.2163 | Vitis vinifera | Putative uncharacterized protein | VIT_14s0068g01280 | 318210 | 4588.5 | 5665.9 | 1389.8 | 1068.2 | 9600.5 | 9656.2 | 0 | 0 | -1 | 1 | 1 | -1 | 1 | 1 |
| TR122352|c2_g4|m.31012 | Vitis vinifera | Putative uncharacterized protein | VITISV_021756 | 420.42 |  |  |  |  |  |  | 0 | 0 | 0 | 0 | 0 | 0 | 0 | 0 |
| TR133137|c0_g1|m.22155 | Vitis vinifera | Alternative oxidase | Aox2 | 3097.7 | 19.034 | 35.032 |  | 18.39 |  | 614.66 | 0 | 0 | 0 | 1 | 0 | 0 | 1 | 0 |
| TR141964|c0_g13|m.9367 | Arabidopsis thaliana | Aldolase-type TIM barrel family protein | At4g21320/T6K22_50 | 1123.9 |  |  |  |  | 92.335 | 106.26 | 0 | 0 | 0 | 1 | 1 | 0 | 0 | 0 |
| TR122471|c1_g4|m.18780 | Ricinus communis | Ornithine aminotransferase, putative | RCOM_0631280 | 2337.4 |  | 57.317 |  |  | 42.341 | 86.261 | 0 | 0 | -1 | 0 | 1 | 0 | 0 | 0 |
| TR122477|c0_g1|m.9560 | Cannabis sativa | Acyl-activating enzyme 10 |  | 6316.1 | 23.966 |  |  |  | 87.413 | 257.02 | 0 | 0 | -1 | 0 | 1 | 0 | 0 | 0 |
| TR122482|c0_g2|m.52946 | Vitis vinifera | Putative uncharacterized protein | VIT_17s0000g06420 | 447.71 |  |  | 8.3466 |  |  | 18.686 | 1 | 1 | 1 | 1 | 0 | 0 | 0 | 0 |
| TR122489|c0_g2|m.51881 | Vitis vinifera | Putative uncharacterized protein | VIT_12s0028g01600 | 36284 | 432.63 | 347.93 | 378.22 | 159.69 | 1040.9 | 1223 | 0 | 0 | 0 | 1 | 1 | 0 | 1 | 1 |
| TR122491|c0_g5|m.38787 | Vitis vinifera | Putative uncharacterized protein | VIT_05s0062g00890 | 1624.4 |  |  |  |  |  |  | 0 | 0 | 0 | 0 | 0 | 0 | 0 | 0 |
| TR122502|c0_g4|m.55582 | Populus trichocarpa | Predicted protein | POPTRDRAFT_559786 | 6125.5 | 32.566 |  | 50.961 | 43.92 |  | 103.8 | 1 | 1 | 0 | 0 | 0 | 0 | 0 | 0 |
| TR122504|c0_g10|m.47407 | Vitis vinifera | Putative uncharacterized protein | VIT_05s0020g02310 | 4934.3 | 9.1096 | 22.308 | 27.979 | 10.411 | 474.32 | 251.26 | 1 | 1 | 0 | 0 | 0 | 0 | 0 | 0 |
| TR122504|c0_g6|m.62387 | Arabidopsis lyrata | Putative uncharacterized protein | ARALYDRAFT_915248 | 42929 | 469.93 | 173.08 | 735.68 | 661.32 | 643.84 | 2011.6 | 1 | 1 | 0 | 0 | 0 | 0 | 0 | 0 |
| TR122504|c0_g9|m.46028 | Vitis vinifera | Putative uncharacterized protein | VIT_05s0020g02310 | 1289800 | 10485 | 13334 | 10959 | 9093.3 | 39216 | 38557 | 0 | 0 | 0 | 1 | 1 | 0 | 1 | 1 |
| TR86356|c0_g6|m.42489 | Vitis vinifera | Putative uncharacterized protein | VIT_06s0004g01360 | 2339 | 59.299 | 73.544 |  |  | 43.624 | 87.467 | 0 | 0 | -1 | 0 | 1 | 0 | 0 | 0 |
| TR122520|c0_g1|m.60025 | Zea mays | Aminomethyltransferase (Fragment) |  | 2037.1 |  |  |  | 63.023 |  |  | 0 | 0 | 1 | 0 | -1 | 0 | 0 | 0 |
| TR122520|c0_g4|m.11965 | Vitis vinifera | Aminomethyltransferase | VIT_10s0116g01540 | 35397 | 112.31 | 21.203 | 224.09 | 185.83 | 2166.5 | 1802.4 | 1 | 1 | 0 | 1 | 1 | 0 | 1 | 1 |
| TR122526|c1_g1|m.26736 | Populus trichocarpa | Predicted protein | POPTRDRAFT_712385 | 7981.5 | 112.83 | 149.75 | 156.47 | 162.2 |  | 104.52 | 0 | 0 | 0 | 0 | 0 | 0 | 0 | 0 |
| TR122526|c1_g11|m.42648 | Ricinus communis | Heat shock protein 70 (HSP70)-interacting protein, putative | RCOM_1679700 | 17341 | 62.008 | 80.542 | 362.85 | 143.95 | 463.26 | 432.92 | 1 | 1 | 0 | 1 | 0 | 0 | 1 | 0 |
| TR86385|c0_g2|m.49693 | Glycine max | Uncharacterized protein |  | 19972 | 493.98 | 277.98 | 325.94 | 269.7 | 636.36 | 686.75 | 0 | 0 | 0 | 0 | 1 | 0 | 0 | 1 |
| TR122526|c1_g4|m.46725 | Picea sitchensis | Putative uncharacterized protein |  | 8625 | 109.32 | 74.368 | 131.09 | 137.2 |  |  | 0 | 0 | 0 | -1 | -1 | 0 | 0 | 0 |
| TR122526|c1_g5|m.25143 | Glycine max | Uncharacterized protein |  | 10786 |  | 320.21 | 56.519 | 203.68 |  |  | 0 | -1 | 0 | -1 | -1 | 0 | 0 | 0 |
| TR122526|c1_g7|m.40525 | Vitis vinifera | Putative uncharacterized protein (Fragment) | VIT_00s2851g00010 | 11513 | 119.76 |  | 330.89 | 111.38 | 246.21 | 276.07 | 1 | 1 | 0 | 0 | 0 | 0 | 0 | 0 |
| TR45358|c0_g2|m.3904 | Glycine max | Uncharacterized protein | Gma.18139 | 4209.9 | 87.375 | 230.04 | 294.28 | 82.52 |  |  | 0 | 0 | 0 | -1 | -1 | 0 | 0 | 0 |
| TR122557|c0_g1|m.20545 | Nicotiana tabacum | Chaperone GrpE type 1 | GrpE1 | 1711.8 | 130.89 | 94.762 | 47.055 | 60.248 |  |  | 0 | -1 | 0 | -1 | -1 | 0 | 0 | 0 |
| TR123865|c0_g7|m.35150 | Vitis vinifera | Putative uncharacterized protein | VIT_19s0090g01190 | 4440.6 | 198.37 | 222.66 | 133.14 | 78.753 |  |  | 0 | -1 | 0 | -1 | -1 | 0 | 0 | 0 |
| TR122562|c1_g2|m.19213 | Populus trichocarpa | Predicted protein | POPTRDRAFT_591983 | 4848.4 | 29.186 | 10.216 | 27.219 | 41.084 | 28.299 | 233.34 | 1 | 1 | 0 | 0 | 0 | 0 | 0 | 0 |
| TR1234|c0_g1|m.6356 | Vitis vinifera | Putative uncharacterized protein | VIT_19s0014g03660 | 125900 | 603.05 | 679.14 | 1545.4 | 638.91 | 1486.5 | 1132.4 | 1 | 1 | 0 | 0 | 0 | 0 | 0 | 0 |
| TR97439|c0_g2|m.44832 | Vitis vinifera | Putative uncharacterized protein | VIT_01s0011g04140 | 1282.1 | 15.601 |  |  |  |  |  | 0 | 0 | -1 | -1 | 0 | 0 | 0 | 0 |
| TR89382|c0_g3|m.47725 | Vitis vinifera | Putative uncharacterized protein | VIT_01s0011g03740 | 2616.4 |  | 94.125 | 29.308 |  |  |  | 0 | -1 | 0 | -1 | -1 | 0 | 0 | 0 |
| TR123455|c0_g5|m.61020 | Vitis vinifera | Putative uncharacterized protein | VIT_15s0021g01230 | 1368.6 |  | 20.402 | 10.936 | 13.393 | 42.499 | 28.748 | 0 | 0 | 0 | 0 | 0 | 0 | 0 | 0 |
| TR123457|c0_g2|m.29278 | Populus trichocarpa | Endoplasmic reticulum [ER]-type calcium ATPase | POPTRDRAFT_768258 | 967.97 | 32.952 | 17.047 | 35.14 | 11.025 |  |  | 0 | -1 | 0 | -1 | -1 | 0 | 0 | 0 |
| TR123462|c0_g4|m.52533 | Ricinus communis | Vacuolar sorting protein, putative | RCOM_0363260 | 287.18 |  |  |  | 2.5691 |  |  | 0 | 0 | 1 | 0 | -1 | 0 | 0 | 0 |
| TR123465|c1_g2|m.25532 | Vitis vinifera | Putative uncharacterized protein | VIT_03s0038g04040 | 31896 | 744.99 | 993.62 | 478.36 | 257.87 | 945.6 | 550.6 | 0 | 0 | 0 | 0 | 0 | 0 | 0 | 0 |
| TR123465|c1_g4|m.47966 | Ricinus communis | Aminoacylase-1, putative | RCOM_1565970 | 14060 | 135.38 | 163.01 |  |  | 510.76 | 1307.8 | 0 | 0 | -1 | 0 | 1 | 0 | 0 | 0 |
| TR123466|c0_g2|m.34589 | Vitis vinifera | Putative uncharacterized protein | VIT_09s0002g00340 | 2330 |  |  |  | 16.96 |  | 67.631 | 1 | 1 | 1 | 1 | 0 | 0 | 0 | 0 |
| TR123466|c0_g4|m.61059 | Vitis vinifera | Putative uncharacterized protein | VIT_09s0002g00340 | 1171.7 |  |  | 10.981 |  |  | 48.887 | 1 | 1 | 1 | 1 | 0 | 0 | 0 | 0 |
| TR123481|c1_g3|m.18195 | Ricinus communis | 3-dehydroquinate synthase, putative | RCOM_0572340 | 1029.4 |  |  |  |  |  |  | 0 | 0 | 0 | 0 | 0 | 0 | 0 | 0 |
| TR123490|c0_g1|m.48868 | Populus trichocarpa | Predicted protein | POPTRDRAFT_552480 | 18578 | 98.737 | 126.82 | 188.52 | 197.02 | 797.78 | 333.7 | 1 | 1 | 1 | 0 | 0 | 1 | 0 | 0 |
| TR123491|c0_g2|m.17617 | Vitis vinifera | Putative uncharacterized protein | VIT_07s0031g02750 | 503.31 |  | 9.0459 |  |  |  |  | 0 | 0 | -1 | -1 | 0 | 0 | 0 | 0 |
| TR123493|c0_g2|m.10726 | Vitis vinifera | Putative uncharacterized protein | VIT_04s0023g01450 | 493.01 | 19.113 | 28.385 | 33.55 |  |  |  | 0 | 0 | 0 | -1 | -1 | 0 | 0 | 0 |
| TR123503|c0_g14|m.8743 | Vitis vinifera | Putative uncharacterized protein | VITISV_032086 | 231.88 |  |  |  |  |  |  | 0 | 0 | 0 | 0 | 0 | 0 | 0 | 0 |
| TR123503|c0_g16|m.46726 | Vitis vinifera | Putative uncharacterized protein | VIT_01s0011g00650 | 1038.2 |  |  | 19.887 | 13.258 |  |  | 0 | 0 | 1 | 0 | -1 | 0 | 0 | 0 |
| TR123506|c0_g1|m.22301 | Spinacia oleracea | Phosphorylase | SoSTPII | 828770 | 10219 | 11369 | 5748 | 4461.8 | 19151 | 19601 | 0 | 0 | -1 | 1 | 1 | -1 | 1 | 1 |
| TR134984|c0_g6|m.35630 | Populus trichocarpa | Predicted protein | POPTRDRAFT_825753 | 15969 | 96.319 | 132.55 | 115.34 | 120.84 | 705.19 | 81.753 | 1 | 1 | 0 | 0 | 0 | 0 | 0 | 0 |
| TR123517|c1_g3|m.17582 | Ricinus communis | Alpha-glucosidase, putative | RCOM_0252330 | 30415 | 261.43 | 173.23 | 178.75 | 88.253 | 1008.1 | 1001.7 | 0 | 0 | 0 | 1 | 1 | 0 | 1 | 1 |
| TR123521|c0_g6|m.32219 | Vitis vinifera | Putative uncharacterized protein | VIT_16s0022g02320 | 268430 | 3752.3 | 4396.3 | 2501.5 | 2155.2 | 6556.9 | 6164.6 | 0 | 0 | -1 | 1 | 1 | -1 | 1 | 1 |
| TR129960|c1_g1|m.7593 | Vitis vinifera | Putative uncharacterized protein | VIT_07s0104g01240 | 2301.3 | 67.579 | 3.7673 | 44.255 | 27.646 |  | 215.25 | 1 | 1 | 0 | 0 | 0 | 0 | 0 | 0 |
| TR144479|c0_g5|m.60330 | Vitis vinifera | Putative uncharacterized protein | VIT_01s0011g05280 | 3038.8 | 64.929 | 36.163 | 54.04 | 28.424 | 159.46 | 97.391 | 0 | 0 | 0 | 0 | 0 | 0 | 0 | 0 |
| TR130514|c0_g8|m.59842 | Vitis vinifera | Putative uncharacterized protein | VITISV_011425 | 8036.8 | 237.35 | 256.23 |  |  |  |  | 0 | 0 | -1 | -1 | 0 | 0 | 0 | 0 |
| TR123817|c0_g1|m.23693 | Populus trichocarpa | Predicted protein | POPTRDRAFT_555276 | 68189 | 169.95 | 490.57 | 382.29 | 55.191 | 2407.4 | 2390.2 | 0 | 0 | 0 | 1 | 1 | 0 | 1 | 1 |
| TR123821|c0_g2|m.38961 | Arabidopsis lyrata | Glyceraldehyde-3-phosphate dehydrogenase B subunit | GAPB | 38798 | 195.45 | 222.28 | 679.34 | 380.43 | 2125 | 1558.2 | 1 | 1 | 0 | 1 | 0 | 0 | 1 | 0 |
| TR123833|c1_g1|m.52295 | Ricinus communis | Chaperonin-60kD, ch60, putative | RCOM_0311770 | 5275.7 | 57.971 | 59.452 | 19.913 | 5.7161 | 135.57 | 34.089 | 0 | 0 | -1 | 0 | 0 | -1 | 0 | 0 |
| TR86355|c1_g5|m.61015 | Betula pendula | Alpha-tubulin | atub | 5649.2 |  | 11.43 | 61.768 |  |  | 235.87 | 1 | 1 | 0 | 0 | 0 | 0 | 0 | 0 |
| TR155896|c0_g2|m.9110 | Vitis vinifera | Putative uncharacterized protein | VIT_04s0008g02830 | 10904 | 173.51 | 91.087 | 146.71 | 97.655 | 130.1 | 154.89 | 0 | 0 | 0 | 0 | 0 | 0 | 0 | 0 |
| TR123850|c1_g4|m.15142 | Populus trichocarpa | Putative uncharacterized protein |  | 10656 | 353.2 |  |  | 167.29 |  | 567.81 | 0 | 0 | 0 | 0 | 0 | 0 | 0 | 0 |
| TR123863|c2_g1|m.3719 | Arabidopsis lyrata | Electron carrier/ protein disulfide oxidoreductase | ARALYDRAFT_917592 | 5940.4 |  |  |  | 6.096 | 256.41 | 289.69 | 1 | 1 | 1 | 1 | 0 | 0 | 0 | 0 |
| TR123881|c0_g3|m.29907 | Vitis vinifera | Putative uncharacterized protein | VIT_13s0067g01890 | 15298 | 98.716 | 133.06 | 10.65 | 63.95 | 418.93 | 654.14 | 0 | 0 | 0 | 0 | 0 | 0 | 0 | 0 |
| TR159718|c0_g1|m.54180 | Ricinus communis | Lipid binding protein, putative | RCOM_0865400 | 318.48 | 20.768 | 32.687 | 28.465 |  |  |  | 0 | 0 | 0 | -1 | -1 | 0 | 0 | 0 |
| TR124217|c0_g2|m.27002 | Vitis vinifera | Putative uncharacterized protein | VIT_09s0070g00370 | 530.91 |  | 21.397 |  |  | 26.473 | 18.986 | 0 | 0 | -1 | 0 | 1 | 0 | 0 | 0 |
| TR124220|c2_g13|m.52410 | Populus trichocarpa | Predicted protein | POPTRDRAFT_584709 | 2337.6 |  |  | 75.902 | 168.67 |  |  | 0 | 0 | 1 | 0 | -1 | 0 | 0 | 0 |
| TR124234|c1_g8|m.35501 | Ricinus communis | Protein transporter, putative | RCOM_0802800 | 1483.9 |  | 93.911 |  |  |  | 184.83 | 0 | 0 | -1 | 0 | 1 | 0 | 0 | 0 |
| TR124242|c0_g7|m.38954 | Vitis vinifera | Phosphoribosylformylglycinamidine cyclo-ligase | VITISV_002057 | 442.57 |  |  | 25.536 | 21.837 | 40.207 | 38.072 | 1 | 1 | 1 | 1 | 1 | 0 | 0 | 1 |
| TR124261|c0_g1|m.61904 | Vitis vinifera | Putative uncharacterized protein | VIT_17s0000g02670 | 6101.9 | 17.454 | 36.235 | 139.84 | 113.22 |  | 305.05 | 1 | 1 | 1 | 1 | 0 | 1 | 1 | 0 |
| TR124265|c1_g1|m.3308 | Vitis vinifera | Putative uncharacterized protein | VIT_17s0000g08520 | 2668.3 |  | 7.9592 | 15.134 | 16.437 |  |  | 0 | 0 | 0 | -1 | -1 | 0 | 0 | 0 |
| TR124279|c0_g4|m.54032 | Populus euphratica | CBL-interacting protein kinase 26 |  | 1751.7 |  |  |  | 224.27 |  |  | 0 | 0 | 1 | 0 | -1 | 0 | 0 | 0 |
| TR124283|c0_g1|m.23415 | Medicago truncatula | Sugar kinase, putative | MTR_7g099280 | 3931.1 | 48.068 | 47.82 | 31.888 | 38.919 | 118.54 | 96.877 | 0 | 0 | 0 | 1 | 1 | 0 | 1 | 1 |
| TR124292|c0_g1|m.53973 | Vitis vinifera | Putative uncharacterized protein | VIT_02s0033g01410 | 424.08 |  |  |  |  | 53.006 |  | 0 | 0 | 0 | 1 | 1 | 0 | 0 | 0 |
| TR124305|c1_g3|m.128 | Vitis vinifera | Putative uncharacterized protein | VIT_18s0001g06520 | 11066 | 218.04 | 88.093 | 186.91 | 35.705 | 125.57 | 438.37 | 0 | 0 | 0 | 0 | 0 | 0 | 0 | 0 |
| TR124312|c0_g7|m.16397 | Vitis vinifera | Putative uncharacterized protein | VIT_08s0007g08690 | 10706 | 113.9 | 167.99 | 167.6 | 114.36 | 305.97 | 360.3 | 1 | 1 | 0 | 1 | 1 | 0 | 1 | 1 |
| TR124325|c2_g3|m.52375 | Nicotiana tabacum | Phenylcoumaran benzylic ether reductase | TP7 | 51856 | 584.73 | 476.19 | 304.99 | 167.69 | 1911.3 | 1908.3 | 0 | 0 | 0 | 1 | 1 | 0 | 1 | 1 |
| TR124331|c1_g3|m.28272 | Ricinus communis | Heat shock 70 kDa protein, putative | RCOM_0980870 | 1453.8 |  |  |  |  | 126.85 |  | 0 | 0 | 0 | 1 | 1 | 0 | 0 | 0 |
| TR124335|c0_g1|m.43043 | Medicago truncatula | Uncharacterized protein |  | 33044 | 566.06 | 669.77 | 477.31 | 150.64 | 202.51 |  | 0 | -1 | 0 | 0 | 0 | 0 | 0 | 0 |
| TR124355|c3_g2|m.58690 | Nepenthes alata | Aspartic proteinase 4 | NaAP4 | 4421.3 |  |  |  |  | 550.03 |  | 0 | 0 | 0 | 1 | 1 | 0 | 0 | 0 |
| TR124355|c3_g5|m.57650 | Populus trichocarpa | Predicted protein | POPTRDRAFT_834438 | 20021 | 56.425 | 148.92 | 31.393 |  | 299.76 | 426.73 | 0 | 0 | 0 | 0 | 0 | 0 | 0 | 0 |
| TR124356|c0_g7|m.48332 | Populus trichocarpa | Predicted protein | POPTRDRAFT_769208 | 16798 | 284.28 | 438.01 | 299.85 | 194.45 | 662.66 | 416.57 | 0 | 0 | 0 | 0 | 0 | 0 | 0 | 0 |
| TR124373|c0_g2|m.16238 | Mesembryanthemum crystallinum | Putative vacuolar ATPase subunit 100 kDa subunit | vpha-a | 9612.2 | 35.922 | 57.833 |  | 7.2799 | 214.64 | 221.09 | 0 | 0 | 0 | 1 | 1 | 0 | 1 | 1 |
| TR124373|c0_g8|m.35025 | Mesembryanthemum crystallinum | Putative vacuolar ATPase subunit 100 kDa subunit | vpha-a | 5534.4 | 239.1 | 104.36 | 190.51 | 114.9 |  | 140.72 | 0 | -1 | 0 | 0 | 0 | 0 | 0 | 0 |
| TR124377|c0_g1|m.44325 | Ricinus communis | ATP synthase gamma chain 2, chloroplast, putative | RCOM_0904560 | 95951 | 1270 | 1614.9 | 1388.5 | 1019.9 | 2289.3 | 1585.8 | 0 | 0 | 0 | 0 | 0 | 0 | 0 | 0 |
| TR124396|c0_g1|m.19373 | Vitis vinifera | Putative uncharacterized protein | VIT_18s0001g07960 | 91.198 |  |  |  |  |  |  | 0 | 0 | 0 | 0 | 0 | 0 | 0 | 0 |
| TR138568|c0_g3|m.24080 | Vitis vinifera | Putative uncharacterized protein | VIT_12s0057g01240 | 817.56 |  |  |  |  | 166.75 |  | 0 | 0 | 0 | 1 | 1 | 0 | 0 | 0 |
| TR150089|c1_g6|m.48244 | Vitis vinifera | Proteasome subunit beta type | VIT_01s0010g02900 | 23346 | 135.78 | 127.6 | 56.918 | 84.315 | 454.78 | 485.41 | 0 | 0 | 0 | 1 | 1 | 0 | 1 | 1 |
| TR132365|c1_g6|m.20076 | Atriplex patens | rRNA N-glycosidase | RIP | 363.11 |  |  |  |  |  |  | 0 | 0 | 0 | 0 | 0 | 0 | 0 | 0 |
| TR126630|c0_g10|m.54566 | Phytolacca acinosa | rRNA N-glycosidase |  | 12313 |  |  | 11.507 |  |  |  | 0 | 0 | 1 | 0 | -1 | 0 | 0 | 0 |
| TR126630|c0_g5|m.33132 | Phytolacca icosandra | rRNA N-glycosidase (Fragment) | papII | 2922300 | 5137.1 | 5132.9 | 11866 | 9479.8 | 54294 | 54403 | 1 | 1 | 1 | 1 | 1 | 1 | 1 | 1 |
| TR126630|c0_g8|m.29684 | Phytolacca acinosa | rRNA N-glycosidase |  | 645420 | 153.01 | 524.49 | 2097.4 | 774.04 | 349.23 | 349.57 | 0 | 0 | 0 | 0 | 0 | 0 | 0 | 0 |
| TR94044|c0_g2|m.42744 | Populus trichocarpa | Putative uncharacterized protein |  | 65323 | 1133.4 | 1161 | 750.43 | 544.51 | 1105.3 | 1995.1 | 0 | 0 | -1 | 0 | 0 | -1 | 0 | 0 |
| TR133706|c0_g2|m.47692 | Arabidopsis lyrata | Pectinesterase | ARALYDRAFT_486545 | 4004.2 | 797.92 | 718.71 |  |  |  |  | 0 | 0 | -1 | -1 | 0 | 0 | 0 | 0 |
| TR126648|c0_g1|m.41466 | Glycine max | Uncharacterized protein | Gma.2000 | 6954.6 | 194.77 | 203.97 | 728.73 | 584.57 |  |  | 0 | 0 | 1 | -1 | -1 | 1 | 0 | 0 |
| TR126648|c0_g3|m.57371 | Ricinus communis | Acetylornithine deacetylase, putative | RCOM_0864770 | 30818 | 185.47 | 299.41 | 277.61 | 120.26 | 1491.7 | 1390.6 | 0 | 0 | 0 | 1 | 1 | 0 | 1 | 1 |
| TR126649|c0_g2|m.23835 | Ricinus communis | Phospholipase C, putative | RCOM_0739740 | 9092.7 | 94.323 | 187.93 | 381.4 | 356.9 |  | 46.697 | 0 | 0 | 1 | 0 | -1 | 1 | 0 | -1 |
| TR163298|c0_g2|m.17164 | Vitis vinifera | Putative uncharacterized protein | VIT_01s0011g02040 | 219.72 | 5.7383 |  | 8.7208 |  |  |  | 0 | 0 | 0 | -1 | -1 | 0 | 0 | 0 |
| TR126669|c0_g2|m.41421 | Populus trichocarpa | Putative uncharacterized protein | POPTRDRAFT_816277 | 36809 | 818.12 | 991.76 | 319.35 | 358.27 | 495.33 | 543.21 | 0 | 0 | -1 | 0 | 1 | -1 | 0 | 1 |
| TR86308|c0_g2|m.36680 | Vitis vinifera | Putative uncharacterized protein | VIT_05s0077g01210 | 1498.9 | 24.458 | 58.845 |  |  |  | 64.588 | 0 | 0 | -1 | 0 | 1 | 0 | 0 | 0 |
| TR126686|c1_g3|m.31180 | Camellia sinensis | Lactate dehydrogenase |  | 8607.9 | 311.37 | 206.3 | 193.86 | 270.43 |  |  | 0 | -1 | 0 | -1 | -1 | 0 | 0 | 0 |
| TR126692|c0_g2|m.47466 | Populus trichocarpa | 2-dehydro-3-deoxyphosphoheptonate aldolase/ 3-deoxy-d-arabino-heptulosonate 7-phosphate synthetase | DHS4 | 439.74 |  | 7.5596 | 10.037 | 7.5891 |  |  | 0 | 0 | 0 | -1 | -1 | 0 | 0 | 0 |
| TR127581|c0_g5|m.32231 | Bienertia sinuspersici | Chloroplast preprotein import receptor Toc132 |  | 565.06 | 15.798 | 14.255 | 11.379 | 6.2131 |  | 48.947 | 0 | 0 | 0 | 1 | 0 | 0 | 1 | 0 |
| TR127665|c0_g2|m.17478 | Vitis vinifera | Putative uncharacterized protein | VIT_03s0063g00680 | 7568.9 | 112.4 | 171.36 | 49.473 | 58.508 | 49.711 |  | 0 | -1 | 0 | 0 | 0 | 0 | 0 | 0 |
| TR127593|c0_g5|m.58458 | Vitis vinifera | Putative uncharacterized protein | VIT_18s0122g00830 | 5281.5 | 51.163 | 51.395 | 59.461 | 56.391 | 56.391 | 191.69 | 1 | 1 | 0 | 0 | 0 | 0 | 0 | 0 |
| TR127601|c0_g3|m.7423 | Gossypium turneri | Beta-mannosidase |  | 593.18 |  |  |  |  |  |  | 0 | 0 | 0 | 0 | 0 | 0 | 0 | 0 |
| TR127606|c1_g5|m.8844 | Vitis vinifera | Putative uncharacterized protein | VIT_07s0031g02090 | 408.86 |  |  |  |  | 24.618 | 34.665 | 0 | 0 | 0 | 1 | 1 | 0 | 0 | 0 |
| TR152321|c0_g2|m.26805 | Vitis vinifera | Putative uncharacterized protein | VIT_05s0020g01550 | 943.78 |  |  |  |  |  |  | 0 | 0 | 0 | 0 | 0 | 0 | 0 | 0 |
| TR142018|c0_g1|m.55103 | Vitis vinifera | Putative uncharacterized protein | VIT_14s0030g01910 | 1494.2 | 78.14 | 75.912 |  |  | 109.7 |  | 0 | 0 | -1 | 0 | 1 | 0 | 0 | 0 |
| TR127636|c0_g1|m.54521 | Vitis vinifera | Putative uncharacterized protein | VIT_07s0005g02620 | 31058 | 175.58 | 125.88 | 338.25 | 140.2 | 917.83 | 894.94 | 1 | 1 | 0 | 1 | 1 | 0 | 1 | 1 |
| TR127640|c1_g6|m.57237 | Populus trichocarpa | Predicted protein | POPTRDRAFT_736462 | 3233.8 | 31.887 | 21.909 |  | 3.8311 |  | 67.313 | 0 | 0 | 0 | 0 | 0 | 0 | 0 | 0 |
| TR127658|c62_g7|m.61267 | Schlumbergera virus X | Triple gene block protein 1 |  | 9265.2 | 83.73 | 92.596 |  | 27.98 |  |  | 0 | -1 | 0 | -1 | -1 | 0 | 0 | 0 |
| TR12766|c1_g1|m.9588 | Populus trichocarpa | Predicted protein | POPTRDRAFT_644713 | 8101.7 |  | 90.628 |  | 73.45 |  |  | 0 | -1 | 0 | -1 | -1 | 0 | 0 | 0 |
| TR127667|c3_g1|m.7144 | Vitis vinifera | Putative uncharacterized protein | VIT_18s0001g10330 | 837.1 |  |  | 5.4642 | 4.5034 |  | 36.358 | 1 | 1 | 1 | 1 | 1 | 0 | 0 | 1 |
| TR127667|c3_g14|m.29533 | Vitis vinifera | Putative uncharacterized protein | VIT_18s0001g10340 | 4448.4 |  | 332.24 | 706.16 | 557.22 |  |  | 0 | 0 | 0 | -1 | -1 | 0 | 0 | 0 |
| TR127669|c1_g10|m.42476 | Ricinus communis | L-asparaginase, putative | RCOM_1467530 | 1049.3 |  |  |  |  |  |  | 0 | 0 | 0 | 0 | 0 | 0 | 0 | 0 |
| TR127669|c1_g3|m.38745 | Ricinus communis | L-asparaginase, putative | RCOM_1467530 | 7197.2 | 51.016 |  | 8.1756 |  | 110.21 | 256.46 | 0 | 0 | 0 | 0 | 0 | 0 | 0 | 0 |
| TR127676|c1_g3|m.6468 | Vitis vinifera | Putative uncharacterized protein | VIT_11s0065g00150 | 3779.7 |  |  |  |  |  |  | 0 | 0 | 0 | 0 | 0 | 0 | 0 | 0 |
| TR127677|c0_g6|m.13770 | Glycine max | Uncharacterized protein |  | 13654 | 61.154 | 141.77 | 113 | 35.018 | 314.58 | 391.79 | 0 | 0 | 0 | 1 | 1 | 0 | 1 | 1 |
| TR12776|c0_g5|m.23980 | Populus trichocarpa | Predicted protein | POPTRDRAFT_831715 | 281910 | 2730.9 | 3040.4 | 3380.6 | 3011.3 | 7145.9 | 7638.5 | 1 | 1 | 0 | 1 | 1 | 0 | 1 | 1 |
| TR46364|c0_g1|m.43359 | Vitis vinifera | Putative uncharacterized protein | VIT_05s0102g00560 | 1749.6 |  |  |  |  | 206 |  | 0 | 0 | 0 | 1 | 1 | 0 | 0 | 0 |
| TR97425|c0_g2|m.20079 | Ricinus communis | Protein binding protein, putative | RCOM_0342940 | 23003 | 198.94 | 200.88 | 157.5 | 153.91 | 136.19 | 534.01 | 0 | 0 | 0 | 0 | 0 | 0 | 0 | 0 |
| TR131591|c0_g3|m.7524 | Vitis vinifera | Putative uncharacterized protein | VIT_04s0043g00720 | 2790.8 |  |  |  |  | 59.937 | 220.27 | 0 | 0 | 0 | 1 | 1 | 0 | 0 | 0 |
| TR127931|c0_g6|m.40886 | Populus trichocarpa | Predicted protein | POPTRDRAFT_558645 | 20539 | 264.79 | 251.92 | 168.16 | 113.33 | 582.24 | 280.46 | 0 | 0 | 0 | 0 | 0 | 0 | 0 | 0 |
| TR131062|c0_g2|m.45157 | Nepenthes alata | Aspartic proteinase 4 | NaAP4 | 13402 | 98.505 |  | 94.016 | 58.116 | 23.801 | 56.862 | 0 | -1 | 0 | 0 | 0 | 0 | 0 | 0 |
| TR127948|c0_g3|m.31357 | Hevea brasiliensis | Type II metacaspase |  | 580.93 |  |  |  |  |  | 43.554 | 0 | 0 | 0 | 1 | 1 | 0 | 0 | 0 |
| TR127954|c0_g6|m.45547 | Ricinus communis | Nuclease PA3, putative | RCOM_1062940 | 27876 | 117.89 | 531.47 | 228.91 | 134.17 | 1123.1 | 835.2 | 0 | 0 | 0 | 0 | 1 | 0 | 0 | 1 |
| TR127963|c0_g2|m.42461 | Beta vulgaris | Salt tolerance protein 2 | sato2 | 2795.6 |  | 7.7528 | 90.603 |  | 244.51 |  | 1 | 1 | 0 | 0 | 0 | 0 | 0 | 0 |
| TR149835|c0_g2|m.56 | Medicago truncatula | Putative uncharacterized protein | MTR_1g039490 | 3304.7 | 85.739 | 21.292 | 13.031 |  | 103.52 | 156.72 | 0 | 0 | 0 | 0 | 0 | 0 | 0 | 0 |
| TR127975|c0_g4|m.42522 | Glycine max | Phosphoribulokinase |  | 292360 | 4882.8 | 5242.2 | 2977.2 | 2191.2 | 6503.6 | 7879.6 | 0 | 0 | -1 | 0 | 1 | -1 | 0 | 1 |
| TR95064|c0_g3|m.4622 | Glycine max | Uncharacterized protein | Gma.4496 | 4624 | 92.715 | 17.678 | 62.284 | 39.773 | 137.33 | 159.35 | 1 | 1 | 0 | 0 | 1 | 0 | 0 | 1 |
| TR127984|c0_g1|m.37306 | Ricinus communis | Putative uncharacterized protein | RCOM_1068280 | 1728.8 | 134.26 | 40.458 |  | 6.8496 |  |  | 0 | -1 | 0 | -1 | -1 | 0 | 0 | 0 |
| TR39538|c10_g1|m.26997 | Salicornia brachiata | Abscisic acid stress ripening protein |  | 111820 | 921.03 | 811.82 | 480.97 | 792.01 | 3637.4 | 1965.6 | 0 | 0 | 0 | 0 | 0 | 0 | 0 | 0 |
| TR128330|c0_g1|m.23285 | Ricinus communis | Serine/threonine protein phosphatase 2a regulatory subunit A, putative | RCOM_0353450 | 28733 | 220.93 | 251.61 | 111.43 | 142.39 | 536.5 | 1965 | 0 | 0 | -1 | 0 | 0 | -1 | 0 | 0 |
| TR15077|c0_g1|m.19462 | Vitis vinifera | Putative uncharacterized protein | VIT_18s0164g00030 | 106340 | 219.79 | 790.77 | 129.37 | 111.21 | 4218.5 | 2993.9 | 0 | 0 | 0 | 1 | 1 | 0 | 1 | 1 |
| TR128355|c0_g1|m.38560 | Dimocarpus longan | Putative uncharacterized protein |  | 234330 | 714.99 | 1537.6 | 1393.5 | 1521.5 | 8257.5 | 8282.3 | 1 | 1 | 0 | 1 | 1 | 0 | 1 | 1 |
| TR128357|c0_g2|m.31759 | Vitis vinifera | Putative uncharacterized protein | VIT_11s0052g00620 | 2108.5 | 22.404 | 3.806 | 25.944 | 13.342 | 7.2691 |  | 0 | 0 | 0 | 0 | 0 | 0 | 0 | 0 |
| TR128364|c0_g2|m.54061 | Malpighia glabra | Dehydroascorbate reductase |  | 673.29 |  | 66.425 |  | 41.12 |  |  | 0 | -1 | 0 | -1 | -1 | 0 | 0 | 0 |
| TR128373|c0_g3|m.47982 | Silene latifolia | Membrane steroid-binding protein (Fragment) |  | 47616 | 792.71 | 228.73 | 445.86 | 377.88 | 1234.4 | 1443 | 0 | 0 | 0 | 0 | 1 | 0 | 0 | 1 |
| TR128388|c0_g3|m.54587 | Oryza sativa | Os01g0235300 protein | P0702F03.34 | 1323.5 |  |  |  |  |  |  | 0 | 0 | 0 | 0 | 0 | 0 | 0 | 0 |
| TR128400|c0_g1|m.37973 | Vitis vinifera | Putative uncharacterized protein | VIT_05s0077g02010 | 299.62 |  |  |  |  |  |  | 0 | 0 | 0 | 0 | 0 | 0 | 0 | 0 |
| TR128400|c0_g3|m.10028 | Brachypodium distachyon | Uncharacterized protein | BRADI1G42880 | 22100 |  |  |  |  |  | 953.41 | 0 | 0 | 0 | 1 | 1 | 0 | 0 | 0 |
| TR12841|c0_g1|m.48027 | Vitis vinifera | Putative uncharacterized protein | VIT_18s0089g00930 | 2912.5 | 98.044 |  | 95.966 | 56.122 |  | 48.497 | 0 | -1 | 0 | 0 | 0 | 0 | 0 | 0 |
| TR128595|c2_g6|m.54648 | Vitis vinifera | Putative uncharacterized protein | VIT_06s0004g01770 | 1519.5 | 53.038 | 50.498 | 81.521 | 61.483 |  |  | 0 | 0 | 0 | -1 | -1 | 0 | 0 | 0 |
| TR128596|c0_g1|m.9027 | Amaranthus cruentus | Starch synthase II | SsII | 10739 | 117.44 | 114.38 |  | 1.9457 | 409.1 |  | 0 | 0 | -1 | 1 | 0 | -1 | 1 | 0 |
| TR153917|c0_g1|m.27263 | Vitis vinifera | Putative uncharacterized protein | VIT_16s0098g01630 | 3604 | 24.5 | 47.907 |  |  |  | 522.43 | 0 | 0 | -1 | 1 | 1 | 0 | 1 | 0 |
| TR128598|c2_g1|m.50612 | Vitis vinifera | Putative uncharacterized protein | VIT_16s0098g01630 | 20474 | 21.06 | 113.76 |  |  | 674.17 | 502.59 | 0 | 0 | -1 | 1 | 1 | 0 | 1 | 0 |
| TR128598|c4_g1|m.4581 | Ricinus communis | Importin beta-1, putative | RCOM_0736490 | 30587 | 97.834 | 165.45 | 205.73 | 125.73 | 1491.3 | 950.72 | 1 | 1 | 0 | 0 | 0 | 0 | 0 | 0 |
| TR128612|c2_g1|m.32901 | Arabidopsis thaliana | Transducin/WD40 domain-containing protein | At5g24710 | 865.07 | 37.555 | 41.493 | 26.709 | 7.172 |  |  | 0 | -1 | 0 | -1 | -1 | 0 | 0 | 0 |
| TR128625|c0_g1|m.21711 | Vitis vinifera | Putative uncharacterized protein | VIT_13s0067g03300 | 8232.7 | 91.143 | 76.746 | 100.16 | 100.68 | 378.29 | 312.26 | 1 | 1 | 0 | 1 | 1 | 0 | 1 | 1 |
| TR128626|c2_g1|m.26612 | Vitis vinifera | Putative uncharacterized protein | VIT_17s0000g00160 | 18180 | 109.57 | 124.56 | 145.66 | 174.57 | 602.56 | 742.3 | 1 | 1 | 0 | 1 | 1 | 0 | 1 | 1 |
| TR128633|c0_g1|m.7915 | Vitis vinifera | Putative uncharacterized protein | VIT_03s0063g01110 | 5329.3 | 47.217 | 44.705 | 10.455 | 34.3 | 142.75 | 170.71 | 0 | 0 | 0 | 1 | 1 | 0 | 1 | 1 |
| TR128640|c0_g2|m.10470 | Populus trichocarpa | Predicted protein | POPTRDRAFT_826658 | 463.38 |  | 6.8652 |  |  |  |  | 0 | 0 | -1 | -1 | 0 | 0 | 0 | 0 |
| TR128641|c1_g5|m.1399 | Vitis vinifera | Putative uncharacterized protein | VIT_18s0076g00310 | 1302.8 | 17.681 | 25.718 | 15.213 | 23.249 |  | 60.247 | 0 | 0 | 0 | 0 | 0 | 0 | 0 | 0 |
| TR128658|c2_g3|m.35977 | Beta vulgaris | Glutamate synthase |  | 1246.6 |  | 84.289 | 63.81 | 49.79 |  |  | 0 | -1 | 0 | -1 | -1 | 0 | 0 | 0 |
| TR90496|c0_g9|m.43900 | Agave tequilana | Chaperone |  | 9927.9 |  |  |  |  |  |  | 0 | 0 | 0 | 0 | 0 | 0 | 0 | 0 |
| TR81383|c0_g4|m.36573 | Ricinus communis | Mitochondrial carrier protein, putative | RCOM_0075490 | 148.15 |  |  |  |  |  |  | 0 | 0 | 0 | 0 | 0 | 0 | 0 | 0 |
| TR128691|c0_g1|m.40481 | Nicotiana tabacum | Chitinase, class V | chi-V | 4208 |  |  |  |  |  | 155.8 | 0 | 0 | 0 | 1 | 1 | 0 | 0 | 0 |
| TR128693|c0_g5|m.2981 | Glycine max | Uncharacterized protein | Gma.10869 | 20422 | 458.78 | 492.32 | 394.3 | 376.17 | 162.85 | 473.55 | 0 | -1 | 0 | 0 | 0 | 0 | 0 | 0 |
| TR64156|c0_g2|m.8487 | Vitis vinifera | Putative uncharacterized protein | VIT_19s0014g01330 | 754.05 | 88.128 |  |  |  |  |  | 0 | 0 | -1 | -1 | 0 | 0 | 0 | 0 |
| TR139781|c0_g3|m.3460 | Ricinus communis | Chlorophyll A/B binding protein, putative | RCOM_1471590 | 803.65 | 30.606 |  | 146.59 | 75.727 |  |  | 0 | 0 | 0 | -1 | -1 | 0 | 0 | 0 |
| TR128712|c0_g2|m.5497 | Glycine max | Uncharacterized protein | Gma.17208 | 19875 | 467.01 | 781.71 | 215.79 | 28.743 | 241.03 | 863.91 | 0 | 0 | 0 | 0 | 0 | 0 | 0 | 0 |
| TR128719|c0_g1|m.1044 | Craterostigma plantagineum | Phospholipase D | pld-1 | 18467 | 223.05 | 304.05 | 346.57 | 194.42 | 385.51 | 459.7 | 0 | 0 | 0 | 0 | 0 | 0 | 0 | 0 |
| TR144400|c0_g1|m.57486 | Vitis vinifera | Putative uncharacterized protein | VIT_01s0011g00620 | 1318.2 |  |  |  |  |  |  | 0 | 0 | 0 | 0 | 0 | 0 | 0 | 0 |
| TR128751|c0_g1|m.51703 | Arachis hypogaea | Perchloric acid soluble translation inhibitor protein |  | 261.04 |  |  | 39.891 |  |  |  | 0 | 0 | 1 | 0 | -1 | 0 | 0 | 0 |
| TR32042|c0_g8|m.16182 | Vitis vinifera | Putative uncharacterized protein | VIT_00s0370g00020 | 7189.3 | 271.63 | 307.61 | 109.66 | 67.648 |  |  | 0 | -1 | -1 | -1 | -1 | -1 | 0 | 0 |
| TR86529|c0_g1|m.29354 | Arabidopsis thaliana | Alcohol dehydrogenase class-3 | HOT5 | 988.25 |  |  | 12.383 | 12.439 |  | 52.95 | 1 | 1 | 1 | 1 | 1 | 0 | 0 | 1 |
| TR128764|c0_g1|m.20323 | Cucumis melo | Polygalacturonase-inhibiting protein |  | 68091 | 1593 | 953.3 | 1956.5 | 1641 | 1046.2 | 1069.6 | 0 | 0 | 0 | 0 | -1 | 0 | 0 | -1 |
| TR89812|c0_g5|m.62889 | Solanum lycopersicum | Chloroplast sedoheptulose-1,7-bisphosphatase | SBPase | 121200 | 2225.2 | 2615.2 | 984.73 | 850.51 | 3559 | 3835.4 | 0 | 0 | -1 | 1 | 1 | -1 | 1 | 1 |
| TR128775|c1_g25|m.7402 | Gossypium hirsutum | Lactoylglutathione lyase |  | 1052.5 |  |  |  |  |  |  | 0 | 0 | 0 | 0 | 0 | 0 | 0 | 0 |
| TR128775|c1_g3|m.51122 | Ricinus communis | Lactoylglutathione lyase, putative | RCOM_0904280 | 420000 | 5101.5 | 5402.8 | 1612.8 | 1328.9 | 11221 | 10097 | 0 | 0 | -1 | 1 | 1 | -1 | 1 | 1 |
| TR7272|c0_g1|m.18512 | Vitis vinifera | Putative uncharacterized protein | VIT_08s0007g05370 | 1502.5 |  |  |  |  |  | 70.895 | 0 | 0 | 0 | 1 | 1 | 0 | 0 | 0 |
| TR27562|c0_g1|m.19279 | Arabidopsis halleri | Heavy metal transporter MTP1 | cdf1-3 | 666.87 |  |  | 204.73 |  |  |  | 0 | 0 | 1 | 0 | -1 | 0 | 0 | 0 |
| TR50311|c0_g1|m.60948 | Ricinus communis | Chlorophyll A/B binding protein, putative | RCOM_0644360 | 111310 | 1251.3 | 1357.3 | 2581.6 | 2215.6 | 1125.6 | 935.3 | 0 | 0 | 1 | 0 | -1 | 1 | 0 | -1 |
| TR129544|c1_g6|m.44523 | Silene latifolia | Cystathionine beta-synthase domain-containing protein (Fragment) |  | 10843 |  | 248.63 |  |  |  |  | 0 | 0 | -1 | -1 | 0 | 0 | 0 | 0 |
| TR129391|c0_g1|m.22959 | Ricinus communis | Nucleoredoxin, putative | RCOM_0528060 | 140040 | 1350.8 | 1506.7 | 845.2 | 586.87 | 2643.3 | 1757.4 | 0 | 0 | -1 | 0 | 0 | -1 | 0 | 0 |
| TR129409|c0_g1|m.14010 | Ricinus communis | 60S ribosomal protein L18, putative | RCOM_1178700 | 68850 | 443.96 | 537.24 | 750.33 | 731.77 | 2081 | 2172.9 | 1 | 1 | 1 | 1 | 1 | 1 | 1 | 1 |
| TR129409|c0_g5|m.36831 | Populus trichocarpa | Predicted protein | POPTRDRAFT_572675 | 3212.4 | 44.15 | 55.784 | 156.81 | 107.24 |  | 169.14 | 1 | 1 | 0 | 0 | 0 | 0 | 0 | 0 |
| TR129413|c0_g1|m.24527 | Vitis vinifera | Putative uncharacterized protein | VIT_04s0008g05540 | 685.02 |  |  |  | 8.9376 |  |  | 0 | 0 | 1 | 0 | -1 | 0 | 0 | 0 |
| TR129418|c0_g3|m.37632 | Vitis vinifera | Putative uncharacterized protein | VIT_09s0002g03930 | 41173 | 405.62 | 320.71 | 140.24 | 389.14 | 567.3 | 512.67 | 0 | 0 | 0 | 0 | 0 | 0 | 0 | 0 |
| TR81435|c0_g1|m.27829 | Populus trichocarpa | Predicted protein | POPTRDRAFT_835204 | 13913 | 36.192 | 12.544 | 43.456 | 67.878 | 463.42 | 565.98 | 1 | 1 | 0 | 1 | 1 | 0 | 1 | 1 |
| TR129430|c0_g5|m.15358 | Ricinus communis | Heat shock protein, putative | RCOM_1082490 | 204070 | 1711.5 | 1708.4 | 905.61 | 685.2 | 3021.7 | 3962 | 0 | 0 | -1 | 0 | 1 | -1 | 0 | 1 |
| TR27438|c0_g1|m.23469 | Vitis vinifera | Proteasome subunit alpha type | VIT_03s0038g02300 | 119970 | 1057.7 | 1248 | 709.34 | 458.64 | 2838.6 | 3175.9 | 0 | 0 | 0 | 1 | 1 | 0 | 1 | 1 |
| TR129434|c0_g2|m.42303 | Vitis vinifera | Putative uncharacterized protein | VIT_16s0098g00830 | 85804 | 875.37 | 1060 | 433.22 | 511.84 | 1984.6 | 2001.9 | 0 | 0 | -1 | 1 | 1 | -1 | 1 | 1 |
| TR137122|c0_g1|m.30240 | Arabidopsis thaliana | Octicosapeptide/Phox/Be.1 domain-containing protein | At2g25290 | 303.01 |  |  | 31.464 |  |  |  | 0 | 0 | 1 | 0 | -1 | 0 | 0 | 0 |
| TR153493|c0_g2|m.14417 | Beta vulgaris | Salt tolerance protein 4 | sato4 | 1827.5 |  | 109.79 | 106.66 | 91.592 |  |  | 0 | -1 | 0 | -1 | -1 | 0 | 0 | 0 |
| TR129547|c0_g3|m.42100 | Glycine max | Uncharacterized protein | Gma.10987 | 199840 | 1278.6 | 1531.8 | 889.46 | 531.74 | 7511.7 | 6252.2 | 0 | 0 | 0 | 1 | 1 | 0 | 1 | 1 |
| TR129547|c0_g5|m.38012 | Ricinus communis | Ribulose bisphosphate carboxylase/oxygenase activase 1, chloroplast, putative | RCOM_1480310 | 37068 | 171.08 | 251.36 | 143.63 | 46.424 | 967.24 | 1571.9 | 0 | 0 | 0 | 0 | 0 | 0 | 0 | 0 |
| TR129556|c0_g2|m.35963 | Vitis vinifera | Putative uncharacterized protein | VIT_09s0002g04250 | 4387.4 | 77.613 | 51.502 | 189.71 | 35.261 | 264.97 |  | 1 | 1 | 0 | 0 | 0 | 0 | 0 | 0 |
| TR129559|c0_g3|m.62020 | Vitis vinifera | Putative uncharacterized protein | VIT_17s0000g07450 | 19887 | 520.25 | 361.19 | 143.46 | 257.64 | 110.88 |  | 0 | -1 | 0 | 0 | 0 | 0 | 0 | 0 |
| TR129561|c2_g6|m.13989 | Populus trichocarpa | Predicted protein (Fragment) | POPTRDRAFT_288825 | 11366 | 97.843 | 39.319 | 26.785 | 85.527 |  | 199.17 | 0 | 0 | 0 | 0 | 0 | 0 | 0 | 0 |
| TR129566|c0_g1|m.16871 | Vitis vinifera | Putative uncharacterized protein | VIT_19s0015g00430 | 1173.1 | 168.17 |  |  |  |  |  | 0 | 0 | -1 | -1 | 0 | 0 | 0 | 0 |
| TR129582|c0_g5|m.16983 | Vitis vinifera | Putative uncharacterized protein | VIT_06s0004g02900 | 6173.6 |  |  | 49.408 |  | 504.1 |  | 1 | 1 | 1 | 1 | 0 | 0 | 0 | 0 |
| TR129583|c0_g2|m.41869 | Vitis vinifera | Putative uncharacterized protein | VIT_14s0006g03200 | 2414.6 |  |  |  |  | 457.16 |  | 0 | 0 | 0 | 1 | 1 | 0 | 0 | 0 |
| TR129590|c0_g12|m.12184 | Mesembryanthemum crystallinum | 26S proteasome regulatory subunit S5A |  | 25962 | 372.2 | 396.24 | 442.87 | 400.34 | 511.94 | 189.35 | 0 | 0 | 0 | 0 | 0 | 0 | 0 | 0 |
| TR129612|c1_g11|m.56127 | Populus trichocarpa | Predicted protein | POPTRDRAFT_1122239 | 2607.6 |  |  |  |  |  |  | 0 | 0 | 0 | 0 | 0 | 0 | 0 | 0 |
| TR129622|c0_g8|m.53597 | Populus trichocarpa | Predicted protein | POPTRDRAFT_1118260 | 904.19 | 44.932 |  |  |  |  | 50.71 | 0 | 0 | -1 | 0 | 1 | 0 | 0 | 0 |
| TR129794|c0_g1|m.58070 | Mesembryanthemum crystallinum | Thylakoid-bound L-ascorbate peroxidase |  | 23701 | 541.18 | 468.8 | 139.58 | 63.072 | 480.97 | 628.08 | 0 | 0 | -1 | 0 | 1 | -1 | 0 | 1 |
| TR129804|c0_g2|m.53393 | Vitis vinifera | Glutathione reductase (NADPH) (Fragment) | GOR | 2771.3 | 70.846 | 33.383 |  | 10.256 |  | 82.686 | 0 | 0 | 0 | 0 | 0 | 0 | 0 | 0 |
| TR144497|c1_g1|m.43191 | Vitis vinifera | Putative uncharacterized protein | VIT_15s0048g02700 | 1973.6 | 59.778 | 24.328 | 29.157 | 10.071 |  |  | 0 | -1 | 0 | -1 | -1 | 0 | 0 | 0 |
| TR129830|c1_g2|m.2608 | Coffea arabica | Hydroxycinnamoyl-CoA shikimate/quinate hydroxycinnamoyltransferase | HCT | 2870.6 | 23.464 |  | 90.345 | 13.852 | 41.147 | 386.28 | 1 | 1 | 0 | 0 | 0 | 0 | 0 | 0 |
| TR129844|c0_g4|m.61491 | Vitis vinifera | Putative uncharacterized protein | VIT_03s0063g00610 | 27075 | 212.91 | 162.12 | 229.76 | 198.52 | 588.96 | 763.73 | 1 | 1 | 0 | 1 | 1 | 0 | 1 | 1 |
| TR129846|c1_g1|m.55708 | Vitis vinifera | Putative uncharacterized protein | VIT_11s0037g00180 | 9577.2 | 14.358 | 92.332 | 86.497 | 59.857 |  | 255.94 | 1 | 1 | 0 | 0 | 0 | 0 | 0 | 0 |
| TR129847|c0_g1|m.6160 | Ricinus communis | 50 kDa ketoavyl-ACP synthase (Precursor) | KASI | 2859.8 | 40.756 |  |  | 81.638 | 316.85 |  | 1 | 1 | 0 | 0 | 0 | 0 | 0 | 0 |
| TR135423|c0_g1|m.10219 | Medicago truncatula | V-type ATP synthase beta chain | MTR_7g081010 | 1482900 | 22031 | 24721 | 9371.8 | 8941.4 | 33996 | 36620 | 0 | 0 | -1 | 1 | 1 | -1 | 1 | 1 |
| TR129853|c0_g2|m.18661 | Populus trichocarpa | Predicted protein | POPTRDRAFT_723538 | 6140.1 | 36.387 | 225.88 | 109.09 | 32.887 | 169.75 | 163.24 | 0 | 0 | 0 | 0 | 0 | 0 | 0 | 0 |
| TR129867|c0_g1|m.20438 | Populus trichocarpa | Predicted protein | POPTRDRAFT_743889 | 638.95 |  |  |  |  |  |  | 0 | 0 | 0 | 0 | 0 | 0 | 0 | 0 |
| TR129869|c2_g2|m.52691 | Vitis vinifera | Putative uncharacterized protein | VIT_13s0019g02350 | 437.37 |  |  |  |  |  |  | 0 | 0 | 0 | 0 | 0 | 0 | 0 | 0 |
| TR129869|c3_g2|m.44516 | Vitis vinifera | Putative uncharacterized protein | VIT_13s0019g02350 | 176930 | 4392.3 | 5068.2 | 1812.7 | 652.28 | 5003.9 | 4707.2 | 0 | 0 | -1 | 0 | 1 | -1 | 0 | 1 |
| TR163307|c0_g5|m.57994 | Glycine max | Uncharacterized protein | Gma.6614 | 11442 | 91.156 | 146.27 | 43.514 | 151.84 | 240.13 | 240.37 | 0 | 0 | 0 | 1 | 0 | 0 | 1 | 0 |
| TR129900|c0_g1|m.32503 | Vitis vinifera | Putative uncharacterized protein | VIT_09s0002g01800 | 16983 | 39.982 | 203.95 | 148.48 | 78.885 | 161.05 | 509.56 | 1 | 1 | 0 | 0 | 0 | 0 | 0 | 0 |
| TR150358|c0_g1|m.40073 | Glycine max | Uncharacterized protein |  | 821.67 |  | 40.304 | 54.63 | 55.447 |  |  | 0 | 0 | 0 | -1 | -1 | 0 | 0 | 0 |
| TR129909|c0_g2|m.47231 | Glycine max | Uncharacterized protein | Gma.21796 | 2681.9 | 12.265 |  | 25.539 | 17.402 |  | 23.801 | 1 | 1 | 0 | 0 | 0 | 0 | 0 | 0 |
| TR129913|c0_g3|m.31311 | Vitis vinifera | Adenylyl cyclase-associated protein | VIT_03s0063g02500 | 7582.7 | 70.932 | 81.31 | 93.728 | 89.177 | 262.95 | 291.86 | 1 | 1 | 0 | 1 | 1 | 0 | 1 | 1 |
| TR136946|c0_g3|m.13923 | Populus trichocarpa | Predicted protein | POPTRDRAFT_818217 | 2353.1 |  | 36.41 | 19.899 | 33.778 |  |  | 0 | -1 | 0 | -1 | -1 | 0 | 0 | 0 |
| TR136946|c0_g3|m.13924 | Vitis vinifera | Putative uncharacterized protein | VIT_03s0038g02830 | 1224.6 |  |  |  |  | 113.04 | 100.01 | 0 | 0 | 0 | 1 | 1 | 0 | 0 | 0 |
| TR148441|c0_g1|m.3687 | Vitis vinifera | Putative uncharacterized protein | VIT_12s0034g02230 | 2403.6 | 30.355 | 19.07 | 27.674 | 32.833 | 58.49 | 90.235 | 1 | 1 | 0 | 0 | 0 | 0 | 0 | 0 |
| TR96263|c0_g1|m.11343 |  |  |  | 2784.6 | 122.25 | 171.63 | 160.15 | 163.93 |  |  | 0 | 0 | 0 | -1 | -1 | 0 | 0 | 0 |
| TR44939|c1_g1|m.46308 | Gossypium hirsutum | Elongation factor 1-alpha | EF1A4 | 2863.9 |  |  |  |  | 368.08 |  | 0 | 0 | 0 | 1 | 1 | 0 | 0 | 0 |
| TR129954|c0_g9|m.28433 | Vitis vinifera | Putative uncharacterized protein | VIT_06s0080g00880 | 519.31 |  |  |  |  |  |  | 0 | 0 | 0 | 0 | 0 | 0 | 0 | 0 |
| TR137276|c0_g2|m.18783 | Vitis vinifera | Pyruvate kinase | VIT_16s0050g02180 | 186.11 | 4.1366 | 2.8638 |  |  |  |  | 0 | 0 | -1 | -1 | 0 | 0 | 0 | 0 |
| TR129961|c1_g1|m.56687 | Populus trichocarpa | Predicted protein | POPTRDRAFT_1089922 | 2739.8 |  |  |  |  |  |  | 0 | 0 | 0 | 0 | 0 | 0 | 0 | 0 |
| TR162519|c0_g6|m.10255 | Sesuvium portulacastrum | Sodium/hydrogen exchanger | NHX1 | 7897 | 49.486 | 39.806 | 55.794 | 34.806 | 169.26 |  | 0 | 0 | 0 | 1 | 0 | 0 | 1 | 0 |
| TR148816|c0_g2|m.11504 | Vitis vinifera | Putative uncharacterized protein | VIT_03s0097g00620 | 11383 | 151.38 | 67.006 | 12.787 | 73.406 | 95.357 | 41.971 | 0 | 0 | 0 | 0 | 0 | 0 | 0 | 0 |
| TR85689|c1_g1|m.37061 | Vitis vinifera | Putative uncharacterized protein | VIT_15s0045g01250 | 1508 |  |  |  | 32.222 |  |  | 0 | 0 | 1 | 0 | -1 | 0 | 0 | 0 |
| TR85625|c0_g3|m.60263 | Vitis vinifera | Putative uncharacterized protein | VIT_14s0006g02960 | 1007.5 |  | 6.3427 |  | 13.49 | 23.172 |  | 1 | 1 | 0 | 0 | 0 | 0 | 0 | 0 |
| TR129988|c1_g1|m.51270 | Ricinus communis | Lipoxygenase | RCOM_0677750 | 1035.7 |  |  | 158.5 | 126.93 |  |  | 0 | 0 | 1 | 0 | -1 | 0 | 0 | 0 |
| TR130072|c0_g1|m.10176 | Beta vulgaris | Sucrose synthase | SBSS2 | 292720 | 1241.9 | 1924.5 | 3901.3 | 3157.5 | 15544 | 15028 | 1 | 1 | 0 | 1 | 1 | 0 | 1 | 1 |
| TR130081|c0_g1|m.7742 | Glycine max | Uncharacterized protein | Gma.26739 | 6457.3 |  |  | 143.26 |  | 109.16 | 152.17 | 0 | 0 | 1 | 1 | 0 | 0 | 0 | 0 |
| TR158378|c0_g6|m.9429 | Ricinus communis | AMP-activated protein kinase, gamma regulatory subunit, putative | RCOM_1506390 | 11609 | 114.12 | 94.09 | 88.91 | 61.082 | 197.1 | 166.03 | 0 | 0 | 0 | 0 | 1 | 0 | 0 | 1 |
| TR148808|c0_g15|m.31651 | Brachypodium distachyon | Uncharacterized protein | BRADI3G55340 | 5370.2 | 264.38 | 251.51 | 318.73 | 311.53 |  |  | 0 | 0 | 0 | -1 | -1 | 0 | 0 | 0 |
| TR163301|c0_g1|m.59293 | Vitis vinifera | Putative uncharacterized protein | VIT_06s0004g07060 | 644.9 |  |  |  |  |  |  | 0 | 0 | 0 | 0 | 0 | 0 | 0 | 0 |
| TR159752|c1_g2|m.14149 | Vitis vinifera | Putative uncharacterized protein | VIT_10s0003g04390 | 477.97 |  |  | 9.3793 | 7.9137 |  | 7.386 | 0 | 0 | 1 | 1 | 0 | 0 | 0 | 0 |
| TR130112|c0_g2|m.6916 | Glycine max | Uncharacterized protein | Gma.51865 | 681600 | 5465.8 | 5647.7 | 6760.5 | 4266.2 | 20432 | 20286 | 0 | 0 | 0 | 1 | 1 | 0 | 1 | 1 |
| TR130113|c0_g1|m.57618 | Vitis vinifera | Putative uncharacterized protein | VIT_02s0154g00140 | 5706.4 | 53.003 | 58.5 | 72.92 | 46.248 | 313.89 | 52.516 | 1 | 1 | 0 | 0 | 0 | 0 | 0 | 0 |
| TR130125|c0_g1|m.27358 | Beta vulgaris | Nitrite reductase | NiR | 1342.7 |  |  |  | 5.5657 | 115.94 | 139.53 | 1 | 1 | 1 | 1 | 0 | 0 | 0 | 0 |
| TR130129|c3_g1|m.3767 | Medicago truncatula | Uncharacterized protein |  | 86076 | 197.89 | 283.75 | 79.391 | 62.528 | 6095.2 | 5127.2 | 0 | 0 | 0 | 1 | 1 | 0 | 1 | 1 |
| TR154937|c5_g18|m.48989 | Medicago truncatula | Miraculin | MTR_6g078280 | 620610 | 3867.2 | 4496.9 | 1509.2 | 682.35 | 32199 | 36310 | 0 | 0 | -1 | 1 | 1 | -1 | 1 | 1 |
| TR130129|c3_g14|m.17235 | Populus nigra | Kunitz-type trypsin inhibitor B2 |  | 36087 |  |  |  |  |  |  | 0 | 0 | 0 | 0 | 0 | 0 | 0 | 0 |
| TR130129|c3_g4|m.27797 | Avicennia marina | Putative uncharacterized protein |  | 64083 | 41.714 | 17.287 | 163.97 | 130.2 | 281.77 | 276.81 | 1 | 1 | 1 | 1 | 1 | 1 | 1 | 1 |
| TR130129|c3_g5|m.33948 | Helianthus annuus | Kunitz-like protease inhibitor (Fragment) | PI | 52835 | 984.64 | 1006.7 | 47.073 |  | 966.53 | 870.38 | 0 | 0 | -1 | 0 | 0 | -1 | 0 | 0 |
| TR130129|c3_g8|m.45890 | Glycine max | Uncharacterized protein | Gma.30435 | 73981 | 156.51 |  | 59.898 | 28.911 | 992.88 | 1146.8 | 0 | 0 | 0 | 0 | 1 | 0 | 0 | 1 |
| TR140367|c1_g6|m.55735 | Hordeum vulgare | Beta tubulin 4 | tub4 | 50467 | 190.71 | 104.44 | 491.41 | 621.18 | 830.46 | 999.62 | 1 | 1 | 1 | 1 | 0 | 1 | 1 | 0 |
| TR130140|c0_g1|m.46414 | Vitis vinifera | Elongation factor Ts | VIT_11s0016g03510 | 2685.9 | 30.749 | 28.087 | 36.979 |  | 52.87 |  | 1 | 1 | 0 | 0 | 0 | 0 | 0 | 0 |
| TR130140|c0_g2|m.43901 | Vitis vinifera | Elongation factor Ts | VIT_11s0016g03510 | 15492 | 471.01 | 116.31 | 157.28 | 144.48 | 90.585 | 452.51 | 0 | 0 | 0 | 0 | 0 | 0 | 0 | 0 |
| TR130140|c1_g1|m.45919 | Vitis vinifera | Elongation factor Ts | VIT_11s0016g03510 | 2379.2 | 76.93 | 74.11 | 73.157 | 68.857 |  |  | 0 | -1 | 0 | -1 | -1 | 0 | 0 | 0 |
| TR154916|c0_g3|m.27438 | Vitis vinifera | Putative uncharacterized protein | VIT_05s0020g02860 | 8605.8 |  |  |  |  |  |  | 0 | 0 | 0 | 0 | 0 | 0 | 0 | 0 |
| TR130175|c0_g2|m.5816 | Vitis vinifera | Putative uncharacterized protein | VIT_16s0050g00960 | 513.67 | 44.006 | 15.223 |  |  |  |  | 0 | 0 | -1 | -1 | 0 | 0 | 0 | 0 |
| TR130186|c0_g8|m.51108 | Vitis vinifera | Cyanate hydratase 2 | CYN2 | 1509.8 |  |  |  |  |  |  | 0 | 0 | 0 | 0 | 0 | 0 | 0 | 0 |
| TR130186|c1_g6|m.28773 | Vitis vinifera | Cyanate hydratase 2 | CYN2 | 63442 | 780.72 | 796.39 | 294.64 | 424.68 | 1787.6 | 1780.7 | 0 | 0 | -1 | 1 | 1 | -1 | 1 | 1 |
| TR131578|c0_g1|m.49798 | Glycine max | Uncharacterized protein | Gma.19983 | 119.39 |  | 16.996 |  |  |  |  | 0 | 0 | -1 | -1 | 0 | 0 | 0 | 0 |
| TR130190|c2_g2|m.459 | Ricinus communis | Acetyl-CoA synthetase, putative | RCOM_1443610 | 12051 | 127.69 | 115.93 | 170 | 103.8 | 233.34 | 213.72 | 1 | 1 | 0 | 1 | 0 | 0 | 1 | 0 |
| TR130199|c0_g1|m.46659 | Ricinus communis | Pepsin A, putative | RCOM_0308790 | 70783 | 1371.5 | 822.3 | 1097.5 | 643.13 | 1452.8 | 417.93 | 0 | -1 | 0 | 0 | 0 | 0 | 0 | 0 |
| TR130199|c1_g1|m.44390 | Ricinus communis | Pepsin A, putative | RCOM_0308790 | 3175.9 | 111.7 | 140.86 | 109.81 | 89.703 | 229.25 | 63.158 | 0 | 0 | 0 | 0 | 0 | 0 | 0 | 0 |
| TR130202|c0_g8|m.55297 | Populus trichocarpa | Predicted protein | POPTRDRAFT_820395 | 6815.1 |  | 15.6 |  |  | 227.72 | 165.39 | 0 | 0 | -1 | 0 | 1 | 0 | 0 | 0 |
| TR130222|c0_g2|m.18811 | Mesembryanthemum nodiflorum | Carbonic anhydrase | CA2 | 1631000 | 15641 | 14702 | 6057.5 | 5946.3 | 52017 | 47081 | 0 | 0 | -1 | 1 | 1 | -1 | 1 | 1 |
| TR130232|c1_g5|m.36809 | Mesembryanthemum nodiflorum | Carbonic anhydrase | CA2 | 12078 | 260.27 |  | 138.67 | 16.834 | 1634.3 | 1773.3 | 0 | 0 | 0 | 0 | 1 | 0 | 0 | 1 |
| TR145083|c0_g7|m.40113 | Ricinus communis | 4-hydroxyphenylpyruvate dioxygenase | RCOM_1192240 | 11161 | 27.788 | 85.902 | 162.52 | 129.07 | 19.22 |  | 0 | 0 | 0 | 0 | 0 | 0 | 0 | 0 |
| TR130244|c0_g1|m.13888 | Populus trichocarpa | Shikimate kinase-like protein | SKL | 226.71 |  | 24.719 |  |  |  |  | 0 | 0 | -1 | -1 | 0 | 0 | 0 | 0 |
| TR163262|c0_g10|m.57948 | Glycine max | Uncharacterized protein | Gma.540 | 566.78 | 66.745 |  |  |  |  |  | 0 | 0 | -1 | -1 | 0 | 0 | 0 | 0 |
| TR86544|c0_g1|m.43871 | Vitis vinifera | Putative uncharacterized protein | VITISV_041895 | 42392 | 721.09 | 917.33 | 1096.5 | 763.53 | 409.43 | 608.1 | 0 | 0 | 0 | 0 | 0 | 0 | 0 | 0 |
| TR152806|c2_g1|m.20473 | Vitis vinifera | Putative uncharacterized protein | VIT_05s0102g01210 | 2442.3 |  | 33.63 |  | 20.824 | 24.972 | 49.666 | 0 | 0 | 0 | 0 | 0 | 0 | 0 | 0 |
| TR130412|c0_g1|m.8360 | Ricinus communis | Ceramidase, putative | RCOM_0731110 | 1202.9 | 30.897 |  |  | 22.149 | 85.547 |  | 0 | 0 | 0 | 0 | 0 | 0 | 0 | 0 |
| TR164816|c0_g2|m.52230 | Vitis vinifera | Putative uncharacterized protein | VIT_07s0104g00380 | 721.61 |  | 20.775 | 37.371 | 9.1458 |  |  | 0 | -1 | 0 | -1 | -1 | 0 | 0 | 0 |
| TR130439|c0_g1|m.5946 | Ricinus communis | Zinc finger protein, putative | RCOM_0610850 | 364.25 | 123.48 | 48.494 |  |  |  | 32.09 | 0 | 0 | -1 | 0 | 1 | 0 | 0 | 0 |
| TR154575|c0_g4|m.32949 | Arabidopsis lyrata | Ribosomal protein S5 family protein | ARALYDRAFT_482332 | 16534 | 416.75 | 98.722 | 283.83 | 222.3 | 372.38 | 329.43 | 1 | 1 | 0 | 0 | 0 | 0 | 0 | 0 |
| TR146169|c0_g3|m.44268 | Erythroxylum coca | Tropinone reductase-like 3 |  | 22620 | 216.44 | 157.95 | 96.525 | 22.265 | 596.94 | 549.35 | 0 | 0 | 0 | 1 | 1 | 0 | 1 | 1 |
| TR92980|c0_g1|m.54605 | Ricinus communis | Aldo-keto reductase, putative | RCOM_1450950 | 26272 | 75.826 | 141.06 | 415.64 | 322.99 | 1091.4 | 1757.6 | 1 | 1 | 1 | 0 | 0 | 1 | 0 | 0 |
| TR130453|c1_g3|m.28938 | Medicago truncatula | Albumin-2 | MTR_8g037670 | 54965 |  |  |  |  | 822.91 | 469.99 | 0 | 0 | 0 | 1 | 1 | 0 | 0 | 0 |
| TR130460|c0_g4|m.24436 | Vitis vinifera | Putative uncharacterized protein | VIT_02s0025g04710 | 1921.9 | 26.693 | 3.3803 | 152.9 | 55.412 | 34.226 | 42.065 | 0 | 0 | 0 | 0 | 0 | 0 | 0 | 0 |
| TR130462|c0_g2|m.60640 | Vitis vinifera | Putative uncharacterized protein | VIT_13s0067g02640 | 132.19 |  |  |  |  |  |  | 0 | 0 | 0 | 0 | 0 | 0 | 0 | 0 |
| TR130469|c0_g1|m.834 | Vitis vinifera | Putative uncharacterized protein | VIT_03s0063g02100 | 7212.2 | 116.57 | 164.52 | 162.04 | 64.552 | 66.637 |  | 0 | -1 | 0 | 0 | 0 | 0 | 0 | 0 |
| TR130490|c0_g5|m.7758 | Vitis vinifera | Putative uncharacterized protein | VIT_01s0127g00270 | 2270.5 |  |  |  |  |  |  | 0 | 0 | 0 | 0 | 0 | 0 | 0 | 0 |
| TR91307|c0_g1|m.3900 | Vitis vinifera | Putative uncharacterized protein | VIT_07s0005g01220 | 2473.3 |  | 16.109 | 65.505 |  | 91.018 |  | 1 | 1 | 0 | 0 | 0 | 0 | 0 | 0 |
| TR130496|c1_g5|m.15515 | Vitis vinifera | Putative uncharacterized protein | VIT_02s0025g02430 | 11824 | 110.14 |  |  |  | 728.99 | 922.31 | 0 | 0 | -1 | 0 | 1 | 0 | 0 | 0 |
| TR130499|c0_g4|m.50155 | Arachis hypogaea | Putative uncharacterized protein |  | 3802.9 | 100.43 | 109.24 | 11.493 |  | 122.35 |  | 0 | 0 | 0 | 0 | 0 | 0 | 0 | 0 |
| TR130499|c0_g8|m.58763 | Vitis vinifera | Putative uncharacterized protein | VIT_06s0004g00890 | 33129 | 1063.4 | 956.57 | 300.86 | 291.22 | 851.32 | 273.56 | 0 | 0 | -1 | 0 | 0 | -1 | 0 | 0 |
| TR130520|c0_g4|m.44382 | Populus trichocarpa | Predicted protein | POPTRDRAFT_820318 | 18493 | 78.707 | 176.99 | 149.07 | 142.61 | 180.74 | 70.205 | 0 | 0 | 0 | 0 | 0 | 0 | 0 | 0 |
| TR130526|c0_g2|m.7663 | Ricinus communis | Chaperone clpb, putative | RCOM_0921740 | 1196.3 |  |  | 9.128 | 10.03 | 54.078 | 55.417 | 1 | 1 | 1 | 1 | 1 | 0 | 0 | 1 |
| TR130529|c1_g1|m.23697 |  |  |  | 1863.6 | 97.281 | 81.849 | 206.16 | 141.04 |  |  | 0 | 0 | 0 | -1 | -1 | 0 | 0 | 0 |
| TR130529|c1_g9|m.4551 |  |  |  | 1197.3 | 90.718 | 21.212 | 78.851 | 38.085 | 31.623 | 42.122 | 0 | 0 | 0 | 0 | 0 | 0 | 0 | 0 |
| TR49312|c7_g18|m.35465 |  |  |  | 202260 | 2700.9 | 3105.3 | 1330.2 | 1068.9 | 3832.1 | 3384.7 | 0 | 0 | -1 | 0 | 1 | -1 | 0 | 1 |
| TR130555|c0_g2|m.5978 | Vitis vinifera | Putative uncharacterized protein | VIT_14s0068g01120 | 9139.4 | 94.607 | 159.3 | 72.192 | 129.9 | 122.46 | 30.48 | 0 | -1 | 0 | 0 | 0 | 0 | 0 | 0 |
| TR130556|c2_g1|m.17002 | Vitis vinifera | Putative uncharacterized protein | VIT_00s0283g00020 | 29647 | 362.24 | 368.31 | 329.72 | 189.31 | 750.85 | 400.51 | 0 | 0 | 0 | 0 | 0 | 0 | 0 | 0 |
| TR144379|c0_g6|m.13708 | Glycine max | Uncharacterized protein | Gma.24608 | 19805 | 428.81 | 848.81 |  |  | 843.23 | 1163.1 | 0 | 0 | -1 | 0 | 1 | 0 | 0 | 0 |
| TR130595|c3_g9|m.23045 | Sorghum bicolor | Putative uncharacterized protein Sb03g039360 | Sb03g039360 | 1132.4 |  |  |  |  |  |  | 0 | 0 | 0 | 0 | 0 | 0 | 0 | 0 |
| TR130601|c1_g9|m.12076 | Vitis vinifera | Putative uncharacterized protein | VIT_14s0060g02410 | 217.61 |  | 2.4021 |  | 19.304 |  |  | 0 | 0 | 0 | -1 | -1 | 0 | 0 | 0 |
| TR88358|c0_g3|m.19330 | Populus trichocarpa | Predicted protein | POPTRDRAFT_818738 | 93330 | 256.03 | 700.89 | 696.33 | 705.1 | 3691.9 | 3855.3 | 1 | 1 | 0 | 1 | 1 | 0 | 1 | 1 |
| TR130612|c0_g1|m.49614 | Vitis vinifera | Putative uncharacterized protein | VIT_14s0060g01030 | 825.4 | 16.092 | 33.114 | 73.112 |  |  |  | 0 | 0 | 0 | -1 | -1 | 0 | 0 | 0 |
| TR46559|c0_g1|m.34170 | Ricinus communis | Microsomal signal peptidase 18 kDa subunit, putative | RCOM_0899010 | 1448 |  |  | 69.531 | 16.404 |  |  | 0 | 0 | 1 | 0 | -1 | 0 | 0 | 0 |
| TR130613|c2_g1|m.27951 | Vitis vinifera | Putative uncharacterized protein | VIT_09s0002g02330 | 25007 | 410.91 | 142.16 | 328.33 | 295.11 | 257.5 | 250.25 | 0 | 0 | 0 | 0 | 0 | 0 | 0 | 0 |
| TR56104|c0_g1|m.34704 | Dianthus caryophyllus | Aquaporin | PIP2 | 26761 | 173.97 | 142.24 | 845.99 | 552.9 | 626.51 | 473.24 | 0 | 0 | 0 | 1 | 0 | 0 | 1 | 0 |
| TR130615|c2_g7|m.1515 | Manihot esculenta | Aquaporin | AQP | 1204.4 |  |  |  |  |  | 109.25 | 0 | 0 | 0 | 1 | 1 | 0 | 0 | 0 |
| TR130791|c2_g1|m.59804 | Vitis vinifera | Putative uncharacterized protein | VIT_13s0019g05360 | 820.66 |  |  |  |  |  |  | 0 | 0 | 0 | 0 | 0 | 0 | 0 | 0 |
| TR139757|c0_g1|m.18601 | Populus trichocarpa | Predicted protein | POPTRDRAFT_823462 | 1750.4 |  |  |  |  | 107.17 | 92.006 | 0 | 0 | 0 | 1 | 1 | 0 | 0 | 0 |
| TR130647|c0_g1|m.11315 | Populus trichocarpa | Predicted protein | POPTRDRAFT_1117997 | 18733 | 177.84 | 66.223 | 90.981 |  | 438.69 | 548.27 | 0 | 0 | 0 | 1 | 0 | 0 | 1 | 0 |
| TR138800|c0_g6|m.40459 | Citrus paradisi | Serpin-like protein (Fragment) |  | 21552 | 218.13 | 907.84 | 279.86 | 188.06 | 223.78 | 313.79 | 0 | 0 | 0 | 0 | 0 | 0 | 0 | 0 |
| TR130649|c0_g6|m.2944 | Vitis vinifera | Putative uncharacterized protein | VITISV_021647 | 27190 | 386.93 | 245.97 | 179.64 | 49.809 |  | 1143.7 | 0 | 0 | 0 | 0 | 0 | 0 | 0 | 0 |
| TR130650|c1_g6|m.26728 | Ricinus communis | Putative uncharacterized protein | RCOM_1582990 | 30205 | 577.18 | 451.23 |  |  | 354.61 | 539.24 | 0 | 0 | -1 | 0 | 1 | 0 | 0 | 0 |
| TR130650|c1_g33|m.61839 | Populus trichocarpa | Predicted protein | POPTRDRAFT_1095709 | 7191.2 |  | 234.35 | 135.72 |  | 225.14 |  | 0 | 0 | 0 | 0 | 0 | 0 | 0 | 0 |
| TR130654|c0_g1|m.11301 | Beta vulgaris | Calmcium/calmodulin-dependent protein kinase CDPK2 |  | 490.05 |  |  |  |  | 92.292 |  | 0 | 0 | 0 | 1 | 1 | 0 | 0 | 0 |
| TR140345|c0_g2|m.38720 | Arabidopsis lyrata | Putative uncharacterized protein | ARALYDRAFT_355122 | 7942.4 | 148.43 | 206.66 | 191.59 | 135.81 |  |  | 0 | -1 | 0 | -1 | -1 | 0 | 0 | 0 |
| TR130664|c0_g1|m.60678 | Arabidopsis lyrata | Putative uncharacterized protein | ARALYDRAFT_477281 | 539.89 |  | 36.86 | 69.353 | 51.341 |  |  | 0 | 0 | 0 | -1 | -1 | 0 | 0 | 0 |
| TR130669|c0_g1|m.53395 | Vitis vinifera | Putative uncharacterized protein | VIT_08s0040g02540 | 2463.6 |  | 57.457 |  | 37.608 |  |  | 0 | -1 | 0 | -1 | -1 | 0 | 0 | 0 |
| TR7310|c0_g3|m.21133 | Vitis vinifera | Putative uncharacterized protein | VITISV_040294 | 4958.9 | 47.388 |  | 59.35 | 74.244 |  | 154.09 | 1 | 1 | 0 | 0 | 0 | 0 | 0 | 0 |
| TR130698|c0_g1|m.42596 | Castanea sativa | Dual protein phosphatase 4 | DSP4 | 68783 | 635.37 | 690.18 | 432.45 | 259.9 | 2157.9 | 1852 | 0 | 0 | 0 | 1 | 1 | 0 | 1 | 1 |
| TR130702|c0_g2|m.47947 | Ricinus communis | Zeta-carotene desaturase, chloroplast, putative | RCOM_1428040 | 447 | 18.233 |  |  |  |  |  | 0 | 0 | -1 | -1 | 0 | 0 | 0 | 0 |
| TR5129|c0_g1|m.10222 | Ricinus communis | Cytochrome B5 isoform 1, putative | RCOM_1720370 | 95.53 |  |  |  |  |  |  | 0 | 0 | 0 | 0 | 0 | 0 | 0 | 0 |
| TR130820|c0_g1|m.956 | Glycine max | Uncharacterized protein | Gma.20839 | 1158.2 |  |  | 9.6603 | 4.1066 | 56.965 | 17.197 | 1 | 1 | 1 | 1 | 0 | 0 | 0 | 0 |
| TR131763|c0_g1|m.20964 | Glycine max | Uncharacterized protein | Gma.44142 | 1733.9 |  | 54.361 |  |  |  | 207 | 0 | 0 | -1 | 0 | 1 | 0 | 0 | 0 |
| TR130829|c1_g2|m.6872 | Amaranthus hypochondriacus | Mitochondrial protoporphyrinogen oxidase | PPX2L | 283.56 |  |  |  |  |  |  | 0 | 0 | 0 | 0 | 0 | 0 | 0 | 0 |
| TR130833|c0_g1|m.58754 | Vitis vinifera | Putative uncharacterized protein | VIT_02s0025g00690 | 237.13 | 25.256 |  | 33.464 |  | 23.469 |  | 0 | 0 | 0 | 0 | 0 | 0 | 0 | 0 |
| TR130846|c0_g3|m.3606 | Glycine max | Uncharacterized protein | Gma.2640 | 58726 | 641.47 | 834.58 | 338.67 | 292.54 | 1438.6 | 655.74 | 0 | 0 | 0 | 0 | 0 | 0 | 0 | 0 |
| TR139869|c0_g2|m.45523 | Populus trichocarpa | Predicted protein | POPTRDRAFT_748333 | 9632.3 | 106.1 | 100.6 | 103.8 | 8.0912 | 127.13 |  | 0 | 0 | 0 | 0 | 0 | 0 | 0 | 0 |
| TR130849|c1_g1|m.44540 | Vitis vinifera | Putative uncharacterized protein | VIT_14s0066g01900 | 173.2 |  |  | 40.04 | 37.884 |  |  | 0 | 0 | 1 | 0 | -1 | 0 | 0 | 0 |
| TR150050|c0_g1|m.55327 | Vitis vinifera | Putative uncharacterized protein | VIT_17s0000g04750 | 267.97 |  |  |  |  |  |  | 0 | 0 | 0 | 0 | 0 | 0 | 0 | 0 |
| TR130887|c1_g3|m.45215 | Glycine max | N-hydroxycinnamoyl/benzoyltransferase 1 |  | 4758.5 | 106.23 | 57.649 | 2635.3 |  |  |  | 0 | 0 | 1 | -1 | -1 | 1 | 0 | 0 |
| TR160886|c0_g1|m.3041 | Arabidopsis lyrata | Putative uncharacterized protein | ARALYDRAFT_480305 | 3591.8 |  |  |  |  | 321.74 |  | 0 | 0 | 0 | 1 | 1 | 0 | 0 | 0 |
| TR130971|c1_g6|m.3332 | Solanum lycopersicum | Homogentisate 1,2-dioxygenase (Fragment) | HGO | 971.41 |  |  |  | 33.821 |  |  | 0 | 0 | 1 | 0 | -1 | 0 | 0 | 0 |
| TR130975|c0_g4|m.10911 | Medicago truncatula | Transmembrane 9 superfamily protein member | MTR_6g074910 | 773.97 | 17.124 |  |  | 122.92 |  |  | 0 | 0 | 0 | -1 | -1 | 0 | 0 | 0 |
| TR130976|c0_g1|m.19301 | Ricinus communis | Transitional endoplasmic reticulum ATPase, putative | RCOM_1355070 | 82683 | 863.21 | 1097.2 | 742.91 | 673.4 | 1674.3 | 1943.8 | 0 | 0 | 0 | 1 | 1 | 0 | 1 | 1 |
| TR130981|c0_g12|m.2240 | Rheum australe | Low-temperature inducible |  | 25160 |  |  | 908.84 | 799.09 |  |  | 0 | 0 | 1 | 0 | -1 | 0 | 0 | 0 |
| TR130981|c0_g5|m.19434 | Rheum australe | Low-temperature inducible |  | 1759.4 |  |  |  |  | 23.892 |  | 0 | 0 | 0 | 1 | 1 | 0 | 0 | 0 |
| TR94052|c0_g1|m.17505 | Chenopodium rubrum | Auxin-induced beta-glucosidase |  | 339.37 |  |  |  |  |  |  | 0 | 0 | 0 | 0 | 0 | 0 | 0 | 0 |
| TR130992|c0_g1|m.57730 | Petunia hybrida | 3-ketoacyl CoA thiolase 1 |  | 4473.4 |  |  | 17.626 |  |  |  | 0 | 0 | 1 | 0 | -1 | 0 | 0 | 0 |
| TR130998|c0_g4|m.32972 | Vitis vinifera | Putative uncharacterized protein | VIT_14s0128g00370 | 29204 | 371.31 | 66.868 | 258.12 |  | 1059.5 | 1003.3 | 1 | 1 | 0 | 1 | 1 | 0 | 1 | 1 |
| TR131003|c0_g1|m.21112 | Litchi chinensis | PAE |  | 5639.4 | 116.99 | 135.15 |  | 49.408 | 61.146 |  | 0 | 0 | 0 | 0 | 0 | 0 | 0 | 0 |
| TR131011|c2_g1|m.44078 | Ricinus communis | S-adenosylmethionine synthetase, putative | RCOM_1436370 | 4973.9 |  |  | 50.005 | 34.891 |  |  | 0 | 0 | 1 | 0 | -1 | 0 | 0 | 0 |
| TR131028|c0_g2|m.27594 | Vitis vinifera | Putative uncharacterized protein | VIT_03s0088g00260 | 270.23 |  |  |  |  |  |  | 0 | 0 | 0 | 0 | 0 | 0 | 0 | 0 |
| TR132312|c0_g1|m.12935 | Populus trichocarpa | Predicted protein | POPTRDRAFT_593803 | 87.059 |  |  |  |  |  |  | 0 | 0 | 0 | 0 | 0 | 0 | 0 | 0 |
| TR151644|c0_g1|m.52457 | Arabidopsis thaliana | Aluminum induced protein with YGL and LRDR motifs | AILP1 | 3975.8 |  |  |  |  |  |  | 0 | 0 | 0 | 0 | 0 | 0 | 0 | 0 |
| TR131550|c1_g10|m.51580 | Vitis vinifera | Chaperone protein DnaJ 1 | dnaJ1 | 6725.5 | 139.54 | 126.66 | 232.84 | 126.47 |  | 79.601 | 0 | 0 | 0 | 0 | 0 | 0 | 0 | 0 |
| TR131556|c4_g1|m.56810 | Vitis vinifera | Putative uncharacterized protein | VIT_14s0006g02470 | 14088 | 347.55 | 230.08 | 627.18 | 415.39 |  | 92.716 | 0 | 0 | 0 | 0 | 0 | 0 | 0 | 0 |
| TR86508|c0_g7|m.22526 | Populus trichocarpa | Predicted protein | POPTRDRAFT_817164 | 844.13 |  |  | 58.615 |  |  |  | 0 | 0 | 1 | 0 | -1 | 0 | 0 | 0 |
| TR51457|c0_g2|m.54455 | Gossypium hirsutum | Dimethylmenaquinone methyltransferase |  | 39684 | 567.47 | 627.91 | 329.77 | 382.58 | 568.46 | 931.44 | 0 | 0 | -1 | 0 | 0 | -1 | 0 | 0 |
| TR85367|c5_g2|m.5435 | Bacopa monnieri | Acetyl-CoA C-acetyltransferase |  | 16669 |  | 28.776 | 50.122 | 13.404 | 148.47 | 891.17 | 0 | 0 | 0 | 0 | 0 | 0 | 0 | 0 |
| TR97989|c3_g8|m.37437 | Solanum tuberosum | 26S proteasome AAA-ATPase subunit RPT4a | StRPT4a | 30844 |  | 84.033 |  |  |  | 1776 | 0 | 0 | -1 | 0 | 1 | 0 | 0 | 0 |
| TR131571|c0_g6|m.28576 | Mirabilis jalapa | Beta expansin EXPB2.1 | ExpB2.1 | 168230 | 3454.1 | 1920.7 | 3704.3 | 2553.9 | 2084.5 | 3040.4 | 0 | 0 | 0 | 0 | 0 | 0 | 0 | 0 |
| TR160593|c2_g4|m.3513 | Populus trichocarpa | Predicted protein | POPTRDRAFT_830957 | 3858.8 |  |  |  |  |  | 232.5 | 0 | 0 | 0 | 1 | 1 | 0 | 0 | 0 |
| TR131583|c0_g1|m.49948 | Medicago truncatula | Nucleotide pyrophosphatase/phosphodiesterase | MTR_4g103520 | 1807 | 41.575 | 38.509 | 28.428 | 15.704 |  |  | 0 | -1 | 0 | -1 | -1 | 0 | 0 | 0 |
| TR131594|c0_g2|m.24922 | Vitis vinifera | Pyruvate kinase | VIT_02s0012g01170 | 2177.2 |  | 59.608 | 22.919 | 17.765 |  | 35.785 | 0 | 0 | 0 | 0 | 0 | 0 | 0 | 0 |
| TR94635|c0_g1|m.28955 | Vitis vinifera | Putative uncharacterized protein | VIT_00s0220g00120 | 14301 | 130.13 | 133.4 | 152.67 | 160.85 | 23.191 | 114.86 | 0 | 0 | 0 | 0 | 0 | 0 | 0 | 0 |
| TR131620|c0_g3|m.11132 | Vitis vinifera | Putative uncharacterized protein | VIT_01s0010g02050 | 3221.3 |  |  |  | 69.4 |  |  | 0 | 0 | 1 | 0 | -1 | 0 | 0 | 0 |
| TR131623|c0_g1|m.29930 | Ricinus communis | Thiopurine S-methyltransferase, putative | RCOM_1268870 | 2303.1 |  |  | 12.61 |  |  |  | 0 | 0 | 1 | 0 | -1 | 0 | 0 | 0 |
| TR131626|c0_g3|m.42490 | Vitis vinifera | Putative uncharacterized protein | VIT_03s0088g00960 | 1350.3 |  |  |  |  |  | 269.6 | 0 | 0 | 0 | 1 | 1 | 0 | 0 | 0 |
| TR49366|c0_g1|m.55354 | Populus trichocarpa | Iaa-amino acid hydrolase 11 | ILL11 | 477.84 | 40.652 | 55.455 | 45.592 |  |  | 154.03 | 0 | 0 | 0 | 0 | 0 | 0 | 0 | 0 |
| TR97339|c1_g1|m.28474 | Nicotiana tabacum | Acyl-carrier-protein S-malonyltransferase | MT | 639.45 |  |  |  | 60.04 |  |  | 0 | 0 | 1 | 0 | -1 | 0 | 0 | 0 |
| TR17887|c0_g1|m.6177 | Kalidium foliatum | Putative K(+)-stimulated pyrophosphate-energized sodium pump | hppA | 124270 | 1720.2 | 2437.4 | 787.27 | 823.28 | 2076.2 | 1734.2 | 0 | 0 | 0 | 0 | 1 | 0 | 0 | 1 |
| TR131644|c0_g3|m.46952 | Vitis vinifera | Putative uncharacterized protein | VIT_11s0052g00660 | 45457 | 1020 | 1349.8 | 470.02 | 392.21 | 901.96 | 679.93 | 0 | 0 | -1 | 0 | 0 | -1 | 0 | 0 |
| TR162606|c0_g1|m.23786 | Populus trichocarpa | Putative uncharacterized protein |  | 12567 | 97.82 |  | 159.85 | 28.67 | 203.02 | 441.07 | 0 | 0 | 0 | 0 | 0 | 0 | 0 | 0 |
| TR162606|c0_g1|m.23787 | Populus trichocarpa | Predicted protein | POPTRDRAFT_718123 | 3480.7 | 111.95 | 42.807 | 73.254 | 161.72 | 105.83 |  | 0 | 0 | 0 | 0 | 0 | 0 | 0 | 0 |
| TR131743|c0_g1|m.29804 | Populus trichocarpa | Predicted protein | POPTRDRAFT_1096618 | 12753 | 290.23 | 345.56 | 191.05 | 127.27 | 18.417 | 243.75 | 0 | -1 | 0 | 0 | 0 | 0 | 0 | 0 |
| TR131747|c0_g1|m.19439 | Medicago truncatula | Putative uncharacterized protein (Fragment) |  | 15926 | 386.44 | 318.8 | 355.86 | 221.07 | 25.642 |  | 0 | -1 | 0 | 0 | 0 | 0 | 0 | 0 |
| TR41816|c0_g1|m.16262 | Ricinus communis | Putative uncharacterized protein | RCOM_1077700 | 2402.9 | 46.8 |  | 25.685 |  |  |  | 0 | -1 | 0 | -1 | -1 | 0 | 0 | 0 |
| TR136941|c1_g1|m.30047 | Vitis vinifera | 6-phosphogluconate dehydrogenase, decarboxylating | VIT_02s0025g00900 | 5632.2 | 23.162 | 76.98 | 28.359 | 101.15 | 89.051 | 55.715 | 1 | 1 | 0 | 0 | 0 | 0 | 0 | 0 |
| TR97493|c0_g1|m.21283 | Ricinus communis | GTP-binding protein, putative | RCOM_1576430 | 2918.6 |  | 177.41 |  |  |  | 169.36 | 0 | 0 | -1 | 0 | 1 | 0 | 0 | 0 |
| TR132252|c0_g1|m.33189 | Vitis vinifera | Putative uncharacterized protein | VIT_08s0007g03250 | 1804.8 |  |  |  |  |  |  | 0 | 0 | 0 | 0 | 0 | 0 | 0 | 0 |
| TR99643|c0_g1|m.28880 | Vitis vinifera | Putative uncharacterized protein | VIT_18s0122g00890 | 1434.7 | 48.581 | 46.308 | 18.842 | 24.736 | 47.108 |  | 0 | 0 | -1 | 0 | 0 | -1 | 0 | 0 |
| TR132279|c0_g11|m.42621 | Vitis vinifera | Putative uncharacterized protein | VIT_15s0046g03200 | 312.92 |  |  |  |  |  |  | 0 | 0 | 0 | 0 | 0 | 0 | 0 | 0 |
| TR132294|c1_g1|m.36735 | Medicago truncatula | Heme-binding-like protein | MTR_7g104650 | 939.21 |  |  |  |  |  |  | 0 | 0 | 0 | 0 | 0 | 0 | 0 | 0 |
| TR132298|c0_g3|m.11670 | Vitis vinifera | Putative uncharacterized protein | VIT_00s0516g00020 | 1323.7 | 18.82 | 27.342 | 40.409 | 48.718 |  |  | 0 | 0 | 0 | -1 | -1 | 0 | 0 | 0 |
| TR25238|c0_g2|m.11531 | Vitis vinifera | Putative uncharacterized protein | VITISV_012048 | 39631 | 259.18 | 364.81 | 239.32 | 197.57 | 1124.1 | 927.87 | 0 | 0 | 0 | 1 | 1 | 0 | 1 | 1 |
| TR132302|c0_g1|m.39183 | Populus trichocarpa | Predicted protein | POPTRDRAFT_757838 | 1146.7 |  |  | 15.06 |  |  | 40.028 | 1 | 1 | 1 | 1 | 0 | 0 | 0 | 0 |
| TR132306|c1_g1|m.23755 | Spinacia oleracea | Voltage-dependent anion channel protein | SVDAC1 | 103750 | 1826.3 | 1907.7 | 653.62 | 669.35 | 1285.4 | 2697.1 | 0 | 0 | -1 | 0 | 0 | -1 | 0 | 0 |
| TR132306|c2_g1|m.35811 | Spinacia oleracea | Voltage-dependent anion channel protein | SVDAC1 | 175620 | 2115.8 | 2864.4 | 1176.2 | 1135.8 | 3184.6 | 3326.5 | 0 | 0 | 0 | 0 | 1 | 0 | 0 | 1 |
| TR98508|c0_g7|m.3713 | Vitis vinifera | Putative uncharacterized protein | VIT_07s0141g00240 | 14302 |  | 81.05 | 553.42 | 80.632 |  | 605.51 | 1 | 1 | 0 | 0 | 0 | 0 | 0 | 0 |
| TR132315|c0_g8|m.57322 | Vitis vinifera | Putative uncharacterized protein | VIT_07s0141g00240 | 5885.9 | 22.914 |  | 9.7383 | 14.464 | 129.32 | 99.818 | 0 | 0 | 0 | 0 | 1 | 0 | 0 | 1 |
| TR132324|c1_g1|m.53911 | Vitis vinifera | Peptidyl-prolyl cis-trans isomerase | VITISV_002168 | 1059.8 |  |  |  |  |  | 126.65 | 0 | 0 | 0 | 1 | 1 | 0 | 0 | 0 |
| TR132328|c0_g2|m.34413 | Arabidopsis lyrata | Putative uncharacterized protein | ARALYDRAFT_487662 | 3388.7 | 38.948 | 19.051 |  | 53.862 | 53.465 |  | 0 | 0 | 0 | 0 | 0 | 0 | 0 | 0 |
| TR140338|c2_g1|m.18222 | Medicago truncatula | Putative uncharacterized protein | MTR_4g116130 | 3590 | 15.294 |  |  |  | 72.412 | 95.376 | 0 | 0 | -1 | 0 | 1 | 0 | 0 | 0 |
| TR132329|c0_g5|m.596 | Ricinus communis | Dtdp-glucose 4-6-dehydratase, putative | RCOM_0484660 | 8399.3 | 166.01 | 76.568 | 28.943 | 41.98 | 268.12 | 192.54 | 0 | 0 | 0 | 0 | 1 | 0 | 0 | 1 |
| TR81409|c0_g1|m.55336 | Vitis vinifera | Putative uncharacterized protein | VIT_09s0002g05110 | 1362.9 | 55.813 |  | 49.332 |  |  |  | 0 | -1 | 0 | -1 | -1 | 0 | 0 | 0 |
| TR94047|c0_g1|m.18061 | Vitis vinifera | ATP-dependent Clp protease proteolytic subunit | VIT_03s0091g00700 | 1376.7 | 62.334 | 45.749 | 27.768 |  |  |  | 0 | -1 | 0 | -1 | -1 | 0 | 0 | 0 |
| TR144476|c1_g2|m.43684 | Vitis vinifera | Putative uncharacterized protein | VIT_00s0233g00020 | 3556.4 | 106.5 | 52.682 |  | 29.902 | 36.962 | 125.76 | 0 | 0 | 0 | 0 | 0 | 0 | 0 | 0 |
| TR97380|c0_g1|m.39478 | Populus trichocarpa | Elongation factor Tu | POPTRDRAFT_1067026 | 173670 | 1920.8 | 2013.9 | 1173 | 980.65 | 5922.6 | 5864.4 | 0 | 0 | -1 | 1 | 1 | -1 | 1 | 1 |
| TR132364|c0_g1|m.1322 | Vitis vinifera | Putative uncharacterized protein | VIT_05s0020g04590 | 7729.7 | 47.206 | 26.752 | 87.238 | 42.081 | 153.46 | 336.08 | 1 | 1 | 0 | 0 | 0 | 0 | 0 | 0 |
| TR132365|c1_g12|m.49396 | Atriplex patens | rRNA N-glycosidase | RIP | 44165 |  | 22.986 |  |  |  |  | 0 | 0 | -1 | -1 | 0 | 0 | 0 | 0 |
| TR132365|c1_g8|m.60353 | Atriplex patens | rRNA N-glycosidase | RIP | 436500 | 1116.5 | 1183.5 | 3813 | 2633 | 2997.6 |  | 0 | 0 | 0 | 1 | 0 | 0 | 1 | 0 |
| TR132376|c0_g2|m.13028 | Arabidopsis lyrata | Putative uncharacterized protein | ARALYDRAFT_477124 | 903080 | 10949 | 12875 | 5611.9 | 4997.2 | 32014 | 36506 | 0 | 0 | -1 | 1 | 1 | -1 | 1 | 1 |
| TR85427|c0_g2|m.22867 | Ricinus communis | Phosphoglycerate kinase, putative | RCOM_1574570 | 1042700 | 9529.1 | 10615 | 5297.6 | 4366.6 | 37699 | 36860 | 0 | 0 | -1 | 1 | 1 | -1 | 1 | 1 |
| TR132380|c0_g3|m.32447 | Glycine max | Putative uncharacterized protein |  | 108460 | 1413.5 | 1111.8 | 623.92 | 1015.8 | 3751.8 | 3344.8 | 0 | 0 | 0 | 1 | 1 | 0 | 1 | 1 |
| TR132387|c0_g1|m.4455 | Populus trichocarpa | Predicted protein | POPTRDRAFT_593773 | 44616 | 46.193 | 115.77 | 619.9 | 561.6 | 715.76 | 547.19 | 1 | 1 | 1 | 1 | 0 | 1 | 1 | 0 |
| TR132397|c0_g2|m.26536 | Glycine max | Putative uncharacterized protein |  | 2168.4 |  |  | 118.64 | 112.09 |  |  | 0 | 0 | 1 | 0 | -1 | 0 | 0 | 0 |
| TR132414|c1_g3|m.56841 | Vitis vinifera | Cysteine synthase | VIT_15s0046g02300 | 9221.2 | 8.8948 |  | 144.64 | 60.029 | 398.89 | 405.38 | 1 | 1 | 0 | 1 | 1 | 0 | 1 | 1 |
| TR132419|c1_g1|m.24942 | Vitis vinifera | Putative uncharacterized protein | VIT_05s0077g02010 | 21482 | 446.6 | 285.97 | 272.61 | 151.79 | 498.34 | 550.6 | 0 | 0 | 0 | 0 | 1 | 0 | 0 | 1 |
| TR132423|c1_g7|m.50507 | Populus trichocarpa | Predicted protein | POPTRDRAFT_734872 | 4527.3 | 161.31 | 100.53 | 157.92 | 109.08 |  | 309.26 | 1 | 1 | 0 | 0 | 0 | 0 | 0 | 0 |
| TR132424|c1_g3|m.59421 | Boehmeria nivea | Putative auxin-binding protein 1 | abp1 | 7705.9 |  |  |  |  | 462.71 | 489.43 | 0 | 0 | 0 | 1 | 1 | 0 | 0 | 0 |
| TR132425|c2_g6|m.37169 | Vitis vinifera | Chloroplast chaperonin 21 | cpn21 | 2260.1 |  |  |  |  |  |  | 0 | 0 | 0 | 0 | 0 | 0 | 0 | 0 |
| TR132702|c0_g1|m.1811 | Vitis vinifera | Putative uncharacterized protein | VIT_01s0026g01340 | 700.37 |  |  |  |  |  |  | 0 | 0 | 0 | 0 | 0 | 0 | 0 | 0 |
| TR132723|c0_g6|m.42750 | Vitis vinifera | Putative uncharacterized protein | VIT_14s0081g00440 | 1780.9 |  |  |  |  |  |  | 0 | 0 | 0 | 0 | 0 | 0 | 0 | 0 |
| TR132724|c2_g2|m.7903 | Vitis vinifera | Putative uncharacterized protein | VIT_18s0122g00880 | 2296.8 | 62.562 | 75.693 | 77.722 | 91.702 |  |  | 0 | 0 | 0 | -1 | -1 | 0 | 0 | 0 |
| TR132734|c1_g2|m.39168 | Solanum lycopersicum | SGT1-2 |  | 3157.5 | 56.817 | 25.469 | 25.45 | 79.925 | 208.17 | 237 | 1 | 1 | 0 | 1 | 1 | 0 | 1 | 1 |
| TR86503|c0_g5|m.29389 | Vitis vinifera | Putative uncharacterized protein | VIT_07s0005g03660 | 1874.8 |  |  |  |  | 135.29 |  | 0 | 0 | 0 | 1 | 1 | 0 | 0 | 0 |
| TR132761|c1_g1|m.52136 | Mirabilis jalapa | Cyclo-DOPA 5-O-glucosyltransferase | cDOPA5GT | 811.15 |  |  |  |  |  |  | 0 | 0 | 0 | 0 | 0 | 0 | 0 | 0 |
| TR132772|c6_g1|m.39622 | Beta vulgaris | Major latex like protein homolog |  | 4941.6 |  |  |  | 27.525 |  |  | 0 | 0 | 1 | 0 | -1 | 0 | 0 | 0 |
| TR132772|c6_g11|m.18782 | Populus trichocarpa | Predicted protein | POPTRDRAFT_822077 | 123780 | 688.32 | 765.44 | 2513.8 | 2128 | 2122.7 | 2329 | 0 | 0 | 1 | 1 | 0 | 1 | 1 | 0 |
| TR149772|c0_g2|m.59515 | Vitis vinifera | Putative uncharacterized protein | VIT_04s0008g03800 | 565.4 |  |  |  |  |  |  | 0 | 0 | 0 | 0 | 0 | 0 | 0 | 0 |
| TR132785|c0_g2|m.54786 | Vitis vinifera | Putative uncharacterized protein | VIT_05s0077g00450 | 25649 | 247.73 | 93.062 | 147.43 | 101.37 | 326.44 | 1078.5 | 0 | 0 | 0 | 0 | 0 | 0 | 0 | 0 |
| TR85371|c0_g1|m.55607 | Medicago truncatula | ATP-dependent RNA helicase-like protein | MTR_1g086640 | 95.563 |  |  | 10.656 |  |  |  | 0 | 0 | 1 | 0 | -1 | 0 | 0 | 0 |
| TR132971|c1_g15|m.7409 | Ricinus communis | Putative uncharacterized protein | RCOM_1711490 | 107510 | 1099.3 | 1456.7 | 673.17 | 504.05 | 2818.4 | 2991.9 | 0 | 0 | 0 | 1 | 1 | 0 | 1 | 1 |
| TR132971|c1_g20|m.54279 | Ricinus communis | Putative uncharacterized protein | RCOM_1711490 | 2555.6 |  | 62.902 | 80.301 | 54.13 |  | 206.06 | 1 | 1 | 0 | 0 | 0 | 0 | 0 | 0 |
| TR132979|c1_g1|m.20013 | Ricinus communis | Lysosomal pro-X carboxypeptidase, putative | RCOM_0858830 | 41797 | 1235.2 | 793.27 | 780.78 | 680.18 |  | 305.2 | 0 | -1 | 0 | 0 | 0 | 0 | 0 | 0 |
| TR163339|c0_g6|m.30219 | Arabidopsis thaliana | Lysosomal Pro-X carboxypeptidase - like protein | F6H11.120 | 32259 | 85.342 | 108.52 | 71.033 | 97.631 | 1138.9 | 1316 | 0 | 0 | 0 | 1 | 1 | 0 | 1 | 1 |
| TR132996|c0_g5|m.38518 | Glycine max | Uncharacterized protein | Gma.45784 | 393.94 |  |  | 55.201 |  |  |  | 0 | 0 | 1 | 0 | -1 | 0 | 0 | 0 |
| TR144459|c0_g3|m.57770 | Glycine max | Uncharacterized protein |  | 2042.6 |  | 121.43 |  |  | 128.87 | 267.17 | 0 | 0 | -1 | 0 | 1 | 0 | 0 | 0 |
| TR137184|c0_g2|m.36554 | Ricinus communis | Signal recognition particle 68 kDa protein, putative | RCOM_1503780 | 1551.8 |  | 11.364 | 11.233 | 1.4301 | 57.364 | 146.51 | 0 | 0 | 0 | 0 | 0 | 0 | 0 | 0 |
| TR138612|c0_g2|m.48384 | Populus trichocarpa | Putative uncharacterized protein |  | 1116.7 |  |  | 25.93 | 16.86 |  |  | 0 | 0 | 1 | 0 | -1 | 0 | 0 | 0 |
| TR133013|c1_g1|m.59826 | Ricinus communis | Threonine synthase, putative | RCOM_1046290 | 2884.6 |  |  |  | 17.9 |  | 105.09 | 1 | 1 | 1 | 1 | 0 | 0 | 0 | 0 |
| TR148249|c0_g1|m.15472 | Vitis vinifera | Putative uncharacterized protein | VIT_10s0042g01200 | 214.48 |  |  |  |  |  |  | 0 | 0 | 0 | 0 | 0 | 0 | 0 | 0 |
| TR157020|c0_g1|m.31745 | Vitis vinifera | Putative uncharacterized protein | VIT_09s0002g02200 | 2593.6 | 38.335 | 58.26 | 53.918 | 13.035 |  |  | 0 | -1 | 0 | -1 | -1 | 0 | 0 | 0 |
| TR133035|c0_g1|m.23313 | Ricinus communis | Aspartic proteinase nepenthesin-2, putative | RCOM_1282640 | 5629.4 | 63.388 | 109.91 |  | 43.178 | 59.433 | 42.35 | 0 | 0 | 0 | 0 | 0 | 0 | 0 | 0 |
| TR133041|c2_g11|m.5629 | Lotus japonicus | Glutamate decarboxylase 1 | gad1 | 79403 | 1751.5 | 2590 | 120.48 | 99.594 | 5975.6 |  | 0 | 0 | -1 | 0 | 1 | -1 | 0 | 1 |
| TR133041|c2_g15|m.41327 | Nicotiana tabacum | Glutamate decarboxylase |  | 90268 | 251.3 | 1829.1 | 260.09 | 431.41 | 3237.4 | 4692.8 | 0 | 0 | 0 | 0 | 1 | 0 | 0 | 1 |
| TR133053|c2_g2|m.25725 | Vitis vinifera | Putative uncharacterized protein | VIT_08s0056g00110 | 284.11 | 3.753 |  |  |  |  | 80.106 | 0 | 0 | -1 | 0 | 1 | 0 | 0 | 0 |
| TR25369|c0_g2|m.6970 | Populus trichocarpa | Predicted protein | POPTRDRAFT_554044 | 4628.4 |  |  |  |  |  |  | 0 | 0 | 0 | 0 | 0 | 0 | 0 | 0 |
| TR137185|c0_g1|m.55749 | Gossypium hirsutum | Chloroplast biotin carboxylase | BC1 | 4820.9 | 13.364 | 43.602 | 37.78 |  |  | 64.592 | 1 | 1 | 0 | 0 | 0 | 0 | 0 | 0 |
| TR133073|c0_g3|m.48018 | Dianthus caryophyllus | Lipase (Fragment) |  | 274.43 |  |  |  |  |  |  | 0 | 0 | 0 | 0 | 0 | 0 | 0 | 0 |
| TR133074|c0_g16|m.30596 | Vitis vinifera | Putative uncharacterized protein | VIT_08s0007g03620 | 307970 | 3561.8 | 4354.9 | 1638.5 | 1556.3 | 7438.4 | 5034.5 | 0 | 0 | -1 | 0 | 0 | -1 | 0 | 0 |
| TR7274|c0_g1|m.34458 | Glycine max | Uncharacterized protein | Gma.33985 | 840.62 |  |  |  |  |  |  | 0 | 0 | 0 | 0 | 0 | 0 | 0 | 0 |
| TR133099|c3_g3|m.62029 | Ricinus communis | Malic enzyme | RCOM_1614520 | 8930.1 | 117.78 | 151.09 | 49.921 | 18.183 | 183.35 | 101.49 | 0 | 0 | -1 | 0 | 0 | -1 | 0 | 0 |
| TR4145|c0_g1|m.6600 | Vitis vinifera | Putative uncharacterized protein | VIT_11s0016g03650 | 669.01 |  | 13.782 | 22.902 | 20.486 | 46.536 |  | 1 | 1 | 0 | 0 | 0 | 0 | 0 | 0 |
| TR133108|c0_g13|m.48343 | Spinacia oleracea | Cystatin | CPI | 21211 | 309.66 | 324.07 | 197.08 | 198.04 | 290.23 | 808.16 | 0 | 0 | -1 | 0 | 0 | -1 | 0 | 0 |
| TR133112|c0_g1|m.3248 | Glycine max | Uncharacterized protein |  | 2484.3 |  | 60.016 | 26.301 | 14.796 | 60.416 |  | 0 | 0 | 0 | 0 | 0 | 0 | 0 | 0 |
| TR133113|c0_g1|m.55191 | Ricinus communis | Vesicle-associated membrane protein, putative | RCOM_0923570 | 1075.6 |  |  |  | 18.153 | 192.53 |  | 1 | 1 | 1 | 1 | 0 | 0 | 0 | 0 |
| TR133131|c0_g3|m.29612 | Lotus japonicus | Uncharacterized protein |  | 5052.2 | 90.18 |  | 73.086 | 69.582 |  | 183.86 | 0 | 0 | 0 | 0 | 1 | 0 | 0 | 1 |
| TR133123|c1_g2|m.18104 | Ricinus communis | Importin beta-1, putative | RCOM_0736490 | 2843.4 |  |  |  |  | 436.86 |  | 0 | 0 | 0 | 1 | 1 | 0 | 0 | 0 |
| TR133124|c0_g4|m.34247 | Medicago truncatula | DNA-damage-repair/toleration protein DRT102 | MTR_7g114750 | 135110 | 2613.8 | 2254.5 | 1245 | 1013.7 | 3702.9 | 2032.4 | 0 | 0 | -1 | 0 | 0 | -1 | 0 | 0 |
| TR133159|c0_g5|m.45306 | Arabidopsis lyrata | Predicted protein | ARALYDRAFT_683042 | 15896 | 212.87 | 194.18 |  |  | 952.13 | 1050.9 | 0 | 0 | -1 | 1 | 1 | 0 | 1 | 0 |
| TR133225|c0_g1|m.2177 | Ricinus communis | NMDA receptor-regulated protein, putative | RCOM_0894670 | 433.22 |  |  | 28.151 |  |  |  | 0 | 0 | 1 | 0 | -1 | 0 | 0 | 0 |
| TR133254|c0_g2|m.37999 | Populus trichocarpa | Predicted protein | POPTRDRAFT_657150 | 3005 |  | 67.211 | 24.687 |  | 105.09 | 105.24 | 0 | 0 | 0 | 1 | 1 | 0 | 1 | 1 |
| TR133265|c1_g4|m.13777 | Vitis vinifera | Putative uncharacterized protein | VIT_12s0028g01260 | 2465.9 |  | 56.597 |  |  | 172.34 | 229.18 | 0 | 0 | -1 | 0 | 1 | 0 | 0 | 0 |
| TR133272|c1_g1|m.2719 | Gossypium hirsutum | S-formylglutathione hydrolase |  | 144790 | 901.57 | 1175.2 | 649.58 | 746.49 | 7310.5 | 8959.7 | 0 | 0 | 0 | 1 | 1 | 0 | 1 | 1 |
| TR49529|c0_g2|m.3291 | Glycine max | Uncharacterized protein | Gma.55773 | 10258 |  | 129.04 |  |  | 630.54 | 554.98 | 0 | 0 | -1 | 0 | 1 | 0 | 0 | 0 |
| TR133290|c0_g9|m.28091 | Silene latifolia | UDP-glucuronic acid decarboxylase (Fragment) |  | 60786 | 363.22 | 481.25 | 283.75 | 256.22 | 2260 | 1970.1 | 0 | 0 | 0 | 1 | 1 | 0 | 1 | 1 |
| TR133296|c1_g8|m.35778 | Vitis vinifera | Putative uncharacterized protein | VIT_01s0011g01990 | 170.21 |  |  | 24.346 |  |  |  | 0 | 0 | 1 | 0 | -1 | 0 | 0 | 0 |
| TR133303|c3_g1|m.41070 | Medicago truncatula | Adenylate kinase 1 | adk1 | 901.9 |  | 14.924 | 15.039 | 10.002 |  |  | 0 | -1 | 0 | -1 | -1 | 0 | 0 | 0 |
| TR150436|c0_g6|m.26417 | Ricinus communis | Acireductone dioxygenase, putative | RCOM_0911070 | 7373.9 | 82.135 |  | 26.84 | 19.634 | 200.31 | 218.36 | 0 | 0 | 0 | 0 | 1 | 0 | 0 | 1 |
| TR133321|c0_g1|m.42090 | Ricinus communis | ATP-citrate synthase, putative | RCOM_1436330 | 11418 | 109.08 | 230.3 | 228.18 | 222.81 |  | 598.31 | 1 | 1 | 0 | 0 | 1 | 0 | 0 | 1 |
| TR86512|c1_g12|m.50506 | Silene latifolia | SEPALLATA1 homologous protein | SlSEP1 | 159.28 |  |  |  |  |  |  | 0 | 0 | 0 | 0 | 0 | 0 | 0 | 0 |
| TR133528|c0_g3|m.54201 | Medicago truncatula | Polygalacturonase inhibitor protein | MTR_7g023740 | 817.56 |  | 22.164 |  | 20.671 | 81.903 |  | 0 | 0 | 0 | 0 | 0 | 0 | 0 | 0 |
| TR133539|c0_g2|m.10081 | Ricinus communis | Putative uncharacterized protein | RCOM_0293460 | 1254.4 |  | 48.382 |  |  | 150.43 |  | 0 | 0 | -1 | 0 | 1 | 0 | 0 | 0 |
| TR133566|c1_g2|m.15802 | Silene latifolia | Putative polygalacturonase (Fragment) |  | 455.5 |  |  |  |  |  |  | 0 | 0 | 0 | 0 | 0 | 0 | 0 | 0 |
| TR133578|c0_g1|m.45727 | Vitis vinifera | Putative uncharacterized protein | VIT_13s0064g01390 | 54409 | 621.92 | 893.41 | 419.73 | 267.78 | 1202.2 | 1456.5 | 0 | 0 | 0 | 0 | 1 | 0 | 0 | 1 |
| TR146209|c0_g1|m.20047 | Vitis vinifera | Putative uncharacterized protein | VIT_01s0026g02640 | 1165.4 |  |  |  | 21.375 |  |  | 0 | 0 | 1 | 0 | -1 | 0 | 0 | 0 |
| TR56116|c0_g1|m.54831 | Silene latifolia | Adenine nucleotide alpha hydrolases-like protein (Fragment) |  | 26984 | 126.84 | 223.34 | 166.39 | 331.71 | 706.69 | 402.44 | 1 | 1 | 0 | 0 | 0 | 0 | 0 | 0 |
| TR133617|c1_g21|m.51258 |  |  |  | 1894.7 | 150.31 |  | 95.605 | 57.816 |  |  | 0 | -1 | 0 | -1 | -1 | 0 | 0 | 0 |
| TR9072|c0_g1|m.16842 | Ricinus communis | Ferritin | RCOM_0847660 | 47741 | 353.62 | 723.49 |  | 101.31 | 1870.6 | 2967 | 0 | 0 | 0 | 0 | 0 | 0 | 0 | 0 |
| TR133650|c0_g1|m.28558 | Ricinus communis | ATP-citrate synthase, putative | RCOM_1436330 | 137.87 |  |  | 30.175 | 24.701 |  |  | 0 | 0 | 1 | 0 | -1 | 0 | 0 | 0 |
| TR133657|c1_g1|m.59055 | Spinacia oleracea | 6-phosphogluconate dehydrogenase, decarboxylating | pgdC | 28894 | 342.15 | 429.56 | 363.87 | 369.44 | 654.79 | 342.47 | 0 | 0 | 0 | 0 | 0 | 0 | 0 | 0 |
| TR133662|c0_g8|m.42332 | Vitis vinifera | Putative uncharacterized protein | VIT_07s0005g00250 | 123370 | 2231.7 | 1933.3 | 767.42 | 755.9 | 4103.8 | 3837.4 | 0 | 0 | -1 | 1 | 1 | -1 | 1 | 1 |
| TR133664|c0_g3|m.12874 | Vitis vinifera | Proteasome subunit alpha type | VIT_18s0001g12760 | 77624 | 797.15 | 519.93 | 805.31 | 827.36 | 2836.3 | 2361.2 | 1 | 1 | 0 | 1 | 1 | 0 | 1 | 1 |
| TR133664|c0_g6|m.46213 | Vitis vinifera | Proteasome subunit alpha type | VITISV_014475 | 27179 | 273.45 | 214.54 | 264.98 | 259.9 | 662.74 | 190.25 | 1 | 1 | 0 | 0 | 0 | 0 | 0 | 0 |
| TR133667|c1_g11|m.51877 | Glycine max | Uncharacterized protein | Gma.50629 | 124240 | 693.46 | 990.46 | 51.969 | 407.2 | 2421.7 | 2629.2 | 0 | 0 | 0 | 1 | 1 | 0 | 1 | 1 |
| TR148221|c1_g7|m.39679 | Populus trichocarpa | Predicted protein (Fragment) | POPTRDRAFT_294146 | 68606 | 147.51 |  | 211.05 | 194.49 | 514.67 | 367.69 | 1 | 1 | 0 | 0 | 0 | 0 | 0 | 0 |
| TR133675|c0_g6|m.24420 | Ricinus communis | Groes chaperonin, putative | RCOM_0710470 | 789.71 |  |  |  |  |  |  | 0 | 0 | 0 | 0 | 0 | 0 | 0 | 0 |
| TR133675|c0_g8|m.53431 | Vitis vinifera | Putative uncharacterized protein | VIT_17s0000g03620 | 103900 | 1908.4 | 2268.9 | 922.28 | 734.94 | 889.85 | 1784.7 | 0 | 0 | -1 | 0 | 0 | -1 | 0 | 0 |
| TR133678|c2_g3|m.50478 | Rumex obtusifolius | Putative glycine rich protein | grp | 118350 | 964.12 | 998.04 | 255.03 | 364.48 | 4774.2 | 3768.1 | 0 | 0 | -1 | 1 | 1 | -1 | 1 | 1 |
| TR133679|c0_g2|m.58870 | Glycine max | Uncharacterized protein | Gma.1651 | 1888.6 |  |  | 93.833 | 34.371 |  |  | 0 | 0 | 1 | 0 | -1 | 0 | 0 | 0 |
| TR133685|c0_g1|m.25878 | Vitis vinifera | Putative uncharacterized protein | VIT_10s0003g03510 | 4024.9 |  | 50.501 | 27.179 | 19.904 |  | 218.09 | 0 | 0 | 0 | 0 | 1 | 0 | 0 | 1 |
| TR133694|c1_g10|m.22350 | Jatropha curcas | Auxin-repressed protein-like protein ARP1 |  | 1023.4 |  |  |  | 100.51 |  |  | 0 | 0 | 1 | 0 | -1 | 0 | 0 | 0 |
| TR133702|c1_g2|m.47381 | Vitis vinifera | Putative uncharacterized protein | VIT_03s0038g04470 | 39743 | 72.62 | 47.125 | 5.6671 |  | 1366.8 | 692.44 | 0 | 0 | 0 | 0 | 0 | 0 | 0 | 0 |
| TR133703|c5_g16|m.9512 | Ricinus communis | Major latex protein, putative | RCOM_1115210 | 1146600 | 2870.6 | 2033.4 | 9638.9 | 8167.3 | 51668 | 46405 | 1 | 1 | 1 | 1 | 1 | 1 | 1 | 1 |
| TR37911|c0_g1|m.36901 | Glycine max | Uncharacterized protein | Gma.43879 | 2631.1 |  | 83.631 | 94.782 | 46.152 |  | 66.365 | 0 | 0 | 0 | 0 | 0 | 0 | 0 | 0 |
| TR58690|c0_g11|m.48927 | Vitis vinifera | Putative uncharacterized protein | VIT_12s0028g03180 | 3261 |  | 128.17 |  |  |  | 122.65 | 0 | 0 | -1 | 0 | 1 | 0 | 0 | 0 |
| TR160427|c1_g6|m.42883 | Glycine max | Uncharacterized protein |  | 5519.1 | 116.28 | 189.12 |  |  | 139.89 | 109.97 | 0 | 0 | -1 | 0 | 1 | 0 | 0 | 0 |
| TR134493|c0_g3|m.10978 | Ricinus communis | Xylose isomerase | RCOM_0077940 | 28890 | 179.45 | 229.57 | 258.07 | 167.06 | 551.31 | 679.59 | 1 | 1 | 0 | 1 | 1 | 0 | 1 | 1 |
| TR135002|c0_g3|m.45510 | Vitis vinifera | Putative uncharacterized protein | VIT_04s0023g01650 | 80399 | 279.24 | 264.27 | 596.38 | 558.21 | 2442.1 | 2479.3 | 1 | 1 | 1 | 1 | 1 | 1 | 1 | 1 |
| TR134502|c0_g1|m.55742 | Ricinus communis | Putative uncharacterized protein | RCOM_0985500 | 3374.8 | 53.88 | 22.91 | 29.924 | 30.505 | 19.214 | 37.252 | 0 | -1 | 0 | 0 | 0 | 0 | 0 | 0 |
| TR134506|c0_g1|m.13826 | Ricinus communis | Potassium transporter, putative | RCOM_1444030 | 3392.9 | 103.67 | 92.693 | 34.893 | 48.822 |  |  | 0 | -1 | -1 | -1 | -1 | -1 | 0 | 0 |
| TR98897|c1_g1|m.21837 | Populus trichocarpa | Protein translocase subunit SecA 2 | secA2 | 2301.5 | 47.136 | 42.078 | 26.618 | 0.65692 |  | 55.907 | 0 | 0 | 0 | 0 | 0 | 0 | 0 | 0 |
| TR134520|c0_g2|m.29982 | Ricinus communis | Proline synthetase associated protein, putative | RCOM_0903650 | 1253.7 |  |  |  |  |  |  | 0 | 0 | 0 | 0 | 0 | 0 | 0 | 0 |
| TR134939|c0_g20|m.46697 | Hevea brasiliensis | Fructose-bisphosphate aldolase |  | 391060 | 6276.8 | 7177.5 | 3074.8 | 2240.3 | 7344.3 | 6594.4 | 0 | 0 | -1 | 0 | 1 | -1 | 0 | 1 |
| TR134942|c0_g2|m.20773 | Vitis vinifera | Putative uncharacterized protein | VIT_08s0007g00840 | 197830 | 1044.9 | 1499.2 | 780.61 | 469.32 | 6706.3 | 7532.4 | 0 | 0 | 0 | 1 | 1 | 0 | 1 | 1 |
| TR134947|c0_g11|m.50401 | Ricinus communis | Hsp90 co-chaperone AHA1, putative | RCOM_0278300 | 1326.6 |  |  | 25.583 |  | 71.09 |  | 1 | 1 | 1 | 1 | 0 | 0 | 0 | 0 |
| TR81680|c0_g8|m.43358 | Ricinus communis | Hsp90 co-chaperone AHA1, putative | RCOM_0278300 | 13327 | 532.12 | 113.23 | 137.9 | 385.89 | 151.14 |  | 0 | -1 | 0 | 0 | 0 | 0 | 0 | 0 |
| TR134956|c0_g1|m.56724 | Medicago truncatula | Alpha-L-arabinofuranosidase | Araf1 | 236950 | 3169.7 | 3429.9 | 4414.7 | 3825.2 | 3549.9 | 2119.3 | 0 | 0 | 0 | 0 | 0 | 0 | 0 | 0 |
| TR134959|c1_g1|m.25694 | Vitis vinifera | Putative uncharacterized protein | VIT_18s0001g10170 | 1729.1 | 54.214 | 29.065 | 10.484 |  |  |  | 0 | -1 | 0 | -1 | -1 | 0 | 0 | 0 |
| TR134977|c0_g4|m.11907 | Vitis vinifera | Putative uncharacterized protein | VIT_13s0047g00170 | 905.17 | 18.451 |  |  |  | 87.416 | 80.098 | 0 | 0 | -1 | 0 | 1 | 0 | 0 | 0 |
| TR134978|c0_g1|m.45499 | Vitis vinifera | Putative uncharacterized protein | VIT_14s0006g03200 | 9805.3 | 47.306 | 58.661 | 114.63 | 132.46 | 275.87 | 150.05 | 1 | 1 | 1 | 0 | 0 | 1 | 0 | 0 |
| TR134984|c0_g5|m.28562 | Populus trichocarpa | Predicted protein | POPTRDRAFT_1117139 | 2470.4 | 9.9273 |  | 76.738 | 49.713 |  |  | 0 | 0 | 0 | -1 | -1 | 0 | 0 | 0 |
| TR134985|c4_g2|m.17040 | Gossypium hirsutum | Trans-2-enoyl-CoA reductase | ECR2 | 4248.7 | 189.02 | 178.78 |  |  |  |  | 0 | 0 | -1 | -1 | 0 | 0 | 0 | 0 |
| TR134992|c0_g7|m.39485 | Ricinus communis | Putative uncharacterized protein | RCOM_1500350 | 2676.5 | 66.131 |  |  | 17.247 |  | 254.26 | 0 | 0 | 0 | 0 | 0 | 0 | 0 | 0 |
| TR134998|c0_g1|m.6739 | Camellia sinensis | Lipoxygenase |  | 414860 | 4766.6 | 5955.7 | 10419 | 8564 | 6948.4 | 6717.1 | 0 | 0 | 0 | 0 | 0 | 0 | 0 | 0 |
| TR152759|c0_g1|m.61348 | Vitis vinifera | Putative uncharacterized protein | VIT_15s0046g00300 | 2609.3 | 39.599 | 37.041 | 22.203 |  | 11.404 | 126.88 | 0 | 0 | 0 | 0 | 0 | 0 | 0 | 0 |
| TR135015|c0_g1|m.3281 | Glycine max | Glucose-1-phosphate adenylyltransferase | Gma.31439 | 78219 | 1180.6 | 1166.2 | 315.48 | 722.54 |  | 2349.9 | 0 | 0 | 0 | 1 | 0 | 0 | 1 | 0 |
| TR135015|c0_g6|m.57864 | Populus trichocarpa | Glucose-1-phosphate adenylyltransferase | POPTRDRAFT_721986 | 3942.4 | 130.5 | 107.76 | 81.29 | 69.861 | 79.521 | 115.61 | 0 | 0 | 0 | 0 | 0 | 0 | 0 | 0 |
| TR135016|c0_g2|m.1617 | Vitis vinifera | Putative uncharacterized protein | VITISV_001511 | 2955.4 |  |  |  |  | 226.25 |  | 0 | 0 | 0 | 1 | 1 | 0 | 0 | 0 |
| TR135018|c0_g18|m.45474 | Citrus unshiu | Vacuolar H+-ATPase A subunit (Fragment) | Cit-VATP A-1 | 130050 | 2010 | 2351.6 | 874.06 |  | 4780.4 | 3530.4 | 0 | 0 | 0 | 0 | 0 | 0 | 0 | 0 |
| TR135018|c0_g6|m.52368 | Gossypium hirsutum | Vacuolar H+-ATPase catalytic subunit |  | 1011900 | 14142 | 15781 | 8434.7 | 7233.7 | 23418 | 22560 | 0 | 0 | -1 | 1 | 1 | -1 | 1 | 1 |
| TR135029|c3_g5|m.30751 | Vitis vinifera | Putative uncharacterized protein | VIT_05s0029g00420 | 224.02 |  |  | 22.637 | 19.769 |  |  | 0 | 0 | 1 | 0 | -1 | 0 | 0 | 0 |
| TR135030|c0_g1|m.10803 | Vitis vinifera | Glutathione reductase (NADPH) (Fragment) | GOR | 31904 | 629.68 | 485.2 | 324.36 | 303.26 | 822.79 | 754.68 | 0 | 0 | 0 | 0 | 1 | 0 | 0 | 1 |
| TR135035|c0_g1|m.43458 | Glycine max | Uncharacterized protein | Gma.25750 | 5844 |  |  | 60.647 |  | 265.7 | 190.62 | 1 | 1 | 1 | 1 | 0 | 0 | 0 | 0 |
| TR95062|c0_g1|m.57867 | Vitis vinifera | Putative uncharacterized protein | VIT_00s0880g00020 | 11003 | 97.713 | 113.73 | 125.29 | 119.11 | 51.828 | 60.146 | 0 | 0 | 0 | -1 | -1 | 0 | -1 | -1 |
| TR27350|c0_g2|m.52040 | Ricinus communis | Protein yrdA, putative | RCOM_1505640 | 7834.2 |  |  | 32.998 | 60.435 | 180.32 |  | 1 | 1 | 1 | 1 | 0 | 0 | 0 | 0 |
| TR135118|c0_g1|m.16199 | Ricinus communis | Dihydrolipoyllysine-residue acetyltransferase component of pyruvate dehydrogenase, putative | RCOM_0352880 | 2683.9 | 4.7158 | 6.8117 | 68.142 | 7.712 | 107.36 | 186.21 | 1 | 1 | 0 | 0 | 0 | 0 | 0 | 0 |
| TR135119|c1_g1|m.774 | Gossypium hirsutum | 3-ketoacyl-CoA reductase 1 |  | 2663.6 | 57.625 |  | 34.366 | 8.6081 | 31.903 | 39.764 | 0 | 0 | 0 | 0 | 0 | 0 | 0 | 0 |
| TR135121|c0_g1|m.62137 | Arabidopsis lyrata | Phosphoserine aminotransferase | ARALYDRAFT_491084 | 38842 | 423.75 | 264.56 | 315.84 | 293.47 | 901.94 | 1089.4 | 0 | 0 | 0 | 1 | 1 | 0 | 1 | 1 |
| TR65719|c1_g9|m.15953 | Copaifera officinalis | Glutathione peroxidase |  | 33520 |  |  | 9.1001 | 41.582 | 1131.9 | 1391.1 | 1 | 1 | 1 | 1 | 1 | 0 | 0 | 1 |
| TR135124|c0_g2|m.12708 | Glycine max | Uncharacterized protein |  | 11743 |  |  |  |  | 2718.6 |  | 0 | 0 | 0 | 1 | 1 | 0 | 0 | 0 |
| TR135147|c0_g2|m.3245 | Populus trichocarpa | Predicted protein | POPTRDRAFT_834110 | 476.54 |  |  |  |  |  |  | 0 | 0 | 0 | 0 | 0 | 0 | 0 | 0 |
| TR135152|c0_g1|m.18564 | Ricinus communis | ATP binding protein, putative | RCOM_0658800 | 2132.9 |  |  |  |  |  | 144.01 | 0 | 0 | 0 | 1 | 1 | 0 | 0 | 0 |
| TR135152|c0_g2|m.17455 | Ricinus communis | ATP binding protein, putative | RCOM_0658800 | 15148 |  | 115.36 | 92.246 | 297.5 | 426.67 |  | 1 | 1 | 0 | 0 | 0 | 0 | 0 | 0 |
| TR135158|c1_g1|m.14089 | Ricinus communis | D-3-phosphoglycerate dehydrogenase, putative | RCOM_0811570 | 185.18 |  |  | 12.378 |  |  |  | 0 | 0 | 1 | 0 | -1 | 0 | 0 | 0 |
| TR135165|c0_g1|m.17977 | Vitis vinifera | Putative uncharacterized protein | VITISV_014078 | 1075.1 |  |  |  |  |  | 72.213 | 0 | 0 | 0 | 1 | 1 | 0 | 0 | 0 |
| TR150115|c0_g3|m.4921 | Glycine max | Uncharacterized protein | Gma.2191 | 426.59 |  |  |  |  |  |  | 0 | 0 | 0 | 0 | 0 | 0 | 0 | 0 |
| TR62400|c0_g1|m.5012 | Helianthus annuus | Beta-hydroxyacyl-ACP dehydratase | HAAD1 | 52913 | 907.99 | 1107.3 | 395.17 | 157.52 | 640.88 | 536.54 | 0 | 0 | -1 | 0 | 0 | -1 | 0 | 0 |
| TR17787|c0_g1|m.52235 | Malus domestica | WHY domain class transcription factor | WHY2 | 145.69 |  |  |  |  |  | 145.69 | 0 | 0 | 0 | 1 | 1 | 0 | 0 | 0 |
| TR135196|c0_g6|m.13820 | Vitis vinifera | Putative uncharacterized protein | VIT_02s0012g02660 | 5082.7 |  |  | 29.981 | 7.0865 | 221.56 | 217.92 | 1 | 1 | 1 | 1 | 1 | 0 | 0 | 1 |
| TR135201|c0_g1|m.19935 | Hevea brasiliensis | Allene oxide synthase | aos | 24759 | 105.1 | 317.14 | 591.81 | 336.29 | 40.944 | 150.34 | 0 | 0 | 0 | 0 | 0 | 0 | 0 | 0 |
| TR31146|c0_g1|m.32351 | Populus trichocarpa | Predicted protein | POPTRDRAFT_555144 | 1041.1 |  | 10.243 | 44.213 | 34.498 |  |  | 0 | 0 | 0 | -1 | -1 | 0 | 0 | 0 |
| TR158600|c0_g1|m.4950 | Opuntia virus X | Coat protein |  | 7577.4 | 159.35 | 131.39 |  |  | 207.3 |  | 0 | 0 | -1 | 0 | 1 | 0 | 0 | 0 |
| TR135292|c0_g12|m.12766 | Glycine max | Uncharacterized protein |  | 27501 | 533.86 | 495.25 | 676.55 | 543.73 | 273.26 | 242.46 | 0 | 0 | 0 | -1 | -1 | 0 | -1 | -1 |
| TR135295|c0_g1|m.50574 | Silene latifolia | Phosphoglycerate kinase (Fragment) |  | 988300 | 11575 | 12952 | 7304.3 | 6442.1 | 30205 | 28583 | 0 | 0 | -1 | 1 | 1 | -1 | 1 | 1 |
| TR135300|c2_g9|m.58110 | Ricinus communis | Arginase, putative | RCOM_1611220 | 17553 | 70.137 | 148.94 | 10.287 | 13.927 | 437.6 | 459.66 | 0 | 0 | 0 | 1 | 1 | 0 | 1 | 1 |
| TR135301|c0_g2|m.48231 | Gossypium hirsutum | Glycolate oxidase | GOX | 120180 | 601.84 | 1079.8 | 341.64 | 367.11 | 4087.6 | 3784.7 | 0 | 0 | 0 | 1 | 1 | 0 | 1 | 1 |
| TR135303|c0_g1|m.45989 | Vitis vinifera | Putative uncharacterized protein | VIT_17s0000g09870 | 22529 | 281.18 | 216.07 | 258.78 | 271.06 | 246.31 | 365.16 | 1 | 1 | 0 | 0 | 0 | 0 | 0 | 0 |
| TR151900|c1_g1|m.57488 | Populus trichocarpa | Malic enzyme | POPTRDRAFT_591812 | 141240 | 1842.1 | 1986.8 | 2318.8 | 1132.2 | 3655.5 | 3793 | 0 | 0 | 0 | 1 | 0 | 0 | 1 | 0 |
| TR135311|c0_g4|m.37052 | Ricinus communis | Malic enzyme | RCOM_0658870 | 38125 | 522.69 | 435.67 | 484.78 | 443.81 | 1232.2 |  | 0 | 0 | 0 | 0 | 1 | 0 | 0 | 1 |
| TR135343|c0_g1|m.62903 | Vitis vinifera | 3-phosphoshikimate 1-carboxyvinyltransferase | VIT_15s0048g00350 | 2136.1 |  |  |  |  |  |  | 0 | 0 | 0 | 0 | 0 | 0 | 0 | 0 |
| TR135352|c0_g1|m.20408 | Populus trichocarpa | Thioredoxin reductase | POPTRDRAFT_1080427 | 6898 |  | 22.75 |  | 18.633 | 62.112 | 88.759 | 0 | 0 | 0 | 0 | 0 | 0 | 0 | 0 |
| TR135375|c0_g4|m.13266 | Vitis vinifera | Acyl-coenzyme A oxidase | VITISV_000871 | 7286.6 | 83.156 |  | 33.84 | 95.624 | 51.981 | 203.43 | 0 | 0 | 0 | 0 | 0 | 0 | 0 | 0 |
| TR135378|c0_g10|m.23677 | Ricinus communis | Isocitrate dehydrogenase, putative | RCOM_0519460 | 100760 | 505.29 | 597.94 | 259.29 | 1758.8 | 2578.2 | 2584.1 | 1 | 1 | 0 | 1 | 0 | 0 | 1 | 0 |
| TR135382|c1_g1|m.19377 | Silene latifolia | Alanine-2-oxoglutarate aminotransferase (Fragment) |  | 11091 | 134.41 | 41.429 | 99.565 | 12.602 | 365.5 | 382.46 | 0 | 0 | 0 | 1 | 1 | 0 | 1 | 1 |
| TR135387|c0_g1|m.41187 | Solanum lycopersicum | Malate dehydrogenase | mdh | 8259.1 | 215.75 | 306.46 | 89.675 | 115.37 | 693.47 | 675.67 | 0 | 0 | 0 | 1 | 1 | 0 | 1 | 1 |
| TR135396|c0_g3|m.44200 | Vitis vinifera | Putative uncharacterized protein | VIT_14s0171g00330 | 51483 | 835.68 | 996.58 | 497.03 | 488.77 | 1114.4 | 584.92 | 0 | 0 | -1 | 0 | 0 | -1 | 0 | 0 |
| TR135398|c0_g1|m.18925 | Vitis vinifera | Putative uncharacterized protein | VIT_09s0002g03930 | 65209 | 582.33 | 560.67 | 356.78 | 304.97 | 1468.5 | 1155.4 | 0 | 0 | -1 | 1 | 1 | -1 | 1 | 1 |
| TR135419|c0_g8|m.22754 | Arabidopsis lyrata | Putative uncharacterized protein | ARALYDRAFT_481315 | 20510 | 508.63 |  | 167.19 | 205.21 |  |  | 0 | -1 | 0 | -1 | -1 | 0 | 0 | 0 |
| TR135459|c0_g1|m.40296 | Gossypium armourianum | Beta-mannosidase |  | 1007 |  |  |  |  |  |  | 0 | 0 | 0 | 0 | 0 | 0 | 0 | 0 |
| TR135465|c4_g5|m.6767 | Mesembryanthemum crystallinum | RNA-binding protein (Precursor) |  | 213000 | 3188.8 | 3827.7 | 1006.2 | 811.88 | 4068.3 | 4096.5 | 0 | 0 | -1 | 0 | 1 | -1 | 0 | 1 |
| TR135468|c2_g1|m.11991 | Vitis vinifera | Putative uncharacterized protein | VIT_13s0047g00200 | 126.51 |  |  |  |  |  |  | 0 | 0 | 0 | 0 | 0 | 0 | 0 | 0 |
| TR135474|c0_g1|m.15807 | Vitis vinifera | Putative uncharacterized protein | VIT_02s0033g00930 | 222.65 |  |  |  |  |  |  | 0 | 0 | 0 | 0 | 0 | 0 | 0 | 0 |
| TR71684|c0_g1|m.24033 | Ricinus communis | 1-deoxy-D-xylulose 5-phosphate reductoisomerase, chloroplast, putative | RCOM_1510580 | 16816 | 84.295 | 97.376 |  |  | 440.6 | 413.93 | 0 | 0 | -1 | 1 | 1 | 0 | 1 | 0 |
| TR84748|c0_g3|m.56984 | Vitis vinifera | Putative uncharacterized protein | VITISV_002886 | 1366 |  |  | 29.048 |  | 47.504 |  | 1 | 1 | 1 | 1 | 0 | 0 | 0 | 0 |
| TR135907|c1_g3|m.19985 | Vitis vinifera | Putative uncharacterized protein | VIT_05s0077g00280 | 1260 |  |  | 34.573 | 17.09 |  |  | 0 | 0 | 1 | 0 | -1 | 0 | 0 | 0 |
| TR72194|c2_g3|m.29452 | Ricinus communis | Putative uncharacterized protein | RCOM_1435150 | 10628 | 77.847 | 588.34 | 45.363 | 174.17 |  |  | 0 | -1 | 0 | -1 | -1 | 0 | 0 | 0 |
| TR98555|c0_g2|m.15423 | Vitis vinifera | Putative uncharacterized protein | VIT_05s0051g00830 | 2792 | 53.363 | 41.086 | 49.548 | 42.96 |  | 63.73 | 0 | 0 | 0 | 0 | 0 | 0 | 0 | 0 |
| TR135921|c0_g4|m.57784 | Vitis vinifera | Malic enzyme | VIT_11s0016g03210 | 5436.1 | 40.054 | 109.68 | 77.738 | 58.837 |  |  | 0 | 0 | 0 | -1 | -1 | 0 | 0 | 0 |
| TR135921|c0_g5|m.19393 | Ricinus communis | Malic enzyme | RCOM_1049930 | 138910 | 1668.9 | 2405.8 | 1241.8 | 1226.1 | 5441.4 | 5293.2 | 0 | 0 | 0 | 1 | 1 | 0 | 1 | 1 |
| TR99923|c0_g7|m.57013 | Vitis vinifera | Malic enzyme | VIT_11s0016g03210 | 11921 | 491.95 | 499.27 | 759.26 | 609.67 | 316.02 |  | 0 | 0 | 0 | -1 | 0 | 0 | -1 | 0 |
| TR135944|c0_g1|m.39212 | Ricinus communis | Chloroplast alpha-glucan water dikinase, putative | RCOM_1305250 | 36623 | 284.45 | 583.89 | 173.85 | 180.13 | 1048.8 | 682.06 | 0 | 0 | 0 | 0 | 0 | 0 | 0 | 0 |
| TR135944|c0_g1|m.39213 | Ricinus communis | Chloroplast alpha-glucan water dikinase, putative | RCOM_1305250 | 75976 | 908.71 | 1134 | 489.93 | 629.49 | 1716.6 | 1281.4 | 0 | 0 | 0 | 0 | 0 | 0 | 0 | 0 |
| TR164532|c0_g11|m.8702 | Populus trichocarpa | Predicted protein | POPTRDRAFT_554465 | 329.78 |  | 69.8 |  |  |  |  | 0 | 0 | -1 | -1 | 0 | 0 | 0 | 0 |
| TR135955|c0_g5|m.18844 | Vitis vinifera | Putative uncharacterized protein | VIT_18s0122g00510 | 217150 | 1382.2 | 1129.2 | 1705.1 | 1228.8 | 9290.1 | 9441.7 | 1 | 1 | 0 | 1 | 1 | 0 | 1 | 1 |
| TR135955|c0_g6|m.56449 | Vitis vinifera | Putative uncharacterized protein | VIT_18s0122g00510 | 42285 | 313.88 | 354.62 | 170.98 | 173.83 | 1596.2 | 1297.3 | 0 | 0 | -1 | 1 | 1 | -1 | 1 | 1 |
| TR135964|c1_g13|m.26267 | Vitis vinifera | Putative uncharacterized protein | VIT_02s0025g02170 | 7321.4 | 97.046 | 265.5 | 149.38 | 83.78 | 167.67 | 94.468 | 0 | 0 | 0 | 0 | 0 | 0 | 0 | 0 |
| TR135973|c1_g10|m.35323 | Glycine max | Uncharacterized protein |  | 82762 | 1012 | 1198.5 | 787.6 | 286.77 | 2107.9 | 1465.6 | 0 | 0 | 0 | 0 | 0 | 0 | 0 | 0 |
| TR135973|c1_g2|m.49151 | Vitis vinifera | Putative uncharacterized protein | VIT_09s0002g07880 | 212580 | 2731.9 | 2693.9 | 3225.5 | 2874.2 | 4315.7 | 4896.9 | 1 | 1 | 0 | 1 | 1 | 0 | 1 | 1 |
| TR135973|c1_g4|m.37780 | Glycine max | Uncharacterized protein | Gma.5427 | 1758.6 |  | 19.062 | 79.182 | 16.129 |  |  | 0 | 0 | 0 | -1 | -1 | 0 | 0 | 0 |
| TR135973|c1_g6|m.23582 | Glycine max | Uncharacterized protein |  | 78992 |  | 1104.5 | 806.05 | 506.44 | 755.89 | 2007.9 | 0 | 0 | 0 | 0 | 0 | 0 | 0 | 0 |
| TR135983|c1_g1|m.42412 | Vitis vinifera | Putative uncharacterized protein | VIT_03s0038g03730 | 1410.3 | 17.234 | 12.337 | 20.19 | 3.854 |  | 30.971 | 0 | 0 | 0 | 0 | 0 | 0 | 0 | 0 |
| TR89463|c0_g1|m.23353 | Populus trichocarpa | Predicted protein | POPTRDRAFT_552034 | 405980 | 2950.1 | 3306 | 3886.3 | 2356.9 | 10655 | 10463 | 0 | 0 | 0 | 1 | 1 | 0 | 1 | 1 |
| TR145071|c2_g2|m.34397 | Didierea madagascariensis | Photosystem I p700 apoprotein A1 (Fragment) | psaA | 82326 | 1342.8 | 1551.6 | 1797.8 | 1449.1 | 1344.3 | 1331.2 | 0 | 0 | 0 | 0 | 0 | 0 | 0 | 0 |
| TR145071|c2_g2|m.34398 | Weingartia kargliana | Photosystem I p700 chlorophyll A apoprotein A2 (Fragment) | psaB | 88324 | 1286.8 | 1704.5 | 2480.3 | 1782.3 | 1181.5 | 1484.9 | 0 | 0 | 0 | 0 | 0 | 0 | 0 | 0 |
| TR72578|c0_g1|m.3271 | Maihuenia poeppigii | Photosystem II CP43 chlorophyll apoprotein (Fragment) | psbC | 888960 | 9641 | 10605 | 11034 | 10034 | 21402 | 34849 | 1 | 1 | 0 | 0 | 0 | 0 | 0 | 0 |
| TR72578|c0_g1|m.3272 | Weingartia kargliana | Photosystem II D2 protein (Fragment) | psbD | 375540 | 4775.2 | 5029.6 | 7879.3 | 6680.7 | 7571.6 | 4291.3 | 0 | 0 | 0 | 0 | 0 | 0 | 0 | 0 |
| TR13638|c0_g1|m.28151 | Ricinus communis | Protein CREG1, putative | RCOM_0852680 | 3176 |  |  |  |  |  |  | 0 | 0 | 0 | 0 | 0 | 0 | 0 | 0 |
| TR13639|c0_g2|m.19827 | Vitis vinifera | Putative uncharacterized protein | VIT_01s0011g01800 | 2341 |  | 45.94 | 67.269 | 79.676 | 67.776 | 44.283 | 0 | 0 | 0 | 0 | 0 | 0 | 0 | 0 |
| TR136516|c2_g1|m.61148 | Citrus sinensis | Short chain alcohol dehydrogenase | ABA2 | 588.69 |  |  |  |  |  |  | 0 | 0 | 0 | 0 | 0 | 0 | 0 | 0 |
| TR41853|c0_g1|m.58308 | Ricinus communis | Nucleotide-binding protein, putative | RCOM_1679530 | 740.4 |  |  |  |  | 95.151 |  | 0 | 0 | 0 | 1 | 1 | 0 | 0 | 0 |
| TR154591|c3_g1|m.8384 | Glycine max | Uncharacterized protein | Gma.31581 | 30026 | 261.33 | 288 | 211.27 | 174.71 | 545.16 | 786.8 | 0 | 0 | 0 | 0 | 0 | 0 | 0 | 0 |
| TR13653|c1_g1|m.2307 | Vitis vinifera | Putative uncharacterized protein | VIT_05s0029g00440 | 31169 | 666.19 | 789.54 | 229.53 |  | 364.22 | 472.18 | 0 | 0 | 0 | 0 | 0 | 0 | 0 | 0 |
| TR60024|c0_g1|m.48599 | Vitis vinifera | Putative uncharacterized protein | VIT_06s0004g04200 | 2137.9 |  |  |  |  |  |  | 0 | 0 | 0 | 0 | 0 | 0 | 0 | 0 |
| TR136544|c0_g1|m.26020 | Vitis vinifera | Putative uncharacterized protein | VIT_07s0005g04860 | 30066 | 461.51 | 761.71 | 284.77 | 230.09 | 499.64 |  | 0 | 0 | 0 | 0 | 0 | 0 | 0 | 0 |
| TR75556|c0_g1|m.52509 | Populus trichocarpa | Predicted protein (Fragment) | POPTRDRAFT_255709 | 301.15 | 34.644 | 41.489 |  |  |  |  | 0 | 0 | -1 | -1 | 0 | 0 | 0 | 0 |
| TR136586|c0_g1|m.20296 | Glycine max | Uncharacterized protein | Gma.58046 | 1992.3 |  |  |  |  |  |  | 0 | 0 | 0 | 0 | 0 | 0 | 0 | 0 |
| TR136588|c2_g4|m.25196 | Vitis vinifera | Putative uncharacterized protein | VIT_10s0042g00950 | 13893 | 64.628 | 240.64 |  | 105.58 | 382.32 | 85.308 | 0 | 0 | 0 | 0 | 0 | 0 | 0 | 0 |
| TR136606|c0_g3|m.57835 | Congregibacter litoralis KT71 | Secreted protein | KT71_05947 | 387.63 |  |  |  |  |  |  | 0 | 0 | 0 | 0 | 0 | 0 | 0 | 0 |
| TR136707|c1_g6|m.38287 | Dianthus caryophyllus | Glucosyltransferase | DcS6D11 | 5195.5 |  |  |  | 28.859 |  |  | 0 | 0 | 1 | 0 | -1 | 0 | 0 | 0 |
| TR136708|c0_g1|m.16634 | Vitis vinifera | Putative uncharacterized protein | VIT_09s0096g00090 | 1105.9 | 20.296 | 21.788 | 18.267 | 26.21 | 14.68 |  | 0 | 0 | 0 | 0 | 0 | 0 | 0 | 0 |
| TR13671|c0_g1|m.47092 | Medicago truncatula | Aldose 1-epimerase family protein expressed | MTR_6g069630 | 25073 | 441.33 | 195.23 | 304.65 | 414.62 | 1138.6 | 539.04 | 1 | 1 | 0 | 0 | 0 | 0 | 0 | 0 |
| TR136713|c0_g15|m.38357 | Vitis vinifera | Putative uncharacterized protein | VIT_17s0000g00920 | 212640 | 2620.2 | 3238.5 | 320.39 | 370.21 | 12920 | 13024 | 0 | 0 | -1 | 1 | 1 | -1 | 1 | 1 |
| TR156993|c0_g5|m.51756 | Physcomitrella patens | Predicted protein | PHYPADRAFT_172957 | 2074.3 |  |  | 137.91 | 91.943 |  |  | 0 | 0 | 1 | 0 | -1 | 0 | 0 | 0 |
| TR137199|c0_g1|m.5621 | Silene latifolia | Trigger factor type chaperone family protein (Fragment) |  | 1069.7 | 4.9666 | 9.1434 | 4.1994 |  |  |  | 0 | -1 | 0 | -1 | -1 | 0 | 0 | 0 |
| TR136750|c0_g1|m.14343 | Populus trichocarpa | Oligopeptide transporter OPT family | POPTRDRAFT_707057 | 38.981 |  |  |  |  |  |  | 0 | 0 | 0 | 0 | 0 | 0 | 0 | 0 |
| TR136763|c0_g11|m.39151 | Mesembryanthemum crystallinum | T-complex protein 1 epsilon subunit (Fragment) | TCP-1-EPSILON | 10094 | 28.827 | 33.217 | 104.63 | 62.619 | 449.95 | 403.57 | 1 | 1 | 0 | 1 | 1 | 0 | 1 | 1 |
| TR96273|c0_g5|m.56656 | Populus trichocarpa | Importin subunit alpha | POPTRDRAFT_828053 | 27835 | 210.62 | 302.67 | 285.19 | 217.08 | 443.39 | 813.53 | 0 | 0 | 0 | 0 | 0 | 0 | 0 | 0 |
| TR150823|c1_g7|m.24010 | Ricinus communis | Putative uncharacterized protein | RCOM_1177920 | 139.26 |  |  |  |  |  |  | 0 | 0 | 0 | 0 | 0 | 0 | 0 | 0 |
| TR13679|c0_g1|m.24736 | Ricinus communis | Importin beta-1, putative | RCOM_0736490 | 421.34 |  |  |  |  |  |  | 0 | 0 | 0 | 0 | 0 | 0 | 0 | 0 |
| TR13685|c0_g1|m.62286 | Vitis vinifera | Putative uncharacterized protein | VIT_00s0220g00130 | 24237 | 240.09 | 168.58 | 239.99 | 193.72 | 386.31 | 2088.2 | 1 | 1 | 0 | 0 | 0 | 0 | 0 | 0 |
| TR136945|c0_g7|m.29991 | Ricinus communis | ATP synthase gamma chain | RCOM_1107030 | 171320 | 1166.6 | 1534.1 | 798.88 | 470.94 | 6236.1 | 7172.3 | 0 | 0 | 0 | 1 | 1 | 0 | 1 | 1 |
| TR96398|c0_g1|m.21192 | Oryza brachyantha | Histone H4 | OB04G29840 | 693410 | 12383 | 15848 | 4531.4 | 10796 | 15720 | 16767 | 0 | 0 | 0 | 0 | 0 | 0 | 0 | 0 |
| TR136966|c0_g2|m.39979 | Vitis vinifera | Putative uncharacterized protein | VIT_19s0014g02210 | 520.95 |  |  | 167.32 |  | 15.026 |  | 0 | 0 | 1 | 1 | 0 | 0 | 0 | 0 |
| TR63512|c0_g1|m.36918 | Populus trichocarpa | Predicted protein | POPTRDRAFT_772086 | 1601.9 | 17.866 | 28.025 | 37.753 | 15.356 |  |  | 0 | 0 | 0 | -1 | -1 | 0 | 0 | 0 |
| TR162536|c0_g4|m.22673 | Vitis vinifera | Putative uncharacterized protein | VIT_03s0038g04490 | 10028 | 36.172 | 94.146 | 10.973 | 26.679 | 307.44 | 366.56 | 0 | 0 | 0 | 1 | 1 | 0 | 1 | 1 |
| TR137015|c34_g8|m.47569 | Schlumbergera virus X | Coat protein |  | 59429 | 2432 | 2703.9 | 99.177 |  |  |  | 0 | -1 | 0 | -1 | -1 | 0 | 0 | 0 |
| TR137031|c0_g2|m.664 | Spinacia oleracea | Voltage-dependent anion channel protein | SVDAC1 | 1231.2 | 27.592 | 40.956 |  |  |  |  | 0 | 0 | -1 | -1 | 0 | 0 | 0 | 0 |
| TR13707|c0_g1|m.61353 | Vitis vinifera | Putative uncharacterized protein | VIT_18s0001g15710 | 12836 | 124.89 | 282 | 72.241 |  | 377.56 | 399.12 | 0 | 0 | 0 | 0 | 1 | 0 | 0 | 1 |
| TR137136|c0_g2|m.19199 | Vitis vinifera | Putative uncharacterized protein | VIT_10s0003g00670 | 195.31 |  |  |  |  |  |  | 0 | 0 | 0 | 0 | 0 | 0 | 0 | 0 |
| TR137142|c0_g1|m.885 | Ricinus communis | Cytosolic purine 5-nucleotidase, putative | RCOM_1003850 | 1628.8 | 85.64 | 42.918 | 5.7789 |  | 323.75 | 112.11 | 0 | 0 | 0 | 0 | 0 | 0 | 0 | 0 |
| TR137142|c1_g5|m.50829 | Populus trichocarpa | Predicted protein | POPTRDRAFT_816192 | 45628 | 801.09 | 914.19 | 264.3 | 142.83 | 2240.4 | 792 | 0 | 0 | -1 | 0 | 0 | -1 | 0 | 0 |
| TR137144|c1_g3|m.26159 | Daucus carota | Nucellin-like protein | DcNLP | 29776 |  | 296.5 |  | 130.04 | 508.03 | 496.94 | 0 | 0 | 0 | 1 | 1 | 0 | 1 | 1 |
| TR137146|c0_g1|m.53057 | Vitis vinifera | Pectinesterase | VIT_16s0098g01900 | 4962.5 | 125.33 | 108.91 | 59.834 | 33.502 | 30.836 |  | 0 | -1 | -1 | 0 | 0 | -1 | 0 | 0 |
| TR137158|c0_g6|m.26537 | Vitis vinifera | Putative uncharacterized protein | VITISV_040233 | 284.62 |  |  |  |  |  |  | 0 | 0 | 0 | 0 | 0 | 0 | 0 | 0 |
| TR164510|c0_g1|m.5322 | Vitis vinifera | Putative uncharacterized protein | VIT_13s0019g04370 | 26033 | 568.02 | 386.44 | 268.69 | 239.52 | 640.81 | 444.83 | 0 | 0 | 0 | 0 | 0 | 0 | 0 | 0 |
| TR137172|c2_g1|m.30398 | Vitis vinifera | Putative uncharacterized protein | VIT_16s0050g00390 | 14572 | 311.91 | 129.9 | 80.51 | 53.667 | 713.71 | 767.82 | 0 | 0 | 0 | 1 | 1 | 0 | 1 | 1 |
| TR137174|c1_g4|m.16006 | Ricinus communis | Serine-pyruvate aminotransferase, putative | RCOM_0063050 | 20102 | 352.92 |  | 250.15 |  |  | 152.12 | 0 | -1 | 0 | 0 | 0 | 0 | 0 | 0 |
| TR137197|c0_g1|m.46356 | Populus trichocarpa | Predicted protein | POPTRDRAFT_814076 | 53194 | 623.82 | 541.09 |  | 147.03 | 2748.8 | 3084.2 | 0 | 0 | 0 | 1 | 0 | 0 | 1 | 0 |
| TR85642|c1_g5|m.2794 | Ricinus communis | 26S proteasome regulatory subunit rpn1, putative | RCOM_1172830 | 25431 | 143.59 | 208.14 | 277.6 | 147.94 | 556.39 | 465.12 | 1 | 1 | 0 | 1 | 0 | 0 | 1 | 0 |
| TR152298|c0_g1|m.18840 | Glycine max | Uncharacterized protein |  | 226.34 |  |  |  |  |  |  | 0 | 0 | 0 | 0 | 0 | 0 | 0 | 0 |
| TR155408|c1_g3|m.7314 | Ricinus communis | Sugar transporter, putative | RCOM_1386130 | 31548 | 278.92 | 296.98 | 291.45 | 315.71 | 1018.7 | 1992.3 | 1 | 1 | 0 | 0 | 0 | 0 | 0 | 0 |
| TR99999|c1_g1|m.56693 | Populus trichocarpa | Predicted protein | POPTRDRAFT_553737 | 244.62 |  |  |  | 6.7549 | 17.376 | 16.519 | 1 | 1 | 1 | 1 | 1 | 0 | 0 | 1 |
| TR137251|c0_g11|m.1612 | Amaranthus hypochondriacus | Pyruvate orthophosphate dikinase | ppdk | 580110 | 3694.6 | 3915.5 | 4099.7 | 3846.9 | 22190 | 22798 | 1 | 1 | 0 | 1 | 1 | 0 | 1 | 1 |
| TR137251|c0_g3|m.7550 | Ricinus communis | Pyruvate, phosphate dikinase, chloroplast, putative | RCOM_0678910 | 75231 | 690.43 | 846.29 | 480.4 | 365.09 | 1436.1 | 1190.7 | 0 | 0 | 0 | 0 | 1 | 0 | 0 | 1 |
| TR137251|c0_g7|m.22390 | Ricinus communis | Pyruvate, phosphate dikinase, chloroplast, putative | RCOM_0678910 | 1256900 | 4925.8 | 10318 | 9297.4 | 14012 | 32355 | 37289 | 1 | 1 | 0 | 1 | 1 | 0 | 1 | 1 |
| TR163930|c2_g3|m.58441 | Silene latifolia | ATPase subunit 4 | atp4 | 22647 | 615.35 | 733.48 | 203.75 | 129.67 | 522.24 | 898.4 | 0 | 0 | -1 | 0 | 0 | -1 | 0 | 0 |
| TR137262|c3_g5|m.45842 | Beta vulgaris | ATPase subunit 8 | atp8 | 15472 | 209.04 | 364.86 | 421.71 | 296.74 |  | 114.79 | 0 | 0 | 0 | 0 | 0 | 0 | 0 | 0 |
| TR85700|c0_g11|m.55322 | Ricinus communis | Sec10, putative | RCOM_1616650 | 220.39 |  |  |  |  |  |  | 0 | 0 | 0 | 0 | 0 | 0 | 0 | 0 |
| TR13766|c0_g1|m.33563 | Glycine max | Uncharacterized protein |  | 1408.8 |  |  | 76.936 |  |  |  | 0 | 0 | 1 | 0 | -1 | 0 | 0 | 0 |
| TR138551|c0_g1|m.9376 | Populus trichocarpa | Predicted protein | POPTRDRAFT_707493 | 8348 | 245.22 |  |  |  | 356.45 |  | 0 | 0 | -1 | 0 | 1 | 0 | 0 | 0 |
| TR138551|c1_g2|m.21908 | Populus trichocarpa | Predicted protein | POPTRDRAFT_557583 | 51476 | 597.1 | 586.83 | 349.43 | 216.25 | 949.15 | 886.5 | 0 | 0 | -1 | 1 | 1 | -1 | 1 | 1 |
| TR138552|c0_g2|m.13241 | Vitis vinifera | Putative uncharacterized protein | VIT_05s0077g01760 | 16724 |  | 688.32 |  |  | 308.26 | 435.51 | 0 | 0 | -1 | 0 | 1 | 0 | 0 | 0 |
| TR138559|c1_g2|m.19858 | Populus trichocarpa | Putative uncharacterized protein |  | 44406 | 485.8 | 521.17 | 634.49 | 231.77 | 1795.4 | 1397.5 | 0 | 0 | 0 | 1 | 0 | 0 | 1 | 0 |
| TR153473|c0_g3|m.46618 | Suaeda salsa | Superoxide dismutase | MnSOD | 2840.4 |  |  | 53.369 | 42.378 |  |  | 0 | 0 | 1 | 0 | -1 | 0 | 0 | 0 |
| TR138582|c1_g1|m.6045 | Vitis vinifera | Putative uncharacterized protein | VIT_04s0044g01000 | 1611.9 | 101.37 | 44.415 |  |  | 39.915 | 148.48 | 0 | 0 | -1 | 0 | 1 | 0 | 0 | 0 |
| TR138584|c0_g3|m.26895 | Salicornia europaea | 33 kDa protein of the oxygen-evolving complex | OEE1 | 816780 | 12676 | 15019 | 9006.9 | 13961 | 18323 | 16571 | 0 | 0 | 0 | 0 | 0 | 0 | 0 | 0 |
| TR138600|c5_g3|m.32176 | Beta vulgaris | NADH-ubiquinone oxidoreductase chain 5 | nad5 | 661.97 |  |  | 26.317 |  |  |  | 0 | 0 | 1 | 0 | -1 | 0 | 0 | 0 |
| TR138610|c0_g4|m.12466 | Picrorhiza kurrooa | Monodehydroascorbate reductase | mdhar | 129860 | 1435 | 1683.3 | 700.66 | 753.46 | 4003.2 | 3475.8 | 0 | 0 | -1 | 1 | 1 | -1 | 1 | 1 |
| TR138615|c0_g3|m.20521 | Medicago truncatula | Oxidoreductase, putative | MTR_8g102470 | 27449 | 418.23 | 119.34 | 79.067 | 88.49 | 592.6 | 1154.5 | 0 | 0 | 0 | 0 | 0 | 0 | 0 | 0 |
| TR138635|c0_g7|m.27471 | Beta vulgaris | Isovaleryl-CoA dehydrogenase |  | 3688.4 |  |  | 62.975 | 42.709 |  |  | 0 | 0 | 1 | 0 | -1 | 0 | 0 | 0 |
| TR138714|c1_g1|m.9748 | Populus trichocarpa | Predicted protein | POPTRDRAFT_772510 | 16360 | 140.73 | 131.47 | 159.2 | 125.81 | 224.01 | 216.82 | 1 | 1 | 0 | 1 | 1 | 0 | 1 | 1 |
| TR47233|c0_g1|m.7360 | Ricinus communis | Mitochondrial import receptor subunit tom40, putative | RCOM_1454110 | 11605 | 234.82 | 375.7 | 315.88 | 232.61 | 251.2 | 348.71 | 0 | 0 | 0 | 0 | 0 | 0 | 0 | 0 |
| TR138733|c0_g1|m.5163 | Vitis vinifera | Putative uncharacterized protein | VIT_11s0037g00490 | 2020.6 | 20.949 | 25.401 |  |  | 100.94 | 88.389 | 0 | 0 | -1 | 1 | 1 | 0 | 1 | 0 |
| TR138734|c0_g1|m.18093 | Arabidopsis lyrata | Putative uncharacterized protein | ARALYDRAFT_492196 | 11271 | 262.79 |  | 104.21 | 110.18 | 329.73 | 294.98 | 0 | 0 | -1 | 0 | 1 | -1 | 0 | 1 |
| TR138737|c1_g5|m.6900 | Camellia sinensis | Vacuolar ATP synthase subunit |  | 149150 | 3505.2 | 3207.2 | 1626.6 | 1888.9 | 1299.8 | 1163.3 | 0 | -1 | -1 | -1 | 0 | -1 | -1 | 0 |
| TR138757|c0_g1|m.44230 | Vitis vinifera | Putative uncharacterized protein | VIT_03s0038g04010 | 10456 |  | 129.57 |  | 66.803 | 228.77 | 611.12 | 0 | 0 | 0 | 0 | 0 | 0 | 0 | 0 |
| TR138760|c0_g8|m.59076 | Populus trichocarpa | 60S ribosomal protein L27 | POPTRDRAFT_560241 | 39788 | 405.38 | 523.1 | 508.27 | 450.12 | 1630.7 | 1362.2 | 1 | 1 | 0 | 1 | 1 | 0 | 1 | 1 |
| TR58508|c0_g1|m.36384 | Populus trichocarpa | Predicted protein | POPTRDRAFT_830109 | 173.38 |  |  |  |  |  |  | 0 | 0 | 0 | 0 | 0 | 0 | 0 | 0 |
| TR138796|c1_g1|m.9246 | Pinus sylvestris | Water-stress-inducible protein (Fragment) | lp3-2 | 383.7 |  |  |  |  |  |  | 0 | 0 | 0 | 0 | 0 | 0 | 0 | 0 |
| TR149931|c0_g3|m.10114 | Ricinus communis | RNA-binding protein, putative | RCOM_1408480 | 2107.9 |  |  |  |  |  |  | 0 | 0 | 0 | 0 | 0 | 0 | 0 | 0 |
| TR41894|c0_g1|m.546 | Populus trichocarpa | Predicted protein | POPTRDRAFT_827713 | 56840 | 575.85 | 565.12 | 1270.8 | 776.76 | 1582.7 | 1667 | 1 | 1 | 0 | 1 | 0 | 0 | 1 | 0 |
| TR138944|c0_g1|m.6713 | Arabidopsis thaliana | Heat shock 70kDa protein 1/8 | HSC70-1 | 24120 | 363.68 | 307.68 | 179.77 | 187.32 | 471.76 | 282.58 | 0 | 0 | -1 | 0 | 0 | -1 | 0 | 0 |
| TR74921|c0_g1|m.25162 | Maackia amurensis | 14-3-3 protein homolog |  | 101470 | 1353.6 | 1387.6 | 1270.6 | 798.62 | 1874.7 | 1780.1 | 0 | 0 | 0 | 0 | 0 | 0 | 0 | 0 |
| TR13912|c0_g1|m.44190 | Vitis vinifera | Putative uncharacterized protein | VIT_08s0058g00320 | 2066.8 | 41.187 | 127.82 | 28.6 |  | 96.661 |  | 0 | 0 | 0 | 0 | 0 | 0 | 0 | 0 |
| TR62013|c0_g1|m.45941 | Lotus japonicus | Uncharacterized protein |  | 363350 | 2389.7 | 1957.7 | 968.08 | 459.24 | 9809.3 | 8331.1 | 0 | 0 | -1 | 1 | 1 | -1 | 1 | 1 |
| TR139365|c0_g2|m.17591 | Prunus armeniaca | Phytoene desaturase |  | 299.95 |  |  |  |  |  |  | 0 | 0 | 0 | 0 | 0 | 0 | 0 | 0 |
| TR139393|c0_g1|m.44827 | Arabidopsis lyrata | Ketose-bisphosphate aldolase class-II family protein | ARALYDRAFT_472044 | 332.28 | 14.533 |  | 2.6028 |  | 20.03 |  | 0 | 0 | 0 | 0 | 0 | 0 | 0 | 0 |
| TR139373|c0_g3|m.788 | Vitis vinifera | Putative uncharacterized protein | VIT_18s0076g00310 | 162.72 |  | 7.8086 | 30.292 | 11.257 |  |  | 0 | 0 | 0 | -1 | -1 | 0 | 0 | 0 |
| TR148452|c0_g2|m.10415 | Vitis vinifera | Putative uncharacterized protein | VIT_14s0066g02390 | 32.991 |  |  |  |  |  |  | 0 | 0 | 0 | 0 | 0 | 0 | 0 | 0 |
| TR154210|c0_g1|m.41845 | Vitis vinifera | Putative uncharacterized protein | VITISV_042645 | 939.5 | 9.6817 | 42.72 | 7.2911 | 8.7948 |  | 9.023 | 0 | 0 | 0 | 0 | 0 | 0 | 0 | 0 |
| TR139428|c2_g1|m.3113 | Glycine max | Uncharacterized protein | Gma.1363 | 584.52 | 11.956 |  | 26.382 | 19.058 |  | 7.8027 | 0 | 0 | 0 | 0 | 0 | 0 | 0 | 0 |
| TR139444|c5_g7|m.57944 | Ricinus communis | ATP binding protein, putative | RCOM_0906040 | 2307.1 |  |  |  |  |  | 53.908 | 0 | 0 | 0 | 1 | 1 | 0 | 0 | 0 |
| TR13946|c0_g1|m.37538 | Ricinus communis | Chaperone clpb, putative | RCOM_1469930 | 5358.9 |  |  |  |  | 152.99 | 503.85 | 0 | 0 | 0 | 1 | 1 | 0 | 0 | 0 |
| TR3980|c0_g1|m.13887 | Vitis vinifera | Putative uncharacterized protein | VIT_15s0046g01760 | 1762.3 |  |  |  |  |  |  | 0 | 0 | 0 | 0 | 0 | 0 | 0 | 0 |
| TR139714|c0_g3|m.13596 | Vitis vinifera | Putative uncharacterized protein | VIT_05s0020g02540 | 3343.4 |  |  |  | 29.441 | 33.384 |  | 1 | 1 | 1 | 1 | 0 | 0 | 0 | 0 |
| TR139739|c3_g1|m.27023 | Glycine max | Uncharacterized protein | Gma.50706 | 1349.4 |  | 34.188 |  |  |  |  | 0 | 0 | -1 | -1 | 0 | 0 | 0 | 0 |
| TR13974|c1_g1|m.6169 | Ferocactus wislizeni | Chloroplast small heat shock protein | shSP | 91626 |  | 44.513 | 26.294 |  | 942.94 | 4522.8 | 0 | 0 | 0 | 0 | 0 | 0 | 0 | 0 |
| TR139758|c0_g1|m.63133 | Vitis vinifera | Putative uncharacterized protein | VIT_16s0039g00920 | 108.64 |  |  |  |  |  |  | 0 | 0 | 0 | 0 | 0 | 0 | 0 | 0 |
| TR95492|c0_g1|m.42156 | Atriplex canescens | Putative DNA binding protein |  | 28272 | 744.74 | 293.38 | 488.52 | 399.83 | 504.5 | 606.46 | 0 | 0 | 0 | 0 | 0 | 0 | 0 | 0 |
| TR139770|c0_g1|m.58949 | Vitis vinifera | Putative uncharacterized protein | VIT_11s0016g02830 | 216.8 |  |  |  |  |  |  | 0 | 0 | 0 | 0 | 0 | 0 | 0 | 0 |
| TR139776|c0_g1|m.32528 | Vitis vinifera | Putative uncharacterized protein | VIT_04s0008g07020 | 3036.9 | 45.057 | 130.32 |  | 28.208 |  | 100.81 | 0 | 0 | 0 | 0 | 0 | 0 | 0 | 0 |
| TR139783|c2_g2|m.4307 | Ricinus communis | Electron transporter, putative | RCOM_1324230 | 8782.4 | 19.095 | 75.54 |  |  | 213.58 | 124.43 | 0 | 0 | -1 | 0 | 1 | 0 | 0 | 0 |
| TR139801|c0_g1|m.60747 | Vitis vinifera | Putative uncharacterized protein | VITISV_017535 | 5302.1 | 93.826 | 136.49 | 63.274 | 106.37 | 274.37 |  | 0 | 0 | 0 | 0 | 0 | 0 | 0 | 0 |
| TR139815|c0_g4|m.51804 | Vitis vinifera | Putative uncharacterized protein | VIT_08s0105g00460 | 6979 | 66.802 | 73.885 | 128.4 | 21.209 | 127.38 | 129.31 | 0 | 0 | 0 | 1 | 0 | 0 | 1 | 0 |
| TR155894|c2_g2|m.31072 | Populus trichocarpa | Predicted protein | POPTRDRAFT_709341 | 40361 | 606.92 | 1039.9 | 225.98 | 148.2 | 1710.3 | 1156.5 | 0 | 0 | 0 | 0 | 1 | 0 | 0 | 1 |
| TR139817|c1_g2|m.58500 | Amblyomma maculatum | Putative uncharacterized protein |  | 1315.5 | 30.743 |  |  | 51.786 | 56.353 |  | 1 | 1 | 0 | 0 | 0 | 0 | 0 | 0 |
| TR97446|c0_g4|m.42340 | Ricinus communis | Protein transport protein sec23, putative | RCOM_1648230 | 3488.3 | 44.57 | 77.812 | 70.602 | 88.839 |  |  | 0 | 0 | 0 | -1 | -1 | 0 | 0 | 0 |
| TR139843|c0_g1|m.33193 | Populus trichocarpa | Predicted protein | POPTRDRAFT_549568 | 10241 | 187.64 | 237.31 | 191.54 |  |  |  | 0 | -1 | 0 | -1 | -1 | 0 | 0 | 0 |
| TR139850|c0_g3|m.41616 | Vitis vinifera | Isopentenyl diphosphate isomerase II(IPI2) |  | 565.94 |  |  |  |  |  |  | 0 | 0 | 0 | 0 | 0 | 0 | 0 | 0 |
| TR139869|c0_g2|m.45522 | Glycine max | Uncharacterized protein | Gma.2640 | 1041 |  |  |  |  |  |  | 0 | 0 | 0 | 0 | 0 | 0 | 0 | 0 |
| TR139875|c1_g4|m.29167 | Vitis vinifera | Putative uncharacterized protein | VIT_04s0210g00050 | 1420.9 | 25.439 |  | 31.642 | 16.152 |  | 35.399 | 0 | 0 | 0 | 0 | 0 | 0 | 0 | 0 |
| TR140334|c0_g3|m.2447 | Vitis vinifera | Putative uncharacterized protein | VIT_08s0007g02190 | 121270 | 757.05 | 2176.8 | 544.64 | 256.54 | 7377.7 | 3242.1 | 0 | 0 | 0 | 0 | 0 | 0 | 0 | 0 |
| TR86362|c0_g1|m.51811 | Vitis vinifera | Putative uncharacterized protein | VIT_01s0011g01900 | 4319.8 |  | 44.648 | 83.1 |  |  | 54.606 | 0 | 0 | 0 | 0 | 0 | 0 | 0 | 0 |
| TR140350|c0_g4|m.20448 | Ricinus communis | Small rubber particle protein, putative | RCOM_1080400 | 1234.9 |  |  |  | 43.922 |  |  | 0 | 0 | 1 | 0 | -1 | 0 | 0 | 0 |
| TR140357|c0_g6|m.46883 | Populus trichocarpa | Putative uncharacterized protein |  | 283410 | 4999.1 | 5679 | 2805.2 | 2477.6 | 1511.3 | 366.07 | 0 | -1 | -1 | -1 | 0 | -1 | -1 | 0 |
| TR140367|c1_g4|m.20622 | Oryza sativa | Putative uncharacterized protein | OsJ_03802 | 1615.7 |  |  | 30.812 |  |  | 405.78 | 1 | 1 | 1 | 1 | 0 | 0 | 0 | 0 |
| TR140371|c1_g1|m.26729 | Ricinus communis | WD-repeat protein, putative | RCOM_1046940 | 2291.9 |  |  |  |  |  |  | 0 | 0 | 0 | 0 | 0 | 0 | 0 | 0 |
| TR148247|c0_g1|m.40273 | Vitis vinifera | Putative uncharacterized protein | VIT_12s0035g00760 | 902.92 |  |  |  |  | 45.141 |  | 0 | 0 | 0 | 1 | 1 | 0 | 0 | 0 |
| TR140380|c1_g1|m.58405 | Actinidia latifolia | GDP-D-mannose pyrophosphorylase | GMP | 3633.7 | 10.2 | 13.736 | 5.9842 |  | 225.06 | 42.882 | 0 | 0 | 0 | 0 | 0 | 0 | 0 | 0 |
| TR159670|c0_g2|m.55280 | Vitis vinifera | Putative uncharacterized protein | VIT_17s0000g06180 | 3613.5 | 37.365 | 33.545 |  |  |  | 146.94 | 0 | 0 | -1 | 1 | 1 | 0 | 1 | 0 |
| TR14105|c0_g1|m.45038 | Solanum lycopersicum | Beta-tubulin | TUB | 6924 |  |  |  | 113.92 |  |  | 0 | 0 | 1 | 0 | -1 | 0 | 0 | 0 |
| TR141451|c1_g1|m.3631 | Ricinus communis | ATP-dependent (S)-NAD(P)H-hydrate dehydratase | RCOM_0913490 | 3158.9 |  | 118.82 |  |  | 255.41 |  | 0 | 0 | -1 | 0 | 1 | 0 | 0 | 0 |
| TR148758|c0_g1|m.18017 | Ricinus communis | Serine/threonine protein kinase, putative | RCOM_0705590 | 1666.7 |  |  |  | 43.259 | 88.926 | 21.448 | 1 | 1 | 1 | 1 | 0 | 0 | 0 | 0 |
| TR141468|c2_g1|m.49066 | Medicago truncatula | Putative uncharacterized protein | MTR_3g117600 | 455.13 |  | 63.962 |  |  |  |  | 0 | 0 | -1 | -1 | 0 | 0 | 0 | 0 |
| TR95484|c0_g2|m.61127 | Populus trichocarpa | Predicted protein | POPTRDRAFT_744891 | 12214 | 249.46 | 100.53 | 163.66 | 80.875 | 291.85 | 167.94 | 0 | 0 | 0 | 0 | 0 | 0 | 0 | 0 |
| TR141476|c0_g10|m.31552 | Dimocarpus longan | Triosephosphate isomerase |  | 304010 | 3319.7 | 4141.6 | 2230.7 | 1685.5 | 11840 | 11136 | 0 | 0 | 0 | 1 | 1 | 0 | 1 | 1 |
| TR141484|c0_g2|m.38185 | Ricinus communis | Protein transporter, putative | RCOM_1325470 | 1373.5 | 115.33 | 110.3 |  |  |  | 40.759 | 0 | 0 | -1 | -1 | 1 | 0 | -1 | 0 |
| TR141495|c2_g10|m.39265 | Lotus japonicus | Peptidyl-prolyl cis-trans isomerase |  | 53850 | 572.6 | 434.27 | 328.89 | 249.61 | 2475.2 | 694.48 | 0 | 0 | 0 | 0 | 0 | 0 | 0 | 0 |
| TR141513|c3_g2|m.28261 | Elaeis guineensis | Translation initiation factor |  | 2420.9 | 36.168 | 118.04 | 50.089 | 31.974 |  | 355.89 | 0 | 0 | 0 | 0 | 1 | 0 | 0 | 1 |
| TR38941|c0_g1|m.52340 | Nicotiana benthamiana | PHB2 |  | 30077 | 412.89 | 285.79 | 85.189 | 48.118 | 135.91 | 337.38 | 0 | 0 | 0 | 0 | 0 | 0 | 0 | 0 |
| TR141928|c1_g1|m.61019 | Ricinus communis | Putative uncharacterized protein | RCOM_0172840 | 30864 |  |  | 3044.2 |  |  |  | 0 | 0 | 1 | 0 | -1 | 0 | 0 | 0 |
| TR141962|c0_g2|m.17335 | Ricinus communis | Kinase, putative | RCOM_0733440 | 599.68 |  |  |  |  |  |  | 0 | 0 | 0 | 0 | 0 | 0 | 0 | 0 |
| TR141969|c0_g5|m.61281 | Arabidopsis lyrata | Putative uncharacterized protein | ARALYDRAFT_481979 | 7775.2 |  | 269.27 | 248.15 | 189.39 | 81.006 |  | 0 | -1 | 0 | 0 | 0 | 0 | 0 | 0 |
| TR97457|c0_g3|m.29867 | Vitis vinifera | Putative uncharacterized protein | VIT_17s0000g03490 | 14047 | 99.008 | 123.25 | 108.27 | 68.547 | 470.89 | 267.71 | 0 | 0 | 0 | 0 | 0 | 0 | 0 | 0 |
| TR141988|c1_g1|m.39389 | Didierea madagascariensis | 50S ribosomal protein L2 (Fragment) | rpl2 | 9969.7 | 79.082 | 105.95 | 93.633 | 38.868 | 405.86 |  | 0 | 0 | 0 | 1 | 0 | 0 | 1 | 0 |
| TR146005|c0_g1|m.21810 | Nicotiana tabacum | G-strand specific single-stranded telomere-binding protein 2 | GTBP2 | 3833.7 | 33.572 | 40.648 | 20.997 | 19.315 |  |  | 0 | -1 | -1 | -1 | -1 | -1 | 0 | 0 |
| TR150418|c0_g1|m.27116 | Vitis vinifera | Putative uncharacterized protein | VIT_06s0009g00810 | 1384.9 |  |  |  | 26.906 |  |  | 0 | 0 | 1 | 0 | -1 | 0 | 0 | 0 |
| TR142012|c0_g3|m.17865 | Glycine max | Uncharacterized protein |  | 5042.2 | 24.368 | 39.859 |  |  | 161.08 | 10.564 | 0 | 0 | -1 | 0 | 1 | 0 | 0 | 0 |
| TR143692|c0_g8|m.16965 | Glycine max | Putative uncharacterized protein |  | 139360 | 1375.3 | 1178.8 | 1283 | 1110.4 | 4730.3 | 4649.5 | 0 | 0 | 0 | 1 | 1 | 0 | 1 | 1 |
| TR143735|c1_g7|m.44400 | Vitis vinifera | Putative uncharacterized protein | VIT_09s0002g02330 | 5096.7 | 99.203 | 19.39 | 24.077 |  |  |  | 0 | -1 | 0 | -1 | -1 | 0 | 0 | 0 |
| TR143748|c0_g10|m.971 | Ricinus communis | Putative uncharacterized protein | RCOM_1606460 | 1043.6 |  |  |  |  |  |  | 0 | 0 | 0 | 0 | 0 | 0 | 0 | 0 |
| TR143752|c1_g5|m.60810 | Glycine max | Uncharacterized protein |  | 125070 | 1512.8 | 1611.5 | 2442.2 | 1659.4 | 916.55 | 1167.5 | 0 | 0 | 0 | 0 | 0 | 0 | 0 | 0 |
| TR143758|c0_g6|m.2204 | Vitis vinifera | Putative uncharacterized protein | VITISV_008818 | 1534 |  |  |  |  | 428.42 |  | 0 | 0 | 0 | 1 | 1 | 0 | 0 | 0 |
| TR143758|c1_g4|m.52009 | Zea mays | Uncharacterized protein |  | 1159.1 |  |  |  |  |  |  | 0 | 0 | 0 | 0 | 0 | 0 | 0 | 0 |
| TR14396|c0_g2|m.57952 | Ricinus communis | Tubulin beta chain, putative | RCOM_1598040 | 1536.4 |  |  |  |  |  |  | 0 | 0 | 0 | 0 | 0 | 0 | 0 | 0 |
| TR145961|c0_g1|m.22168 | Ricinus communis | Poly(RC)-binding protein, putative | RCOM_0607560 | 20682 | 366.87 | 598.48 | 338.95 | 178.88 |  |  | 0 | -1 | 0 | -1 | -1 | 0 | 0 | 0 |
| TR144382|c0_g2|m.51304 | Vitis vinifera | Putative uncharacterized protein | VIT_01s0026g01630 | 1946.4 | 61.565 | 73.756 | 9.1037 | 8.8991 |  | 47.002 | 0 | 0 | -1 | 0 | 1 | -1 | 0 | 1 |
| TR144392|c0_g19|m.13291 | Dianthus caryophyllus | Alcohol dehydrogenase |  | 12425 | 15.537 |  |  |  | 138.61 | 131.94 | 0 | 0 | -1 | 1 | 1 | 0 | 1 | 0 |
| TR144405|c0_g1|m.60933 | Vitis vinifera | Putative uncharacterized protein | VIT_01s0010g03620 | 4126.5 |  |  | 268.76 | 168.24 | 64.916 | 73.983 | 0 | 0 | 1 | 1 | 0 | 0 | 0 | 0 |
| TR144416|c0_g1|m.32055 | Vitis vinifera | Superoxide dismutase [Cu-Zn] | VIT_08s0007g07280 | 4311.5 | 7.5112 | 375.64 |  | 23.776 |  |  | 0 | -1 | 0 | -1 | -1 | 0 | 0 | 0 |
| TR144437|c0_g1|m.51699 | Glycine max | Uncharacterized protein |  | 8936.5 | 292.42 | 315.69 | 122.67 | 14.294 | 618.82 |  | 0 | 0 | 0 | 1 | 0 | 0 | 1 | 0 |
| TR144455|c0_g1|m.19847 | Vitis vinifera | Putative uncharacterized protein | VIT_18s0072g00770 | 18321 | 540.47 | 462.58 | 97.474 | 172.91 | 266.69 | 568.44 | 0 | 0 | -1 | 0 | 0 | -1 | 0 | 0 |
| TR144468|c0_g10|m.33371 | Vitis vinifera | Putative uncharacterized protein | VIT_07s0005g03640 | 397.25 |  |  |  |  |  |  | 0 | 0 | 0 | 0 | 0 | 0 | 0 | 0 |
| TR144469|c0_g2|m.60420 | Jatropha curcas | JHL18I08.13 protein | JHL18I08.13 | 3627.4 | 232.71 |  | 171.03 |  |  |  | 0 | -1 | 0 | -1 | -1 | 0 | 0 | 0 |
| TR144478|c2_g1|m.40311 | Vitis vinifera | Putative uncharacterized protein | VIT_15s0048g01980 | 1092.3 |  | 19.728 |  | 11.495 | 45.217 |  | 0 | 0 | 0 | 0 | 0 | 0 | 0 | 0 |
| TR155898|c0_g2|m.2762 | Vitis vinifera | Putative uncharacterized protein | VIT_10s0042g00800 | 14637 | 109.61 | 98.889 | 223.53 | 138.75 | 626.07 | 464.69 | 1 | 1 | 0 | 1 | 0 | 0 | 1 | 0 |
| TR144502|c0_g1|m.50454 | Populus trichocarpa | Lipoxygenase | POPTRDRAFT_832809 | 10425 | 113.13 | 122.59 | 365.45 | 400.98 |  |  | 0 | 0 | 1 | -1 | -1 | 1 | 0 | 0 |
| TR144507|c1_g2|m.51714 | Glycine max | Uncharacterized protein | Gma.6866 | 150.57 |  |  |  |  |  |  | 0 | 0 | 0 | 0 | 0 | 0 | 0 | 0 |
| TR144514|c0_g1|m.34949 | Vitis vinifera | ATP-dependent Clp protease proteolytic subunit | VIT_14s0060g02160 | 1731.2 | 45.154 | 98.194 | 36.14 |  | 63.354 | 74.274 | 0 | 0 | 0 | 0 | 0 | 0 | 0 | 0 |
| TR144523|c0_g1|m.762 | Vitis vinifera | Putative uncharacterized protein | VIT_11s0016g05700 | 536.32 |  |  |  |  | 75.327 | 67.729 | 0 | 0 | 0 | 1 | 1 | 0 | 0 | 0 |
| TR144527|c1_g1|m.35721 | Ricinus communis | Chaperonin-60kD, ch60, putative | RCOM_1023530 | 3884.7 | 49.563 | 97.802 | 106.62 | 15.01 |  | 29.328 | 0 | -1 | 0 | 0 | 0 | 0 | 0 | 0 |
| TR144530|c0_g6|m.1436 | Vitis vinifera | Putative uncharacterized protein | VIT_10s0042g01220 | 1919.9 |  |  |  |  |  |  | 0 | 0 | 0 | 0 | 0 | 0 | 0 | 0 |
| TR50294|c0_g2|m.13730 | Ananas comosus | Chitinase C | plchiC | 95903 | 1489.3 | 1674.8 | 53.066 | 75.545 | 1987.9 | 2552.8 | 0 | 0 | -1 | 0 | 1 | -1 | 0 | 1 |
| TR1450|c0_g1|m.11856 | Ricinus communis | 60S ribosomal protein L18, putative | RCOM_1178700 | 1799 |  |  |  |  |  |  | 0 | 0 | 0 | 0 | 0 | 0 | 0 | 0 |
| TR145041|c1_g1|m.54863 | Spinacia oleracea | Enolase | eno | 1352800 | 13347 | 11543 | 4477.5 | 7741.8 | 48751 | 42822 | 0 | 0 | 0 | 1 | 1 | 0 | 1 | 1 |
| TR145041|c1_g5|m.10662 | Spinacia oleracea | Enolase | eno | 708730 | 5273.6 | 5519.5 | 3001.5 | 3292.3 | 27917 | 16519 | 0 | 0 | -1 | 0 | 0 | -1 | 0 | 0 |
| TR145041|c1_g6|m.5965 | Spinacia oleracea | Enolase | eno | 7898.1 | 154.93 |  |  |  | 419.06 | 119.35 | 0 | 0 | -1 | 0 | 1 | 0 | 0 | 0 |
| TR154263|c0_g1|m.48245 | Vitis vinifera | Elongation factor Tu | VIT_07s0104g00600 | 27863 | 229.36 | 71.356 | 766.13 | 113.59 | 648.48 | 257.03 | 1 | 1 | 0 | 0 | 0 | 0 | 0 | 0 |
| TR145058|c0_g1|m.42006 | Glycine max | Uncharacterized protein | Gma.35508 | 768.98 |  |  |  | 19.603 |  |  | 0 | 0 | 1 | 0 | -1 | 0 | 0 | 0 |
| TR145062|c0_g1|m.36274 | Amaranthus retroflexus | Pollen allergen MetE (Fragment) |  | 209140 | 2200 | 2990.8 | 1553.2 | 968.71 | 5729.2 | 5874.1 | 0 | 0 | 0 | 1 | 1 | 0 | 1 | 1 |
| TR159691|c0_g5|m.47126 | Citrus sinensis | Cinnamyl alcohol dehydrogenase | CAD | 10033 | 36.888 | 74.691 | 86.533 | 32.204 | 332.7 | 331.94 | 1 | 1 | 0 | 1 | 1 | 0 | 1 | 1 |
| TR145070|c0_g3|m.53116 | Vitis vinifera | Putative uncharacterized protein | VIT_05s0077g00860 | 640.71 |  |  |  |  | 118.08 |  | 0 | 0 | 0 | 1 | 1 | 0 | 0 | 0 |
| TR145079|c0_g2|m.61315 | Ricinus communis | Amino acid binding protein, putative | RCOM_0727690 | 4926.2 |  | 95.004 |  | 48.703 |  | 250.34 | 0 | 0 | 0 | 0 | 0 | 0 | 0 | 0 |
| TR145085|c3_g10|m.3612 | Populus trichocarpa | Predicted protein | POPTRDRAFT_657667 | 98422 | 793.16 | 1762.6 |  |  | 9057 | 7059.8 | 0 | 0 | -1 | 1 | 1 | 0 | 1 | 0 |
| TR145085|c3_g7|m.39453 | Solanum tuberosum | Putative uncharacterized protein |  | 7756.1 |  |  | 103.99 |  | 176.86 |  | 1 | 1 | 1 | 1 | 0 | 0 | 0 | 0 |
| TR145087|c0_g4|m.58333 | Populus trichocarpa | Predicted protein | POPTRDRAFT_743889 | 1567.1 |  |  | 94.677 |  |  |  | 0 | 0 | 1 | 0 | -1 | 0 | 0 | 0 |
| TR145095|c0_g1|m.25641 | Medicago truncatula | Putative uncharacterized protein | MTR_4g113100 | 1831.8 | 23.789 |  | 18.953 | 208.94 |  |  | 0 | 0 | 0 | -1 | -1 | 0 | 0 | 0 |
| TR145099|c0_g1|m.7347 | Ricinus communis | Heat shock protein, putative | RCOM_0483320 | 7247.4 | 109.49 | 46.305 | 53.377 | 37.868 | 301.6 | 135.98 | 0 | 0 | 0 | 0 | 0 | 0 | 0 | 0 |
| TR159707|c0_g1|m.32938 | Amaranthus cruentus | Soluble starch synthase I | SSSI | 26693 | 171.9 | 296.07 | 175.36 | 95.125 | 777.89 | 597.19 | 0 | 0 | 0 | 0 | 1 | 0 | 0 | 1 |
| TR145116|c1_g2|m.43840 | Sorghum bicolor | Putative uncharacterized protein Sb01g028940 | Sb01g028940 | 4950.5 | 32.3 |  | 53.637 | 69.833 | 35.2 |  | 0 | 0 | 0 | 0 | 0 | 0 | 0 | 0 |
| TR145119|c0_g21|m.55435 | Glycine max | Uncharacterized protein | Gma.29813 | 121.84 |  |  |  |  |  |  | 0 | 0 | 0 | 0 | 0 | 0 | 0 | 0 |
| TR145125|c0_g1|m.2302 | Vitis vinifera | Putative uncharacterized protein | VIT_07s0005g00480 | 481.78 |  |  |  |  |  |  | 0 | 0 | 0 | 0 | 0 | 0 | 0 | 0 |
| TR149953|c0_g7|m.27549 | Lotus japonicus | Uncharacterized protein |  | 16835 | 321.11 | 162.88 | 331.43 | 127.66 | 74.188 | 484.17 | 0 | -1 | 0 | 0 | 0 | 0 | 0 | 0 |
| TR88313|c0_g2|m.2520 | Populus trichocarpa | Predicted protein | POPTRDRAFT_825953 | 7105.2 | 94.773 | 113.67 |  | 83.666 | 236.16 | 157.23 | 0 | 0 | 0 | 0 | 0 | 0 | 0 | 0 |
| TR88554|c1_g3|m.13117 | Picea sitchensis | Putative uncharacterized protein |  | 31503 | 246.89 | 209.55 | 258.88 | 101.05 | 554.83 | 1062.2 | 0 | 0 | 0 | 0 | 0 | 0 | 0 | 0 |
| TR91304|c0_g1|m.712 | Glycine max | Putative uncharacterized protein |  | 2612.2 |  |  |  |  |  |  | 0 | 0 | 0 | 0 | 0 | 0 | 0 | 0 |
| TR62386|c0_g1|m.56029 | Ricinus communis | Putative uncharacterized protein | RCOM_1338890 | 907.4 |  |  |  |  | 87.725 |  | 0 | 0 | 0 | 1 | 1 | 0 | 0 | 0 |
| TR145982|c0_g6|m.61314 | Vitis vinifera | Putative uncharacterized protein | VIT_15s0048g00670 | 272.22 |  |  |  | 42.741 |  |  | 0 | 0 | 1 | 0 | -1 | 0 | 0 | 0 |
| TR145983|c1_g7|m.29003 | Lotus japonicus | Uncharacterized protein |  | 15835 | 152.29 | 202.81 | 304.82 | 165.99 |  | 229.75 | 1 | 1 | 0 | 0 | 0 | 0 | 0 | 0 |
| TR88540|c0_g3|m.31397 | Glycine max | Putative uncharacterized protein |  | 239130 | 2941.8 | 3245 | 1546.8 | 1206.9 | 9454.3 | 5428.1 | 0 | 0 | -1 | 0 | 0 | -1 | 0 | 0 |
| TR146007|c0_g5|m.46392 | Vitis vinifera | Putative uncharacterized protein | VIT_08s0007g07460 | 34795 | 301.83 | 359.62 | 290.36 | 209.7 | 1126.8 | 895.83 | 0 | 0 | 0 | 1 | 1 | 0 | 1 | 1 |
| TR146008|c1_g2|m.46093 | Lotus japonicus | Uncharacterized protein |  | 32831 | 138.36 | 322.95 | 445.21 | 112.61 | 226.65 | 1060.5 | 1 | 1 | 0 | 0 | 0 | 0 | 0 | 0 |
| TR146024|c0_g2|m.41203 | Gossypium hirsutum | Annexin |  | 52322 | 584.11 | 451.4 | 384.77 | 338.09 | 2621.9 | 3780.9 | 0 | 0 | 0 | 1 | 1 | 0 | 1 | 1 |
| TR81468|c0_g2|m.51316 | Picea sitchensis | Putative uncharacterized protein |  | 31978 | 166.87 | 305.11 | 314.76 | 323.99 | 605 | 1133.2 | 1 | 1 | 0 | 0 | 0 | 0 | 0 | 0 |
| TR146143|c0_g1|m.53593 | Vitis vinifera | Putative uncharacterized protein | VIT_08s0058g00090 | 3507.3 | 33.065 | 46.976 | 56.293 | 37.173 | 122.97 | 123.39 | 1 | 1 | 0 | 1 | 1 | 0 | 1 | 1 |
| TR146152|c0_g13|m.48462 | Vitis vinifera | Putative uncharacterized protein | VIT_01s0127g00840 | 2826.7 |  |  | 68.825 |  |  |  | 0 | 0 | 1 | 0 | -1 | 0 | 0 | 0 |
| TR69119|c0_g1|m.50631 | Ricinus communis | Putative uncharacterized protein | RCOM_0297010 | 13627 | 434.75 | 415.5 | 69.413 | 168.03 | 177.5 |  | 0 | 0 | -1 | -1 | 0 | -1 | -1 | 0 |
| TR146171|c0_g1|m.46545 | Ricinus communis | Putative uncharacterized protein | RCOM_0708170 | 17075 | 222.68 | 549.17 | 153.99 | 7.2844 | 781.34 | 699.31 | 0 | 0 | 0 | 0 | 1 | 0 | 0 | 1 |
| TR156976|c0_g2|m.57956 | Vitis vinifera | Putative uncharacterized protein | VIT_14s0108g00080 | 172490 | 1396.4 | 1243.6 | 682.4 | 475.17 | 5049.9 | 5338.3 | 0 | 0 | -1 | 1 | 1 | -1 | 1 | 1 |
| TR31654|c3_g1|m.5082 | Solanum lycopersicum | Harpin binding protein 1 | HrBP1 | 154470 | 3076.8 | 3617.4 | 1939.8 | 1579.1 | 1666.5 | 1727.5 | 0 | -1 | -1 | -1 | 0 | -1 | -1 | 0 |
| TR146181|c0_g1|m.10277 | Lotus japonicus | Uncharacterized protein |  | 7248.3 |  |  |  |  | 966.78 | 937.68 | 0 | 0 | 0 | 1 | 1 | 0 | 0 | 0 |
| TR146181|c0_g4|m.22669 | Vitis vinifera | Putative uncharacterized protein | VITISV_021756 | 29101 | 253.3 | 248.55 | 117.62 | 228.53 | 874.48 | 410.34 | 0 | 0 | 0 | 0 | 0 | 0 | 0 | 0 |
| TR146185|c1_g1|m.46752 | Vitis vinifera | Putative uncharacterized protein | VIT_16s0050g01140 | 5282.3 | 63.397 | 64.579 | 197.09 |  |  |  | 0 | 0 | 1 | -1 | -1 | 1 | 0 | 0 |
| TR146185|c1_g2|m.50009 | Ricinus communis | Catalytic, putative | RCOM_1582190 | 10060 |  |  | 108.71 |  |  |  | 0 | 0 | 1 | 0 | -1 | 0 | 0 | 0 |
| TR146189|c0_g1|m.46301 | Populus trichocarpa | Predicted protein | POPTRDRAFT_553283 | 943.85 |  |  |  |  | 123.54 | 98.815 | 0 | 0 | 0 | 1 | 1 | 0 | 0 | 0 |
| TR146193|c0_g4|m.24031 | Elaeis guineensis | 24 kDa seed maturation protein |  | 7746.3 | 103.93 | 107.52 | 261 | 270.09 |  |  | 0 | 0 | 1 | -1 | -1 | 1 | 0 | 0 |
| TR146230|c0_g2|m.54963 | Populus trichocarpa | Predicted protein | POPTRDRAFT_708479 | 3835 |  |  |  |  |  |  | 0 | 0 | 0 | 0 | 0 | 0 | 0 | 0 |
| TR50210|c0_g3|m.9642 | Vitis vinifera | Putative uncharacterized protein | VITISV_015457 | 4071.3 |  |  |  | 32.682 |  | 242.78 | 1 | 1 | 1 | 1 | 0 | 0 | 0 | 0 |
| TR146235|c1_g5|m.49554 | Vitis vinifera | Putative uncharacterized protein | VIT_10s0003g03090 | 12094 | 183.64 | 490.32 | 286.58 | 78.433 | 279.1 | 150.78 | 0 | 0 | 0 | 0 | 0 | 0 | 0 | 0 |
| TR148151|c2_g4|m.4383 | Ricinus communis | Heat shock protein, putative | RCOM_1442270 | 76835 | 275 | 491.53 | 181.01 | 225.21 | 1900.7 | 1206.4 | 0 | 0 | 0 | 0 | 0 | 0 | 0 | 0 |
| TR148164|c0_g2|m.55026 | Glycine max | Uncharacterized protein | Gma.377 | 6051.4 | 62.493 | 67.311 | 49.622 | 49.378 | 89.834 | 264.74 | 0 | 0 | 0 | 0 | 0 | 0 | 0 | 0 |
| TR148183|c0_g3|m.31472 | Vitis vinifera | Putative uncharacterized protein | VITISV_012577 | 6621.4 | 121.22 |  |  |  | 153.65 | 170.52 | 0 | 0 | -1 | 0 | 1 | 0 | 0 | 0 |
| TR148195|c0_g2|m.19174 | Ricinus communis | Acetolactate synthase, putative | RCOM_0605940 | 4388.3 | 37.144 | 171.62 | 60.792 | 70.485 | 85.01 |  | 0 | 0 | 0 | 0 | 0 | 0 | 0 | 0 |
| TR95511|c0_g1|m.48395 | Ipomoea batatas | Purple acid phosphatase | pap | 2729.2 | 66.378 | 58.398 | 225.4 | 306.21 |  | 19.331 | 0 | 0 | 1 | 0 | 0 | 1 | 0 | 0 |
| TR148203|c0_g1|m.13495 | Silene latifolia | NADH dehydrogenase subunit 9 | nad9 | 51017 | 559.42 | 759.08 | 323.39 | 456.98 | 989.35 | 859.13 | 0 | 0 | 0 | 0 | 1 | 0 | 0 | 1 |
| TR148211|c0_g1|m.15723 | Scutellaria baicalensis | Superoxide dismutase [Cu-Zn] |  | 207220 | 4575.9 | 4660.8 | 2745.6 | 2594.6 | 569.54 | 2697.5 | 0 | -1 | -1 | 0 | 0 | -1 | 0 | 0 |
| TR148216|c1_g1|m.1089 | Mesembryanthemum crystallinum | Putative mitochondrial adenylate transporter | ANT2 | 212520 | 1971.5 | 2185.9 | 703.67 | 388.06 | 7880.5 | 7190.2 | 0 | 0 | -1 | 1 | 1 | -1 | 1 | 1 |
| TR148221|c0_g4|m.60341 | Ricinus communis | 40S ribosomal protein S19-3, putative | RCOM_0524930 | 137890 | 612.26 | 1377 | 593.07 | 197.32 | 4118.1 | 2514.5 | 0 | 0 | 0 | 0 | 0 | 0 | 0 | 0 |
| TR148221|c1_g13|m.49984 | Ricinus communis | Carbonic anhydrase, putative | RCOM_0544250 | 152580 | 11.3 | 248.53 | 742.98 | 224.4 | 3680.6 | 860.52 | 1 | 1 | 0 | 0 | 0 | 0 | 0 | 0 |
| TR148228|c0_g1|m.33020 | Vitis vinifera | Putative uncharacterized protein | VIT_14s0128g00370 | 15671 | 154.82 | 174.92 | 50.915 | 73.928 | 408.22 | 162.63 | 0 | 0 | -1 | 0 | 0 | -1 | 0 | 0 |
| TR148250|c0_g2|m.21600 | Vitis vinifera | Putative uncharacterized protein | VIT_01s0011g03590 | 667.17 |  |  |  |  |  |  | 0 | 0 | 0 | 0 | 0 | 0 | 0 | 0 |
| TR57174|c0_g1|m.49551 | Glycine max | Uncharacterized protein | Gma.49988 | 13161 | 52.029 | 88.674 | 256.21 | 109.54 | 189 | 224.48 | 1 | 1 | 0 | 1 | 0 | 0 | 1 | 0 |
| TR43209|c0_g1|m.18477 | Glycine max | Uncharacterized protein | Gma.55773 | 33953 | 135.28 | 401.88 | 146.31 |  | 2435.8 | 1147.1 | 0 | 0 | 0 | 0 | 0 | 0 | 0 | 0 |
| TR148264|c0_g3|m.58330 | Populus trichocarpa | Predicted protein (Fragment) | POPTRDRAFT_412234 | 251020 | 1862.5 | 1760.7 | 2950.9 | 2605 | 5297.3 | 5676.4 | 1 | 1 | 1 | 1 | 1 | 1 | 1 | 1 |
| TR148267|c1_g2|m.61652 | Populus trichocarpa | Predicted protein | POPTRDRAFT_642209 | 332.37 | 41.728 | 58.759 | 41.499 |  |  | 61.42 | 0 | 0 | 0 | 0 | 0 | 0 | 0 | 0 |
| TR60639|c1_g1|m.27321 | Ricinus communis | Ran binding protein, putative | RCOM_1474140 | 127030 | 841.93 | 777.86 | 623.67 | 730.55 | 3991.8 | 2044.3 | 0 | 0 | 0 | 0 | 0 | 0 | 0 | 0 |
| TR148275|c0_g1|m.9336 | Arabidopsis lyrata | Alpha-soluble nsf attachment protein | ALPHA-SNAP2 | 31959 | 262.44 | 336.12 | 853.8 | 565.36 | 919.49 | 1064.4 | 1 | 1 | 0 | 1 | 0 | 0 | 1 | 0 |
| TR148281|c0_g1|m.29954 | Poncirus trifoliata | Leucine-rich repeat family protein |  | 52530 | 828.32 | 752.29 | 655.24 | 607.03 | 891.01 | 775.96 | 0 | 0 | 0 | 0 | 0 | 0 | 0 | 0 |
| TR58461|c0_g3|m.27529 | Vitis vinifera | Putative uncharacterized protein | VIT_19s0090g01300 | 738.3 |  |  |  |  |  | 69.626 | 0 | 0 | 0 | 1 | 1 | 0 | 0 | 0 |
| TR148288|c0_g1|m.13591 | Populus trichocarpa | Methionine sulfoxide reductase type (Fragment) | PtrcMsrA2 | 19344 | 365.69 | 14.065 |  | 45.079 |  |  | 0 | -1 | 0 | -1 | -1 | 0 | 0 | 0 |
| TR31727|c0_g1|m.16839 | Populus trichocarpa | Predicted protein | POPTRDRAFT_828781 | 4856.7 | 86.518 | 67.267 | 122.76 | 96.388 | 48.277 | 28.058 | 0 | 0 | 0 | 0 | 0 | 0 | 0 | 0 |
| TR148326|c1_g11|m.24926 | Populus trichocarpa | Predicted protein | POPTRDRAFT_1107359 | 1049.3 |  |  |  |  |  |  | 0 | 0 | 0 | 0 | 0 | 0 | 0 | 0 |
| TR148329|c0_g2|m.54434 | Glycine max | Cytochrome b6-f complex iron-sulfur subunit |  | 160240 | 1178 | 1717.6 | 603.72 | 790.58 | 1130.1 | 2580.2 | 0 | 0 | 0 | 0 | 0 | 0 | 0 | 0 |
| TR7812|c0_g2|m.62911 | Glycine max | Cytochrome b6-f complex iron-sulfur subunit |  | 19515 | 65.323 | 208.66 | 244.16 |  | 406.17 | 27.531 | 0 | 0 | 0 | 0 | 0 | 0 | 0 | 0 |
| TR148333|c0_g3|m.50604 | Populus trichocarpa | Predicted protein | POPTRDRAFT_579131 | 107220 | 273.32 | 222.48 | 11.559 | 41.579 | 2639.7 | 4514.6 | 0 | 0 | -1 | 0 | 0 | -1 | 0 | 0 |
| TR85663|c0_g2|m.21590 | Vitis vinifera | Putative uncharacterized protein | VIT_09s0002g00990 | 1084.5 |  |  | 1084.5 |  |  |  | 0 | 0 | 1 | 0 | -1 | 0 | 0 | 0 |
| TR148434|c0_g4|m.55144 | Ricinus communis | Calcium ion binding protein, putative | RCOM_1601620 | 1116.9 |  | 21.937 |  |  |  | 70.021 | 0 | 0 | -1 | 0 | 1 | 0 | 0 | 0 |
| TR148444|c0_g1|m.28720 | Vitis vinifera | Serine/threonine-protein phosphatase | VIT_07s0104g01030 | 4168.5 | 61.372 | 25.132 | 41.002 | 28.314 | 184.19 | 108.46 | 0 | 0 | 0 | 0 | 0 | 0 | 0 | 0 |
| TR151064|c0_g2|m.1964 | Vitis vinifera | Putative uncharacterized protein | VIT_18s0001g02600 | 38.342 |  |  |  |  |  |  | 0 | 0 | 0 | 0 | 0 | 0 | 0 | 0 |
| TR148455|c0_g3|m.49385 | Spinacia oleracea | Stearoyl-acyl carrier protein desaturase | sadA | 659.7 |  |  |  |  | 102.42 |  | 0 | 0 | 0 | 1 | 1 | 0 | 0 | 0 |
| TR148521|c0_g2|m.13815 | Ricinus communis | Phosphoribosylformylglycinamidine synthase, putative | RCOM_1480330 | 1829.1 | 85.102 | 58.482 | 23.258 | 28.952 | 21.902 | 30.04 | 0 | -1 | 0 | 0 | 0 | 0 | 0 | 0 |
| TR148485|c1_g5|m.39487 | Ricinus communis | Nucleic acid binding protein, putative | RCOM_1492510 | 1948.4 | 80.515 | 75.1 | 77.175 | 56.083 |  |  | 0 | -1 | 0 | -1 | -1 | 0 | 0 | 0 |
| TR148497|c0_g3|m.37760 | Populus trichocarpa | Predicted protein | POPTRDRAFT_550223 | 902.74 |  | 20.232 |  |  | 125.18 | 71.486 | 0 | 0 | -1 | 0 | 1 | 0 | 0 | 0 |
| TR148510|c0_g1|m.37982 | Vitis vinifera | Putative uncharacterized protein | VIT_18s0001g00060 | 1063.5 | 18.633 | 15.451 | 59.744 | 32.801 |  |  | 0 | 0 | 0 | -1 | -1 | 0 | 0 | 0 |
| TR148518|c1_g1|m.48069 | Ricinus communis | Inter-alpha-trypsin inhibitor heavy chain H3, putative | RCOM_1711500 | 1921 |  | 74.548 |  |  |  |  | 0 | 0 | -1 | -1 | 0 | 0 | 0 | 0 |
| TR148518|c1_g3|m.41760 | Ricinus communis | Inter-alpha-trypsin inhibitor heavy chain H3, putative | RCOM_1711500 | 355850 | 3578.1 | 4153.7 | 4443.5 | 3854.5 | 9831.6 | 7793.9 | 1 | 1 | 0 | 1 | 1 | 0 | 1 | 1 |
| TR164451|c0_g1|m.58695 | Manihot esculenta | Neutral/alkaline invertase | MNINV3 | 538.03 |  |  | 16.234 |  | 31.659 | 55.701 | 1 | 1 | 1 | 1 | 0 | 0 | 0 | 0 |
| TR148772|c0_g4|m.12649 | Vitis vinifera | Putative uncharacterized protein | VIT_14s0108g00590 | 2421.7 |  |  |  |  | 334.57 |  | 0 | 0 | 0 | 1 | 1 | 0 | 0 | 0 |
| TR148784|c1_g8|m.15251 | Ricinus communis | Putative uncharacterized protein | RCOM_1711490 | 61147 | 571.01 | 559.47 | 1416.5 | 894.97 | 1108.8 | 1331.7 | 1 | 1 | 0 | 1 | 0 | 0 | 1 | 0 |
| TR148792|c2_g18|m.44105 | Ricinus communis | Carbonyl reductase, putative | RCOM_1614540 | 1019.3 |  |  |  |  |  |  | 0 | 0 | 0 | 0 | 0 | 0 | 0 | 0 |
| TR148792|c2_g6|m.6337 | Glycine max | Uncharacterized protein | Gma.2640 | 90771 | 880.59 | 1680.4 | 957.64 | 571.44 | 2358.9 | 2403 | 0 | 0 | 0 | 0 | 1 | 0 | 0 | 1 |
| TR148803|c1_g6|m.40945 | Vitis vinifera | Putative uncharacterized protein | VITISV_043447 | 1312.7 |  |  |  |  |  | 65.718 | 0 | 0 | 0 | 1 | 1 | 0 | 0 | 0 |
| TR148806|c1_g3|m.59859 | Vitis vinifera | Putative uncharacterized protein | VIT_13s0147g00110 | 30649 | 129.63 | 485.61 | 444.43 | 376.98 | 501.83 | 280 | 0 | 0 | 0 | 0 | 0 | 0 | 0 | 0 |
| TR148818|c0_g3|m.41481 | Populus trichocarpa | Predicted protein | POPTRDRAFT_731296 | 12172 | 233.38 | 298.6 | 137.86 | 89.557 | 476.11 | 516.45 | 0 | 0 | 0 | 1 | 1 | 0 | 1 | 1 |
| TR148829|c0_g2|m.40727 | Populus trichocarpa | Predicted protein | POPTRDRAFT_915400 | 1025 | 19.589 |  | 58.549 |  |  |  | 0 | 0 | 0 | -1 | -1 | 0 | 0 | 0 |
| TR148847|c0_g3|m.62887 | Vitis vinifera | Putative uncharacterized protein | VIT_12s0057g00880 | 3249.6 |  |  |  | 88.892 |  |  | 0 | 0 | 1 | 0 | -1 | 0 | 0 | 0 |
| TR148850|c0_g3|m.58007 | Vitis vinifera | Putative uncharacterized protein | VIT_05s0094g00460 | 1185.5 |  |  |  |  | 139.31 |  | 0 | 0 | 0 | 1 | 1 | 0 | 0 | 0 |
| TR149020|c0_g2|m.16621 | Vitis vinifera | Putative uncharacterized protein | VIT_06s0004g03700 | 852.92 | 8.4354 |  | 38.885 | 16.006 | 17.019 | 64.527 | 1 | 1 | 0 | 0 | 0 | 0 | 0 | 0 |
| TR149021|c0_g6|m.26034 | Silene latifolia | Putative uncharacterized protein (Fragment) |  | 10679 |  | 216.69 |  | 63.714 |  |  | 0 | -1 | 0 | -1 | -1 | 0 | 0 | 0 |
| TR149033|c0_g3|m.16439 | Vitis vinifera | Putative uncharacterized protein | VIT_04s0008g01430 | 588.94 |  |  | 16.993 | 26.029 |  | 21.726 | 1 | 1 | 1 | 1 | 0 | 0 | 0 | 0 |
| TR149039|c0_g3|m.59360 | Vitis vinifera | Putative uncharacterized protein | VIT_08s0007g05260 | 7437.8 | 177.55 | 223.26 | 85.404 | 46.177 | 358.6 | 82.08 | 0 | 0 | -1 | 0 | 0 | -1 | 0 | 0 |
| TR149039|c1_g2|m.47068 | Vitis vinifera | Putative uncharacterized protein | VIT_08s0007g05260 | 4770.9 | 262.08 | 227.61 | 118.73 |  | 171.33 |  | 0 | 0 | 0 | 0 | 0 | 0 | 0 | 0 |
| TR149043|c2_g6|m.37868 | Vitis vinifera | Putative uncharacterized protein | VIT_03s0038g04040 | 32303 | 540.18 | 540.69 | 122.06 |  | 903.91 | 525.12 | 0 | 0 | -1 | 0 | 0 | -1 | 0 | 0 |
| TR149046|c0_g4|m.20312 | Vitis vinifera | Putative uncharacterized protein | VIT_07s0005g01650 | 669.61 |  | 5.5088 |  | 7.1524 |  | 3.1599 | 0 | 0 | 0 | 0 | 0 | 0 | 0 | 0 |
| TR149055|c0_g1|m.10872 | Vitis vinifera | Putative uncharacterized protein | VIT_01s0127g00060 | 88050 | 887.47 | 1160.1 | 543.68 | 551.27 | 1864.6 | 1543.8 | 0 | 0 | 0 | 0 | 1 | 0 | 0 | 1 |
| TR149068|c1_g5|m.39102 | Ricinus communis | Scythe/bat3, putative | RCOM_1600180 | 2275.4 |  | 141.37 | 79.701 | 32.695 | 54.607 | 42.559 | 0 | -1 | 0 | 0 | 0 | 0 | 0 | 0 |
| TR149083|c0_g1|m.17341 | Vitis vinifera | Putative uncharacterized protein | VIT_06s0009g00770 | 1363.4 |  |  | 2.3837 | 9.1249 | 16.664 | 21.897 | 1 | 1 | 1 | 1 | 0 | 0 | 0 | 0 |
| TR149756|c0_g1|m.30416 | Populus trichocarpa | Predicted protein | POPTRDRAFT_815032 | 24711 | 519.2 | 922.6 | 262.75 | 221.35 | 328.85 | 269.22 | 0 | 0 | 0 | 0 | 0 | 0 | 0 | 0 |
| TR149756|c0_g4|m.40041 | Populus trichocarpa | Putative uncharacterized protein |  | 969.98 | 8.5104 | 8.9093 |  |  |  |  | 0 | 0 | -1 | -1 | 0 | 0 | 0 | 0 |
| TR149757|c0_g1|m.37439 | Glycine max | Uncharacterized protein | Gma.27704 | 9789.7 | 6.986 | 21.807 | 275.23 | 313.81 | 474.28 | 32.31 | 0 | 0 | 1 | 0 | 0 | 1 | 0 | 0 |
| TR149772|c0_g7|m.47356 | Vitis vinifera | Putative uncharacterized protein | VIT_04s0008g03800 | 11202 |  |  |  |  |  |  | 0 | 0 | 0 | 0 | 0 | 0 | 0 | 0 |
| TR149783|c0_g1|m.7381 | Mesembryanthemum crystallinum | Protein phosphatase-2C | PP2C | 18385 |  |  |  | 45.082 |  |  | 0 | 0 | 1 | 0 | -1 | 0 | 0 | 0 |
| TR44672|c0_g1|m.37476 | Medicago truncatula | Anthocyanin 5-aromatic acyltransferase | MaT5 | 2249 |  |  |  |  |  |  | 0 | 0 | 0 | 0 | 0 | 0 | 0 | 0 |
| TR149811|c1_g1|m.4291 | Spinacia oleracea | Cysteine synthase | CSase B | 462.56 |  |  |  |  |  |  | 0 | 0 | 0 | 0 | 0 | 0 | 0 | 0 |
| TR149818|c0_g1|m.16722 | Medicago truncatula | Alpha-L-arabinofuranosidase | Araf1 | 11438 | 149.62 | 64.638 | 282.84 | 412.95 | 35.361 |  | 0 | 0 | 0 | 0 | 0 | 0 | 0 | 0 |
| TR93632|c0_g1|m.23027 | Ricinus communis | Anthranilate phosphoribosyltransferase, putative | RCOM_0024530 | 488.69 |  |  |  | 15.877 |  | 31.672 | 1 | 1 | 1 | 1 | 0 | 0 | 0 | 0 |
| TR149825|c1_g1|m.22208 | Populus trichocarpa | Predicted protein | POPTRDRAFT_805077 | 421.25 | 17.336 | 17.172 | 8.7925 | 18.151 |  |  | 0 | -1 | 0 | -1 | -1 | 0 | 0 | 0 |
| TR149837|c1_g3|m.5726 | Glycine max | Uncharacterized protein | Gma.19449 | 8965.8 |  |  |  |  | 293.02 |  | 0 | 0 | 0 | 1 | 1 | 0 | 0 | 0 |
| TR149840|c1_g1|m.351 | Populus trichocarpa | Predicted protein | POPTRDRAFT_816895 | 64783 | 956.72 | 1145.3 | 200.88 | 454.24 | 1420.1 | 1195.9 | 0 | 0 | -1 | 0 | 1 | -1 | 0 | 1 |
| TR149850|c0_g4|m.29791 | Vitis vinifera | Putative uncharacterized protein | VIT_17s0000g00340 | 43366 | 214.77 | 359.13 | 359.65 | 291.23 | 1027.5 | 1019 | 1 | 1 | 0 | 1 | 1 | 0 | 1 | 1 |
| TR149850|c0_g6|m.5252 | Cucumis melo | ATP-dependent clp protease |  | 6907.3 | 28.466 |  |  |  |  |  | 0 | 0 | -1 | -1 | 0 | 0 | 0 | 0 |
| TR15928|c0_g1|m.18548 | Prunus dulcis | 60S acidic ribosomal protein | AL60SRP | 3303.8 |  |  |  | 177.51 |  | 228.49 | 1 | 1 | 1 | 1 | 0 | 0 | 0 | 0 |
| TR99657|c0_g1|m.25629 | Vitis vinifera | Putative uncharacterized protein | VIT_02s0025g02890 | 4147.8 | 72.027 | 82.817 |  |  | 219.34 | 79.398 | 0 | 0 | -1 | 0 | 1 | 0 | 0 | 0 |
| TR149934|c1_g2|m.17463 | Populus trichocarpa | Predicted protein | POPTRDRAFT_820612 | 1364.8 | 54.594 | 31.584 | 14.476 | 13.65 | 35.944 |  | 0 | 0 | 0 | 0 | 1 | 0 | 0 | 1 |
| TR149968|c2_g3|m.54826 | Vitis vinifera | Putative uncharacterized protein | VIT_08s0007g02760 | 815.29 |  |  |  |  |  |  | 0 | 0 | 0 | 0 | 0 | 0 | 0 | 0 |
| TR149970|c0_g7|m.44451 | Populus trichocarpa | Predicted protein | POPTRDRAFT_662670 | 3047.3 |  |  | 167.61 |  |  |  | 0 | 0 | 1 | 0 | -1 | 0 | 0 | 0 |
| TR149993|c1_g8|m.28141 | Mesembryanthemum crystallinum | Glutamine synthetase (Fragment) |  | 96527 | 1283.2 | 1772.6 | 340.12 | 413.53 | 1220.3 | 347.6 | 0 | 0 | -1 | 0 | 0 | -1 | 0 | 0 |
| TR150001|c0_g5|m.38336 | Medicago truncatula | Uncharacterized protein |  | 324640 | 4172.8 | 5766.5 | 5526.7 | 5923.5 | 6364.5 | 5187.8 | 1 | 1 | 0 | 0 | 0 | 0 | 0 | 0 |
| TR150008|c0_g2|m.44270 | Populus trichocarpa | Predicted protein | POPTRDRAFT_660167 | 1922.6 | 24.3 | 36.81 | 72.518 | 29.508 | 159.65 | 101.7 | 1 | 1 | 0 | 0 | 0 | 0 | 0 | 0 |
| TR150008|c0_g3|m.58612 | Vitis vinifera | Putative uncharacterized protein | VIT_13s0106g00790 | 1304.1 |  | 53.696 | 21.02 | 31.979 | 59.013 |  | 0 | 0 | 0 | 0 | 0 | 0 | 0 | 0 |
| TR150018|c0_g2|m.36886 | Vitis vinifera | Thioredoxin reductase | VIT_04s0044g01750 | 15420 | 61.445 | 139.68 | 61.881 | 70.581 |  |  | 0 | -1 | 0 | -1 | -1 | 0 | 0 | 0 |
| TR150021|c0_g1|m.55381 | Vitis vinifera | Putative uncharacterized protein | VIT_00s0211g00120 | 54367 | 391.83 | 335.75 | 119.93 | 108.16 | 2213.3 | 1725.5 | 0 | 0 | -1 | 1 | 1 | -1 | 1 | 1 |
| TR150021|c0_g2|m.35671 | Medicago truncatula | Serine hydroxymethyltransferase | MTR_5g030950 | 24048 | 241.59 | 193.59 | 331.92 | 400.45 | 340.66 | 272.78 | 0 | 0 | 0 | 0 | 0 | 0 | 0 | 0 |
| TR150032|c0_g3|m.7814 | Vitis vinifera | Putative uncharacterized protein | VIT_17s0000g07330 | 56616 | 925.88 | 983.5 | 803.18 | 129.57 | 1306.4 | 1165.2 | 0 | 0 | 0 | 0 | 0 | 0 | 0 | 0 |
| TR150032|c0_g4|m.16779 | Populus trichocarpa | Putative uncharacterized protein |  | 2732.6 |  |  | 233.82 | 253.17 |  |  | 0 | 0 | 1 | 0 | -1 | 0 | 0 | 0 |
| TR159733|c1_g4|m.3506 | Ricinus communis | HIRA-interacting protein, putative | RCOM_1086350 | 642.08 | 48.102 |  |  |  |  |  | 0 | 0 | -1 | -1 | 0 | 0 | 0 | 0 |
| TR150067|c1_g3|m.30642 | Glycine max | Uncharacterized protein | Gma.18068 | 4524.5 | 90.942 | 47.732 |  |  | 120.64 | 345.32 | 0 | 0 | -1 | 0 | 1 | 0 | 0 | 0 |
| TR95551|c0_g1|m.43981 | Vitis vinifera | Putative uncharacterized protein | VIT_03s0038g04080 | 516.01 |  |  |  |  | 104.83 |  | 0 | 0 | 0 | 1 | 1 | 0 | 0 | 0 |
| TR150093|c0_g1|m.27261 | Ricinus communis | Signal recognition particle protein, putative | RCOM_0292970 | 14099 | 459.29 | 385.3 | 99.977 | 37.377 | 316.32 | 502.14 | 0 | 0 | -1 | 0 | 0 | -1 | 0 | 0 |
| TR150116|c1_g2|m.31319 | Medicago truncatula | Purple acid phosphatase | MTR_7g104330 | 746.68 | 51.712 | 31.204 |  |  | 38.105 |  | 0 | 0 | -1 | 0 | 1 | 0 | 0 | 0 |
| TR15017|c0_g3|m.44175 | Zea mays | Putative alanine aminotransferase | C9009 | 3333.8 | 91.546 | 92.802 | 89.198 |  | 367.41 |  | 0 | 0 | 0 | 1 | 0 | 0 | 1 | 0 |
| TR15020|c0_g2|m.3343 | Ricinus communis | Imidazole glycerol phosphate synthase subunit hisF | RCOM_1303610 | 2415.7 | 16.725 |  |  | 7.3702 | 100.63 | 103.21 | 0 | 0 | 0 | 1 | 1 | 0 | 1 | 1 |
| TR99550|c0_g2|m.20026 | Vitis vinifera | Putative uncharacterized protein | VIT_11s0016g00600 | 458.03 |  |  | 20.093 |  |  |  | 0 | 0 | 1 | 0 | -1 | 0 | 0 | 0 |
| TR150280|c1_g1|m.44199 | Vitis vinifera | (3S)-linalool/(E)-nerolidol synthase |  | 29832 |  |  | 37.775 | 37.243 | 1254.9 | 1095.4 | 1 | 1 | 1 | 1 | 1 | 0 | 0 | 1 |
| TR152231|c0_g1|m.39064 | Glycine max | Uncharacterized protein |  | 9763.8 | 98.032 | 50.126 | 103.45 | 46.636 | 210.41 | 139.63 | 0 | 0 | 0 | 0 | 0 | 0 | 0 | 0 |
| TR150291|c1_g6|m.50459 | Vitis vinifera | Putative uncharacterized protein | VIT_01s0026g01720 | 3855.2 |  | 108.02 |  |  |  | 116.39 | 0 | 0 | -1 | 0 | 1 | 0 | 0 | 0 |
| TR150292|c0_g5|m.26803 | Glycine max | Adenylosuccinate synthetase 2 | Gma.20675 | 7387.3 | 36.956 |  | 98.521 | 87.747 | 96.168 | 114.7 | 1 | 1 | 0 | 0 | 0 | 0 | 0 | 0 |
| TR47177|c0_g2|m.26634 | Ricinus communis | Putative uncharacterized protein | RCOM_1469500 | 2920.3 |  | 22.887 |  |  |  | 514.62 | 0 | 0 | -1 | 0 | 1 | 0 | 0 | 0 |
| TR150325|c0_g1|m.17849 | Glycine max | Uncharacterized protein | Gma.45784 | 124.77 |  |  |  |  |  |  | 0 | 0 | 0 | 0 | 0 | 0 | 0 | 0 |
| TR150331|c0_g4|m.32499 | Glycine max | Uncharacterized protein | Gma.55835 | 6234.4 | 82.619 |  | 32.562 | 18.636 |  |  | 0 | -1 | 0 | -1 | -1 | 0 | 0 | 0 |
| TR150331|c0_g4|m.32500 | Glycine max | Uncharacterized protein | Gma.18478 | 4296.7 |  |  | 8.0868 | 14.893 | 391.29 | 327.25 | 1 | 1 | 1 | 1 | 1 | 0 | 0 | 1 |
| TR150334|c0_g2|m.10272 | Populus trichocarpa | Predicted protein | POPTRDRAFT_828859 | 176870 | 2049.6 | 2344.1 | 1200.6 | 751.07 | 4315.4 | 4027.1 | 0 | 0 | -1 | 1 | 1 | -1 | 1 | 1 |
| TR150334|c0_g4|m.38086 | Ricinus communis | Catalytic, putative | RCOM_0291690 | 42856 | 597.82 | 1188.7 | 696.95 | 580.72 | 733.22 | 777.15 | 0 | 0 | 0 | 0 | 0 | 0 | 0 | 0 |
| TR150341|c0_g3|m.19478 | Populus trichocarpa | Predicted protein | POPTRDRAFT_1089460 | 12568 |  |  |  |  |  |  | 0 | 0 | 0 | 0 | 0 | 0 | 0 | 0 |
| TR150344|c0_g2|m.61255 | Ricinus communis | Alpha-N-arabinofuranosidase 1, putative | RCOM_1271670 | 13522 | 151.44 | 195.81 | 108.72 | 92.605 | 276.18 | 283.42 | 0 | 0 | 0 | 1 | 1 | 0 | 1 | 1 |
| TR150345|c3_g1|m.12946 | Vitis vinifera | Putative uncharacterized protein | VITISV_035079 | 2336.6 |  | 60.134 | 146.42 | 100.84 |  |  | 0 | 0 | 0 | -1 | -1 | 0 | 0 | 0 |
| TR150353|c1_g2|m.19743 | Arabidopsis lyrata | Putative uncharacterized protein | ARALYDRAFT_895494 | 1964.4 | 124.73 | 107.97 | 120.54 | 63.031 |  |  | 0 | -1 | 0 | -1 | -1 | 0 | 0 | 0 |
| TR150362|c0_g1|m.2031 | Populus trichocarpa | Predicted protein | POPTRDRAFT_558193 | 11002 | 132.19 | 265.11 | 399.23 | 527.83 | 53.855 | 330.87 | 0 | 0 | 0 | 0 | 0 | 0 | 0 | 0 |
| TR150362|c0_g2|m.40957 | Amblyomma maculatum | Putative uncharacterized protein |  | 2909.9 |  | 129.99 | 31.731 |  |  |  | 0 | -1 | 0 | -1 | -1 | 0 | 0 | 0 |
| TR153442|c0_g1|m.28464 | Ricinus communis | Kinesin light chain, putative | RCOM_1312260 | 254.85 |  |  |  |  |  |  | 0 | 0 | 0 | 0 | 0 | 0 | 0 | 0 |
| TR150373|c1_g1|m.56343 | Vitis vinifera | Putative uncharacterized protein | VIT_10s0116g00390 | 6639.4 |  | 34.676 | 42.396 | 58.413 | 695.65 | 355.01 | 1 | 1 | 0 | 0 | 0 | 0 | 0 | 0 |
| TR98846|c0_g5|m.38428 | Vitis vinifera | Putative uncharacterized protein | VIT_10s0116g00390 | 6553 |  |  |  |  | 411.39 | 301.23 | 0 | 0 | 0 | 1 | 1 | 0 | 0 | 0 |
| TR150387|c2_g5|m.38141 | Vitis vinifera | Putative uncharacterized protein | VIT_18s0001g03230 | 2192.6 |  | 69.187 | 46.055 | 39.692 | 135 | 86.583 | 0 | 0 | 0 | 0 | 0 | 0 | 0 | 0 |
| TR150405|c1_g1|m.62557 | Vitis vinifera | Putative uncharacterized protein | VIT_14s0030g00030 | 4540.9 | 54.272 | 53.55 | 53.626 | 8.874 | 222.85 | 158.59 | 0 | 0 | 0 | 0 | 0 | 0 | 0 | 0 |
| TR150411|c0_g4|m.29225 | Vitis vinifera | Putative uncharacterized protein | VIT_11s0016g01070 | 71.564 |  |  |  |  |  |  | 0 | 0 | 0 | 0 | 0 | 0 | 0 | 0 |
| TR150451|c0_g4|m.22056 | Vitis vinifera | Putative uncharacterized protein | VIT_00s0515g00010 | 277.82 |  |  |  |  |  |  | 0 | 0 | 0 | 0 | 0 | 0 | 0 | 0 |
| TR150462|c0_g1|m.36609 | Populus trichocarpa | Predicted protein | POPTRDRAFT_1082701 | 1791.9 |  |  | 6.5497 |  |  |  | 0 | 0 | 1 | 0 | -1 | 0 | 0 | 0 |
| TR30359|c0_g3|m.50073 | Ricinus communis | NADH dehydrogenase, putative | RCOM_1581930 | 80806 | 1108.8 | 1125.4 | 407.87 | 324.29 | 2240.7 | 2229.4 | 0 | 0 | -1 | 1 | 1 | -1 | 1 | 1 |
| TR15064|c0_g1|m.47204 | Zea mays | Uncharacterized protein |  | 7010 | 82.833 | 109.18 | 112.63 | 49.035 |  |  | 0 | -1 | 0 | -1 | -1 | 0 | 0 | 0 |
| TR84771|c0_g1|m.41085 | Populus trichocarpa | Porin/voltage-dependent anion-selective channel protein | POPTRDRAFT_580465 | 4695.1 | 191.16 | 270.98 |  |  |  |  | 0 | 0 | -1 | -1 | 0 | 0 | 0 | 0 |
| TR150818|c0_g4|m.51758 | Ricinus communis | Heat-shock protein, putative | RCOM_0706490 | 931.87 |  |  |  |  |  |  | 0 | 0 | 0 | 0 | 0 | 0 | 0 | 0 |
| TR97398|c0_g1|m.46623 | Vitis vinifera | Putative uncharacterized protein | VIT_13s0067g02450 | 1880.3 | 26.01 | 27.837 | 23.553 |  | 56.587 | 32.749 | 0 | 0 | 0 | 0 | 0 | 0 | 0 | 0 |
| TR85470|c0_g1|m.29188 | Vitis vinifera | Putative uncharacterized protein | VIT_02s0025g03620 | 13439 | 84.767 | 31.588 | 155.65 | 77.891 | 278.5 | 309.04 | 1 | 1 | 0 | 1 | 0 | 0 | 1 | 0 |
| TR150844|c0_g3|m.62086 | Vitis vinifera | Putative uncharacterized protein | VIT_07s0104g01470 | 2874 |  |  |  |  |  |  | 0 | 0 | 0 | 0 | 0 | 0 | 0 | 0 |
| TR150849|c0_g2|m.45682 | Medicago truncatula | UDP-glucose 4-epimerase | MTR_5g009170 | 188.53 |  |  | 64.405 | 38.086 |  |  | 0 | 0 | 1 | 0 | -1 | 0 | 0 | 0 |
| TR150852|c1_g8|m.6405 | Populus trichocarpa | Predicted protein | POPTRDRAFT_558191 | 7044.6 |  | 19.419 | 87.537 |  |  | 485.68 | 1 | 1 | 0 | 0 | 0 | 0 | 0 | 0 |
| TR164652|c0_g1|m.52372 | Spinacia oleracea | Protoporphyrinogen oxidase (Protox-I) | SO-POX1 | 3821 |  |  | 49.815 | 8.8001 | 247.92 |  | 1 | 1 | 1 | 1 | 0 | 0 | 0 | 0 |
| TR150860|c0_g3|m.61529 | Vitis vinifera | Putative uncharacterized protein | VIT_14s0066g01200 | 617.3 |  | 34.369 | 70.687 | 77.423 |  | 85.116 | 1 | 1 | 0 | 0 | 0 | 0 | 0 | 0 |
| TR151074|c0_g2|m.45779 | Populus trichocarpa | Lon protease homolog | POPTRDRAFT_894071 | 167.86 |  |  |  |  |  |  | 0 | 0 | 0 | 0 | 0 | 0 | 0 | 0 |
| TR152771|c0_g1|m.36346 | Ricinus communis | Transcription factor, putative | RCOM_1203530 | 889.47 |  |  |  |  |  |  | 0 | 0 | 0 | 0 | 0 | 0 | 0 | 0 |
| TR98559|c0_g2|m.12349 | Vitis vinifera | Putative uncharacterized protein | VIT_00s0317g00100 | 1665.2 | 18.586 | 14.1 | 39.256 | 11.25 | 43.892 | 40.78 | 1 | 1 | 0 | 1 | 0 | 0 | 1 | 0 |
| TR151103|c0_g1|m.53916 | Vitis vinifera | Putative uncharacterized protein | VIT_07s0104g01480 | 680.34 |  |  |  |  | 64.136 |  | 0 | 0 | 0 | 1 | 1 | 0 | 0 | 0 |
| TR151104|c0_g2|m.27839 | Ricinus communis | Thioredoxin f-type, putative | RCOM_1077810 | 11719 | 375.68 | 256.11 | 58.724 | 39.692 | 195.86 | 164.62 | 0 | 0 | -1 | 0 | 1 | -1 | 0 | 1 |
| TR151108|c0_g1|m.6069 | Vitis vinifera | Putative uncharacterized protein | VIT_11s0016g05750 | 908.86 | 19.493 |  | 8.3322 |  | 18.252 | 41.673 | 0 | 0 | 0 | 0 | 0 | 0 | 0 | 0 |
| TR151111|c0_g10|m.30314 | Ricinus communis | 3-hydroxyacyl-CoA dehyrogenase, putative | RCOM_1052220 | 5206 |  | 78.047 |  | 2.7426 | 160.98 | 174.81 | 0 | 0 | 0 | 0 | 1 | 0 | 0 | 1 |
| TR151126|c1_g11|m.17151 | Populus trichocarpa | Predicted protein | POPTRDRAFT_825852 | 6707.5 |  | 21.936 |  | 7.559 | 192.45 | 226.97 | 0 | 0 | 0 | 0 | 0 | 0 | 0 | 0 |
| TR151131|c0_g3|m.38461 | Vitis vinifera | Phosphorylase | VIT_06s0004g06020 | 46655 | 416.83 | 447.43 | 544.03 | 537.09 | 537.13 | 821.18 | 1 | 1 | 0 | 0 | 0 | 0 | 0 | 0 |
| TR151133|c2_g4|m.46419 | Vitis vinifera | Putative uncharacterized protein | VIT_01s0010g00680 | 128230 | 1128 | 1502.4 | 643.51 | 423.36 | 3386.8 | 2744 | 0 | 0 | 0 | 1 | 1 | 0 | 1 | 1 |
| TR151137|c0_g3|m.813 | Glycine max | Uncharacterized protein |  | 5120.8 | 79.585 | 12.229 | 60.484 | 38.472 | 164.76 |  | 1 | 1 | 0 | 0 | 0 | 0 | 0 | 0 |
| TR85703|c0_g1|m.7312 | Silene latifolia | Heat shock protein (Fragment) |  | 23581 | 228.23 | 226.66 | 410.97 | 182.75 | 227.2 | 334.01 | 1 | 1 | 0 | 0 | 0 | 0 | 0 | 0 |
| TR151138|c2_g1|m.16396 | Populus trichocarpa | Predicted protein | POPTRDRAFT_869058 | 3231.5 |  |  |  |  |  | 462.68 | 0 | 0 | 0 | 1 | 1 | 0 | 0 | 0 |
| TR151150|c0_g4|m.50231 | Vitis vinifera | Putative uncharacterized protein | VIT_01s0011g05730 | 412.14 |  | 5.1469 |  |  | 30.018 |  | 0 | 0 | -1 | 0 | 1 | 0 | 0 | 0 |
| TR151817|c1_g3|m.62126 | Populus trichocarpa | Predicted protein | POPTRDRAFT_1111495 | 24168 | 402.54 | 445.25 | 508.98 | 557.03 | 96.923 | 95.721 | 0 | 0 | 0 | -1 | -1 | 0 | -1 | -1 |
| TR99504|c0_g1|m.50861 | Glycine max | Uncharacterized protein | Gma.57259 | 3900.4 | 37.568 | 19.871 | 44.656 | 13.871 | 37.671 | 68.81 | 0 | 0 | 0 | 0 | 0 | 0 | 0 | 0 |
| TR151841|c1_g2|m.57060 | Glycine max | Uncharacterized protein | Gma.55815 | 19614 |  |  |  | 85.205 | 246.18 | 2468.5 | 1 | 1 | 1 | 1 | 0 | 0 | 0 | 0 |
| TR151849|c1_g3|m.48644 | Vitis vinifera | Putative uncharacterized protein | VIT_10s0003g02050 | 15033 | 252.41 | 313.24 |  |  |  | 1690.8 | 0 | 0 | -1 | 1 | 1 | 0 | 1 | 0 |
| TR151851|c0_g2|m.21550 | Ricinus communis | Dynamin, putative | RCOM_0449340 | 997.45 | 24.731 | 65.999 |  |  | 144.05 |  | 0 | 0 | -1 | 0 | 1 | 0 | 0 | 0 |
| TR162630|c0_g2|m.12461 | Sorghum bicolor | Putative uncharacterized protein Sb01g045460 | Sb01g045460 | 13485 | 302.03 | 352.86 | 187.57 | 170.04 | 73.643 |  | 0 | -1 | -1 | 0 | 0 | -1 | 0 | 0 |
| TR49728|c1_g1|m.20425 | Solanum lycopersicum | Hop-interacting protein THI113 |  | 16434 | 707.7 | 625.19 | 566.23 | 464.37 |  |  | 0 | -1 | 0 | -1 | -1 | 0 | 0 | 0 |
| TR151876|c1_g6|m.61670 | Populus trichocarpa | Predicted protein | POPTRDRAFT_710069 | 61935 | 1369.6 | 1411.9 | 658.62 | 672.8 | 1054.3 | 671.38 | 0 | 0 | -1 | 0 | 0 | -1 | 0 | 0 |
| TR151885|c0_g2|m.18348 | Populus trichocarpa | Predicted protein | POPTRDRAFT_647716 | 4812.9 | 33.218 |  | 116.87 | 35.586 | 106.21 |  | 1 | 1 | 0 | 0 | 0 | 0 | 0 | 0 |
| TR151891|c0_g1|m.61225 | Vitis vinifera | Putative uncharacterized protein | VIT_01s0011g00470 | 1780.1 |  |  |  | 42.282 |  |  | 0 | 0 | 1 | 0 | -1 | 0 | 0 | 0 |
| TR151896|c0_g5|m.56297 | Vernicia fordii | NADH:cytochrome b5 reductase | CBR1A | 3713.6 |  |  | 100.78 |  | 336.12 | 178.72 | 1 | 1 | 1 | 1 | 0 | 0 | 0 | 0 |
| TR151899|c1_g1|m.43979 | Vitis vinifera | Putative uncharacterized protein | VITISV_007543 | 126.58 |  |  | 3.0653 | 3.8737 |  |  | 0 | 0 | 1 | 0 | -1 | 0 | 0 | 0 |
| TR151900|c1_g1|m.57489 | Ricinus communis | Malic enzyme | RCOM_0658870 | 84816 | 1266.1 | 1425.7 | 979.79 | 973.95 | 1558.1 | 788.41 | 0 | 0 | 0 | 0 | 0 | 0 | 0 | 0 |
| TR85472|c0_g1|m.30855 | Vitis vinifera | Putative uncharacterized protein | VIT_12s0057g01240 | 4499.7 | 61.44 | 145.98 | 69.633 | 30.539 | 137.55 | 175.25 | 0 | 0 | 0 | 0 | 0 | 0 | 0 | 0 |
| TR86565|c0_g1|m.58084 | Populus trichocarpa | Predicted protein | POPTRDRAFT_589960 | 7551.3 | 59.354 | 74.456 |  | 32.513 |  | 98.4 | 0 | 0 | 0 | 0 | 0 | 0 | 0 | 0 |
| TR152172|c0_g1|m.44162 | Medicago truncatula | Putative uncharacterized protein | MTR_7g011890 | 1512.8 | 33.981 |  | 28.326 |  |  |  | 0 | -1 | 0 | -1 | -1 | 0 | 0 | 0 |
| TR81428|c0_g3|m.18694 | Vitis vinifera | Proteasome subunit beta type | VIT_06s0004g03190 | 135040 | 1772 | 1477.9 | 591.95 | 442.36 | 4614.4 | 2912.8 | 0 | 0 | -1 | 0 | 0 | -1 | 0 | 0 |
| TR152185|c0_g1|m.57482 | Vitis vinifera | Putative uncharacterized protein | VIT_18s0122g00680 | 3087.5 |  |  |  | 51.409 |  |  | 0 | 0 | 1 | 0 | -1 | 0 | 0 | 0 |
| TR152193|c0_g1|m.967 | Ricinus communis | Nuclear import protein mog1, putative | RCOM_0487940 | 1150.3 |  |  |  |  |  | 153.46 | 0 | 0 | 0 | 1 | 1 | 0 | 0 | 0 |
| TR152196|c0_g6|m.63132 | Gossypium hirsutum | Somatic embryogenesis receptor-like kinase 3 protein | serk3 | 8446.6 | 159.2 |  | 177.63 | 148.64 |  |  | 0 | 0 | 0 | -1 | -1 | 0 | 0 | 0 |
| TR152208|c0_g1|m.6620 | Dimocarpus longan | Class I chitinase | ChiI | 2677.8 |  |  |  | 68.556 |  |  | 0 | 0 | 1 | 0 | -1 | 0 | 0 | 0 |
| TR7357|c0_g4|m.55658 | Silene latifolia | Oligomycin sensitivity conferring protein | DD44X | 49397 | 262.57 | 224.68 | 62.566 | 69.602 | 1338.3 | 1735 | 0 | 0 | -1 | 1 | 1 | -1 | 1 | 1 |
| TR152212|c0_g8|m.4874 | Vitis vinifera | Putative uncharacterized protein | VIT_05s0051g00720 | 8766.5 | 76.877 |  |  | 29.502 | 215.77 | 92.166 | 0 | 0 | 0 | 0 | 0 | 0 | 0 | 0 |
| TR152224|c0_g5|m.20572 | Solanum lycopersicum | Allene oxide synthase | aos | 913.34 |  |  |  |  |  |  | 0 | 0 | 0 | 0 | 0 | 0 | 0 | 0 |
| TR152228|c1_g2|m.53695 | Ricinus communis | 60S ribosomal protein L3, putative | RCOM_0959710 | 1802.2 |  |  | 69.232 |  |  |  | 0 | 0 | 1 | 0 | -1 | 0 | 0 | 0 |
| TR152228|c1_g3|m.53871 | Hevea brasiliensis | 60S ribosomal protein L3B | RPL3B | 54950 | 347.7 | 249.13 | 667.66 | 540.4 | 1854.8 | 2131.1 | 1 | 1 | 0 | 1 | 1 | 0 | 1 | 1 |
| TR152229|c0_g3|m.35293 | Medicago truncatula | 60S ribosomal protein L13 |  | 12696 | 89.099 | 97.882 |  | 107.41 |  | 113.46 | 1 | 1 | 0 | 0 | 0 | 0 | 0 | 0 |
| TR56109|c0_g1|m.26551 | Populus trichocarpa | Putative uncharacterized protein |  | 331.73 |  |  |  |  |  |  | 0 | 0 | 0 | 0 | 0 | 0 | 0 | 0 |
| TR152264|c0_g3|m.23503 | Vitis vinifera | Putative uncharacterized protein | VIT_13s0067g00210 | 4933 | 35.558 |  | 68.98 | 104.58 |  | 170.91 | 1 | 1 | 0 | 0 | 0 | 0 | 0 | 0 |
| TR152269|c0_g1|m.3253 | Solanum tuberosum | Glucose-6-phosphate isomerase | GPI | 202810 | 2034.4 | 2307.3 | 1293.7 | 1111.4 | 5754.7 | 6851.3 | 0 | 0 | -1 | 1 | 1 | -1 | 1 | 1 |
| TR152289|c0_g1|m.48461 | Vitis vinifera | Putative uncharacterized protein | VIT_11s0016g03430 | 139.04 |  |  |  |  |  |  | 0 | 0 | 0 | 0 | 0 | 0 | 0 | 0 |
| TR152288|c1_g1|m.29767 |  |  |  | 25.681 |  |  |  |  |  |  | 0 | 0 | 0 | 0 | 0 | 0 | 0 | 0 |
| TR152290|c1_g1|m.32089 | Ricinus communis | Coatomer alpha subunit, putative | RCOM_1449180 | 3383.1 | 56.52 | 42.266 | 34.113 | 52.512 | 41.414 | 35.038 | 0 | -1 | 0 | 0 | 0 | 0 | 0 | 0 |
| TR152302|c0_g8|m.13552 | Nicotiana tabacum | Vacuolar invertase |  | 603.53 |  |  |  |  |  |  | 0 | 0 | 0 | 0 | 0 | 0 | 0 | 0 |
| TR152308|c1_g13|m.12624 | Glycine max | Uncharacterized protein |  | 4463.6 | 99.861 | 31.924 | 194.96 | 182.12 |  |  | 0 | 0 | 0 | -1 | -1 | 0 | 0 | 0 |
| TR152308|c1_g15|m.16729 |  |  |  | 5911.8 | 275.16 | 257.42 | 610.19 | 127.64 |  |  | 0 | 0 | 0 | -1 | -1 | 0 | 0 | 0 |
| TR152308|c1_g2|m.53325 | Ricinus communis | GRIP and coiled-coil domain-containing protein, putative | RCOM_1436850 | 502.35 |  |  | 127.44 | 87.18 |  |  | 0 | 0 | 1 | 0 | -1 | 0 | 0 | 0 |
| TR152308|c1_g5|m.60250 |  |  |  | 3916.5 | 139.63 | 144.38 | 200.95 | 189.8 |  | 20.286 | 0 | 0 | 0 | -1 | -1 | 0 | -1 | -1 |
| TR152308|c1_g9|m.18696 |  |  |  | 7969.9 | 231.38 | 193.03 | 253.52 | 259.05 | 338.76 |  | 1 | 1 | 0 | 0 | 0 | 0 | 0 | 0 |
| TR86365|c0_g1|m.18300 | Populus trichocarpa | Putative uncharacterized protein |  | 855.18 | 48.1 |  |  |  |  |  | 0 | 0 | -1 | -1 | 0 | 0 | 0 | 0 |
| TR152760|c0_g6|m.40795 | Populus trichocarpa | Predicted protein | POPTRDRAFT_713821 | 284 |  |  |  |  |  |  | 0 | 0 | 0 | 0 | 0 | 0 | 0 | 0 |
| TR97999|c0_g6|m.16263 | Vitis vinifera | Putative uncharacterized protein | VIT_07s0031g01330 | 942.89 |  |  |  |  |  | 192.75 | 0 | 0 | 0 | 1 | 1 | 0 | 0 | 0 |
| TR152773|c0_g5|m.34493 | Vitis vinifera | Putative uncharacterized protein | VIT_18s0001g11140 | 11957 | 59.498 | 128.99 | 183.74 | 186.02 | 126.74 | 95.722 | 0 | 0 | 0 | 0 | -1 | 0 | 0 | -1 |
| TR152779|c0_g10|m.38354 | Populus trichocarpa | Predicted protein | POPTRDRAFT_746733 | 5229.8 |  | 86.37 | 40.33 | 64.563 |  |  | 0 | -1 | 0 | -1 | -1 | 0 | 0 | 0 |
| TR152779|c0_g13|m.20671 | Vitis vinifera | Putative uncharacterized protein | VIT_17s0000g04910 | 38099 |  | 240.42 | 81.576 | 62.79 | 150.91 | 1100.9 | 0 | 0 | 0 | 0 | 0 | 0 | 0 | 0 |
| TR152781|c0_g14|m.28903 | Populus trichocarpa | Predicted protein | POPTRDRAFT_576915 | 1318.9 |  |  |  | 17.741 | 95.577 |  | 1 | 1 | 1 | 1 | 0 | 0 | 0 | 0 |
| TR152781|c0_g2|m.44312 | Capsicum annuum | Putative acetyl co-enzyme A carboxylase carboxyltransferase alpha subunit |  | 1106.2 | 141.73 | 37.393 |  |  |  |  | 0 | 0 | -1 | -1 | 0 | 0 | 0 | 0 |
| TR152781|c0_g8|m.36720 | Vitis vinifera | Putative uncharacterized protein | VIT_08s0007g01750 | 2567.3 |  | 100.47 |  |  |  |  | 0 | 0 | -1 | -1 | 0 | 0 | 0 | 0 |
| TR162538|c0_g4|m.49288 | Populus trichocarpa | Folylpolyglutamate synthase | FPGS2 | 785.51 | 32.745 | 48.523 |  | 23.188 | 101.89 |  | 0 | 0 | 0 | 0 | 0 | 0 | 0 | 0 |
| TR152783|c2_g11|m.49375 | Arabidopsis lyrata | Glyceraldehyde-3-phosphate dehydrogenase B subunit | GAPB | 14605 | 62.504 | 234.48 | 109.36 | 100.04 |  | 322.24 | 0 | 0 | 0 | 0 | 1 | 0 | 0 | 1 |
| TR163317|c0_g2|m.7417 | Ricinus communis | Dihydrodipicolinate synthase, putative | RCOM_0873980 | 755.7 |  |  |  | 40.911 |  |  | 0 | 0 | 1 | 0 | -1 | 0 | 0 | 0 |
| TR152805|c1_g5|m.19272 | Vitis vinifera | Putative uncharacterized protein | VITISV_006129 | 1685 |  |  |  |  |  |  | 0 | 0 | 0 | 0 | 0 | 0 | 0 | 0 |
| TR152831|c0_g1|m.17801 | Vitis vinifera | Putative uncharacterized protein | VIT_10s0003g04360 | 1822 | 35.777 | 16.259 | 16.053 | 14.989 | 49.731 | 64.169 | 0 | 0 | 0 | 0 | 1 | 0 | 0 | 1 |
| TR152837|c0_g12|m.12301 | Eriobotrya japonica | Phosphofructokinase alpha subunit | PFKa | 36730 | 329.32 | 183.58 | 50.174 |  | 2301.5 | 3109.4 | 0 | 0 | 0 | 1 | 0 | 0 | 1 | 0 |
| TR152837|c0_g3|m.27795 | Ricinus communis | Phosphofructokinase, putative | RCOM_1602260 | 543650 | 2650.2 | 3092.4 | 3113.4 | 2150.3 | 24627 | 23506 | 0 | 0 | 0 | 1 | 1 | 0 | 1 | 1 |
| TR152837|c0_g8|m.47277 | Citrus sinensis x Citrus trifoliata | Pyrophosphate-dependent phosphofructokinase alpha subunit |  | 175950 | 601.48 | 388.25 | 1710.5 | 1573.7 | 5945 | 5866.7 | 1 | 1 | 1 | 1 | 1 | 1 | 1 | 1 |
| TR152837|c0_g9|m.20094 | Populus trichocarpa | Predicted protein | POPTRDRAFT_761666 | 6708.4 |  |  | 24.259 | 9.0793 |  |  | 0 | 0 | 1 | 0 | -1 | 0 | 0 | 0 |
| TR152840|c0_g1|m.59439 | Populus trichocarpa | Predicted protein | POPTRDRAFT_572009 | 800.31 | 30.603 | 41.685 |  |  |  |  | 0 | 0 | -1 | -1 | 0 | 0 | 0 | 0 |
| TR152850|c0_g2|m.38840 | Vitis vinifera | Putative uncharacterized protein | VIT_13s0019g00510 | 10279 | 79.421 |  | 126.5 | 150.94 |  |  | 0 | 0 | 0 | -1 | -1 | 0 | 0 | 0 |
| TR153416|c0_g3|m.12515 | Populus trichocarpa | Predicted protein | POPTRDRAFT_830906 | 7771.4 |  |  |  |  | 732.62 |  | 0 | 0 | 0 | 1 | 1 | 0 | 0 | 0 |
| TR153417|c0_g2|m.57877 | Phytolacca americana | Glucosyltransferase | PaGT3 | 2530.3 | 48.431 |  | 45.77 | 26.515 | 111.98 | 151.47 | 0 | 0 | 0 | 0 | 1 | 0 | 0 | 1 |
| TR153418|c1_g2|m.34368 | Ricinus communis | NADH dehydrogenase, putative | RCOM_1450680 | 7907.2 | 26.65 | 214.9 | 448.57 | 159.26 |  |  | 0 | 0 | 0 | -1 | -1 | 0 | 0 | 0 |
| TR153428|c0_g1|m.41818 | Vitis vinifera | Putative uncharacterized protein | VIT_02s0012g02660 | 4009.4 | 11.694 |  |  |  | 281.13 |  | 0 | 0 | -1 | 0 | 1 | 0 | 0 | 0 |
| TR153436|c0_g1|m.12711 | Glycine max | Uncharacterized protein |  | 21994 | 242.58 | 543.67 | 136.25 | 137.52 | 353.5 | 190.96 | 0 | 0 | 0 | 0 | 0 | 0 | 0 | 0 |
| TR153449|c0_g3|m.17033 | Populus trichocarpa | Aspartate aminotransferase | POPTRDRAFT_654206 | 233860 | 3158 | 3163.5 | 2163.5 | 1124.9 | 6144.2 | 5706.8 | 0 | 0 | 0 | 1 | 1 | 0 | 1 | 1 |
| TR153472|c0_g1|m.15888 | Catharanthus roseus | Serine/threonine-protein phosphatase |  | 546.18 |  |  |  |  |  |  | 0 | 0 | 0 | 0 | 0 | 0 | 0 | 0 |
| TR153485|c1_g2|m.58531 | Populus trichocarpa | Predicted protein | POPTRDRAFT_561999 | 1371.7 |  | 40.636 |  | 30.53 |  | 98.252 | 0 | 0 | 0 | 0 | 0 | 0 | 0 | 0 |
| TR49342|c0_g1|m.26467 | Populus trichocarpa | Serine/threonine-protein phosphatase | POPTRDRAFT_712706 | 8394.2 | 42.737 |  | 113.32 | 51.025 | 71.412 | 140.15 | 1 | 1 | 0 | 0 | 0 | 0 | 0 | 0 |
| TR164818|c0_g1|m.20479 | Populus alba x Populus tremula | DEAD box RNA helicase | RH1 | 33061 | 387.8 | 344.68 | 311.43 | 266 | 757.43 | 817.38 | 0 | 0 | 0 | 1 | 1 | 0 | 1 | 1 |
| TR153510|c0_g1|m.25113 | Glycine max | Uncharacterized protein |  | 17367 |  | 370.88 | 362.44 | 362.66 |  |  | 0 | -1 | 0 | -1 | -1 | 0 | 0 | 0 |
| TR153837|c1_g1|m.617 | Ricinus communis | E3 ubiquitin protein ligase upl2, putative | RCOM_0482820 | 124.66 |  |  | 2.9601 | 0.3635 |  |  | 0 | 0 | 1 | 0 | -1 | 0 | 0 | 0 |
| TR153839|c119_g4|m.272 | Schlumbergera virus X | Coat protein |  | 42009 |  |  |  |  | 52.605 |  | 0 | 0 | 0 | 1 | 1 | 0 | 0 | 0 |
| TR153839|c119_g6|m.40558 | Schlumbergera virus X | Coat protein |  | 965320 | 4310.6 | 5102.6 | 737.89 | 264.91 | 50701 | 44404 | 0 | 0 | -1 | 1 | 1 | -1 | 1 | 1 |
| TR153861|c0_g1|m.12369 | Sorghum bicolor | Putative uncharacterized protein Sb04g002640 | Sb04g002640 | 637.34 | 3.4133 | 1.9036 |  | 7.7177 | 2.959 | 9.6374 | 0 | 0 | 0 | 0 | 0 | 0 | 0 | 0 |
| TR153888|c1_g1|m.54277 | Vitis vinifera | Putative uncharacterized protein | VIT_13s0067g01680 | 20490 | 230.07 | 351.49 | 373.99 | 333.5 | 547.39 | 803.27 | 1 | 1 | 0 | 0 | 0 | 0 | 0 | 0 |
| TR153891|c214_g9|m.29510 | Cactus virus X | Capsid protein | cp | 2009300 | 11121 | 18553 | 12669 | 15525 | 24627 | 30891 | 0 | 0 | 0 | 0 | 0 | 0 | 0 | 0 |
| TR153893|c5_g3|m.51315 | Populus trichocarpa | Predicted protein | POPTRDRAFT_568180 | 15055 | 255.52 | 359.72 | 75.201 |  |  | 813.36 | 0 | 0 | 0 | 0 | 0 | 0 | 0 | 0 |
| TR153907|c1_g1|m.19048 | Vitis vinifera | Putative uncharacterized protein | VIT_03s0038g04210 | 1006.9 | 2.095 |  | 17.124 | 1.9177 |  | 46.125 | 1 | 1 | 0 | 0 | 0 | 0 | 0 | 0 |
| TR154209|c1_g1|m.46806 | Vitis vinifera | Putative uncharacterized protein | VIT_19s0085g01090 | 23.716 |  |  |  |  |  |  | 0 | 0 | 0 | 0 | 0 | 0 | 0 | 0 |
| TR154182|c0_g2|m.44968 | Vitis vinifera | Putative uncharacterized protein | VITISV_033286 | 19290 | 206.3 | 217.04 | 374.27 | 257.45 | 326.24 | 266.47 | 0 | 0 | 0 | 0 | 0 | 0 | 0 | 0 |
| TR154182|c0_g4|m.38405 | Ricinus communis | Uro-adherence factor A, putative | RCOM_1392520 | 7910.7 | 37.096 | 70.342 | 2.8761 | 15.9 | 369.81 | 253.74 | 0 | 0 | 0 | 0 | 1 | 0 | 0 | 1 |
| TR154188|c2_g2|m.12468 | Vitis vinifera | Putative uncharacterized protein | VIT_18s0122g00160 | 2157.8 | 7.4493 | 10.22 | 58.571 | 25.325 | 18.611 |  | 0 | 0 | 0 | 0 | 0 | 0 | 0 | 0 |
| TR154223|c6_g8|m.61517 | Ricinus communis | Catalytic, putative | RCOM_1280750 | 732.52 |  | 169.93 |  |  |  |  | 0 | 0 | -1 | -1 | 0 | 0 | 0 | 0 |
| TR154260|c1_g1|m.56443 | Populus trichocarpa | Predicted protein (Fragment) | POPTRDRAFT_717340 | 200.74 | 87.251 |  |  |  |  |  | 0 | 0 | -1 | -1 | 0 | 0 | 0 | 0 |
| TR154260|c1_g7|m.34049 | Glycine max | Uncharacterized protein |  | 1228.6 |  |  |  |  |  |  | 0 | 0 | 0 | 0 | 0 | 0 | 0 | 0 |
| TR81406|c2_g1|m.45152 | Ricinus communis | Protein phosphatase 2c, putative | RCOM_0201140 | 9338.9 | 30.69 | 137.04 | 111.72 | 31.731 | 438.96 | 449.41 | 0 | 0 | 0 | 1 | 1 | 0 | 1 | 1 |
| TR154527|c4_g1|m.48158 | Arabidopsis lyrata | Putative uncharacterized protein | ARALYDRAFT_496774 | 98639 | 1519.9 | 1103.3 | 911.94 | 434.24 | 2308.6 | 1793.9 | 0 | 0 | 0 | 0 | 0 | 0 | 0 | 0 |
| TR154527|c4_g8|m.16203 | Solanum tuberosum | 14-3-3 protein | 35G | 2637.1 |  |  |  | 36.132 | 259.52 | 74.014 | 1 | 1 | 1 | 1 | 0 | 0 | 0 | 0 |
| TR154528|c0_g2|m.1984 | Vitis vinifera | Putative uncharacterized protein | VITISV_036490 | 12933 | 58.214 | 49.045 |  | 10.462 | 120.17 |  | 0 | 0 | 0 | 0 | 0 | 0 | 0 | 0 |
| TR154533|c0_g2|m.17899 | Solanum tuberosum | Mitogen-activated protein kinase | StMPK2 | 2286.1 | 7.9502 |  |  |  | 121.53 |  | 0 | 0 | -1 | 0 | 1 | 0 | 0 | 0 |
| TR154540|c0_g8|m.61351 | Suaeda glauca | RNA binding protein |  | 3512.7 |  |  | 214.2 | 151.54 |  |  | 0 | 0 | 1 | 0 | -1 | 0 | 0 | 0 |
| TR60062|c0_g3|m.53377 | Medicago truncatula | Glutaredoxin | MTR_3g077570 | 904.95 |  |  |  |  |  |  | 0 | 0 | 0 | 0 | 0 | 0 | 0 | 0 |
| TR154915|c0_g2|m.46484 | Cucumis melo | Glutamate-1-semialdehyde 2,1-aminomutase | hemL | 6039.9 | 69.725 | 94.471 | 78.862 | 90.246 | 291.06 | 232.82 | 1 | 1 | 0 | 1 | 1 | 0 | 1 | 1 |
| TR154918|c0_g6|m.61343 | Ricinus communis | NADH-ubiquinone oxidoreductase flavoprotein, putative | RCOM_1080980 | 41738 | 271.47 | 469.7 | 336.53 | 146.96 | 1004.2 | 703.73 | 0 | 0 | 0 | 0 | 0 | 0 | 0 | 0 |
| TR90563|c0_g3|m.62564 | Ricinus communis | 2-oxoglutarate/malate translocator, chloroplast, putative | RCOM_1578230 | 1337.6 |  |  | 71.283 |  |  | 56.596 | 0 | 0 | 1 | 1 | 0 | 0 | 0 | 0 |
| TR154925|c0_g2|m.32240 | Vitis vinifera | Putative uncharacterized protein | VIT_13s0067g01890 | 13360 | 291.67 | 312.89 | 194.16 | 182.49 | 138.38 | 84.734 | 0 | -1 | -1 | -1 | 0 | -1 | -1 | 0 |
| TR154937|c5_g12|m.37023 | Medicago truncatula | Alpha-amylase/subtilisin inhibitor | MTR_130s0010 | 835420 | 10216 | 10729 | 2512.9 | 818.65 | 54215 | 56244 | 0 | 0 | -1 | 1 | 1 | -1 | 1 | 1 |
| TR154937|c5_g16|m.25873 | Populus nigra | Kunitz-type trypsin inhibitor B2 |  | 187800 | 1350.5 | 646.08 |  | 44.2 | 3065.7 | 3102.1 | 0 | 0 | 0 | 1 | 1 | 0 | 1 | 1 |
| TR154937|c5_g3|m.58703 | Glycine max | Uncharacterized protein | Gma.30435 | 226460 | 1764.3 | 2449.1 | 216.49 | 24.259 | 14813 | 11043 | 0 | 0 | -1 | 1 | 1 | -1 | 1 | 1 |
| TR154939|c1_g2|m.31097 | Spinacia oleracea | Cysteine synthase | CSase A | 111570 | 763.75 | 1444.2 | 955.1 | 461.92 | 2915.8 | 4212.4 | 0 | 0 | 0 | 0 | 0 | 0 | 0 | 0 |
| TR154939|c1_g3|m.11443 | Spinacia oleracea | Cysteine synthase | CSase A | 33215 |  |  |  |  | 2396.6 | 1855 | 0 | 0 | 0 | 1 | 1 | 0 | 0 | 0 |
| TR85503|c0_g1|m.49718 | Vitis vinifera | Putative uncharacterized protein | VIT_12s0035g00310 | 9348.8 | 83.113 | 34.155 | 88.167 | 55.365 | 88.47 | 417.47 | 1 | 1 | 0 | 0 | 0 | 0 | 0 | 0 |
| TR154979|c0_g4|m.26236 | Glycine max | Uncharacterized protein | Gma.2000 | 3507.9 | 147.95 | 16.734 | 110.39 | 31.752 | 96.819 | 98.573 | 1 | 1 | 0 | 0 | 0 | 0 | 0 | 0 |
| TR154981|c0_g2|m.62682 | Glycine max | Uncharacterized protein | Gma.28954 | 108820 | 1683 | 1357.9 | 1288.3 | 891.69 | 2566.5 | 3140.3 | 0 | 0 | 0 | 0 | 1 | 0 | 0 | 1 |
| TR154982|c0_g7|m.37508 | Vitis vinifera | Putative uncharacterized protein | VIT_06s0004g07110 | 1320.1 |  |  | 44.828 |  |  |  | 0 | 0 | 1 | 0 | -1 | 0 | 0 | 0 |
| TR154984|c0_g1|m.4976 | Bruguiera gymnorhiza | Hydroxypyruvate reductase | HPR | 199.5 | 10.956 |  |  |  |  |  | 0 | 0 | -1 | -1 | 0 | 0 | 0 | 0 |
| TR154984|c0_g4|m.46664 | Populus trichocarpa | Predicted protein | POPTRDRAFT_818203 | 4569.5 | 177.52 |  |  |  | 467.63 | 406.68 | 0 | 0 | -1 | 0 | 1 | 0 | 0 | 0 |
| TR154985|c0_g1|m.16652 | Vitis vinifera | Putative uncharacterized protein | VIT_02s0025g02430 | 25401 | 462.92 | 204.87 |  | 43.796 | 817.51 |  | 0 | 0 | 0 | 0 | 0 | 0 | 0 | 0 |
| TR155388|c0_g2|m.61656 | Vitis vinifera | Putative uncharacterized protein | VIT_04s0044g01000 | 2889.5 | 35.683 | 68.083 | 137.07 | 92.018 |  |  | 0 | 0 | 0 | -1 | -1 | 0 | 0 | 0 |
| TR155389|c0_g17|m.33268 | Gossypium schwendimanii | Adenylyl cyclase-associated protein |  | 5896.3 |  | 105.75 |  | 93.263 |  | 278.54 | 0 | 0 | 0 | 0 | 0 | 0 | 0 | 0 |
| TR155402|c0_g1|m.34045 | Ricinus communis | Putative uncharacterized protein | RCOM_1678570 | 185.08 |  |  |  | 6.2127 |  | 13.009 | 1 | 1 | 1 | 1 | 0 | 0 | 0 | 0 |
| TR164516|c0_g4|m.10763 | Ricinus communis | Protein RCC2, putative | RCOM_1596800 | 1051.5 |  |  |  |  |  |  | 0 | 0 | 0 | 0 | 0 | 0 | 0 | 0 |
| TR155459|c0_g2|m.5976 | Vitis vinifera | Ubiquitin carboxyl-terminal hydrolase | VIT_19s0014g03920 | 5487.1 | 60.376 | 61.62 | 14.827 | 13.48 | 289.87 | 255.5 | 0 | 0 | -1 | 1 | 1 | -1 | 1 | 1 |
| TR155470|c0_g4|m.60902 | Vitis vinifera | Putative uncharacterized protein | VIT_01s0011g00650 | 721.41 |  |  |  |  |  |  | 0 | 0 | 0 | 0 | 0 | 0 | 0 | 0 |
| TR155481|c0_g3|m.52668 | Vitis vinifera | Putative uncharacterized protein | VIT_11s0052g00670 | 221.34 |  |  |  |  |  |  | 0 | 0 | 0 | 0 | 0 | 0 | 0 | 0 |
| TR155486|c0_g2|m.4799 | Vitis vinifera | Putative uncharacterized protein | VIT_12s0055g01130 | 1136 | 29.759 | 17.531 | 21.935 | 19.993 | 31.844 | 36.51 | 0 | 0 | 0 | 0 | 1 | 0 | 0 | 1 |
| TR155814|c0_g3|m.24378 | Vitis vinifera | Putative uncharacterized protein | VIT_02s0025g00100 | 6480.1 |  | 19.808 | 55.851 | 59.848 | 268.86 | 229.57 | 1 | 1 | 0 | 0 | 1 | 0 | 0 | 1 |
| TR155837|c1_g19|m.14778 | Vitis vinifera | Putative uncharacterized protein | VIT_18s0001g00490 | 16893 |  | 23.835 | 51.46 | 10.91 |  |  | 0 | -1 | 0 | -1 | -1 | 0 | 0 | 0 |
| TR84862|c1_g21|m.23071 | Ricinus communis | Estradiol 17 beta-dehydrogenase, putative | RCOM_1600000 | 3587.3 |  |  |  |  | 66.341 |  | 0 | 0 | 0 | 1 | 1 | 0 | 0 | 0 |
| TR155842|c1_g7|m.35769 | Vitis vinifera | Putative uncharacterized protein | VIT_00s0283g00020 | 8182.7 |  | 102.48 | 45.647 | 39.126 | 228.22 | 224.52 | 0 | 0 | 0 | 1 | 1 | 0 | 1 | 1 |
| TR155847|c0_g2|m.56157 | Populus trichocarpa | Predicted protein | POPTRDRAFT_827287 | 282000 | 1939.1 | 2586 | 1705.1 | 1204.6 | 5183.6 | 4553.1 | 0 | 0 | 0 | 1 | 1 | 0 | 1 | 1 |
| TR155851|c0_g3|m.32029 | Vitis vinifera | Putative uncharacterized protein | VIT_19s0014g01520 | 78455 | 496.59 | 498.56 | 382.77 | 228.47 | 2917 | 2203.7 | 0 | 0 | 0 | 1 | 1 | 0 | 1 | 1 |
| TR49368|c0_g4|m.40911 | Oryza coarctata | Triosephosphate isomerase |  | 1447400 | 14982 | 15142 | 5169.1 | 3403.2 | 47485 | 46880 | 0 | 0 | -1 | 1 | 1 | -1 | 1 | 1 |
| TR98861|c0_g2|m.38196 | Vitis vinifera | Putative uncharacterized protein | VIT_03s0038g02620 | 1392.3 |  |  |  |  | 109.52 | 40.456 | 0 | 0 | 0 | 1 | 1 | 0 | 0 | 0 |
| TR157055|c1_g4|m.60995 | Ricinus communis | Bromodomain-containing protein | RCOM_0810140 | 3051.8 | 21.754 | 4.2914 |  |  |  |  | 0 | 0 | -1 | -1 | 0 | 0 | 0 | 0 |
| TR155890|c0_g2|m.8396 | Vitis vinifera | Aspartate aminotransferase | VIT_11s0016g03720 | 138130 | 1371.2 | 870.88 | 960.73 | 533.79 | 4517.4 | 3534 | 0 | 0 | 0 | 1 | 1 | 0 | 1 | 1 |
| TR155896|c0_g2|m.9111 | Gossypium hirsutum | Arabinose kinase (Fragment) |  | 12778 | 32.534 | 37.964 | 221.89 | 19.069 | 900.57 | 662.81 | 1 | 1 | 0 | 1 | 0 | 0 | 1 | 0 |
| TR156881|c0_g2|m.17746 | Lotus japonicus | Uncharacterized protein |  | 3399 |  |  |  |  |  |  | 0 | 0 | 0 | 0 | 0 | 0 | 0 | 0 |
| TR2666|c0_g2|m.16571 | Vitis vinifera | Putative uncharacterized protein | VIT_18s0001g07230 | 5538.3 |  | 127.65 | 41.792 | 63.113 | 158.76 |  | 0 | 0 | 0 | 0 | 0 | 0 | 0 | 0 |
| TR156898|c0_g2|m.9304 | Vitis vinifera | Putative uncharacterized protein | VIT_12s0028g03370 | 5663.1 |  |  | 74.276 |  | 171.44 | 338.16 | 1 | 1 | 1 | 1 | 0 | 0 | 0 | 0 |
| TR156905|c0_g4|m.57022 | Dimocarpus longan | Putative uncharacterized protein |  | 15250 | 285.17 | 188.35 | 174.84 | 161.96 | 94.225 | 372.01 | 0 | 0 | 0 | 0 | 0 | 0 | 0 | 0 |
| TR156910|c0_g4|m.2253 | Vitis vinifera | UDP-glucose 6-dehydrogenase | VITISV_020300 | 19036 | 223.6 | 366.07 | 404.09 | 301.34 | 135.72 | 187.86 | 0 | 0 | 0 | 0 | 0 | 0 | 0 | 0 |
| TR15694|c0_g1|m.28649 | Vitis vinifera | Putative uncharacterized protein | VIT_08s0032g00440 | 6075.9 |  | 348.2 | 343.35 | 160.41 |  |  | 0 | -1 | 0 | -1 | -1 | 0 | 0 | 0 |
| TR85336|c0_g2|m.47816 | Vitis vinifera | Putative uncharacterized protein | VITISV_027247 | 8269.3 |  |  |  |  | 826.88 | 132.51 | 0 | 0 | 0 | 1 | 1 | 0 | 0 | 0 |
| TR156948|c0_g1|m.1309 | Hevea brasiliensis | Uncharacterized protein |  | 3983.2 | 167.68 | 147.22 | 69.165 |  |  |  | 0 | -1 | 0 | -1 | -1 | 0 | 0 | 0 |
| TR63511|c0_g3|m.14592 | Hevea brasiliensis | 60S ribosomal protein L17B | RPL17B | 132740 | 1746.7 | 2097.3 | 1604.6 | 767.09 | 3976 | 4685 | 0 | 0 | 0 | 1 | 1 | 0 | 1 | 1 |
| TR59603|c0_g1|m.24627 | Ricinus communis | Polyadenylate-binding protein, putative | RCOM_1502800 | 865.05 | 88.888 | 46.248 | 102.21 |  |  |  | 0 | 0 | 0 | -1 | -1 | 0 | 0 | 0 |
| TR156977|c0_g1|m.35306 | Glycine max | Pyruvate kinase |  | 1486.6 |  | 24.901 |  | 15.612 |  |  | 0 | -1 | 0 | -1 | -1 | 0 | 0 | 0 |
| TR156977|c0_g3|m.13356 | Medicago truncatula | Pyruvate kinase | MTR_1g061630 | 37316 | 366.23 | 110.89 | 97.345 | 69.254 |  | 372.85 | 0 | 0 | 0 | 0 | 0 | 0 | 0 | 0 |
| TR156997|c2_g2|m.15567 | Populus trichocarpa | Predicted protein | POPTRDRAFT_799433 | 4307 | 59.269 | 127.64 | 33.254 | 23.515 | 83.981 |  | 0 | 0 | 0 | 0 | 0 | 0 | 0 | 0 |
| TR156998|c0_g1|m.29267 | Ricinus communis | Sulfite reductase [ferredoxin], putative | RCOM_1577810 | 2865.2 | 48.025 | 41.251 | 16.953 | 17.469 | 104.81 | 35.01 | 0 | 0 | -1 | 0 | 0 | -1 | 0 | 0 |
| TR164469|c0_g2|m.46963 | Glycine max | Uncharacterized protein | Gma.5903 | 11461 | 98.27 | 81.913 | 88.763 | 96.773 | 172.68 | 111.64 | 1 | 1 | 0 | 0 | 0 | 0 | 0 | 0 |
| TR157016|c0_g4|m.40561 | Vitis vinifera | Putative uncharacterized protein | VITISV_000290 | 14105 | 104.83 | 92.211 | 103.43 | 111.38 | 142.37 | 259.4 | 1 | 1 | 0 | 0 | 0 | 0 | 0 | 0 |
| TR97346|c3_g3|m.58767 | Vitis vinifera | Citrate synthase | VIT_12s0142g00610 | 16139 | 89.345 | 213.97 | 136.63 | 143.72 | 343.31 | 133.28 | 1 | 1 | 0 | 0 | 0 | 0 | 0 | 0 |
| TR157030|c0_g7|m.45006 | Vitis vinifera | Putative uncharacterized protein | VIT_05s0029g01090 | 3532.3 | 54.074 | 44.97 | 76.549 | 33.543 | 155.84 | 97.214 | 1 | 1 | 0 | 0 | 0 | 0 | 0 | 0 |
| TR15704|c0_g1|m.25301 | Mirabilis jalapa | Putative calcium-binding EF-hand protein (Fragment) |  | 165.7 |  |  |  | 18.007 |  |  | 0 | 0 | 1 | 0 | -1 | 0 | 0 | 0 |
| TR157043|c0_g3|m.55326 | Mesembryanthemum crystallinum | Glucose-6-phosphate 1-dehydrogenase | G6PD | 75314 | 1448.9 | 755.92 | 1025.9 | 361.89 | 2329.2 | 2061.5 | 0 | 0 | 0 | 0 | 0 | 0 | 0 | 0 |
| TR157053|c0_g2|m.62125 | Vitis vinifera | Putative uncharacterized protein | VIT_05s0077g00550 | 1624.3 |  | 63.754 | 115.08 | 105.11 | 36.848 | 40.948 | 0 | 0 | 0 | 0 | -1 | 0 | 0 | -1 |
| TR157061|c0_g1|m.15621 | Populus trichocarpa | Predicted protein | POPTRDRAFT_835003 | 393.74 |  |  |  | 10.704 |  |  | 0 | 0 | 1 | 0 | -1 | 0 | 0 | 0 |
| TR157061|c0_g3|m.41015 | Populus trichocarpa | Predicted protein | POPTRDRAFT_835003 | 2467.8 | 13.026 |  | 49.035 | 33.429 |  |  | 0 | 0 | 0 | -1 | -1 | 0 | 0 | 0 |
| TR157062|c0_g1|m.35793 | Vitis vinifera | Putative uncharacterized protein | VIT_11s0052g01400 | 1953.3 | 8.6635 | 8.5427 | 31.359 | 8.4218 | 26.54 | 130.1 | 1 | 1 | 0 | 0 | 0 | 0 | 0 | 0 |
| TR1767|c0_g1|m.33471 | Vitis vinifera | Putative uncharacterized protein | VIT_16s0098g01630 | 10810 | 191.81 | 262.37 | 20.419 |  | 199.56 | 88.6 | 0 | 0 | 0 | 0 | 0 | 0 | 0 | 0 |
| TR15808|c7_g15|m.35704 | Capsicum annuum | Non-specific lipid-transfer protein (Precursor) | LTPII | 9430.4 |  | 64.704 |  |  |  | 427.68 | 0 | 0 | -1 | 0 | 1 | 0 | 0 | 0 |
| TR158290|c0_g1|m.31799 | Solanum tuberosum | Why2 protein |  | 8920.4 | 113.9 |  | 73.227 |  | 379.5 | 382.02 | 0 | 0 | 0 | 1 | 1 | 0 | 1 | 1 |
| TR158301|c0_g6|m.45914 | Populus trichocarpa | Predicted protein | POPTRDRAFT_551478 | 18905 | 139.35 | 71.808 | 201.75 | 71.04 |  | 395.19 | 1 | 1 | 0 | 0 | 0 | 0 | 0 | 0 |
| TR39521|c2_g1|m.27031 | Arabidopsis thaliana | At1g22780 | PFL | 310990 | 4431.9 | 1721.6 | 841.15 | 1152.8 | 8744 | 7360.8 | 0 | 0 | 0 | 0 | 1 | 0 | 0 | 1 |
| TR158321|c0_g1|m.57440 | Camellia sinensis | Phragmoplastin |  | 3875.8 |  |  | 19.817 | 26.284 | 81.021 |  | 1 | 1 | 1 | 1 | 0 | 0 | 0 | 0 |
| TR158323|c0_g1|m.14603 | Vitis vinifera | Putative uncharacterized protein | VITISV_006460 | 31887 | 369.24 | 510.83 | 261.6 | 213.87 | 397.66 | 536.8 | 0 | 0 | 0 | 0 | 0 | 0 | 0 | 0 |
| TR65742|c0_g4|m.21397 | Vitis vinifera | Putative uncharacterized protein | VIT_01s0011g00770 | 161.61 |  |  |  |  |  |  | 0 | 0 | 0 | 0 | 0 | 0 | 0 | 0 |
| TR94564|c0_g6|m.37129 | Chenopodium rubrum | Small heat-shock protein | hsp17 | 12605 | 84.099 | 109.16 | 69.027 | 33.14 | 348.13 | 296.73 | 0 | 0 | 0 | 1 | 1 | 0 | 1 | 1 |
| TR158352|c0_g6|m.57212 | Citrullus lanatus | HSP23.5 |  | 39401 | 263.26 | 251.01 | 178.41 | 39.688 | 1972.9 |  | 0 | 0 | 0 | 1 | 1 | 0 | 1 | 1 |
| TR158352|c0_g7|m.32694 | Chenopodium rubrum | Small heat-shock protein | hsp17 | 6097 |  | 143 | 58.429 |  | 657.14 |  | 0 | 0 | 0 | 0 | 0 | 0 | 0 | 0 |
| TR158360|c0_g3|m.4641 | Silene latifolia | Nicotinate phosphoribosyltransferase (Fragment) |  | 310.01 |  |  |  |  |  |  | 0 | 0 | 0 | 0 | 0 | 0 | 0 | 0 |
| TR47958|c1_g2|m.61907 | Vitis vinifera | Putative uncharacterized protein | VIT_19s0014g00180 | 20606 | 300.03 | 285 | 166.85 | 147.07 | 317.91 | 164.91 | 0 | 0 | -1 | 0 | 0 | -1 | 0 | 0 |
| TR158364|c0_g3|m.6816 | Ricinus communis | Putative uncharacterized protein | RCOM_0804290 | 2227.9 | 80.951 | 68.737 |  |  |  | 136.27 | 0 | 0 | -1 | 0 | 1 | 0 | 0 | 0 |
| TR158366|c0_g4|m.54533 | Glycine max | Uncharacterized protein | Gma.55913 | 3677 |  |  |  |  | 589.44 |  | 0 | 0 | 0 | 1 | 1 | 0 | 0 | 0 |
| TR59688|c1_g5|m.45424 | Medicago truncatula | Octicosapeptide/Phox/Bem1p | MTR_2g010160 | 4667.8 | 142 | 146.03 | 94.988 | 131.41 |  |  | 0 | -1 | 0 | -1 | -1 | 0 | 0 | 0 |
| TR160642|c1_g4|m.52233 | Populus trichocarpa | Predicted protein (Fragment) | POPTRDRAFT_255463 | 5964.5 |  |  |  |  | 418.94 | 461.15 | 0 | 0 | 0 | 1 | 1 | 0 | 0 | 0 |
| TR158382|c1_g6|m.21358 | Vitis vinifera | Putative uncharacterized protein | VIT_08s0007g00190 | 1178.5 | 20.818 |  | 19.528 | 14.882 | 77.279 |  | 0 | 0 | 0 | 0 | 1 | 0 | 0 | 1 |
| TR158629|c0_g1|m.32439 | Vitis vinifera | Putative uncharacterized protein | VIT_18s0001g07740 | 271.83 |  | 8.2706 |  |  |  | 76.297 | 0 | 0 | -1 | 0 | 1 | 0 | 0 | 0 |
| TR158646|c1_g3|m.59328 | Mesembryanthemum crystallinum | Putative plastidic adenylate transporter | ANT1 | 1784.1 |  | 20.963 | 14.711 | 69.404 | 112.67 |  | 1 | 1 | 0 | 0 | 0 | 0 | 0 | 0 |
| TR158648|c1_g2|m.29070 | Vitis vinifera | Putative uncharacterized protein | VIT_06s0061g01170 | 226.36 |  | 19.877 |  |  |  |  | 0 | 0 | -1 | -1 | 0 | 0 | 0 | 0 |
| TR158664|c0_g1|m.33265 | Solanum lycopersicum | Starch synthase III |  | 5446 | 92.165 | 49.868 | 63.608 | 30.474 | 153.3 | 106.72 | 0 | 0 | 0 | 0 | 0 | 0 | 0 | 0 |
| TR86046|c1_g2|m.7878 | Ricinus communis | Nucleotide binding protein, putative | RCOM_0601590 | 274.36 | 5.5745 |  |  |  |  | 7.314 | 0 | 0 | -1 | 0 | 1 | 0 | 0 | 0 |
| TR158686|c0_g3|m.52682 | Ricinus communis | ATP binding protein, putative | RCOM_0026260 | 631.22 | 3.7231 | 46.193 |  | 9.0202 |  |  | 0 | -1 | 0 | -1 | -1 | 0 | 0 | 0 |
| TR158703|c1_g12|m.21038 | Nicotiana tabacum | Vacuolar invertase |  | 4879.1 |  |  | 70.937 | 31.391 | 177.42 | 73.646 | 1 | 1 | 1 | 1 | 0 | 0 | 0 | 0 |
| TR159654|c0_g1|m.45127 | Glycine max | Uncharacterized protein | Gma.45373 | 3603.8 | 37.875 | 12.874 |  | 32.351 |  | 47.614 | 1 | 1 | 0 | 0 | 0 | 0 | 0 | 0 |
| TR159678|c1_g9|m.28253 | Thellungiella halophila | mRNA, clone: RTFL01-48-B14 |  | 79283 | 376.35 | 572.96 | 654.55 | 471.98 | 2083.9 | 492.9 | 1 | 1 | 0 | 0 | 0 | 0 | 0 | 0 |
| TR159684|c0_g2|m.55291 | Vitis vinifera | Putative uncharacterized protein | VIT_18s0072g00780 | 1760 | 13.469 |  | 11.927 |  | 49.797 |  | 0 | 0 | 0 | 0 | 0 | 0 | 0 | 0 |
| TR163953|c0_g3|m.49679 | Vitis vinifera | Putative uncharacterized protein | VIT_14s0128g00100 | 31914 | 439.33 | 436.98 | 387.37 | 390.62 | 375.04 | 550.4 | 0 | 0 | 0 | 0 | 0 | 0 | 0 | 0 |
| TR159687|c0_g2|m.1963 | Populus trichocarpa | Predicted protein | POPTRDRAFT_595547 | 12755 | 81.298 | 148.4 | 207.94 | 200.75 | 185.24 | 141.62 | 0 | 0 | 0 | 0 | 0 | 0 | 0 | 0 |
| TR159688|c0_g1|m.47004 | Ricinus communis | Malic enzyme | RCOM_1049930 | 9515.4 | 326.79 | 499.89 | 276.68 | 61.852 | 409.81 | 222.64 | 0 | 0 | 0 | 0 | 0 | 0 | 0 | 0 |
| TR159734|c0_g4|m.11503 | Ricinus communis | Ferredoxin--NADP reductase, putative | RCOM_0431000 | 111190 | 2018.6 | 2473.2 | 972.37 | 614.2 | 3168.5 | 3112.7 | 0 | 0 | -1 | 0 | 1 | -1 | 0 | 1 |
| TR159736|c0_g4|m.37465 | Vitis vinifera | Putative uncharacterized protein | VIT_13s0067g03210 | 15718 | 115.07 | 388.89 | 146.88 | 122.02 | 396.53 | 276.64 | 0 | 0 | 0 | 0 | 0 | 0 | 0 | 0 |
| TR15997|c1_g1|m.58524 | Vitis vinifera | Putative uncharacterized protein | VIT_03s0063g02110 | 1102.2 | 85.046 |  |  | 34.555 |  |  | 0 | -1 | 0 | -1 | -1 | 0 | 0 | 0 |
| TR16016|c0_g1|m.46187 | Medicago truncatula | Macrophage migration inhibitory factor-like protein | MTR_4g127370 | 302.15 |  |  |  |  |  |  | 0 | 0 | 0 | 0 | 0 | 0 | 0 | 0 |
| TR160392|c0_g2|m.28483 | Vitis vinifera | Translation initiation factor IF-2 | VIT_19s0027g00130 | 887.06 | 22.572 |  | 5.2905 |  | 34.202 | 51.102 | 0 | 0 | 0 | 0 | 0 | 0 | 0 | 0 |
| TR160402|c0_g1|m.27641 | Populus trichocarpa | Predicted protein | POPTRDRAFT_1082525 | 4961.1 | 74.324 | 86.126 | 36.287 | 42.203 | 208.15 | 132.94 | 0 | 0 | -1 | 0 | 0 | -1 | 0 | 0 |
| TR160428|c0_g5|m.28153 | Vitis vinifera | Putative uncharacterized protein | VIT_07s0005g04180 | 911.36 |  |  | 41.335 |  |  | 53.807 | 1 | 1 | 1 | 1 | 0 | 0 | 0 | 0 |
| TR160437|c0_g3|m.12529 | Ricinus communis | Aspartic proteinase nepenthesin-1, putative | RCOM_1452350 | 12518 | 251.39 | 331.32 | 320.66 | 249.49 | 110.94 | 199.73 | 0 | -1 | 0 | 0 | 0 | 0 | 0 | 0 |
| TR160443|c1_g12|m.5337 | Vitis vinifera | Putative uncharacterized protein | VIT_05s0102g00100 | 3204 | 25.792 | 37.293 | 35.429 | 6.6465 | 120.57 |  | 0 | 0 | 0 | 0 | 0 | 0 | 0 | 0 |
| TR160447|c0_g1|m.19816 | Vitis vinifera | Putative uncharacterized protein | VIT_19s0015g01270 | 235.15 |  |  | 1.6513 |  | 15.632 |  | 1 | 1 | 1 | 1 | 0 | 0 | 0 | 0 |
| TR160452|c2_g4|m.57691 | Ricinus communis | Patellin-3, putative | RCOM_1332620 | 40507 | 418.7 | 737.58 | 890.34 | 705.55 | 613.98 | 1522.1 | 1 | 1 | 0 | 0 | 0 | 0 | 0 | 0 |
| TR160452|c2_g8|m.41261 | Trifolium pratense | Putative cytosolic factor |  | 3475.5 | 118.16 | 71.468 | 234.87 | 271.43 |  |  | 0 | 0 | 1 | -1 | -1 | 1 | 0 | 0 |
| TR90156|c1_g16|m.42280 | Spinacia oleracea | Heat shock 70 protein | HSC70-11 | 21925 | 371.01 | 350.07 | 62.615 | 37.622 |  |  | 0 | -1 | -1 | -1 | -1 | -1 | 0 | 0 |
| TR160453|c2_g19|m.49519 | Vitis vinifera | Putative uncharacterized protein | VIT_03s0097g00530 | 6307.7 | 45.306 | 172.76 | 132.98 | 99.777 |  |  | 0 | 0 | 0 | -1 | -1 | 0 | 0 | 0 |
| TR160453|c2_g4|m.27449 | Spinacia oleracea | Heat shock 70 protein | HSC70-10 | 507.42 |  | 33.926 |  | 63.184 |  |  | 0 | 0 | 0 | -1 | -1 | 0 | 0 | 0 |
| TR90209|c2_g4|m.53009 | Glycine max | Uncharacterized protein | Gma.51843 | 22968 | 205.25 | 261.37 | 250.67 | 239.4 | 711.02 | 349.73 | 1 | 1 | 0 | 0 | 0 | 0 | 0 | 0 |
| TR160489|c0_g2|m.35700 | Glycine max | Uncharacterized protein |  | 21532 | 169.33 | 188.63 | 223.46 | 241.55 | 515.42 | 494.4 | 1 | 1 | 0 | 1 | 1 | 0 | 1 | 1 |
| TR160619|c0_g1|m.8549 | Glycine max | Uncharacterized protein |  | 2739.8 | 5.2 |  | 11.244 |  | 85.835 | 133.82 | 1 | 1 | 0 | 0 | 0 | 0 | 0 | 0 |
| TR160625|c0_g12|m.49790 | Populus trichocarpa | Tubulin, beta chain | TUB8 | 243630 | 800.33 | 1154.6 | 1407.3 | 1047.7 | 8690.6 | 9106 | 1 | 1 | 0 | 1 | 1 | 0 | 1 | 1 |
| TR160643|c0_g6|m.22355 | Ricinus communis | Mitochondrial phosphate carrier protein, putative | RCOM_1445550 | 49657 | 215.82 | 864.44 | 447.16 | 361.28 | 2127.9 | 1426.1 | 0 | 0 | 0 | 0 | 0 | 0 | 0 | 0 |
| TR160644|c0_g1|m.25441 | Arabidopsis thaliana | Alkaline-phosphatase-like protein | T16L4.190 | 1995.1 | 47.41 | 20.744 | 9.5742 |  |  | 97.604 | 0 | 0 | 0 | 0 | 0 | 0 | 0 | 0 |
| TR160664|c0_g1|m.46079 | Solanum lycopersicum | Malate dehydrogenase | mdh | 332370 | 3502.6 | 4172.3 | 1389 | 1001 | 11922 | 11695 | 0 | 0 | -1 | 1 | 1 | -1 | 1 | 1 |
| TR49785|c0_g1|m.34266 | Populus trichocarpa | Predicted protein | POPTRDRAFT_835769 | 19697 | 215.9 | 218.49 | 257.84 | 188.5 | 850.3 | 781.56 | 1 | 1 | 0 | 1 | 1 | 0 | 1 | 1 |
| TR16089|c1_g2|m.4102 | Vitis vinifera | Putative uncharacterized protein | VIT_05s0062g01430 | 6901.5 | 334.91 | 406.82 | 33.977 |  | 37.542 | 117.38 | 0 | 0 | 0 | -1 | 0 | 0 | -1 | 0 |
| TR81446|c0_g1|m.30822 | Vitis vinifera | Putative uncharacterized protein | VIT_18s0001g11750 | 17637 | 208.28 | 591.13 | 57.087 |  | 618.54 | 165.31 | 0 | 0 | 0 | 0 | 0 | 0 | 0 | 0 |
| TR16113|c0_g3|m.45902 | Vitis vinifera | Putative uncharacterized protein | VITISV_030670 | 337590 | 5440.8 | 5076 | 1768.7 | 3134.2 | 1254.1 |  | 0 | -1 | 0 | 0 | 0 | 0 | 0 | 0 |
| TR16140|c0_g1|m.18822 | Phytolacca acinosa | EXP1 |  | 2152.8 |  |  |  |  |  |  | 0 | 0 | 0 | 0 | 0 | 0 | 0 | 0 |
| TR16171|c0_g1|m.6663 | Medicago truncatula | 40S ribosomal protein | MTR_5g097200 | 32938 | 4.3979 | 36.125 | 269.57 | 270.94 | 1269.8 | 1071.5 | 1 | 1 | 1 | 1 | 1 | 1 | 1 | 1 |
| TR16175|c0_g1|m.12257 | Glycine max | Uncharacterized protein |  | 5047.3 |  |  |  | 71.474 | 272.71 |  | 1 | 1 | 1 | 1 | 0 | 0 | 0 | 0 |
| TR16179|c2_g6|m.59912 | Glycine max | Uncharacterized protein | Gma.15376 | 24993 |  |  | 370.26 |  |  | 645.07 | 1 | 1 | 1 | 1 | 0 | 0 | 0 | 0 |
| TR162481|c0_g7|m.22367 | Ricinus communis | Calcium lipid binding protein, putative | RCOM_1598440 | 11491 | 147.54 | 316.74 | 378.88 | 237.88 | 35.002 | 134.36 | 0 | 0 | 0 | 0 | 0 | 0 | 0 | 0 |
| TR162481|c0_g9|m.27103 | Populus trichocarpa | Plant synaptotagmin | NTMC2T1.2 | 5866.1 | 79.788 | 82.17 | 256.58 | 109.66 | 75.341 | 317.14 | 0 | 0 | 0 | 0 | 0 | 0 | 0 | 0 |
| TR162482|c0_g1|m.24971 | Ricinus communis | Histidyl-tRNA synthetase, putative | RCOM_0741740 | 132.6 |  |  | 8.1611 |  |  |  | 0 | 0 | 1 | 0 | -1 | 0 | 0 | 0 |
| TR164453|c0_g1|m.33537 | Populus trichocarpa | Predicted protein | POPTRDRAFT_768420 | 923.98 | 6.515 | 3.993 | 5.8169 | 14.882 |  |  | 0 | 0 | 0 | -1 | -1 | 0 | 0 | 0 |
| TR162493|c0_g13|m.21708 | Populus trichocarpa | Predicted protein | POPTRDRAFT_548424 | 5724.5 | 80.803 | 32.94 | 90.621 |  |  | 188.91 | 1 | 1 | 0 | 0 | 0 | 0 | 0 | 0 |
| TR162493|c0_g16|m.58437 | Populus trichocarpa | Predicted protein | POPTRDRAFT_548424 | 18779 |  |  |  |  | 1574 | 1397.1 | 0 | 0 | 0 | 1 | 1 | 0 | 0 | 0 |
| TR162506|c0_g2|m.31662 | Ipomoea batatas | Glucose-1-phosphate adenylyltransferase |  | 140930 | 2195.1 | 2785.9 | 1373.6 | 916.92 | 6064.4 | 4230.2 | 0 | 0 | 0 | 0 | 0 | 0 | 0 | 0 |
| TR163988|c0_g1|m.23231 | Vitis vinifera | Putative uncharacterized protein | VIT_17s0000g05540 | 41173 | 514.44 | 420.01 | 628.68 | 493 | 1028.4 | 966.85 | 1 | 1 | 0 | 1 | 1 | 0 | 1 | 1 |
| TR162531|c0_g1|m.23852 | Glycine max | Uncharacterized protein | Gma.29862 | 947.13 |  |  |  |  | 49.22 |  | 0 | 0 | 0 | 1 | 1 | 0 | 0 | 0 |
| TR162542|c0_g2|m.42339 | Vitis vinifera | Putative uncharacterized protein | VIT_14s0108g01650 | 4310.1 |  |  | 37.132 |  |  |  | 0 | 0 | 1 | 0 | -1 | 0 | 0 | 0 |
| TR162543|c1_g17|m.62654 | Silene latifolia | Arginine/serine-rich-splicing factor (Fragment) |  | 4455.4 |  | 135.23 | 21.229 | 31.448 | 88.607 |  | 0 | 0 | 0 | 0 | 0 | 0 | 0 | 0 |
| TR162550|c0_g8|m.37416 | Vitis vinifera | Putative uncharacterized protein | VIT_05s0062g00830 | 34672 | 431.64 | 379.81 | 328.24 | 251.8 | 763.59 | 733.55 | 0 | 0 | 0 | 1 | 1 | 0 | 1 | 1 |
| TR162552|c0_g2|m.1179 | Vitis vinifera | Putative uncharacterized protein | VIT_07s0005g01460 | 587.08 | 8.3028 | 19.846 |  | 7.1158 |  |  | 0 | -1 | 0 | -1 | -1 | 0 | 0 | 0 |
| TR162562|c0_g4|m.22756 | Glycine max | Uncharacterized protein |  | 20387 | 657.73 | 98.293 | 142.56 | 651.43 | 1499.6 | 1592.4 | 1 | 1 | 0 | 0 | 1 | 0 | 0 | 1 |
| TR162579|c0_g14|m.10765 | Ricinus communis | 40S ribosomal protein S7, putative | RCOM_1198120 | 179670 | 1667.7 | 689.17 | 1673.9 | 1669.7 | 4417.6 | 2908.1 | 1 | 1 | 0 | 0 | 0 | 0 | 0 | 0 |
| TR162587|c0_g4|m.47861 | Citrus maxima | Citrate synthase | CS | 48768 | 441.94 | 392.23 | 229.82 | 178.12 | 1083.8 | 2170.3 | 0 | 0 | -1 | 0 | 0 | -1 | 0 | 0 |
| TR162597|c1_g7|m.11394 | Ricinus communis | Putative uncharacterized protein | RCOM_1588080 | 19022 | 181.47 | 209.12 | 184.4 | 180.02 | 589.88 | 439.37 | 0 | 0 | 0 | 0 | 1 | 0 | 0 | 1 |
| TR162603|c2_g6|m.61279 | Ricinus communis | Nutrient reservoir, putative | RCOM_0787760 | 43417 | 228.38 | 52.409 | 26.753 | 18.305 | 1728.5 | 1284 | 0 | 0 | 0 | 1 | 1 | 0 | 1 | 1 |
| TR162609|c0_g5|m.35383 | Populus trichocarpa | Predicted protein | POPTRDRAFT_738467 | 809.29 |  | 61.28 | 80.658 |  |  |  | 0 | 0 | 0 | -1 | -1 | 0 | 0 | 0 |
| TR162627|c0_g13|m.15276 | Sesuvium portulacastrum | Phosphoenolpyruvate carboxylase | PEPC | 1905 |  |  |  |  |  |  | 0 | 0 | 0 | 0 | 0 | 0 | 0 | 0 |
| TR162642|c1_g2|m.54071 | Ricinus communis | Serine carboxypeptidase, putative | RCOM_1383830 | 4605 | 14.824 | 11.787 |  | 8.9114 | 75.793 | 70.383 | 0 | 0 | 0 | 1 | 1 | 0 | 1 | 1 |
| TR162650|c1_g5|m.22488 | Populus trichocarpa | Predicted protein | POPTRDRAFT_769062 | 1271.4 |  |  |  |  |  |  | 0 | 0 | 0 | 0 | 0 | 0 | 0 | 0 |
| TR162654|c1_g3|m.37585 | Vitis vinifera | Putative uncharacterized protein | VIT_00s0353g00060 | 3380 | 72.836 | 33.677 | 205.38 | 60.708 | 147.03 | 161.7 | 1 | 1 | 0 | 1 | 0 | 0 | 1 | 0 |
| TR162664|c0_g4|m.46251 | Ricinus communis | Delta3,5-delta2,4-dienoyl-CoA isomerase, mitochondrial, putative | RCOM_1078730 | 1691.3 |  |  |  | 6.2904 | 111.64 |  | 1 | 1 | 1 | 1 | 0 | 0 | 0 | 0 |
| TR163251|c2_g3|m.27908 | Ricinus communis | Cysteine protease, putative | RCOM_1589470 | 182550 | 4717.5 | 6314.4 | 3208.7 | 2279.8 | 909.76 | 714.47 | 0 | -1 | 0 | -1 | 0 | 0 | -1 | 0 |
| TR163284|c0_g2|m.7785 | Vitis vinifera | Putative uncharacterized protein | VIT_17s0000g08680 | 56889 | 547.9 | 814.22 | 278.58 | 145.16 | 305.31 | 300.63 | 0 | 0 | 0 | 0 | 0 | 0 | 0 | 0 |
| TR163287|c0_g5|m.16143 | Vitis vinifera | 3-isopropylmalate dehydrogenase | VIT_12s0034g01080 | 18505 | 287.58 | 215.09 | 148.81 | 58.951 | 799.81 | 663.74 | 0 | 0 | 0 | 1 | 1 | 0 | 1 | 1 |
| TR163291|c1_g7|m.30753 | Vitis vinifera | Pyruvate kinase | VIT_10s0071g01060 | 5984.6 |  |  | 60.972 | 40.645 | 460.61 |  | 1 | 1 | 1 | 1 | 1 | 0 | 0 | 1 |
| TR163301|c0_g5|m.25278 | Vitis vinifera | Putative uncharacterized protein | VIT_06s0004g07060 | 2457.1 | 21.359 | 71.703 | 43.652 | 12.966 |  | 45.331 | 0 | 0 | 0 | 0 | 0 | 0 | 0 | 0 |
| TR163302|c0_g1|m.20311 | Glycine max | Uncharacterized protein | Gma.55658 | 16980 | 388.19 | 371.53 | 405.03 | 145.2 | 492.6 | 358.01 | 0 | 0 | 0 | 0 | 0 | 0 | 0 | 0 |
| TR163304|c1_g3|m.36905 | Jatropha curcas | Glutathione S-transferase omega |  | 55295 | 351.31 | 754.45 | 206.8 |  | 1323.6 | 2053.8 | 0 | 0 | 0 | 0 | 0 | 0 | 0 | 0 |
| TR163304|c1_g7|m.51556 | Vitis vinifera | Putative uncharacterized protein | VIT_13s0067g03470 | 12199 | 101.45 | 109.59 | 64.996 |  |  |  | 0 | -1 | 0 | -1 | -1 | 0 | 0 | 0 |
| TR163318|c0_g5|m.10709 | Vitis vinifera | Putative uncharacterized protein | VIT_19s0027g01920 | 3155 | 49.436 | 45.001 | 16.783 |  | 171.78 | 211.67 | 0 | 0 | 0 | 1 | 0 | 0 | 1 | 0 |
| TR163321|c0_g2|m.55222 | Vitis vinifera | Putative uncharacterized protein | VIT_07s0031g00680 | 387.49 |  |  | 7.8744 |  |  |  | 0 | 0 | 1 | 0 | -1 | 0 | 0 | 0 |
| TR163321|c0_g5|m.38862 | Nicotiana tabacum | Putative red chlorophyll catabolite reductase |  | 41132 | 824.41 | 939.56 | 241.86 | 309.5 | 1305.1 | 1788.9 | 0 | 0 | -1 | 0 | 1 | -1 | 0 | 1 |
| TR163338|c0_g11|m.27289 | Brachypodium distachyon | Uncharacterized protein | BRADI3G26900 | 5583.6 | 27.831 |  | 56.161 |  | 165.32 |  | 1 | 1 | 0 | 0 | 0 | 0 | 0 | 0 |
| TR163338|c0_g9|m.43009 | Picea sitchensis | Putative uncharacterized protein |  | 881.62 |  |  | 9.7515 |  |  |  | 0 | 0 | 1 | 0 | -1 | 0 | 0 | 0 |
| TR163919|c0_g1|m.6777 | Ricinus communis | Sucrose phosphate syntase, putative | RCOM_0923320 | 6874.6 |  |  | 68.16 |  | 788.74 | 880.05 | 1 | 1 | 1 | 1 | 0 | 0 | 0 | 0 |
| TR163921|c0_g2|m.21524 | Populus trichocarpa | Predicted protein | POPTRDRAFT_652454 | 19980 | 160.58 | 156.52 | 237.05 | 169.64 | 170.13 | 506.51 | 1 | 1 | 0 | 0 | 0 | 0 | 0 | 0 |
| TR96294|c0_g5|m.11543 | Vitis vinifera | Putative uncharacterized protein | VIT_17s0000g04630 | 3567.8 | 11.508 |  | 77.681 | 31.703 |  | 156.23 | 1 | 1 | 0 | 0 | 0 | 0 | 0 | 0 |
| TR163960|c1_g21|m.1752 | Populus trichocarpa | Predicted protein | POPTRDRAFT_769549 | 26796 | 480.43 | 604.53 | 339.81 | 189.09 |  | 210.67 | 0 | -1 | 0 | 0 | 0 | 0 | 0 | 0 |
| TR84837|c0_g1|m.23179 | Blossfeldia liliputana | Photosystem II CP47 chlorophyll apoprotein (Fragment) | psbB | 1806200 | 22193 | 26378 | 14479 | 18913 | 73699 | 62238 | 0 | 0 | 0 | 1 | 1 | 0 | 1 | 1 |
| TR163961|c1_g1|m.51041 | Weingartia kargliana | 30S ribosomal protein S3, chloroplastic (Fragment) | rps3 | 556.87 |  |  |  |  | 467.96 |  | 0 | 0 | 0 | 1 | 1 | 0 | 0 | 0 |
| TR84837|c0_g1|m.23183 | Weingartia kargliana | 30S ribosomal protein S11 (Fragment) | rps11 | 5160.3 | 19.963 |  | 31.374 |  | 227.48 | 462.13 | 1 | 1 | 0 | 0 | 0 | 0 | 0 | 0 |
| TR84837|c0_g1|m.23184 | Blossfeldia liliputana | 30S ribosomal protein S8 (Fragment) | rps8 | 40018 | 727.77 | 745.93 | 535.55 | 362.04 | 1826.5 | 1117.7 | 0 | 0 | 0 | 0 | 0 | 0 | 0 | 0 |
| TR84837|c0_g1|m.23185 | Blossfeldia liliputana | 50S ribosomal protein L14, chloroplastic (Fragment) | rpl14 | 18118 | 243.76 | 574.94 | 43.643 | 91.292 | 760.84 | 130.46 | 0 | 0 | 0 | 0 | 0 | 0 | 0 | 0 |
| TR84837|c0_g1|m.23186 | Blossfeldia liliputana | 50S ribosomal protein L16, chloroplastic (Fragment) | rpl16 | 26301 | 464.87 | 493.52 | 422.43 |  |  |  | 0 | -1 | 0 | -1 | -1 | 0 | 0 | 0 |
| TR163965|c0_g1|m.56273 | Ricinus communis | Argininosuccinate synthase, putative | RCOM_0887890 | 11793 | 48.1 | 72.573 | 151.34 | 149.27 | 124.02 | 120.41 | 0 | 0 | 1 | 1 | 0 | 1 | 1 | 0 |
| TR163972|c0_g2|m.8285 | Vitis vinifera | Putative uncharacterized protein | VIT_04s0008g03620 | 2203.9 | 49.962 | 84.513 | 31.324 | 31.323 |  | 86.298 | 0 | 0 | 0 | 0 | 1 | 0 | 0 | 1 |
| TR163977|c2_g1|m.25156 |  |  |  | 424.6 |  | 8.673 | 6.1535 | 12.316 | 16.895 |  | 1 | 1 | 0 | 0 | 0 | 0 | 0 | 0 |
| TR163986|c1_g2|m.51099 | Brachypodium distachyon | Uncharacterized protein | BRADI4G08720 | 3712.3 |  |  | 60.775 | 35.961 | 120.44 |  | 1 | 1 | 1 | 1 | 0 | 0 | 0 | 0 |
| TR163997|c0_g10|m.7548 | Glycine max | Uncharacterized protein |  | 8305.5 |  |  |  |  |  |  | 0 | 0 | 0 | 0 | 0 | 0 | 0 | 0 |
| TR163997|c0_g6|m.14981 | Populus trichocarpa | Predicted protein | POPTRDRAFT_904513 | 15755 | 854.59 | 1049 |  |  |  |  | 0 | 0 | -1 | -1 | 0 | 0 | 0 | 0 |
| TR164008|c0_g3|m.20396 | Ricinus communis | Alpha-glucosidase, putative | RCOM_0030540 | 29199 | 711.6 | 384.91 | 149.9 | 177.09 | 731.6 | 456.9 | 0 | 0 | 0 | 0 | 0 | 0 | 0 | 0 |
| TR164165|c0_g3|m.48810 | Populus trichocarpa | Predicted protein | POPTRDRAFT_641114 | 18813 | 172.87 | 486.75 | 36.67 | 133.73 | 380.84 | 688.45 | 0 | 0 | 0 | 0 | 0 | 0 | 0 | 0 |
| TR164174|c0_g2|m.39726 | Vitis vinifera | Putative uncharacterized protein | VIT_01s0011g04900 | 22476 | 125.9 | 144.51 | 29.144 | 37.115 | 676.89 | 239.97 | 0 | 0 | -1 | 0 | 0 | -1 | 0 | 0 |
| TR164187|c0_g1|m.48960 | Populus trichocarpa | Predicted protein | POPTRDRAFT_731296 | 7716.2 | 426.67 |  | 297.05 | 89.702 |  |  | 0 | -1 | 0 | -1 | -1 | 0 | 0 | 0 |
| TR164187|c0_g4|m.61327 | Populus trichocarpa | Predicted protein | POPTRDRAFT_731296 | 19670 | 290.25 | 198.43 | 286.53 | 371.07 |  | 459.36 | 1 | 1 | 0 | 0 | 0 | 0 | 0 | 0 |
| TR164251|c4_g3|m.18591 | Arabidopsis thaliana | Aromatic aldehyde synthase | AAS | 364.31 |  |  |  |  |  |  | 0 | 0 | 0 | 0 | 0 | 0 | 0 | 0 |
| TR164255|c0_g12|m.46007 | Solanum tuberosum | Allene oxide synthase | aos2 | 2219.1 |  | 36.147 | 65.319 | 60.892 |  |  | 0 | 0 | 0 | -1 | -1 | 0 | 0 | 0 |
| TR164257|c1_g2|m.35804 | Vitis vinifera | Putative uncharacterized protein | VIT_00s0555g00020 | 1192.6 | 29.443 |  |  |  |  | 65.846 | 0 | 0 | -1 | 0 | 1 | 0 | 0 | 0 |
| TR164258|c1_g24|m.33693 | Nicotiana tabacum | Proteasome subunit beta type | b2 | 12729 | 159.16 | 215.04 | 199.66 | 154.56 | 374.71 | 384 | 0 | 0 | 0 | 1 | 1 | 0 | 1 | 1 |
| TR164258|c2_g9|m.43877 | Vitis vinifera | Proteasome subunit beta type | VIT_01s0137g00420 | 8257.3 | 167.84 |  | 149.59 |  |  |  | 0 | -1 | 0 | -1 | -1 | 0 | 0 | 0 |
| TR164441|c0_g2|m.42906 | Ricinus communis | Histidyl-tRNA synthetase, putative | RCOM_0741740 | 5048.2 | 11.259 | 65.536 | 53.47 | 10.995 | 219.41 | 165.61 | 0 | 0 | 0 | 0 | 1 | 0 | 0 | 1 |
| TR164462|c0_g3|m.27686 | Vitis vinifera | Putative uncharacterized protein | VIT_02s0012g02050 | 5620.4 | 57.861 | 68.296 | 59.087 | 82.196 | 161.95 |  | 1 | 1 | 0 | 0 | 0 | 0 | 0 | 0 |
| TR164477|c0_g3|m.27763 | Glycine max | Uncharacterized protein |  | 30741 | 374.59 | 480.17 | 215.9 | 141.85 | 526.75 | 850.3 | 0 | 0 | 0 | 0 | 0 | 0 | 0 | 0 |
| TR164497|c1_g8|m.30828 | Arabidopsis thaliana | Putative uncharacterized protein |  | 488.03 |  | 169.09 |  |  |  |  | 0 | 0 | -1 | -1 | 0 | 0 | 0 | 0 |
| TR164498|c0_g3|m.27216 | Vitis vinifera | Phospholipase D | VIT_00s0264g00100 | 3422.2 | 102.48 | 23.71 | 218.1 | 28.967 | 37.33 | 81.137 | 0 | 0 | 0 | 0 | 0 | 0 | 0 | 0 |
| TR164500|c0_g2|m.19535 | Ricinus communis | Argininosuccinate synthase, putative | RCOM_0887890 | 3601.6 |  |  | 6.3381 | 31.541 |  | 196.45 | 1 | 1 | 1 | 1 | 0 | 0 | 0 | 0 |
| TR164509|c0_g13|m.7698 | Glycine max | Uncharacterized protein |  | 608420 | 8858.8 | 9962.3 | 4831.6 | 4315.6 | 11923 | 11039 | 0 | 0 | -1 | 0 | 1 | -1 | 0 | 1 |
| TR164509|c0_g2|m.11083 | Silene latifolia | V-type proton ATPase catalytic subunit A (Fragment) |  | 14583 | 35.413 | 89.845 | 67.412 | 29.356 | 244.92 | 312.42 | 0 | 0 | 0 | 1 | 1 | 0 | 1 | 1 |
| TR164514|c0_g18|m.16743 | Daucus carota | Protein disulfide isomerase 1 | PDI1 | 9435.6 |  |  | 297.29 | 272.66 |  |  | 0 | 0 | 1 | 0 | -1 | 0 | 0 | 0 |
| TR164514|c0_g6|m.15982 | Glycine max | Uncharacterized protein |  | 1903.3 |  |  | 60.96 | 77.033 |  | 100.63 | 1 | 1 | 1 | 1 | 0 | 0 | 0 | 0 |
| TR164528|c1_g9|m.48489 | Ricinus communis | Glycine-rich RNA-binding protein, putative | RCOM_0523760 | 138670 | 1816.9 | 2220 | 1302.9 | 1307.7 | 2676.6 | 1971.1 | 0 | 0 | 0 | 0 | 0 | 0 | 0 | 0 |
| TR164529|c1_g14|m.62645 | Vitis vinifera | Putative uncharacterized protein | VIT_18s0001g11100 | 45061 | 259.27 | 1691.5 | 1364.6 | 840.23 |  |  | 0 | 0 | 0 | -1 | -1 | 0 | 0 | 0 |
| TR164529|c1_g22|m.27380 | Vitis vinifera | Putative uncharacterized protein | VIT_18s0001g11100 | 49282 | 1486.7 | 1626.3 | 649.05 | 461.63 | 320.34 | 294.26 | 0 | -1 | -1 | -1 | 0 | -1 | -1 | 0 |
| TR164529|c1_g24|m.10173 | Glycine max | Uncharacterized protein (Fragment) |  | 11818 | 546 | 730.44 | 460.81 |  |  |  | 0 | -1 | 0 | -1 | -1 | 0 | 0 | 0 |
| TR164532|c0_g5|m.53145 | Vitis vinifera | Putative uncharacterized protein | VIT_02s0025g01170 | 2429.6 |  | 9.4217 | 65.732 | 51.955 | 54.39 | 43.638 | 0 | 0 | 0 | 0 | 0 | 0 | 0 | 0 |
| TR164615|c1_g2|m.32432 | Glycine max | Uncharacterized protein | Gma.18173 | 2249.8 |  |  | 38.412 | 81.721 |  | 122.66 | 1 | 1 | 1 | 1 | 0 | 0 | 0 | 0 |
| TR164625|c0_g2|m.11059 | Mesembryanthemum crystallinum | Glutamine synthetase |  | 57038 | 997.58 | 1054.5 | 351.19 | 228.7 | 1355.1 | 1147.9 | 0 | 0 | -1 | 0 | 1 | -1 | 0 | 1 |
| TR164659|c0_g4|m.32794 | Mesembryanthemum crystallinum | Calcium ATPase (Fragment) |  | 667.04 | 6.4929 |  |  |  |  |  | 0 | 0 | -1 | -1 | 0 | 0 | 0 | 0 |
| TR164679|c1_g2|m.38596 | Vitis vinifera | Putative uncharacterized protein | VIT_07s0005g03640 | 4308.1 | 130.64 | 101.82 | 130.19 | 106.96 | 97.807 |  | 0 | 0 | 0 | 0 | 0 | 0 | 0 | 0 |
| TR164706|c0_g1|m.51871 | Populus trichocarpa | Predicted protein | POPTRDRAFT_594991 | 278.72 |  |  |  | 12.154 |  | 31.867 | 1 | 1 | 1 | 1 | 0 | 0 | 0 | 0 |
| TR16476|c0_g1|m.26743 | Lotus japonicus | Uncharacterized protein |  | 2588.6 |  | 75.397 | 35.039 | 42.864 |  |  | 0 | -1 | 0 | -1 | -1 | 0 | 0 | 0 |
| TR16477|c0_g1|m.26068 | Glycine max | Uncharacterized protein | Gma.14945 | 39923 | 282.56 | 407.11 | 265.07 | 51.475 | 1590.1 | 1534.5 | 0 | 0 | 0 | 1 | 1 | 0 | 1 | 1 |
| TR164827|c0_g6|m.12054 | Medicago truncatula | 60S ribosomal protein L13 | MTR_7g111590 | 630.57 |  |  |  |  |  |  | 0 | 0 | 0 | 0 | 0 | 0 | 0 | 0 |
| TR164830|c0_g2|m.39791 | Populus trichocarpa | Predicted protein | POPTRDRAFT_566429 | 14774 | 49.777 | 42.266 | 91.165 | 98.743 | 735.95 | 437.14 | 1 | 1 | 1 | 0 | 0 | 1 | 0 | 0 |
| TR164860|c1_g4|m.44886 | Beta vulgaris | Fructokinase |  | 8616.1 |  |  |  |  |  | 469.5 | 0 | 0 | 0 | 1 | 1 | 0 | 0 | 0 |
| TR95559|c1_g8|m.48123 | Silene latifolia | Ribosomal protein (Fragment) |  | 21799 | 338.5 | 177.07 | 202.02 | 582.86 | 372.37 | 363.77 | 1 | 1 | 0 | 0 | 0 | 0 | 0 | 0 |
| TR164874|c3_g1|m.11118 | Vitis vinifera | Putative uncharacterized protein | VIT_18s0001g02510 | 21981 | 881.34 | 506.82 | 152.68 | 157.03 | 269.36 | 187.66 | 0 | 0 | 0 | 0 | 0 | 0 | 0 | 0 |
| TR164875|c0_g4|m.27275 | Ricinus communis | Putative uncharacterized protein | RCOM_0503680 | 17051 | 154.86 | 201.48 | 167.17 | 85.516 | 267.65 | 356.08 | 0 | 0 | 0 | 0 | 0 | 0 | 0 | 0 |
| TR164879|c1_g1|m.55185 | Vitis vinifera | Putative uncharacterized protein | VIT_08s0007g04670 | 1409.6 |  |  |  | 10.939 |  | 54.267 | 1 | 1 | 1 | 1 | 0 | 0 | 0 | 0 |
| TR164887|c0_g3|m.52501 | Vitis vinifera | Putative uncharacterized protein | VIT_05s0049g00180 | 8833 |  |  | 69.256 | 51.82 |  |  | 0 | 0 | 1 | 0 | -1 | 0 | 0 | 0 |
| TR164889|c1_g3|m.9889 | Vitis vinifera | Putative uncharacterized protein | VIT_19s0014g01330 | 3634.8 |  | 47.713 | 44.8 | 17.931 | 20.715 | 24.068 | 0 | -1 | 0 | 0 | 0 | 0 | 0 | 0 |
| TR164892|c0_g1|m.57110 | Vitis vinifera | Putative uncharacterized protein | VIT_13s0067g00270 | 61763 | 725.2 | 688.63 | 1175.8 | 1248.6 | 913.49 | 704.46 | 0 | 0 | 1 | 0 | 0 | 1 | 0 | 0 |
| TR26413|c0_g4|m.51480 |  |  |  | 410580 | 3455.9 | 5291.1 | 5001.3 | 5317.2 | 2464.3 | 14395 | 1 | 1 | 0 | 0 | 0 | 0 | 0 | 0 |
| TR70799|c0_g1|m.40830 | Vitis pseudoreticulata | SGT1 |  | 1411.5 | 69.913 |  |  |  | 68.351 | 109.15 | 0 | 0 | -1 | 0 | 1 | 0 | 0 | 0 |
| TR16573|c0_g1|m.10192 | Medicago truncatula | Oxoglutarate dehydrogenase-like protein | MTR_7g023770 | 15861 | 22.306 |  |  | 89.761 | 1053.5 | 1345.9 | 1 | 1 | 0 | 0 | 0 | 0 | 0 | 0 |
| TR16606|c0_g2|m.37558 | Vitis vinifera | Putative uncharacterized protein | VIT_06s0080g00940 | 15415 |  |  | 148.73 |  |  |  | 0 | 0 | 1 | 0 | -1 | 0 | 0 | 0 |
| TR3118|c0_g1|m.12562 | Glycine max | Uncharacterized protein | Gma.55247 | 2760.5 |  | 25.691 | 255.43 | 237.91 | 23.257 |  | 0 | 0 | 1 | 0 | -1 | 1 | 0 | -1 |
| TR65684|c0_g1|m.19125 | Carica papaya | Translation initiation factor |  | 110610 | 1849.1 | 2365.7 | 1635.9 | 1556.7 | 2290 | 1335.5 | 0 | 0 | 0 | 0 | 0 | 0 | 0 | 0 |
| TR16801|c0_g2|m.49997 | Vitis vinifera | Putative uncharacterized protein | VIT_18s0089g01270 | 12373 |  | 7.8907 |  |  |  |  | 0 | 0 | -1 | -1 | 0 | 0 | 0 | 0 |
| TR80670|c2_g1|m.9792 | Medicago truncatula | ADP-ribosylation factor | MTR_6g005820 | 175040 | 1800.3 | 1426.2 | 940.4 | 785.79 | 6521.3 | 3061.2 | 0 | 0 | 0 | 0 | 0 | 0 | 0 | 0 |
| TR16809|c1_g2|m.3425 | Hevea brasiliensis | Thioredoxin |  | 7489.7 | 257.37 | 303.83 | 166.06 | 142.72 |  |  | 0 | -1 | -1 | -1 | -1 | -1 | 0 | 0 |
| TR4126|c0_g1|m.4213 | Vitis vinifera | Putative uncharacterized protein | VIT_01s0010g00680 | 15792 | 145.62 | 224.02 | 74.056 | 68.161 | 247.48 | 289.56 | 0 | 0 | 0 | 0 | 1 | 0 | 0 | 1 |
| TR75547|c0_g1|m.24216 | Glycine max | Uncharacterized protein |  | 283840 | 4021.3 | 4651.9 | 3308.8 | 1661.7 | 6922.6 | 7043.8 | 0 | 0 | 0 | 1 | 1 | 0 | 1 | 1 |
| TR46320|c0_g1|m.16137 | Ricinus communis | Peptidyl-prolyl cis-trans isomerase d, ppid, putative | RCOM_0774220 | 889.77 |  | 59.812 |  |  |  | 157.98 | 0 | 0 | -1 | 0 | 1 | 0 | 0 | 0 |
| TR2005|c0_g1|m.41185 | Ricinus communis | Plastocyanin A, chloroplast, putative | RCOM_1599580 | 2355900 | 30676 | 37201 | 16770 | 13917 | 93199 | 80404 | 0 | 0 | -1 | 1 | 1 | -1 | 1 | 1 |
| TR17122|c0_g1|m.5433 | Vitis vinifera | Putative uncharacterized protein | VIT_01s0011g00160 | 3409 | 158.07 | 216.46 | 172.43 | 116.23 | 42.109 |  | 0 | -1 | 0 | 0 | 0 | 0 | 0 | 0 |
| TR60052|c0_g3|m.27032 | Vitis vinifera | Putative uncharacterized protein | VIT_17s0000g05680 | 21349 | 46.249 | 123.67 | 68.284 | 140.22 |  | 2154.3 | 1 | 1 | 0 | 1 | 1 | 0 | 1 | 1 |
| TR32011|c0_g2|m.51050 | Arabidopsis lyrata | Os01g0254000 | ARALYDRAFT_912020 | 3709 |  |  |  | 73.589 |  |  | 0 | 0 | 1 | 0 | -1 | 0 | 0 | 0 |
| TR17784|c0_g1|m.32238 | Mesembryanthemum crystallinum | Monodehydroascorbate reductase | mdhar1 | 5048.6 | 70.015 |  | 182.38 | 193.78 | 61.709 |  | 0 | 0 | 0 | 0 | -1 | 0 | 0 | -1 |
| TR29827|c0_g3|m.31246 | Lotus japonicus | Uncharacterized protein |  | 4579.1 |  |  | 32.365 | 89.051 | 208.2 | 180.74 | 1 | 1 | 1 | 1 | 0 | 0 | 0 | 0 |
| TR17799|c2_g4|m.5767 | Camellia sinensis | 40S ribosomal protein s10 |  | 54386 |  | 291.6 | 58.953 | 277.17 | 1728.8 | 619.64 | 0 | 0 | 0 | 0 | 0 | 0 | 0 | 0 |
| TR17821|c0_g2|m.20125 | Vitis vinifera | Putative uncharacterized protein | VIT_15s0021g02050 | 487.38 |  |  | 27.547 |  |  |  | 0 | 0 | 1 | 0 | -1 | 0 | 0 | 0 |
| TR17827|c0_g1|m.42053 | Vitis vinifera | Putative uncharacterized protein | VIT_13s0019g02360 | 1514.9 |  |  |  |  |  |  | 0 | 0 | 0 | 0 | 0 | 0 | 0 | 0 |
| TR17835|c0_g2|m.54913 | Ricinus communis | Putative uncharacterized protein | RCOM_0899170 | 27529 | 98.365 | 442.28 | 85.442 | 95.77 | 984.07 | 147.25 | 0 | 0 | 0 | 0 | 0 | 0 | 0 | 0 |
| TR46299|c0_g1|m.50648 | Zea mays | 40S ribosomal protein S25-1 |  | 5353.6 |  |  |  |  |  |  | 0 | 0 | 0 | 0 | 0 | 0 | 0 | 0 |
| TR46503|c0_g1|m.16928 | Vitis vinifera | Putative uncharacterized protein | VIT_14s0083g01010 | 3238.1 | 88.517 | 47.6 |  | 39.523 | 243.09 | 187.35 | 0 | 0 | 0 | 0 | 0 | 0 | 0 | 0 |
| TR17929|c2_g4|m.42566 | Eustoma exaltatum | Actin | EgACT | 846.21 |  |  |  |  |  |  | 0 | 0 | 0 | 0 | 0 | 0 | 0 | 0 |
| TR17929|c4_g1|m.31845 | Brassica napus | Actin (Fragment) |  | 55939 | 153.5 | 484.77 | 598.6 | 571.6 | 3347.7 | 1228.2 | 1 | 1 | 0 | 0 | 0 | 0 | 0 | 0 |
| TR17929|c5_g4|m.17816 | Arabidopsis lyrata | Putative uncharacterized protein | ARALYDRAFT_487803 | 1925.3 |  |  | 28.786 | 19.49 |  |  | 0 | 0 | 1 | 0 | -1 | 0 | 0 | 0 |
| TR17941|c0_g5|m.48067 | Silene diclinis | Putative spermidine synthase (Fragment) | XSS | 34554 | 674.24 | 593.54 | 400.4 | 171.87 | 387.01 | 662.88 | 0 | 0 | 0 | 0 | 0 | 0 | 0 | 0 |
| TR17955|c0_g3|m.55366 | Populus trichocarpa | Ferritin | POPTRDRAFT_825375 | 7826.5 |  |  | 613.2 | 43.418 |  |  | 0 | 0 | 1 | 0 | -1 | 0 | 0 | 0 |
| TR52658|c0_g1|m.22752 | Nicotiana tabacum | Ubiquitin activating enzyme 2 |  | 481.82 |  |  |  |  |  |  | 0 | 0 | 0 | 0 | 0 | 0 | 0 | 0 |
| TR33465|c0_g1|m.22973 | Vitis vinifera | Putative uncharacterized protein | VIT_14s0060g00850 | 10191 | 119.23 | 266.95 |  | 40.902 | 467.16 | 491.11 | 0 | 0 | 0 | 0 | 1 | 0 | 0 | 1 |
| TR27628|c0_g1|m.32306 | Glycine max | Uncharacterized protein | Gma.518 | 9347.6 | 74.372 | 79.488 | 33.778 | 82.235 | 212.68 | 138.48 | 0 | 0 | 0 | 0 | 0 | 0 | 0 | 0 |
| TR20001|c0_g2|m.16455 | Ricinus communis | Xylem serine proteinase 1, putative | RCOM_1588040 | 636.78 |  | 114.79 | 36.177 |  |  |  | 0 | -1 | 0 | -1 | -1 | 0 | 0 | 0 |
| TR64213|c0_g1|m.45684 | Vitis vinifera | Putative uncharacterized protein | VIT_10s0003g00890 | 10378 | 174.72 | 153.23 | 40.717 | 35.012 | 605.22 | 116.29 | 0 | 0 | -1 | 0 | 0 | -1 | 0 | 0 |
| TR2037|c0_g1|m.10889 | Glycine max | Uncharacterized protein | Gma.55638 | 2620.2 | 167.62 |  |  |  |  |  | 0 | 0 | -1 | -1 | 0 | 0 | 0 | 0 |
| TR20499|c0_g1|m.41069 | Phytolacca acinosa | rRNA N-glycosidase (Fragment) | papa2 | 64680 | 228.64 | 377.45 |  |  | 1640.1 | 861.61 | 0 | 0 | -1 | 0 | 1 | 0 | 0 | 0 |
| TR21501|c0_g1|m.22117 | Mesembryanthemum crystallinum | Fructose-bisphosphate aldolase |  | 512.07 |  |  |  |  |  |  | 0 | 0 | 0 | 0 | 0 | 0 | 0 | 0 |
| TR22160|c0_g1|m.17260 | Medicago truncatula | Monothiol glutaredoxin-S16 | MTR_4g016930 | 13214 | 81.885 | 97.543 | 101.68 | 60.876 | 297.39 | 129.84 | 0 | 0 | 0 | 0 | 0 | 0 | 0 | 0 |
| TR22170|c0_g1|m.20208 | Glycine max | Uncharacterized protein | Gma.21048 | 5330.2 | 195.19 |  |  |  | 269.95 | 180.25 | 0 | 0 | -1 | 0 | 1 | 0 | 0 | 0 |
| TR43258|c0_g1|m.390 | Dimocarpus longan | 14-3-3 protein |  | 65996 | 1239.4 | 1219.8 | 955.39 | 1141.9 | 1009.4 | 789.36 | 0 | -1 | 0 | 0 | 0 | 0 | 0 | 0 |
| TR22220|c0_g1|m.61322 | Atriplex canescens | Short chain alcohol dehydrogenase-like protein |  | 454.55 |  |  |  |  |  |  | 0 | 0 | 0 | 0 | 0 | 0 | 0 | 0 |
| TR22309|c0_g1|m.53440 | Vitis vinifera | Putative uncharacterized protein | VIT_09s0018g01610 | 242.96 |  | 58.21 |  | 8.6744 |  |  | 0 | -1 | 0 | -1 | -1 | 0 | 0 | 0 |
| TR22681|c0_g1|m.61931 | Phytolacca acinosa | rRNA N-glycosidase |  | 63282 | 312.28 | 310 | 37.765 |  | 3133 | 3009.4 | 0 | 0 | -1 | 1 | 1 | -1 | 1 | 1 |
| TR22770|c0_g1|m.57424 | Ferocactus wislizeni | Chloroplast small heat shock protein | shSP | 120370 | 319.12 | 267.61 | 226.17 | 183.04 | 1976.7 | 808.43 | 0 | 0 | 0 | 0 | 0 | 0 | 0 | 0 |
| TR22826|c0_g2|m.3901 | Glycine max | Uncharacterized protein |  | 6158.9 |  | 89.268 |  |  |  |  | 0 | 0 | -1 | -1 | 0 | 0 | 0 | 0 |
| TR39702|c0_g1|m.25565 | Populus trichocarpa | Predicted protein | POPTRDRAFT_649730 | 76100 | 27.592 |  | 277.54 |  |  | 82.777 | 0 | 0 | 0 | 0 | 0 | 0 | 0 | 0 |
| TR22891|c0_g1|m.5477 |  |  |  | 3470.4 |  |  | 38.507 | 92.481 |  |  | 0 | 0 | 1 | 0 | -1 | 0 | 0 | 0 |
| TR51209|c0_g1|m.29465 | Populus trichocarpa | Predicted protein | POPTRDRAFT_817694 | 406.29 |  |  |  |  |  |  | 0 | 0 | 0 | 0 | 0 | 0 | 0 | 0 |
| TR71728|c1_g2|m.37419 | Arabidopsis thaliana | Signal recognition particle 9 kDa protein | At3g49100 | 393.49 |  |  |  |  |  |  | 0 | 0 | 0 | 0 | 0 | 0 | 0 | 0 |
| TR2501|c0_g1|m.50288 | Arabidopsis thaliana | Putative uncharacterized protein AT4g02360 | T14P8.17 | 17371 | 421.67 | 137.71 | 226.34 | 92.62 | 224.21 | 165.11 | 0 | 0 | 0 | 0 | 0 | 0 | 0 | 0 |
| TR2513|c1_g1|m.12653 | Ricinus communis | Serine-threonine protein kinase, plant-type, putative | RCOM_0404940 | 6029.1 | 54.749 | 140.66 | 64.271 | 172 |  |  | 0 | 0 | 0 | -1 | -1 | 0 | 0 | 0 |
| TR25230|c0_g1|m.20492 | Ricinus communis | Mitochondrial oxoglutarate/malate carrier protein, putative | RCOM_1361330 | 13678 | 235.46 |  | 30.2 | 16.9 | 547.3 | 555.2 | 0 | 0 | -1 | 1 | 1 | -1 | 1 | 1 |
| TR25241|c0_g1|m.2099 | Ricinus communis | 2-deoxyglucose-6-phosphate phosphatase, putative | RCOM_1435490 | 446.68 |  |  |  |  |  |  | 0 | 0 | 0 | 0 | 0 | 0 | 0 | 0 |
| TR99654|c0_g2|m.21825 | Vitis vinifera | Putative uncharacterized protein | VITISV_000979 | 306.52 | 17.047 |  | 13.135 | 23.686 |  |  | 0 | 0 | 0 | -1 | -1 | 0 | 0 | 0 |
| TR25275|c0_g2|m.47658 | Medicago truncatula | 22.7 kDa class IV heat shock protein | MTR_7g034910 | 14541 | 28.036 | 29.09 |  |  | 219.04 |  | 0 | 0 | -1 | 1 | 1 | 0 | 1 | 0 |
| TR35807|c0_g1|m.7796 | Jatropha curcas | Universal stress protein |  | 114470 | 404.51 | 596.76 | 471.79 | 99.079 | 4361.9 | 3685.7 | 0 | 0 | 0 | 1 | 1 | 0 | 1 | 1 |
| TR25296|c0_g1|m.46825 | Vitis vinifera | Putative uncharacterized protein | VIT_12s0057g01060 | 291.7 |  |  | 22.967 | 17.117 |  |  | 0 | 0 | 1 | 0 | -1 | 0 | 0 | 0 |
| TR25301|c1_g1|m.23718 | Glycine max | Uncharacterized protein | Gma.10737 | 64040 | 167.55 | 151.94 | 337.02 | 330.74 | 2847.4 | 1827.9 | 1 | 1 | 1 | 0 | 0 | 1 | 0 | 0 |
| TR25301|c1_g3|m.43506 | Vitis vinifera | Putative uncharacterized protein | VIT_05s0020g03900 | 57420 | 618.71 | 430.03 |  | 18.048 | 2346.9 | 2905.1 | 0 | 0 | 0 | 1 | 0 | 0 | 1 | 0 |
| TR60309|c0_g5|m.7271 | Nicotiana benthamiana | Eukaryotic initiation factor 4A-14 |  | 15214 | 85.082 | 113.98 | 57.125 | 51.563 | 300.68 | 296.98 | 0 | 0 | 0 | 1 | 1 | 0 | 1 | 1 |
| TR25318|c0_g3|m.58687 | Vitis vinifera | Putative uncharacterized protein | VIT_18s0001g06720 | 5340.8 | 95.444 | 129.54 | 87.518 | 80.728 | 140.96 |  | 0 | 0 | 0 | 0 | 0 | 0 | 0 | 0 |
| TR2533|c0_g5|m.30791 | Beta vulgaris | Dienelactone hydrolase-1 | DieH1 | 882.49 |  |  |  |  |  |  | 0 | 0 | 0 | 0 | 0 | 0 | 0 | 0 |
| TR2535|c0_g3|m.12733 | Rumex obtusifolius | Putative glycine rich protein | grp | 1965.7 |  |  | 17.569 |  |  |  | 0 | 0 | 1 | 0 | -1 | 0 | 0 | 0 |
| TR41900|c1_g2|m.22742 | Lotus japonicus | Uncharacterized protein |  | 31089 | 248.73 | 339.03 | 220.38 | 120.8 | 1143.3 | 1048.2 | 0 | 0 | 0 | 1 | 1 | 0 | 1 | 1 |
| TR25377|c0_g1|m.3524 | Arabidopsis lyrata | Putative uncharacterized protein | ARALYDRAFT_494916 | 80871 | 136.8 | 114.23 | 173.3 | 264.94 | 213.33 | 69.044 | 0 | 0 | 0 | 0 | 0 | 0 | 0 | 0 |
| TR25384|c0_g3|m.39612 | Vitis vinifera | Putative uncharacterized protein | VIT_11s0065g00030 | 1645.4 |  |  |  |  |  |  | 0 | 0 | 0 | 0 | 0 | 0 | 0 | 0 |
| TR25414|c0_g1|m.51373 | Vitis vinifera | Putative uncharacterized protein | VIT_05s0020g04440 | 1433.9 | 29.351 | 33.227 | 17.872 |  |  |  | 0 | -1 | 0 | -1 | -1 | 0 | 0 | 0 |
| TR25447|c0_g1|m.23562 | Nicotiana tabacum | Ubiquitin activating enzyme 2 |  | 2645.4 |  |  | 108.81 | 28.036 |  | 106.87 | 1 | 1 | 1 | 1 | 0 | 0 | 0 | 0 |
| TR25450|c0_g2|m.52992 | Vitis vinifera | Putative uncharacterized protein | VIT_18s0001g02510 | 5877.4 | 207.41 | 218.12 | 102.44 | 70.014 |  | 12.771 | 0 | -1 | -1 | -1 | 0 | -1 | -1 | 0 |
| TR25482|c0_g1|m.191 | Vitis vinifera | Putative uncharacterized protein | VIT_14s0060g02350 | 1536 |  | 50.561 |  |  |  |  | 0 | 0 | -1 | -1 | 0 | 0 | 0 | 0 |
| TR704|c0_g1|m.31420 | Vigna unguiculata | Type IIIa membrane protein cp-wap11 |  | 9054.1 |  | 305.91 | 197.29 | 134.01 | 443.13 | 454.84 | 0 | 0 | 0 | 0 | 1 | 0 | 0 | 1 |
| TR25644|c1_g1|m.53966 | Populus trichocarpa | Predicted protein | POPTRDRAFT_559074 | 939.75 |  |  |  |  |  |  | 0 | 0 | 0 | 0 | 0 | 0 | 0 | 0 |
| TR64087|c1_g1|m.11994 | Populus trichocarpa | Ribosomal protein L15 | POPTRDRAFT_709743 | 12205 |  | 97.901 |  | 92.434 |  | 418.54 | 0 | 0 | 0 | 0 | 0 | 0 | 0 | 0 |
| TR53969|c0_g1|m.51876 | Ricinus communis | Cytochrome-c oxidase, putative | RCOM_0338910 | 986.46 |  |  |  |  |  |  | 0 | 0 | 0 | 0 | 0 | 0 | 0 | 0 |
| TR2570|c0_g1|m.51785 | Populus trichocarpa | Predicted protein | POPTRDRAFT_708845 | 822.94 |  |  |  |  | 107.78 | 232.98 | 0 | 0 | 0 | 1 | 1 | 0 | 0 | 0 |
| TR25715|c1_g1|m.55002 | Picea sitchensis | Putative uncharacterized protein |  | 54974 | 690.43 | 901.28 | 209.47 | 134.65 | 671.33 | 1515.3 | 0 | 0 | -1 | 0 | 0 | -1 | 0 | 0 |
| TR25926|c0_g1|m.53269 | Hevea brasiliensis | Heat-shock protein 70 | HSP70 | 108.04 |  |  |  |  |  |  | 0 | 0 | 0 | 0 | 0 | 0 | 0 | 0 |
| TR27982|c1_g1|m.8663 | Ricinus communis | Putative uncharacterized protein | RCOM_1439020 | 11235 | 220.15 | 74.052 | 22.164 | 75.814 | 381.85 | 161.76 | 0 | 0 | 0 | 0 | 0 | 0 | 0 | 0 |
| TR26398|c0_g1|m.37937 | Ricinus communis | Isochorismatase, putative | RCOM_0986590 | 6445.2 |  | 40.383 | 8.0156 | 48.951 | 188.69 | 76.904 | 0 | 0 | 0 | 0 | 0 | 0 | 0 | 0 |
| TR26420|c0_g5|m.11698 | Glycine max | Uncharacterized protein | Gma.17933 | 2669.8 |  |  |  |  |  | 685.76 | 0 | 0 | 0 | 1 | 1 | 0 | 0 | 0 |
| TR50322|c0_g2|m.7549 | Vitis vinifera | V-type proton ATPase subunit F | VIT_05s0062g00210 | 6335 | 112.92 |  |  |  | 219.95 | 247.33 | 0 | 0 | -1 | 0 | 1 | 0 | 0 | 0 |
| TR26587|c0_g1|m.30113 | Vitis vinifera | Putative uncharacterized protein | VIT_02s0012g01120 | 38196 | 586.19 | 665.84 | 302.78 | 449.88 |  |  | 0 | -1 | 0 | -1 | -1 | 0 | 0 | 0 |
| TR2686|c0_g1|m.50833 | Gossypium hirsutum | Major latex-like protein |  | 294.09 | 182.83 |  |  |  |  |  | 0 | 0 | -1 | -1 | 0 | 0 | 0 | 0 |
| TR26882|c0_g1|m.33219 | Vitis vinifera | Putative uncharacterized protein | VIT_14s0108g01160 | 12649 | 145.93 | 217.41 | 578.19 | 479.46 | 18.887 | 198.91 | 0 | 0 | 1 | 0 | 0 | 1 | 0 | 0 |
| TR45080|c0_g2|m.35153 | Medicago truncatula | Homeodomain-related | MtrDRAFT_AC148762g4v2 | 20306 | 4193.4 |  |  |  |  |  | 0 | 0 | -1 | -1 | 0 | 0 | 0 | 0 |
| TR26918|c0_g1|m.17830 | Glycine max | Uncharacterized protein | Gma.25401 | 887.54 | 70.011 |  | 47.705 | 80.851 |  |  | 0 | -1 | 0 | -1 | -1 | 0 | 0 | 0 |
| TR2701|c0_g1|m.32265 | Vitis vinifera | Putative uncharacterized protein | VITISV_037939 | 3079.1 |  |  |  |  |  |  | 0 | 0 | 0 | 0 | 0 | 0 | 0 | 0 |
| TR2705|c1_g2|m.14440 | Silene noctiflora | 50S ribosomal protein L22, chloroplastic | rpl22 | 3780.4 |  |  | 49.585 |  | 96.799 |  | 1 | 1 | 1 | 1 | 0 | 0 | 0 | 0 |
| TR2708|c0_g1|m.18926 | Ricinus communis | Uv excision repair protein rad23, putative | RCOM_1725680 | 3914 | 184.22 | 85.14 | 212.77 | 67.267 |  |  | 0 | -1 | 0 | -1 | -1 | 0 | 0 | 0 |
| TR4154|c0_g2|m.6766 | Vitis vinifera | Putative uncharacterized protein | VIT_14s0036g00480 | 1019.4 |  |  |  | 12.269 | 29.777 |  | 1 | 1 | 1 | 1 | 0 | 0 | 0 | 0 |
| TR27370|c0_g1|m.12011 | Vitis vinifera | Putative uncharacterized protein | VIT_02s0012g02660 | 3589.6 | 36.969 |  |  | 84.544 |  |  | 0 | 0 | 0 | -1 | -1 | 0 | 0 | 0 |
| TR2738|c0_g2|m.26512 | Vitis vinifera | Putative uncharacterized protein | VIT_04s0008g00720 | 7862.2 | 939.84 | 896.07 | 630.81 | 352.87 |  |  | 0 | -1 | 0 | -1 | -1 | 0 | 0 | 0 |
| TR33679|c0_g1|m.48321 | Glycine max | Uncharacterized protein |  | 4376 | 24.734 |  | 47.358 |  |  | 280.68 | 1 | 1 | 0 | 0 | 0 | 0 | 0 | 0 |
| TR27396|c1_g2|m.61360 | Platanus acerifolia | Beta-1,3-glucanase (Fragment) | gluca | 13390 | 71.471 |  |  |  | 551.2 | 257.65 | 0 | 0 | -1 | 0 | 1 | 0 | 0 | 0 |
| TR27418|c0_g2|m.10406 | Glycine max | Uncharacterized protein | Gma.4307 | 2287 |  |  |  |  |  |  | 0 | 0 | 0 | 0 | 0 | 0 | 0 | 0 |
| TR27433|c0_g1|m.17842 | Vitis vinifera | Putative uncharacterized protein | VIT_09s0002g00230 | 645.66 |  |  |  |  |  |  | 0 | 0 | 0 | 0 | 0 | 0 | 0 | 0 |
| TR27592|c0_g1|m.1078 | Medicago truncatula | 60S ribosomal protein L23 | MTR_7g098290 | 47633 | 123.08 | 294.55 | 56.497 |  | 367.83 | 1560.1 | 0 | 0 | 0 | 0 | 0 | 0 | 0 | 0 |
| TR27596|c0_g3|m.11416 | Vitis vinifera | Putative uncharacterized protein | VIT_18s0041g00430 | 11022 | 870.13 | 583.28 | 746.34 | 342.6 |  | 123.46 | 0 | -1 | 0 | 0 | 0 | 0 | 0 | 0 |
| TR71998|c0_g1|m.5585 | Glycine max | Uncharacterized protein | Gma.19161 | 7010.1 | 136.67 | 141.98 | 157.85 | 20.741 | 83.413 | 40.113 | 0 | 0 | 0 | 0 | 0 | 0 | 0 | 0 |
| TR69727|c0_g1|m.60650 | Cucumis melo | 40S ribosomal protein S24 |  | 113590 | 502 | 483.33 | 2398.5 | 1043.7 | 759.51 | 484.71 | 0 | 0 | 0 | 0 | 0 | 0 | 0 | 0 |
| TR28003|c0_g1|m.39469 | Vitis vinifera | Putative uncharacterized protein | VIT_16s0022g00680 | 1559.5 |  |  |  |  |  |  | 0 | 0 | 0 | 0 | 0 | 0 | 0 | 0 |
| TR44448|c0_g1|m.2676 | Vitis vinifera | Putative uncharacterized protein | VIT_07s0005g04400 | 27720 | 1314 | 1295 | 202.05 | 421.34 | 471.59 | 452.48 | 0 | 0 | -1 | -1 | 0 | -1 | -1 | 0 |
| TR28006|c0_g1|m.38564 | Hevea brasiliensis | 60S ribosomal protein L12A | RPL12A | 16740 | 89.909 | 27.985 |  |  | 367.09 | 403.28 | 0 | 0 | -1 | 1 | 1 | 0 | 1 | 0 |
| TR9625|c0_g2|m.40682 | Gossypium raimondii | Glutamine synthetase | GS | 127700 | 726.53 | 1017.7 | 692.85 | 222.85 | 1519.5 | 2205.8 | 0 | 0 | 0 | 0 | 0 | 0 | 0 | 0 |
| TR28027|c0_g1|m.53777 | Ricinus communis | Annexin, putative | RCOM_1453020 | 395.44 | 2.4702 |  | 5.3895 |  |  |  | 0 | 0 | 0 | -1 | -1 | 0 | 0 | 0 |
| TR69254|c0_g1|m.40088 | Glycine max | Uncharacterized protein | Gma.57127 | 3424.3 | 57.374 | 58.214 |  | 62.484 | 296.38 | 206.92 | 1 | 1 | 0 | 1 | 0 | 0 | 1 | 0 |
| TR29174|c0_g1|m.10924 | Ricinus communis | Glutathione-s-transferase theta, gst, putative | RCOM_1599790 | 50637 | 462.07 |  |  |  |  | 1252.7 | 0 | 0 | -1 | 0 | 1 | 0 | 0 | 0 |
| TR65507|c0_g1|m.38664 | Nicotiana attenuata | Beta-tubulin | TUB | 5165.8 |  |  | 14.785 | 29.405 | 145.71 |  | 1 | 1 | 1 | 1 | 0 | 0 | 0 | 0 |
| TR29735|c0_g5|m.31491 | Ricinus communis | Minor allergen Alt a, putative | RCOM_0066700 | 2182.7 |  |  |  |  |  |  | 0 | 0 | 0 | 0 | 0 | 0 | 0 | 0 |
| TR40328|c2_g1|m.50818 | Mesembryanthemum crystallinum | Catalase |  | 734140 | 3169 | 3893.4 | 4649.1 | 3040.4 | 19591 | 21285 | 1 | 1 | 0 | 1 | 1 | 0 | 1 | 1 |
| TR29760|c0_g3|m.12449 | Medicago truncatula | 28 kDa heat-and acid-stable phosphoprotein | MTR_2g014950 | 19540 |  | 521.13 | 350.81 | 586.82 |  | 233.07 | 0 | -1 | 0 | 0 | 0 | 0 | 0 | 0 |
| TR29771|c0_g1|m.14651 | Arabidopsis lyrata | ATHSP101 | ARALYDRAFT_476565 | 9441.9 |  | 185.33 |  | 40.295 | 694.35 | 268.74 | 0 | 0 | 0 | 0 | 0 | 0 | 0 | 0 |
| TR4996|c0_g2|m.48239 | Silene latifolia | Cystathionine beta-synthase domain-containing protein (Fragment) |  | 1866.8 |  |  |  |  | 75.333 |  | 0 | 0 | 0 | 1 | 1 | 0 | 0 | 0 |
| TR33654|c1_g3|m.33384 | Arabidopsis thaliana | F22L4.5 protein | F22L4.5 | 14272 |  | 145.44 | 60.253 | 54.762 |  |  | 0 | -1 | -1 | -1 | -1 | -1 | 0 | 0 |
| TR29781|c0_g1|m.6482 | Vitis vinifera | Putative uncharacterized protein | VIT_17s0000g08660 | 4902.9 | 47.471 | 46.938 | 40.129 | 31.031 | 109.36 | 82.132 | 0 | 0 | 0 | 0 | 0 | 0 | 0 | 0 |
| TR29786|c1_g2|m.30429 | Mirabilis jalapa | Phopholipase D (Fragment) |  | 25979 | 238.81 | 179.43 | 109.57 | 116.19 | 613.51 | 851.99 | 0 | 0 | 0 | 0 | 1 | 0 | 0 | 1 |
| TR70928|c1_g6|m.17927 | Ricinus communis | Dihydroneopterin aldolase, putative | RCOM_0422000 | 1424.1 |  |  |  |  | 212.9 |  | 0 | 0 | 0 | 1 | 1 | 0 | 0 | 0 |
| TR43249|c0_g4|m.31536 | Medicago truncatula | Histone H3 | MTR_7g013610 | 23754 |  |  |  | 15.6 | 235.32 | 326.08 | 1 | 1 | 1 | 1 | 0 | 0 | 0 | 0 |
| TR38943|c0_g1|m.37942 | Camellia nitidissima | Chalcone isomerase | CHI | 845.33 |  |  |  |  |  |  | 0 | 0 | 0 | 0 | 0 | 0 | 0 | 0 |
| TR30305|c0_g3|m.35735 | Ricinus communis | Vesicle-associated membrane protein, putative | RCOM_1282000 | 2211.7 | 48.262 |  | 16.688 |  | 123.24 | 151.45 | 0 | 0 | 0 | 0 | 0 | 0 | 0 | 0 |
| TR48870|c0_g1|m.61673 | Sesuvium portulacastrum | Fructose-bisphosphate aldolase | FBA | 647.38 |  |  |  | 4.8455 | 38.158 | 46.8 | 1 | 1 | 1 | 1 | 0 | 0 | 0 | 0 |
| TR47955|c0_g5|m.55175 | Ricinus communis | Ribulose bisphosphate carboxylase/oxygenase activase 1, chloroplast, putative | RCOM_0233730 | 16849 | 90.786 | 129.99 |  |  | 421.58 | 384.73 | 0 | 0 | -1 | 1 | 1 | 0 | 1 | 0 |
| TR30334|c0_g2|m.38930 | Vitis vinifera | Putative uncharacterized protein | VIT_04s0023g03600 | 664.54 | 101.1 | 71.51 |  |  |  |  | 0 | 0 | -1 | -1 | 0 | 0 | 0 | 0 |
| TR30338|c0_g4|m.53740 | Ricinus communis | Putative uncharacterized protein | RCOM_1435680 | 1170.7 | 158.74 | 162.22 |  |  |  |  | 0 | 0 | -1 | -1 | 0 | 0 | 0 | 0 |
| TR30348|c16_g13|m.16115 | Cactus virus X | 25 kDa protein |  | 6848 |  |  | 15.932 |  |  |  | 0 | 0 | 1 | 0 | -1 | 0 | 0 | 0 |
| TR30350|c0_g2|m.1982 | Vitis vinifera | Annexin | VITISV_030870 | 66979 | 984.31 | 831.55 | 1285.3 | 1221.8 | 1189.6 | 1196.3 | 0 | 0 | 0 | 0 | 0 | 0 | 0 | 0 |
| TR33757|c2_g7|m.2494 | Medicago truncatula | Uncharacterized protein |  | 186980 | 1873.1 | 2721.2 | 834.24 | 731.81 | 6786.9 | 5166.4 | 0 | 0 | 0 | 0 | 1 | 0 | 0 | 1 |
| TR3109|c0_g2|m.19037 | Solanum demissum | EF hand family protein | SDM1_19t00017 | 4993.7 | 88.055 | 79.188 | 96.732 | 37.103 | 92.038 |  | 0 | 0 | 0 | 0 | 0 | 0 | 0 | 0 |
| TR31111|c0_g1|m.46750 | Vitis vinifera | Proteasome subunit alpha type | VIT_01s0011g01960 | 563.69 | 82.064 |  |  |  |  |  | 0 | 0 | -1 | -1 | 0 | 0 | 0 | 0 |
| TR86306|c0_g1|m.6436 | Arabidopsis lyrata | 60S ribosomal protein L21 | ARALYDRAFT_471057 | 62646 | 662.34 | 520.05 | 583.86 | 403.48 | 2315.4 | 2008.4 | 0 | 0 | 0 | 1 | 1 | 0 | 1 | 1 |
| TR31142|c1_g4|m.44359 | Ricinus communis | 60S ribosomal protein L11, putative | RCOM_1594400 | 31231 | 473.8 | 444.82 | 878.9 | 586.27 | 617.73 | 387.57 | 0 | 0 | 0 | 0 | 0 | 0 | 0 | 0 |
| TR31154|c0_g1|m.34999 | Arabidopsis lyrata | Ribosomal protein S11-beta | RPS11-BETA | 41529 | 400.66 | 478.43 | 209.93 | 445.56 | 1080.4 | 989.21 | 0 | 0 | 0 | 1 | 1 | 0 | 1 | 1 |
| TR31157|c0_g1|m.4957 | Silene latifolia | Spermidine synthase X (Fragment) |  | 3067.9 |  | 83.512 |  |  |  |  | 0 | 0 | -1 | -1 | 0 | 0 | 0 | 0 |
| TR58651|c0_g1|m.53482 | Jatropha curcas | Lipoic acid synthase |  | 10741 | 283.28 | 233.64 | 49.788 | 18.814 | 356.69 | 290.11 | 0 | 0 | -1 | 0 | 1 | -1 | 0 | 1 |
| TR3131|c1_g1|m.45421 | Medicago truncatula | Putative uncharacterized protein | MTR_2g061140 | 205140 | 4085.9 | 5300.2 | 1706.5 | 1948.8 | 7255 | 1725.4 | 0 | 0 | -1 | 0 | 0 | -1 | 0 | 0 |
| TR31329|c0_g3|m.23478 | Selaginella moellendorffii | UDP-L-arabinose mutase-like protein (Fragment) | RGP1-1 | 2552.5 | 98.589 | 112.15 |  | 213.68 |  |  | 0 | 0 | 0 | -1 | -1 | 0 | 0 | 0 |
| TR59642|c2_g1|m.59667 | Weingartia kargliana | ATP synthase subunit alpha, chloroplastic (Fragment) | atpA | 694940 | 9403.6 | 10050 | 7896.9 | 7136.4 | 19370 | 15626 | 0 | 0 | 0 | 0 | 1 | 0 | 0 | 1 |
| TR3160|c0_g1|m.10576 | Vitis vinifera | Putative uncharacterized protein | VIT_08s0007g01340 | 1834 |  |  |  |  |  |  | 0 | 0 | 0 | 0 | 0 | 0 | 0 | 0 |
| TR57906|c0_g2|m.32204 | Picea sitchensis | Putative uncharacterized protein |  | 778.4 |  |  |  | 22.73 | 128.19 |  | 1 | 1 | 1 | 1 | 0 | 0 | 0 | 0 |
| TR31636|c0_g1|m.56706 | Lotus japonicus | Uncharacterized protein |  | 342.67 |  |  |  |  |  |  | 0 | 0 | 0 | 0 | 0 | 0 | 0 | 0 |
| TR49375|c0_g1|m.7207 | Glycine max | Uncharacterized protein | Gma.8707 | 3754.2 |  |  |  |  |  |  | 0 | 0 | 0 | 0 | 0 | 0 | 0 | 0 |
| TR31657|c0_g1|m.42444 | Vitis vinifera | Putative uncharacterized protein | VIT_18s0041g02110 | 6762.2 | 142.83 | 141.9 | 87.489 | 57.998 | 149.95 | 391.59 | 0 | 0 | -1 | 0 | 0 | -1 | 0 | 0 |
| TR41858|c0_g5|m.45863 | Vitis vinifera | 50S ribosomal protein L31 | VITISV_040159 | 7909 | 185.61 | 238.23 | 166.7 |  | 658.02 |  | 0 | 0 | 0 | 0 | 0 | 0 | 0 | 0 |
| TR31663|c1_g1|m.18961 | Populus trichocarpa | Predicted protein | POPTRDRAFT_716296 | 3228.7 | 65.588 | 82.684 |  |  | 77.823 |  | 0 | 0 | -1 | 0 | 1 | 0 | 0 | 0 |
| TR31666|c0_g1|m.5386 | Vitis vinifera | Type II peroxiredoxin E |  | 27884 | 409.51 | 647.48 | 145.15 |  | 542.78 | 819.68 | 0 | 0 | 0 | 0 | 0 | 0 | 0 | 0 |
| TR31673|c0_g7|m.27823 | Glycine max | Uncharacterized protein | Gma.56522 | 95693 | 1664.3 | 1851 | 1993.3 | 1297 | 945.43 | 1128.6 | 0 | -1 | 0 | -1 | 0 | 0 | -1 | 0 |
| TR31682|c0_g1|m.52875 | Medicago truncatula | Putative uncharacterized protein | MTR_4g072040 | 8741.5 | 162.94 | 203.64 | 35.039 | 137.13 |  | 627.13 | 0 | 0 | 0 | 0 | 0 | 0 | 0 | 0 |
| TR62343|c0_g4|m.44135 | Vitis vinifera | Putative uncharacterized protein | VIT_18s0072g00400 | 26468 | 403.2 | 464.86 | 194.34 |  | 711.66 | 757.94 | 0 | 0 | 0 | 1 | 1 | 0 | 1 | 1 |
| TR31691|c1_g3|m.4490 | Vitis vinifera | Putative uncharacterized protein | VIT_05s0049g01500 | 7042.6 |  |  | 56.627 | 73.067 |  |  | 0 | 0 | 1 | 0 | -1 | 0 | 0 | 0 |
| TR44687|c0_g1|m.21725 | Populus trichocarpa | Predicted protein (Fragment) | POPTRDRAFT_715538 | 103430 | 498.57 | 661.92 | 257.03 | 108.03 | 2975.6 | 964.15 | 0 | 0 | 0 | 0 | 0 | 0 | 0 | 0 |
| TR3849|c0_g2|m.54456 | Glycine max | Uncharacterized protein | Gma.45998 | 2884.8 |  |  | 38.374 |  |  | 184.19 | 1 | 1 | 1 | 1 | 0 | 0 | 0 | 0 |
| TR72231|c0_g2|m.42882 | Populus trichocarpa | Predicted protein (Fragment) | POPTRDRAFT_923624 | 1988 | 79.317 |  | 62.03 |  |  |  | 0 | -1 | 0 | -1 | -1 | 0 | 0 | 0 |
| TR47211|c0_g2|m.11867 | Lotus japonicus | Uncharacterized protein |  | 11167 | 72.309 | 15.561 | 173.23 | 131.78 | 298.59 | 32.069 | 0 | 0 | 0 | 0 | 0 | 0 | 0 | 0 |
| TR31974|c0_g1|m.3302 | Mesembryanthemum crystallinum | Geranylgeranyl hydrogenase |  | 496.57 |  | 33.962 |  |  | 17.651 | 19.845 | 0 | 0 | -1 | 0 | 1 | 0 | 0 | 0 |
| TR31976|c0_g1|m.53480 | Amaranthus hypochondriacus | Cystatin | CPI | 3985.7 |  |  | 51.341 | 99.123 | 170.16 |  | 1 | 1 | 1 | 1 | 0 | 0 | 0 | 0 |
| TR32871|c0_g1|m.34317 | Glycine max | Uncharacterized protein | Gma.17843 | 5391.9 |  |  |  |  |  |  | 0 | 0 | 0 | 0 | 0 | 0 | 0 | 0 |
| TR7927|c0_g1|m.2249 | Vitis vinifera | Putative uncharacterized protein | VIT_04s0008g00720 | 31277 | 1335.7 | 1357.7 | 1267.9 | 1176.9 |  |  | 0 | -1 | 0 | -1 | -1 | 0 | 0 | 0 |
| TR32286|c0_g1|m.21930 | Vitis vinifera | Putative uncharacterized protein | VIT_11s0118g00670 | 1600.4 | 45.5 |  |  |  |  |  | 0 | 0 | -1 | -1 | 0 | 0 | 0 | 0 |
| TR32347|c0_g1|m.2659 | Vitis vinifera | Putative uncharacterized protein | VIT_18s0001g08800 | 8916.8 | 211.31 | 245.13 | 136.64 | 183.54 | 82.279 | 135.61 | 0 | -1 | 0 | 0 | 0 | 0 | 0 | 0 |
| TR33514|c0_g1|m.52178 | Lotus japonicus | Uncharacterized protein |  | 8727.8 | 49.197 | 191.92 | 197.29 | 83.164 | 320.21 |  | 1 | 1 | 0 | 0 | 0 | 0 | 0 | 0 |
| TR3660|c0_g1|m.56518 | Lotus japonicus | Uncharacterized protein |  | 3913.8 |  |  | 260.85 | 88.407 |  |  | 0 | 0 | 1 | 0 | -1 | 0 | 0 | 0 |
| TR3695|c0_g1|m.59032 | Ricinus communis | 60S acidic ribosomal protein P1, putative | RCOM_1339620 | 16831 |  | 249.52 |  |  | 1811.6 |  | 0 | 0 | -1 | 0 | 1 | 0 | 0 | 0 |
| TR32894|c0_g4|m.44062 | Ricinus communis | Microsomal signal peptidase 23 kD subunit, putative | RCOM_1431020 | 3201.5 |  | 59.321 | 207.61 | 58.584 |  |  | 0 | 0 | 0 | -1 | -1 | 0 | 0 | 0 |
| TR4004|c0_g1|m.55648 | Beta vulgaris | Heat shock protein 83 (Fragment) | hsp83 | 7021.3 |  |  | 50.944 |  | 529.8 | 250.99 | 1 | 1 | 1 | 1 | 0 | 0 | 0 | 0 |
| TR32902|c0_g3|m.62453 | Ricinus communis | Mitochondrial import inner membrane translocase subunit Tim13, putative | RCOM_1314610 | 1608.8 |  |  |  |  |  | 437.95 | 0 | 0 | 0 | 1 | 1 | 0 | 0 | 0 |
| TR51555|c1_g1|m.49606 | Vitis vinifera | Translation initiation factor IF-3 | VIT_11s0037g00520 | 4376.5 | 97.956 | 78.561 |  |  |  | 107.12 | 0 | 0 | -1 | 0 | 1 | 0 | 0 | 0 |
| TR33516|c0_g1|m.40626 | Gossypium hirsutum | Vacuolar H+-ATPase catalytic subunit |  | 103590 | 2562.3 | 2387.7 | 1180.6 | 974.61 | 1167.8 | 964.57 | 0 | -1 | -1 | -1 | 0 | -1 | -1 | 0 |
| TR33616|c0_g2|m.24523 | Hevea brasiliensis | Eukaryotic translation initiation factor 5A isoform IV | eIF-5A | 7906.4 | 93.147 | 30.878 |  |  | 315.01 | 223.64 | 0 | 0 | -1 | 0 | 1 | 0 | 0 | 0 |
| TR33650|c1_g2|m.10460 | Glycine max | SGF14h | Gma.52344 | 5018.4 | 32.887 | 34.274 | 38.945 | 99.185 | 214.29 |  | 1 | 1 | 0 | 1 | 0 | 0 | 1 | 0 |
| TR33650|c1_g5|m.3225 | Vitis vinifera | Putative uncharacterized protein | VIT_18s0001g06330 | 692270 | 9754.7 | 11415 | 12071 | 8671.6 | 12376 | 6084.6 | 0 | -1 | 0 | 0 | 0 | 0 | 0 | 0 |
| TR33674|c0_g3|m.57193 | Vitis vinifera | Heat shock protein 101 | hsp101 | 497.67 |  |  |  |  |  |  | 0 | 0 | 0 | 0 | 0 | 0 | 0 | 0 |
| TR33684|c0_g1|m.20726 | Populus trichocarpa | Putative uncharacterized protein | POPTRDRAFT_573245 | 802.37 | 26.624 |  |  | 11.599 | 139.14 |  | 0 | 0 | 0 | 0 | 0 | 0 | 0 | 0 |
| TR60646|c4_g2|m.24951 | Diospyros kaki | Xyloglucan endotransglucosylase/hydrolase | XTH3 | 47151 | 605.6 | 1050.3 | 398.26 | 352.67 |  |  | 0 | -1 | 0 | -1 | -1 | 0 | 0 | 0 |
| TR33695|c4_g1|m.31511 | Ricinus communis | Vesicle-associated membrane protein, putative | RCOM_1061150 | 7408.6 | 36.868 | 48.226 | 94.733 | 44.44 | 416.81 |  | 1 | 1 | 0 | 1 | 0 | 0 | 1 | 0 |
| TR41831|c1_g7|m.45063 | Ricinus communis | 40S ribosomal protein S15, putative | RCOM_0908990 | 130360 | 1282.7 | 1303.9 | 441.69 | 153.9 | 6589.5 | 7013.3 | 0 | 0 | -1 | 1 | 1 | -1 | 1 | 1 |
| TR33696|c0_g9|m.61855 | Populus trichocarpa | Predicted protein | POPTRDRAFT_816102 | 3875.5 |  |  | 180.22 | 216.73 |  |  | 0 | 0 | 1 | 0 | -1 | 0 | 0 | 0 |
| TR33716|c7_g16|m.9695 | Zygocactus virus X | Coat protein |  | 766.48 |  |  | 16.83 | 12.852 |  |  | 0 | 0 | 1 | 0 | -1 | 0 | 0 | 0 |
| TR33726|c0_g1|m.56011 | Garcinia mangostana | Chalcone isomerase | CHI | 3654.7 |  |  |  |  | 38.258 |  | 0 | 0 | 0 | 1 | 1 | 0 | 0 | 0 |
| TR70794|c0_g1|m.23809 | Vitis vinifera | Putative uncharacterized protein | VIT_03s0180g00140 | 1003.3 |  | 22.032 |  |  |  |  | 0 | 0 | -1 | -1 | 0 | 0 | 0 | 0 |
| TR33768|c0_g1|m.34966 | Ricinus communis | Galactokinase, putative | RCOM_1001220 | 11740 |  | 47.687 | 91.997 | 48.205 | 204.4 | 249.37 | 1 | 1 | 0 | 0 | 1 | 0 | 0 | 1 |
| TR75568|c0_g1|m.56613 | Glycine max | Uncharacterized protein | Gma.23810 | 13783 | 150.24 | 381.33 | 204.32 | 125.29 | 257.95 | 412.67 | 0 | 0 | 0 | 0 | 0 | 0 | 0 | 0 |
| TR33798|c0_g1|m.15778 | Populus trichocarpa | Predicted protein | POPTRDRAFT_832238 | 29162 | 154.48 | 109.22 | 528.27 | 696.5 | 769.36 | 394.95 | 0 | 0 | 1 | 0 | 0 | 1 | 0 | 0 |
| TR33802|c0_g1|m.40537 | Gossypium hirsutum | Ted2 |  | 15580 | 118.85 | 300.04 | 76.986 | 24.97 | 717.54 |  | 0 | 0 | 0 | 0 | 1 | 0 | 0 | 1 |
| TR39268|c0_g7|m.31262 | Arabidopsis lyrata | Putative uncharacterized protein | ARALYDRAFT_898258 | 42924 | 692.59 | 542.52 | 754.66 | 600.81 | 1468.1 | 1650.6 | 1 | 1 | 0 | 1 | 1 | 0 | 1 | 1 |
| TR34118|c0_g1|m.62014 | Populus trichocarpa | Predicted protein | POPTRDRAFT_724795 | 18635 | 311.98 | 358.25 | 77.448 | 127.65 | 206.19 | 470.44 | 0 | 0 | -1 | 0 | 0 | -1 | 0 | 0 |
| TR34445|c0_g1|m.5155 | Glycine max | Uncharacterized protein | Gma.49051 | 542.29 |  |  |  | 36.236 |  |  | 0 | 0 | 1 | 0 | -1 | 0 | 0 | 0 |
| TR56206|c0_g1|m.18164 | Populus trichocarpa | Predicted protein | POPTRDRAFT_836439 | 7220.5 | 50.71 |  | 73.669 | 33.209 | 551.88 | 83.672 | 0 | 0 | 0 | 0 | 0 | 0 | 0 | 0 |
| TR39297|c0_g4|m.29592 | Glycine max | Uncharacterized protein |  | 26849 |  |  |  | 26.96 | 535.87 | 532.06 | 1 | 1 | 1 | 1 | 1 | 0 | 0 | 1 |
| TR34619|c0_g2|m.12993 | Medicago truncatula | Polygalacturonase inhibitor protein | MTR_7g023630 | 30361 | 38.509 | 122.77 |  | 61.471 | 1143.2 | 1811.7 | 0 | 0 | 0 | 0 | 0 | 0 | 0 | 0 |
| TR42239|c0_g1|m.25375 | Glycine max | Uncharacterized protein | Gma.31150 | 21401 |  |  |  |  | 699.5 | 837.23 | 0 | 0 | 0 | 1 | 1 | 0 | 0 | 0 |
| TR34666|c0_g1|m.57513 | Populus trichocarpa | Predicted protein | POPTRDRAFT_1084309 | 1982.6 |  |  |  |  |  |  | 0 | 0 | 0 | 0 | 0 | 0 | 0 | 0 |
| TR75240|c0_g1|m.561 | Vitis vinifera | Small heat shock protein 17.3 kDa |  | 270770 | 1910.3 | 2230.6 | 245.7 | 123.36 | 5509.6 | 7202.6 | 0 | 0 | -1 | 1 | 1 | -1 | 1 | 1 |
| TR357|c0_g1|m.61070 | Beta vulgaris | rRNA N-glycosidase | betavulgin | 48004 | 39.064 | 125.11 |  |  | 673.38 |  | 0 | 0 | -1 | 0 | 1 | 0 | 0 | 0 |
| TR35725|c0_g1|m.36910 | Vitis vinifera | Putative uncharacterized protein | VIT_03s0097g00530 | 26036 | 277.94 | 277.06 | 96.797 | 68.465 | 311.58 | 169.22 | 0 | 0 | -1 | 0 | 0 | -1 | 0 | 0 |
| TR35762|c0_g1|m.21902 | Vitis vinifera | Putative uncharacterized protein | VIT_18s0001g08250 | 2246 |  |  |  | 13.632 | 86.853 |  | 1 | 1 | 1 | 1 | 0 | 0 | 0 | 0 |
| TR68444|c0_g1|m.13301 | Glycine max | Uncharacterized protein | Gma.20720 | 4145.9 | 128.28 | 33.847 | 57.789 | 73.543 |  | 342.27 | 0 | 0 | 0 | 0 | 1 | 0 | 0 | 1 |
| TR35791|c0_g1|m.59290 | Populus trichocarpa | Predicted protein (Fragment) | POPTRDRAFT_246818 | 3600.2 | 27.139 | 27.923 | 39.189 | 22.428 |  | 112.7 | 1 | 1 | 0 | 1 | 0 | 0 | 1 | 0 |
| TR7885|c0_g1|m.18504 | Arabidopsis lyrata | Predicted protein | ARALYDRAFT_673495 | 6568.4 | 29.173 | 38.406 |  |  | 41.049 |  | 0 | 0 | -1 | 0 | 1 | 0 | 0 | 0 |
| TR36151|c0_g2|m.4191 | Senecio scandens | Small heat shock protein (Fragment) |  | 778.31 |  |  |  |  |  |  | 0 | 0 | 0 | 0 | 0 | 0 | 0 | 0 |
| TR36275|c0_g1|m.39617 | Populus trichocarpa | Predicted protein | POPTRDRAFT_820318 | 8843.7 |  |  | 21.578 | 20.773 | 459.36 | 387.93 | 1 | 1 | 1 | 1 | 1 | 0 | 0 | 1 |
| TR364|c0_g1|m.7250 | Populus trichocarpa | 6-phosphogluconate dehydrogenase, decarboxylating | POPTRDRAFT_837012 | 13483 |  | 182.09 | 152.33 |  | 510.8 |  | 0 | 0 | 0 | 0 | 0 | 0 | 0 | 0 |
| TR36763|c0_g1|m.30274 | Populus trichocarpa | Predicted protein | POPTRDRAFT_1109864 | 352900 | 3167.2 | 5069.8 | 2215.4 | 840.19 | 2716.8 | 2890.2 | 0 | 0 | 0 | 0 | 0 | 0 | 0 | 0 |
| TR45526|c0_g6|m.13584 | Glycine max | Uncharacterized protein | Gma.54873 | 26688 | 521.23 | 630.06 | 602.54 | 337.29 | 1147.9 | 241.64 | 0 | 0 | 0 | 0 | 0 | 0 | 0 | 0 |
| TR44914|c0_g2|m.59278 | Solanum tuberosum | Fructokinase-like |  | 12925 |  | 34.613 | 79.275 | 27.395 |  |  | 0 | 0 | 0 | -1 | -1 | 0 | 0 | 0 |
| TR3712|c0_g2|m.25267 | Populus trichocarpa | Predicted protein | POPTRDRAFT_1108923 | 959.65 |  |  | 13.502 | 31.726 |  |  | 0 | 0 | 1 | 0 | -1 | 0 | 0 | 0 |
| TR37139|c1_g1|m.41315 | Populus trichocarpa | Predicted protein | POPTRDRAFT_666563 | 6430.3 | 310.05 |  | 518.06 | 232.38 |  | 94.004 | 0 | 0 | 0 | 0 | 0 | 0 | 0 | 0 |
| TR3738|c0_g5|m.45798 | Atriplex hortensis | Putative DNA binding protein |  | 6084 | 17.206 | 66.357 | 35.854 | 130.4 | 244.7 | 90.726 | 1 | 1 | 0 | 0 | 0 | 0 | 0 | 0 |
| TR3739|c0_g2|m.32848 | Ricinus communis | Rhythmically-expressed protein 2 protein, putative | RCOM_1196130 | 4347.3 | 181.51 | 53.991 | 30.656 |  |  |  | 0 | -1 | 0 | -1 | -1 | 0 | 0 | 0 |
| TR37619|c0_g1|m.10160 | Spinacia oleracea | 6-phosphogluconate dehydrogenase, decarboxylating | pgdC | 11462 |  |  |  |  |  | 574.84 | 0 | 0 | 0 | 1 | 1 | 0 | 0 | 0 |
| TR43187|c0_g1|m.35447 | Mesembryanthemum crystallinum | Small GTP-binding protein | rab5B | 950.02 | 40.38 |  |  |  | 110.51 |  | 0 | 0 | -1 | 0 | 1 | 0 | 0 | 0 |
| TR37865|c0_g1|m.25634 | Capsicum annuum | Chloroplast ferredoxin-NADP+ oxidoreductase (Precursor) | fnr | 802.77 |  |  |  |  |  |  | 0 | 0 | 0 | 0 | 0 | 0 | 0 | 0 |
| TR38178|c0_g1|m.48940 | Gossypium hirsutum | Alpha-expansin (Precursor) | Exp6 | 1742.1 |  |  |  |  |  |  | 0 | 0 | 0 | 0 | 0 | 0 | 0 | 0 |
| TR57239|c0_g1|m.21402 | Vitis vinifera | Putative uncharacterized protein | VIT_14s0068g02030 | 2763.4 | 96.137 | 151.02 | 18.43 | 18.171 |  |  | 0 | -1 | 0 | -1 | -1 | 0 | 0 | 0 |
| TR76778|c0_g1|m.21194 | Medicago truncatula | ADP-ribosylation factor | MTR_5g034130 | 13470 |  | 254.51 | 251.47 | 176.79 | 257.77 | 434.94 | 0 | 0 | 0 | 0 | 0 | 0 | 0 | 0 |
| TR57169|c0_g3|m.10835 | Ricinus communis | ATP synthase D chain, mitochondrial, putative | RCOM_1399280 | 86846 | 1188.4 | 792.63 | 685.02 | 412.45 | 2258.7 | 1376.4 | 0 | 0 | 0 | 0 | 0 | 0 | 0 | 0 |
| TR57169|c0_g2|m.45702 | Ricinus communis | ATP synthase D chain, mitochondrial, putative | RCOM_1399280 | 5839.2 |  |  |  |  | 203.56 | 210.65 | 0 | 0 | 0 | 1 | 1 | 0 | 0 | 0 |
| TR60037|c0_g1|m.45091 | Arabidopsis lyrata | EMB1473 | ARALYDRAFT_477028 | 8905.3 | 134.78 | 98.869 | 68.15 |  | 127.77 | 108.68 | 0 | 0 | 0 | 0 | 0 | 0 | 0 | 0 |
| TR38954|c0_g1|m.55645 | Vitis vinifera | Putative uncharacterized protein | VIT_04s0023g02340 | 471.8 |  | 38.78 | 25.455 | 17.57 |  |  | 0 | -1 | 0 | -1 | -1 | 0 | 0 | 0 |
| TR38956|c2_g10|m.29582 | Gossypium hirsutum | Lactoylglutathione lyase |  | 477190 | 9958.3 | 14559 | 4942.2 | 3953.3 | 10281 | 9170 | 0 | 0 | 0 | 0 | 1 | 0 | 0 | 1 |
| TR38956|c2_g13|m.5926 | Picea sitchensis | Putative uncharacterized protein |  | 5581.8 |  |  | 73.073 |  |  |  | 0 | 0 | 1 | 0 | -1 | 0 | 0 | 0 |
| TR38985|c0_g1|m.41669 | Vitis vinifera | Isoflavone reductase-like protein 5 | ifrl5 | 26631 | 191.29 | 146.06 | 61.498 | 239.61 | 1562.5 | 1513.1 | 0 | 0 | 0 | 1 | 1 | 0 | 1 | 1 |
| TR69161|c0_g2|m.50323 | Vitis vinifera | Putative uncharacterized protein | VIT_16s0098g01540 | 8791 | 276.58 | 114.38 | 128.41 | 96.439 | 123.6 | 155.58 | 0 | 0 | 0 | 0 | 0 | 0 | 0 | 0 |
| TR38994|c0_g1|m.41057 | Populus deltoides | UDP-glucose pyrophosphorylase |  | 2308.6 |  |  | 43.148 | 15.37 |  |  | 0 | 0 | 1 | 0 | -1 | 0 | 0 | 0 |
| TR39250|c0_g1|m.3545 | Ricinus communis | Epoxide hydrolase, putative | RCOM_1175510 | 21966 |  | 141.04 | 47.288 | 52.732 | 311.71 | 342.5 | 0 | 0 | -1 | 0 | 1 | -1 | 0 | 1 |
| TR4160|c0_g1|m.5858 | Vitis vinifera | Putative uncharacterized protein | VIT_17s0000g05650 | 12165 | 130.62 | 198.99 | 104.59 |  | 174.54 |  | 0 | 0 | 0 | 0 | 0 | 0 | 0 | 0 |
| TR39594|c1_g2|m.6700 | Ricinus communis | Remorin, putative | RCOM_1614760 | 11917 | 142.16 | 265.33 | 357.7 | 289.68 |  |  | 0 | 0 | 0 | -1 | -1 | 0 | 0 | 0 |
| TR56131|c0_g1|m.33896 | Vitis vinifera | Putative uncharacterized protein | VIT_11s0016g01380 | 50234 | 283.12 | 301.94 | 250.04 | 200.89 | 1834.3 | 1808.5 | 0 | 0 | 0 | 1 | 1 | 0 | 1 | 1 |
| TR39328|c0_g1|m.2418 | Ricinus communis | Plastid-lipid-associated protein, chloroplast, putative | RCOM_0705630 | 90954 | 1102.8 | 1279.6 | 207.02 | 113.48 | 3425.5 | 3613.7 | 0 | 0 | -1 | 1 | 1 | -1 | 1 | 1 |
| TR42551|c2_g13|m.19121 | Populus trichocarpa | Predicted protein | POPTRDRAFT_713347 | 6754.3 | 16.713 |  | 62.566 | 16.163 |  | 109.39 | 1 | 1 | 0 | 0 | 0 | 0 | 0 | 0 |
| TR39560|c0_g1|m.36162 | Glycine max | Uncharacterized protein | Gma.12980 | 5490.9 | 75.97 |  | 48.456 |  | 190.79 | 252.46 | 0 | 0 | 0 | 0 | 0 | 0 | 0 | 0 |
| TR39585|c1_g3|m.53387 | Vitis vinifera | Putative uncharacterized protein | VIT_09s0002g01620 | 197370 | 851.97 | 832.53 | 1353.3 | 1375.9 | 7477.6 | 6488.8 | 1 | 1 | 1 | 1 | 1 | 1 | 1 | 1 |
| TR39589|c0_g4|m.14341 | Zea mays | NAD-dependent epimerase/dehydratase |  | 977.22 |  |  |  |  | 38.392 | 72.662 | 0 | 0 | 0 | 1 | 1 | 0 | 0 | 0 |
| TR39592|c0_g2|m.48115 | Ricinus communis | Methyltransferase, putative | RCOM_1047730 | 1195.9 |  |  |  |  | 160.12 |  | 0 | 0 | 0 | 1 | 1 | 0 | 0 | 0 |
| TR39684|c0_g1|m.31110 | Spinacia oleracea | Glutamine synthetase | GS1 | 109890 | 1874.2 | 1019.4 | 654.83 | 341.16 | 547.84 | 1029.1 | 0 | 0 | 0 | 0 | 0 | 0 | 0 | 0 |
| TR39803|c0_g2|m.10813 | Medicago truncatula | Cysteine-rich repeat secretory protein | MTR_7g052020 | 5520.5 | 43.405 | 30.137 | 7.1751 |  |  |  | 0 | -1 | 0 | -1 | -1 | 0 | 0 | 0 |
| TR62368|c0_g1|m.48122 | Glycine max | Uncharacterized protein |  | 1926.2 |  | 28.324 |  |  |  | 62.361 | 0 | 0 | -1 | 0 | 1 | 0 | 0 | 0 |
| TR77926|c0_g1|m.61561 | Ricinus communis | Small heat-shock protein, putative | RCOM_0899650 | 9457.3 | 120.51 |  |  | 33.541 | 351.15 | 139.43 | 0 | 0 | 0 | 0 | 0 | 0 | 0 | 0 |
| TR9023|c0_g4|m.47517 | Fagopyrum esculentum | Aspartic proteinase | gFeAP9 | 8826.4 | 170.03 | 42.084 | 96.44 | 117.91 |  | 119.86 | 1 | 1 | 0 | 0 | 0 | 0 | 0 | 0 |
| TR40170|c0_g1|m.1311 | Vitis vinifera | Putative uncharacterized protein | VIT_16s0022g02170 | 18330 | 464.82 | 171.86 | 2.5949 | 45.874 | 520.58 | 489.05 | 0 | 0 | 0 | 0 | 1 | 0 | 0 | 1 |
| TR40255|c0_g8|m.19495 | Spinacia oleracea | Ascorbate peroxidase |  | 423370 | 4437.5 | 4451.4 | 3698.1 | 2535.1 | 16669 | 15719 | 0 | 0 | 0 | 1 | 1 | 0 | 1 | 1 |
| TR40262|c0_g2|m.16843 | Vitis vinifera | Proteasome subunit beta type | VIT_15s0048g00900 | 1704.2 | 90.808 | 129.32 |  |  |  |  | 0 | 0 | -1 | -1 | 0 | 0 | 0 | 0 |
| TR40262|c1_g2|m.17050 | Vitis vinifera | Proteasome subunit beta type | VIT_15s0048g00900 | 68514 | 527.16 | 686.32 | 440.36 | 344.72 | 1457.6 | 2035.4 | 0 | 0 | 0 | 0 | 1 | 0 | 0 | 1 |
| TR60038|c0_g1|m.1250 | Vitis vinifera | Putative uncharacterized protein | VITISV_004987 | 803.78 |  |  |  |  | 118.88 | 83.539 | 0 | 0 | 0 | 1 | 1 | 0 | 0 | 0 |
| TR40344|c0_g2|m.3124 | Ricinus communis | Peptidyl-prolyl cis-trans isomerase, putative | RCOM_0850710 | 23585 | 421.57 | 466.62 | 302.01 | 611 | 228.14 |  | 0 | -1 | 0 | 0 | 0 | 0 | 0 | 0 |
| TR40822|c0_g3|m.11870 | Malus x domestica x Pyrus communis | Ribulose bisphosphate carboxylase small chain (Precursor) | rbcS | 926160 | 7512.6 | 8588.2 | 3217 | 1947.5 | 30391 | 29201 | 0 | 0 | -1 | 1 | 1 | -1 | 1 | 1 |
| TR40837|c0_g1|m.10988 | Medicago truncatula | Cysteine-rich repeat secretory protein | MTR_7g052020 | 2181.7 |  |  |  |  |  |  | 0 | 0 | 0 | 0 | 0 | 0 | 0 | 0 |
| TR49355|c0_g1|m.6065 | Musa balbisiana | Chlorophyll A-B binding protein (CAB), putative | MBP_91N22.12 | 585650 | 5508.6 | 6585 | 3038.9 | 2688.8 | 11953 | 8892.8 | 0 | 0 | -1 | 0 | 1 | -1 | 0 | 1 |
| TR41850|c0_g3|m.57140 | Vitis vinifera | Putative uncharacterized protein | VIT_05s0020g01140 | 370.18 |  |  |  |  |  |  | 0 | 0 | 0 | 0 | 0 | 0 | 0 | 0 |
| TR41856|c0_g7|m.15986 | Ranunculus asiaticus | Putative root storage protein | JR14 | 6411.2 |  | 18.525 |  |  |  |  | 0 | 0 | -1 | -1 | 0 | 0 | 0 | 0 |
| TR58670|c0_g1|m.21424 | Vitis vinifera | Putative uncharacterized protein | VIT_07s0005g05160 | 23688 | 22.217 | 108.92 | 217.77 | 68.784 | 873.58 | 1445 | 1 | 1 | 0 | 0 | 0 | 0 | 0 | 0 |
| TR41894|c1_g4|m.4329 | Populus trichocarpa | Predicted protein | POPTRDRAFT_827713 | 75076 | 453.34 | 457.31 | 700.41 | 648.72 | 2349.8 | 1722.4 | 1 | 1 | 0 | 1 | 1 | 0 | 1 | 1 |
| TR57885|c0_g2|m.56270 | Glycine max | Uncharacterized protein | Gma.55007 | 123870 | 1313.2 | 1097.7 | 1107.7 | 476.22 | 4244.9 | 4000.3 | 0 | 0 | 0 | 1 | 1 | 0 | 1 | 1 |
| TR7893|c0_g1|m.58249 | Ricinus communis | Chlorophyll A/B binding protein, putative | RCOM_0483250 | 136490 | 603.6 | 1774.8 | 2050.6 | 1407 | 1228.1 | 2962.2 | 1 | 1 | 0 | 0 | 0 | 0 | 0 | 0 |
| TR42531|c0_g1|m.11656 | Arabidopsis thaliana | AT4g32260/F10M6_100 | F10M6.100 | 8048.2 | 50.27 | 135.18 | 140.13 | 63.425 | 94.207 | 76.364 | 0 | 0 | 0 | 0 | 0 | 0 | 0 | 0 |
| TR42546|c0_g1|m.28488 | Vitis vinifera | Putative uncharacterized protein | VIT_17s0000g08000 | 6259.3 | 31.188 | 103.43 |  |  | 110.34 |  | 0 | 0 | -1 | 0 | 1 | 0 | 0 | 0 |
| TR42577|c0_g2|m.20004 | Ricinus communis | Putative uncharacterized protein | RCOM_1609670 | 1265.8 | 77.993 |  | 51.478 | 27.551 | 47.825 |  | 0 | 0 | 0 | 0 | 0 | 0 | 0 | 0 |
| TR42578|c0_g2|m.47497 | Vigna radiata | Beta-galactosidase |  | 3070.4 |  |  |  | 221.08 |  | 197.1 | 0 | 0 | 1 | 1 | 0 | 0 | 0 | 0 |
| TR45977|c0_g1|m.56762 | Suaeda salsa | Superoxide dismutase [Cu-Zn] | Cu/ZnSOD | 400280 | 12050 | 9625.4 | 7055.9 | 5475.6 | 6399.2 | 9376.2 | 0 | 0 | 0 | 0 | 0 | 0 | 0 | 0 |
| TR42584|c0_g2|m.5715 | Populus trichocarpa | Predicted protein | POPTRDRAFT_549183 | 109500 | 80.3 | 3.9893 | 137.63 | 111.92 | 700.7 | 348.3 | 1 | 1 | 0 | 0 | 0 | 0 | 0 | 0 |
| TR42604|c0_g1|m.4249 | Ricinus communis | Heat shock protein, putative | RCOM_1466370 | 1453.4 |  |  |  |  | 243.2 | 231.7 | 0 | 0 | 0 | 1 | 1 | 0 | 0 | 0 |
| TR42709|c0_g1|m.50738 | Ricinus communis | Argininosuccinate lyase, putative | RCOM_1039580 | 7262 | 113.55 | 140.69 | 96.646 | 93.072 | 478.29 | 255.44 | 0 | 0 | 0 | 0 | 0 | 0 | 0 | 0 |
| TR42730|c0_g2|m.44434 | Gossypium hirsutum | GSK1 | GSK1 | 20227 | 77.641 | 308.64 | 315.47 | 286.87 | 1250.8 | 648.97 | 1 | 1 | 0 | 0 | 0 | 0 | 0 | 0 |
| TR42734|c0_g1|m.48004 | Populus trichocarpa | Predicted protein | POPTRDRAFT_549183 | 19940 |  |  | 318.52 | 8.2526 | 160 |  | 1 | 1 | 1 | 1 | 0 | 0 | 0 | 0 |
| TR42735|c0_g1|m.8605 | Glycine max | Putative uncharacterized protein |  | 5756.6 | 12.091 | 73.384 |  |  | 439.64 | 56.4 | 0 | 0 | -1 | 0 | 1 | 0 | 0 | 0 |
| TR42747|c0_g1|m.1232 | Tamarix hispida | Heat shock protein Hsp18.3 | HSP18.3 | 1246.5 |  |  |  |  |  |  | 0 | 0 | 0 | 0 | 0 | 0 | 0 | 0 |
| TR45899|c1_g1|m.35872 | Vitis vinifera | Putative uncharacterized protein | VIT_18s0001g02560 | 10066 | 252.2 | 201.76 | 41.35 | 73.023 |  | 142.53 | 0 | 0 | -1 | 0 | 0 | -1 | 0 | 0 |
| TR51494|c0_g1|m.50252 | Nepenthes alata | Thaumatin like protein | NaTLP1a | 189.21 |  |  |  |  |  |  | 0 | 0 | 0 | 0 | 0 | 0 | 0 | 0 |
| TR67845|c0_g2|m.38138 | Camellia sinensis | Photosystem I reaction center subunit iv b (Fragment) |  | 4375.7 | 67.386 | 52.857 | 115.76 | 134.34 |  | 78.951 | 0 | 0 | 1 | 0 | 0 | 1 | 0 | 0 |
| TR68442|c0_g3|m.45913 | Vitis vinifera | Putative uncharacterized protein | VIT_12s0035g01150 | 228.8 |  |  |  |  |  |  | 0 | 0 | 0 | 0 | 0 | 0 | 0 | 0 |
| TR4382|c0_g1|m.48855 |  |  |  | 632.86 | 132.57 | 151.69 |  |  |  |  | 0 | 0 | -1 | -1 | 0 | 0 | 0 | 0 |
| TR48842|c0_g1|m.21125 | Vitis vinifera | Putative uncharacterized protein | VIT_10s0003g05630 | 10758 | 90.307 | 59.507 | 78.675 | 50.773 | 193.83 | 236.73 | 0 | 0 | 0 | 1 | 1 | 0 | 1 | 1 |
| TR43159|c0_g1|m.61408 | Picea sitchensis | Putative uncharacterized protein |  | 19979 | 346.84 | 198.9 | 34.068 | 128.5 | 561.98 | 431.83 | 0 | 0 | 0 | 0 | 1 | 0 | 0 | 1 |
| TR43169|c0_g1|m.56979 | Vitis vinifera | Putative uncharacterized protein | VIT_06s0004g06520 | 12952 | 302.58 | 581.69 | 291.88 | 197.29 | 154.61 | 154.36 | 0 | -1 | 0 | 0 | 0 | 0 | 0 | 0 |
| TR55060|c0_g6|m.20975 | Vitis vinifera | Putative uncharacterized protein | VIT_17s0119g00120 | 6886.8 |  |  |  |  |  | 20.364 | 0 | 0 | 0 | 1 | 1 | 0 | 0 | 0 |
| TR55085|c0_g1|m.5121 | Arabidopsis lyrata | Predicted protein | ARALYDRAFT_662389 | 56589 | 468.08 | 1064.4 | 154.38 | 148.62 | 481.85 |  | 0 | 0 | 0 | 0 | 1 | 0 | 0 | 1 |
| TR43266|c0_g1|m.13376 | Zea mays | 60S acidic ribosomal protein P1 |  | 311970 | 4116.2 | 711.41 | 498.58 | 869.06 | 16029 | 12247 | 0 | 0 | 0 | 1 | 1 | 0 | 1 | 1 |
| TR71711|c1_g4|m.48333 | Glycine max | Uncharacterized protein | Gma.12209 | 31864 |  | 425.62 | 69.526 |  |  | 2224.4 | 0 | 0 | 0 | 0 | 0 | 0 | 0 | 0 |
| TR4366|c0_g1|m.18542 | Vitis vinifera | Putative uncharacterized protein | VIT_19s0177g00340 | 4506.5 |  |  |  |  |  |  | 0 | 0 | 0 | 0 | 0 | 0 | 0 | 0 |
| TR43782|c0_g1|m.31081 | Vitis vinifera | Putative uncharacterized protein | VIT_01s0182g00070 | 2170.1 |  |  |  |  |  | 285.2 | 0 | 0 | 0 | 1 | 1 | 0 | 0 | 0 |
| TR4380|c0_g3|m.50157 | Ricinus communis | Minor allergen Alt a, putative | RCOM_0066700 | 32141 | 259.77 | 129.78 | 135.22 | 226.04 | 625.99 | 810.62 | 0 | 0 | 0 | 1 | 1 | 0 | 1 | 1 |
| TR43968|c0_g1|m.3543 | Vitis vinifera | Putative uncharacterized protein | VIT_11s0118g00620 | 4274.5 | 59.543 |  |  |  | 218 | 352.28 | 0 | 0 | -1 | 0 | 1 | 0 | 0 | 0 |
| TR44388|c1_g2|m.10446 | Vitis vinifera | Putative uncharacterized protein | VIT_17s0000g07330 | 85479 | 349.73 |  | 737.93 | 373.93 | 846.95 | 3771.4 | 1 | 1 | 0 | 0 | 0 | 0 | 0 | 0 |
| TR56299|c0_g1|m.56461 | Vitis vinifera | Putative uncharacterized protein | VIT_05s0094g00960 | 2235.6 | 64.004 | 37.114 |  | 23.243 | 39.374 | 51.118 | 0 | 0 | 0 | 0 | 0 | 0 | 0 | 0 |
| TR44624|c0_g1|m.24679 | Nicotiana tabacum | Glycerophosphodiesterase-like protein | NtGPDL | 3439.4 | 66.008 | 69.004 |  |  |  |  | 0 | 0 | -1 | -1 | 0 | 0 | 0 | 0 |
| TR5066|c0_g1|m.37444 | Ricinus communis | Alpha-galactosidase/alpha-n-acetylgalactosaminidase, putative | RCOM_1454590 | 6901.3 | 259.37 | 214.54 | 71.997 | 20.805 |  | 179.71 | 0 | 0 | -1 | 0 | 0 | -1 | 0 | 0 |
| TR44638|c0_g1|m.11877 | Salicornia europaea | V-type ATPase subunit A | VHA-A | 141050 | 2101.6 | 2513.8 | 1299.8 | 767.07 | 1612.8 | 2312.3 | 0 | 0 | 0 | 0 | 0 | 0 | 0 | 0 |
| TR44659|c0_g1|m.22123 | Vitis vinifera | Putative uncharacterized protein | VIT_07s0151g00210 | 1192.6 |  | 49.534 |  |  |  |  | 0 | 0 | -1 | -1 | 0 | 0 | 0 | 0 |
| TR44663|c0_g2|m.27336 | Silene latifolia | GAMMA carbonic anhydrase (Fragment) |  | 35711 | 160.66 | 385.41 | 370.11 | 228.3 | 712.49 | 608.36 | 1 | 1 | 0 | 0 | 0 | 0 | 0 | 0 |
| TR60092|c0_g1|m.24976 | Populus trichocarpa | Predicted protein (Fragment) | POPTRDRAFT_273494 | 4025.4 | 157.81 |  | 25.17 | 12.383 | 87.622 |  | 0 | 0 | 0 | 0 | 0 | 0 | 0 | 0 |
| TR44920|c0_g1|m.61897 | Phaseolus vulgaris | Ribosomal protein L19 |  | 20121 | 201.09 |  | 315.39 | 414.54 | 105.76 | 788.41 | 0 | 0 | 0 | 0 | 0 | 0 | 0 | 0 |
| TR5556|c0_g1|m.46853 | Vitis vinifera | Putative uncharacterized protein | VIT_00s0253g00140 | 9846.3 | 113.01 |  | 65.952 |  | 451.21 | 442.74 | 0 | 0 | 0 | 1 | 1 | 0 | 1 | 1 |
| TR44918|c0_g1|m.50499 | Vitis vinifera | Putative uncharacterized protein | VIT_07s0104g01360 | 105.14 |  |  | 16.203 |  |  |  | 0 | 0 | 1 | 0 | -1 | 0 | 0 | 0 |
| TR44939|c1_g8|m.47333 | Gossypium hirsutum | Elongation factor 1-alpha | EF1A4 | 42080 | 419.75 | 486.81 | 258.99 |  | 1452.9 | 1738.1 | 0 | 0 | 0 | 1 | 0 | 0 | 1 | 0 |
| TR44959|c0_g1|m.18849 | Glycine max | Uncharacterized protein |  | 3691.2 | 18.546 |  | 363.32 | 444.75 | 206.88 | 19.593 | 0 | 0 | 0 | 0 | 0 | 0 | 0 | 0 |
| TR44990|c0_g3|m.4196 | Populus trichocarpa | Putative uncharacterized protein |  | 594.23 | 92.91 | 34.678 | 32.615 | 42.247 |  |  | 0 | -1 | 0 | -1 | -1 | 0 | 0 | 0 |
| TR4502|c0_g1|m.21230 | Chenopodium album | Chloroplast low molecular weight heat shock protein HSP25.99n |  | 12041 | 33.068 | 6.1202 |  | 5.5082 |  | 8.7213 | 0 | 0 | 0 | 0 | 0 | 0 | 0 | 0 |
| TR47426|c0_g1|m.55271 | Musa acuminata | Protein phosphatase 2AB regulatory subunit-like protein (Fragment) | PPA2AB | 3118.6 |  |  |  |  | 1842.2 |  | 0 | 0 | 0 | 1 | 1 | 0 | 0 | 0 |
| TR45304|c0_g1|m.44569 | Populus trichocarpa | Predicted protein | POPTRDRAFT_724772 | 31916 | 98.656 | 87.836 | 92.036 | 50.761 | 1258.7 | 1096.3 | 0 | 0 | 0 | 1 | 1 | 0 | 1 | 1 |
| TR45512|c0_g1|m.26705 | Ricinus communis | Ferredoxin--NADP reductase | RCOM_1338000 | 170.35 |  |  |  |  |  |  | 0 | 0 | 0 | 0 | 0 | 0 | 0 | 0 |
| TR77865|c0_g2|m.16219 | Ricinus communis | 60S ribosomal protein L32, putative | RCOM_0379000 | 25915 | 290.59 | 423.51 | 358.3 | 33.917 | 835.84 | 952.93 | 0 | 0 | 0 | 1 | 0 | 0 | 1 | 0 |
| TR45523|c0_g1|m.51685 | Ricinus communis | Glycerophosphoryl diester phosphodiesterase, putative | RCOM_0046160 | 4013.8 |  |  | 33.214 |  |  |  | 0 | 0 | 1 | 0 | -1 | 0 | 0 | 0 |
| TR45621|c0_g2|m.41872 | Glycine max | Uncharacterized protein | Gma.40426 | 85337 |  | 1325.1 | 708.34 | 517.32 | 3090.3 | 542.79 | 0 | 0 | 0 | 0 | 0 | 0 | 0 | 0 |
| TR45890|c0_g3|m.18676 | Vitis vinifera | Putative uncharacterized protein | VIT_07s0005g06490 | 16230 | 70.364 | 72.044 | 267.11 | 240.48 | 617.03 | 316.06 | 1 | 1 | 1 | 0 | 0 | 1 | 0 | 0 |
| TR72222|c1_g1|m.32455 | Silene latifolia | Proton pump interactor (Fragment) |  | 3273.4 | 3.9939 | 25.447 | 12.74 | 24.635 | 28.622 | 73.007 | 1 | 1 | 0 | 0 | 0 | 0 | 0 | 0 |
| TR45901|c1_g2|m.36345 | Citrus sinensis | Peptidyl-prolyl cis-trans isomerase | CYP | 1208000 | 8476.4 | 10855 | 4338.5 | 5010.7 | 53593 | 31345 | 0 | 0 | 0 | 0 | 0 | 0 | 0 | 0 |
| TR70872|c0_g1|m.46804 | Arabidopsis lyrata | Elongation factor 1B alpha-subunit 2 | ARALYDRAFT_488844 | 50134 | 1148.8 | 846.87 | 1065 | 976.49 | 1236.4 | 1527.2 | 1 | 1 | 0 | 0 | 0 | 0 | 0 | 0 |
| TR45953|c1_g1|m.15412 | Populus trichocarpa | Predicted protein | POPTRDRAFT_804136 | 11190 | 110.49 | 76.909 | 556.52 | 100.26 |  |  | 0 | 0 | 0 | -1 | -1 | 0 | 0 | 0 |
| TR45956|c0_g3|m.2487 | Arabidopsis thaliana | At1g02300/T6A9_10 | At1g02305 | 22022 | 429.68 | 552.13 | 248.75 | 135.23 | 274.26 | 167.78 | 0 | 0 | 0 | 0 | 0 | 0 | 0 | 0 |
| TR70852|c0_g1|m.21938 | Vitis vinifera | Putative uncharacterized protein | VIT_06s0004g00040 | 6746.2 | 33.719 | 114.56 | 72.716 |  |  | 371.4 | 1 | 1 | 0 | 0 | 0 | 0 | 0 | 0 |
| TR45970|c0_g1|m.1386 | Glycine max | Uncharacterized protein | Gma.55044 | 57106 | 381.27 | 78.387 | 445.44 | 412.07 | 4162.6 | 3851.9 | 1 | 1 | 0 | 1 | 1 | 0 | 1 | 1 |
| TR45979|c0_g2|m.41955 | Ricinus communis | Ribonucleoprotein, chloroplast, putative | RCOM_1279020 | 6286.6 | 78.339 | 117.75 | 44.78 | 68.017 | 319.82 |  | 0 | 0 | 0 | 0 | 1 | 0 | 0 | 1 |
| TR46302|c0_g1|m.49052 | Populus trichocarpa | Predicted protein | POPTRDRAFT_814470 | 14180 |  | 132.82 |  | 215.28 |  |  | 0 | 0 | 0 | -1 | -1 | 0 | 0 | 0 |
| TR61961|c0_g1|m.60562 | Arabidopsis lyrata | Putative uncharacterized protein | ARALYDRAFT_488833 | 2485.6 | 48.178 |  |  | 35.862 |  | 205.71 | 0 | 0 | 0 | 0 | 0 | 0 | 0 | 0 |
| TR46378|c1_g1|m.38089 | Vitis vinifera | Putative uncharacterized protein | VIT_05s0077g00740 | 1734.1 |  |  |  |  | 328.1 |  | 0 | 0 | 0 | 1 | 1 | 0 | 0 | 0 |
| TR51512|c0_g1|m.60922 | Picea sitchensis | Putative uncharacterized protein |  | 16909 |  |  | 60.318 |  | 823.69 |  | 1 | 1 | 1 | 1 | 0 | 0 | 0 | 0 |
| TR93623|c1_g2|m.29814 | Vitis vinifera | Putative uncharacterized protein | VIT_08s0040g02670 | 16696 | 288.88 | 359.01 | 203.15 | 111.94 | 414.14 | 78.656 | 0 | 0 | 0 | 0 | 0 | 0 | 0 | 0 |
| TR70782|c0_g1|m.13110 | Picea sitchensis | Putative uncharacterized protein |  | 91780 | 166.33 | 149.5 |  | 51.443 | 3511.6 | 3422.4 | 0 | 0 | 0 | 1 | 1 | 0 | 1 | 1 |
| TR46496|c0_g2|m.58545 | Populus trichocarpa | Predicted protein (Fragment) | POPTRDRAFT_409886 | 6664.1 | 167.58 | 165.52 | 303.33 | 342.52 |  |  | 0 | 0 | 1 | -1 | -1 | 1 | 0 | 0 |
| TR53405|c0_g1|m.48738 | Vitis vinifera | Putative uncharacterized protein | VIT_07s0031g01740 | 86871 | 1054.2 | 1402.2 | 977.57 | 829.83 | 2532.1 | 2190.3 | 0 | 0 | 0 | 1 | 1 | 0 | 1 | 1 |
| TR72000|c0_g1|m.29625 | Glycine max | Uncharacterized protein |  | 2025.9 |  |  |  |  | 98.596 |  | 0 | 0 | 0 | 1 | 1 | 0 | 0 | 0 |
| TR46956|c0_g1|m.29169 | Populus trichocarpa | Predicted protein | POPTRDRAFT_815032 | 173.8 |  |  | 29.58 | 21.096 |  |  | 0 | 0 | 1 | 0 | -1 | 0 | 0 | 0 |
| TR47147|c1_g3|m.25452 | Vitis vinifera | Putative uncharacterized protein | VITISV_006466 | 1418.4 |  |  |  |  |  |  | 0 | 0 | 0 | 0 | 0 | 0 | 0 | 0 |
| TR95595|c1_g1|m.60702 | Malus domestica | Putative cinnamyl alcohol dehydrogenase | CAD | 934.16 |  |  |  | 24.357 |  |  | 0 | 0 | 1 | 0 | -1 | 0 | 0 | 0 |
| TR95595|c1_g2|m.19290 | Eucalyptus gunnii | Cinnamyl alcohol dehydrogenase | CAD1 | 14769 |  | 191.2 | 12.054 |  | 284.37 | 779.68 | 0 | 0 | 0 | 0 | 0 | 0 | 0 | 0 |
| TR47155|c2_g3|m.30768 | Mus musculus | cDNA sequence BC003883 | BC003883 | 487.29 |  |  |  |  |  |  | 0 | 0 | 0 | 0 | 0 | 0 | 0 | 0 |
| TR47166|c0_g11|m.51971 | Solanum lycopersicum | Peptidyl-prolyl cis-trans isomerase | CIP3 | 148100 | 1027.3 | 554.05 | 600.11 | 873.59 | 2951.3 | 4778.8 | 0 | 0 | 0 | 0 | 0 | 0 | 0 | 0 |
| TR7294|c1_g1|m.52970 | Vitis vinifera | UDP-glucose 6-dehydrogenase | VITISV_020300 | 816.15 |  |  | 29.577 |  |  |  | 0 | 0 | 1 | 0 | -1 | 0 | 0 | 0 |
| TR47179|c0_g2|m.23298 | Ricinus communis | Alcohol dehydrogenase, putative | RCOM_0996200 | 148320 | 1238.1 | 1168.8 | 2035.1 | 1336 | 3393.8 | 5102.7 | 1 | 1 | 0 | 0 | 0 | 0 | 0 | 0 |
| TR47188|c0_g2|m.9599 | Glycine max | Uncharacterized protein | Gma.55931 | 2345.5 | 195 |  |  |  | 671.58 |  | 0 | 0 | -1 | 0 | 1 | 0 | 0 | 0 |
| TR47191|c1_g1|m.50601 | Ricinus communis | Arginine/serine-rich splicing factor, putative | RCOM_1497410 | 2772.7 |  | 32.26 |  |  | 50.123 | 341.47 | 0 | 0 | -1 | 0 | 1 | 0 | 0 | 0 |
| TR47209|c2_g3|m.32337 | Neolamarckia cadamba | Xyloglucan endotransglycosylase/hydrolase 1 | XTH1 | 1140.1 |  |  |  |  |  | 47.846 | 0 | 0 | 0 | 1 | 1 | 0 | 0 | 0 |
| TR47224|c1_g1|m.27204 | Ricinus communis | Steroid binding protein, putative | RCOM_0892180 | 3336.5 |  |  |  |  |  |  | 0 | 0 | 0 | 0 | 0 | 0 | 0 | 0 |
| TR7119|c0_g5|m.24459 | Glycine max | Putative uncharacterized protein |  | 31637 | 155.05 | 128.7 | 197.87 | 264 | 1822.7 | 2271.4 | 1 | 1 | 0 | 1 | 1 | 0 | 1 | 1 |
| TR47897|c0_g3|m.34809 | Nicotiana tabacum | Putative red chlorophyll catabolite reductase |  | 52142 | 960.25 | 1040.4 | 765.4 | 525.75 | 1057.6 | 1196.3 | 0 | 0 | 0 | 0 | 0 | 0 | 0 | 0 |
| TR65725|c0_g3|m.45646 | Capsicum annuum | Eukaryotic initiation factor 5A2 | eIF5A2 | 3589.3 | 110.74 | 152.59 | 154.02 |  |  |  | 0 | 0 | 0 | -1 | -1 | 0 | 0 | 0 |
| TR64151|c0_g3|m.1141 | Silene latifolia | NADH dehydrogenase subunit 7 | nad7 | 62286 | 382.52 | 744.14 | 860.27 | 580.02 | 1658.9 | 1333.3 | 1 | 1 | 0 | 0 | 0 | 0 | 0 | 0 |
| TR47954|c0_g3|m.22573 | Arabidopsis lyrata | Putative uncharacterized protein | ARALYDRAFT_887465 | 3028.9 |  |  |  |  |  |  | 0 | 0 | 0 | 0 | 0 | 0 | 0 | 0 |
| TR47962|c1_g2|m.54618 | Vitis vinifera | Putative uncharacterized protein | VIT_18s0001g02510 | 42944 | 1491.2 | 1429.8 | 597.42 | 84.962 | 1287.4 | 1025.9 | 0 | 0 | -1 | 0 | 0 | -1 | 0 | 0 |
| TR48507|c0_g1|m.46020 | Medicago truncatula | Pyruvate decarboxylase | MTR_2g015560 | 23508 | 575.98 | 393.46 | 252.65 | 172.51 |  | 335.09 | 0 | 0 | 0 | 0 | 0 | 0 | 0 | 0 |
| TR61925|c0_g1|m.60975 | Ipomoea batatas | Peroxiredoxin |  | 76487 | 1174.1 | 1041.4 | 917.3 | 875.27 | 1017.9 | 1218.8 | 0 | 0 | 0 | 0 | 0 | 0 | 0 | 0 |
| TR48583|c1_g1|m.25469 |  |  |  | 3667 |  | 92.147 | 83.415 | 47.732 |  |  | 0 | -1 | 0 | -1 | -1 | 0 | 0 | 0 |
| TR48799|c0_g4|m.11836 | Vitis vinifera | Putative uncharacterized protein | VIT_08s0007g08490 | 2567.5 |  |  |  |  |  |  | 0 | 0 | 0 | 0 | 0 | 0 | 0 | 0 |
| TR48832|c0_g1|m.10769 | Vitis vinifera | Peptidyl-prolyl cis-trans isomerase | VIT_15s0021g01850 | 2097.2 |  | 37.374 |  |  |  | 75.448 | 0 | 0 | -1 | 0 | 1 | 0 | 0 | 0 |
| TR48844|c0_g1|m.16327 | Arabidopsis lyrata | Putative uncharacterized protein | ARALYDRAFT_483853 | 2917.7 | 118.96 |  |  |  | 285.75 |  | 0 | 0 | -1 | 0 | 1 | 0 | 0 | 0 |
| TR51439|c0_g2|m.8395 | Populus trichocarpa | Predicted protein | POPTRDRAFT_570599 | 2947.7 | 96.375 | 134.96 |  |  | 52.9 |  | 0 | 0 | -1 | 0 | 1 | 0 | 0 | 0 |
| TR657|c0_g2|m.53948 | Oryza sativa | Os02g0760500 protein | OJ1175_B01.17 | 3449.2 | 182.09 |  |  |  |  |  | 0 | 0 | -1 | -1 | 0 | 0 | 0 | 0 |
| TR65693|c0_g2|m.29473 | Vitis vinifera | Putative uncharacterized protein | VIT_11s0016g05580 | 1404.7 | 147.13 |  | 77.795 | 153.33 |  |  | 0 | -1 | 0 | -1 | -1 | 0 | 0 | 0 |
| TR49312|c7_g15|m.31102 |  |  |  | 6346.9 |  |  |  |  |  |  | 0 | 0 | 0 | 0 | 0 | 0 | 0 | 0 |
| TR49319|c0_g1|m.35915 | Medicago truncatula | GDSL esterase/lipase | MTR_1g025780 | 2079.4 |  | 63.229 | 12.543 |  |  |  | 0 | -1 | 0 | -1 | -1 | 0 | 0 | 0 |
| TR73717|c0_g1|m.6878 | Populus trichocarpa | 40S ribosomal protein S8 | POPTRDRAFT_743662 | 205900 | 1774.5 | 1187.3 | 2786.3 | 2184.3 | 4440.7 | 4231.4 | 1 | 1 | 0 | 1 | 1 | 0 | 1 | 1 |
| TR49331|c1_g2|m.50871 | Zea mays | 40S ribosomal protein S8 |  | 28799 | 243.25 | 274.17 | 252.28 | 280.98 | 537.1 | 510.64 | 1 | 1 | 0 | 1 | 1 | 0 | 1 | 1 |
| TR49350|c0_g5|m.1068 | Vitis vinifera | Putative uncharacterized protein | VIT_06s0080g00940 | 46114 | 383.73 | 788.19 | 416.5 | 352.74 | 1606.1 | 948.35 | 0 | 0 | 0 | 0 | 0 | 0 | 0 | 0 |
| TR49368|c0_g3|m.37311 | Vitis vinifera | Triosephosphate isomerase | VIT_13s0019g01090 | 15312 | 83.476 |  | 46.662 | 60.144 | 528.14 | 624.65 | 0 | 0 | 0 | 0 | 1 | 0 | 0 | 1 |
| TR93013|c0_g1|m.49547 | Glycine max | Uncharacterized protein |  | 34966 | 287.4 | 83.658 | 543.13 | 346.01 | 1392.3 | 795.3 | 1 | 1 | 0 | 0 | 0 | 0 | 0 | 0 |
| TR49544|c0_g1|m.3963 | Thellungiella halophila | mRNA, clone: RTFL01-34-J14 |  | 933.2 |  |  |  |  |  |  | 0 | 0 | 0 | 0 | 0 | 0 | 0 | 0 |
| TR86311|c0_g1|m.48089 | Ipomoea batatas | Putative L24 ribosomal protein |  | 25225 | 214.44 | 255.97 | 12.32 | 152.32 |  | 653.06 | 0 | 0 | 0 | 0 | 0 | 0 | 0 | 0 |
| TR49702|c0_g2|m.21043 | Vitis vinifera | Putative uncharacterized protein | VIT_13s0019g02350 | 8980.3 | 285.66 | 457.35 | 78.334 | 71.738 | 70.885 | 160.59 | 0 | 0 | 0 | 0 | 0 | 0 | 0 | 0 |
| TR49703|c0_g1|m.30162 | Populus trichocarpa | Predicted protein (Fragment) | POPTRDRAFT_176324 | 13085 | 67.291 | 158.97 | 30.028 | 107.06 | 317.69 | 356.2 | 0 | 0 | 0 | 1 | 1 | 0 | 1 | 1 |
| TR49710|c0_g1|m.5148 | Populus trichocarpa | Predicted protein | POPTRDRAFT_736805 | 14163 | 139.99 | 176.76 | 62.471 | 51.785 |  |  | 0 | -1 | -1 | -1 | -1 | -1 | 0 | 0 |
| TR49727|c0_g5|m.2793 | Ricinus communis | Rubisco subunit binding-protein beta subunit, rubb, putative | RCOM_0342910 | 37007 | 307.94 | 16.097 | 212.42 | 11.789 | 867.59 | 925.27 | 0 | 0 | 0 | 1 | 1 | 0 | 1 | 1 |
| TR49739|c0_g4|m.57796 | Populus trichocarpa | Predicted protein | POPTRDRAFT_825512 | 19726 | 229.65 | 322.8 | 45.717 | 34.256 | 574.85 | 174.02 | 0 | 0 | -1 | 0 | 0 | -1 | 0 | 0 |
| TR57222|c0_g5|m.9903 | Glycine max | Uncharacterized protein | Gma.4331 | 97349 | 592.34 | 843.29 | 976.06 | 584.22 | 3877.3 | 3193 | 1 | 1 | 0 | 1 | 1 | 0 | 1 | 1 |
| TR85493|c0_g1|m.50915 | Beta vulgaris | Proteasome subunit alpha type | PAC1 | 52611 | 522.21 | 575.19 | 492.66 | 383.49 | 1552.2 | 1455.3 | 0 | 0 | 0 | 1 | 1 | 0 | 1 | 1 |
| TR49997|c0_g2|m.16602 | Arabidopsis lyrata | Putative uncharacterized protein | ARALYDRAFT_496774 | 304.74 |  |  |  |  |  |  | 0 | 0 | 0 | 0 | 0 | 0 | 0 | 0 |
| TR50148|c0_g1|m.10165 | Cucumis melo | Polygalacturonase-inhibiting protein |  | 2281.1 |  |  |  |  |  |  | 0 | 0 | 0 | 0 | 0 | 0 | 0 | 0 |
| TR60694|c0_g1|m.32656 | Populus trichocarpa | Putative uncharacterized protein |  | 37960 | 422.02 | 402.61 | 1289.7 | 808.24 | 674.34 | 357.82 | 0 | 0 | 0 | 0 | 0 | 0 | 0 | 0 |
| TR50158|c0_g1|m.59199 | Populus tremuloides | Serine hydroxymethyltransferase | SHMT1 | 19634 | 105.26 | 215.72 | 15.875 | 22.3 | 1263.3 | 1239.5 | 0 | 0 | 0 | 1 | 1 | 0 | 1 | 1 |
| TR59604|c0_g1|m.4556 | Vitis vinifera | Putative uncharacterized protein | VIT_04s0008g03010 | 27123 | 212.78 | 496.05 | 312.42 | 212.64 | 921.42 | 721.87 | 0 | 0 | 0 | 0 | 1 | 0 | 0 | 1 |
| TR50168|c0_g10|m.41567 | Dianthus caryophyllus | Non-specific lipid-transfer protein | DcLTP1 | 69171 | 4454.7 | 4458.7 | 295.42 | 62.979 | 1465.4 | 1506.4 | 0 | 0 | -1 | -1 | 1 | -1 | -1 | 1 |
| TR50174|c0_g4|m.18852 | Populus trichocarpa | Predicted protein | POPTRDRAFT_712455 | 6070.2 |  |  | 91.494 | 119.77 | 257.39 | 371.98 | 1 | 1 | 1 | 1 | 0 | 0 | 0 | 0 |
| TR50202|c0_g1|m.34825 | Citrus paradisi | Ccr protein |  | 63.15 |  |  |  |  |  |  | 0 | 0 | 0 | 0 | 0 | 0 | 0 | 0 |
| TR50204|c0_g2|m.43086 | Populus trichocarpa | Porin/voltage-dependent anion-selective channel protein | POPTRDRAFT_580465 | 22508 | 350.13 | 381.21 | 258.94 | 335.31 | 152.06 | 265.18 | 0 | -1 | 0 | 0 | 0 | 0 | 0 | 0 |
| TR50228|c0_g3|m.37857 | Medicago truncatula | Uncharacterized protein |  | 95140 | 572.62 | 1435.4 | 537.17 | 252.2 | 2571.1 | 4266.2 | 0 | 0 | 0 | 0 | 0 | 0 | 0 | 0 |
| TR50234|c0_g1|m.6765 | Beta vulgaris | Glucan endo-1,3-beta-D-glucosidase (Precursor) | Glu2 | 3440.7 |  |  |  | 149.46 |  |  | 0 | 0 | 1 | 0 | -1 | 0 | 0 | 0 |
| TR50234|c0_g4|m.32973 | Beta vulgaris | Glucan endo-1,3-beta-D-glucosidase (Precursor) | Glu2 | 4422.1 | 33.626 |  |  |  |  | 149.12 | 0 | 0 | -1 | 0 | 1 | 0 | 0 | 0 |
| TR50262|c0_g1|m.23431 | Citrus sinensis | Short chain alcohol dehydrogenase | ABA2 | 9970.6 |  | 18.033 | 62.995 | 43.657 |  | 320.12 | 1 | 1 | 0 | 0 | 1 | 0 | 0 | 1 |
| TR64744|c0_g1|m.61385 | Glycine max | Putative ribosomal protein S15 | Gma.56889 | 24099 | 431.56 | 723.22 | 473.36 | 371.04 | 940.67 | 582.26 | 0 | 0 | 0 | 0 | 0 | 0 | 0 | 0 |
| TR50410|c1_g2|m.38570 | Vitis vinifera | Putative uncharacterized protein | VIT_11s0065g00030 | 782.77 |  |  |  |  |  |  | 0 | 0 | 0 | 0 | 0 | 0 | 0 | 0 |
| TR5042|c0_g1|m.9753 | Nicotiana tabacum | NTGP1 |  | 266.2 |  |  |  |  |  | 109.17 | 0 | 0 | 0 | 1 | 1 | 0 | 0 | 0 |
| TR50452|c0_g1|m.40752 | Ricinus communis | Periplasmic beta-glucosidase, putative | RCOM_1034300 | 991.52 | 27.908 |  |  |  |  |  | 0 | 0 | -1 | -1 | 0 | 0 | 0 | 0 |
| TR59683|c0_g1|m.41425 | Populus trichocarpa | Putative uncharacterized protein |  | 33870 | 265.17 | 255.41 | 39.586 |  | 1155.8 | 1327.9 | 0 | 0 | -1 | 1 | 0 | -1 | 1 | 0 |
| TR5858|c0_g2|m.58341 | Vitis vinifera | Putative uncharacterized protein | VIT_06s0004g05430 | 611.81 |  |  | 113.57 |  |  |  | 0 | 0 | 1 | 0 | -1 | 0 | 0 | 0 |
| TR77902|c0_g2|m.48609 | Vitis vinifera | Putative uncharacterized protein | VIT_09s0002g06000 | 571.39 |  |  |  |  |  |  | 0 | 0 | 0 | 0 | 0 | 0 | 0 | 0 |
| TR51099|c0_g1|m.20145 | Vitis vinifera | Putative uncharacterized protein | VIT_11s0016g04290 | 1144.9 |  | 24.05 |  |  |  |  | 0 | 0 | -1 | -1 | 0 | 0 | 0 | 0 |
| TR51124|c0_g1|m.63209 | Cucumis melo | 40S ribosomal protein S24 |  | 79074 | 746.62 | 861.71 | 909.8 | 918.02 | 3239 | 2839.1 | 1 | 1 | 0 | 1 | 1 | 0 | 1 | 1 |
| TR51262|c0_g1|m.51115 | Mesembryanthemum crystallinum | Fructose-bisphosphate aldolase |  | 648.12 |  | 54.626 |  |  |  |  | 0 | 0 | -1 | -1 | 0 | 0 | 0 | 0 |
| TR72591|c0_g3|m.62000 | Oryza sativa | Putative hypersensitive-induced response protein | P0711F01.54 | 10911 | 130.51 | 174.08 | 34.01 | 42.438 | 429 | 337.91 | 0 | 0 | -1 | 1 | 1 | -1 | 1 | 1 |
| TR5139|c0_g1|m.57708 | Cinnamomum osmophloeum | UDP-glucose 6-dehydrogenase | UDPGDH | 529.73 |  |  | 92.893 | 92.404 |  |  | 0 | 0 | 1 | 0 | -1 | 0 | 0 | 0 |
| TR51433|c0_g1|m.10890 | Glycine max | Uncharacterized protein |  | 9379.3 |  |  | 51.18 | 43.212 |  | 340.24 | 1 | 1 | 1 | 1 | 1 | 0 | 0 | 1 |
| TR51437|c0_g2|m.3827 | Ricinus communis | Nuclear transport factor, putative | RCOM_1079720 | 19311 | 138.73 | 100.32 | 127.19 | 23.446 | 1035.7 | 227.51 | 0 | 0 | 0 | 0 | 0 | 0 | 0 | 0 |
| TR51454|c0_g1|m.26280 | Glycine max | Uncharacterized protein | Gma.5910 | 980.43 | 23.676 |  |  | 18.149 |  |  | 0 | -1 | 0 | -1 | -1 | 0 | 0 | 0 |
| TR74974|c0_g1|m.16443 | Populus trichocarpa | Predicted protein | POPTRDRAFT_754616 | 10336 | 323.59 |  |  |  | 775.1 | 669.97 | 0 | 0 | -1 | 0 | 1 | 0 | 0 | 0 |
| TR51496|c0_g1|m.47268 | Vitis vinifera | Putative uncharacterized protein | VIT_08s0007g01570 | 39687 | 399.71 | 212.46 | 410.92 | 379.6 | 541.57 | 293.11 | 1 | 1 | 0 | 0 | 0 | 0 | 0 | 0 |
| TR51504|c0_g1|m.39996 | Vitis vinifera | Putative uncharacterized protein | VIT_15s0048g01290 | 2588.9 |  | 116.51 | 71.173 |  | 118.43 |  | 0 | 0 | 0 | 0 | 0 | 0 | 0 | 0 |
| TR51508|c0_g1|m.33300 | Glycine max | Uncharacterized protein | Gma.30782 | 61063 | 105.55 | 142.31 | 377.35 | 213.3 | 1637.7 | 211.51 | 1 | 1 | 0 | 0 | 0 | 0 | 0 | 0 |
| TR63179|c1_g1|m.51397 | Vitis vinifera | Putative uncharacterized protein | VIT_10s0003g03300 | 4332.7 | 273.04 | 88.983 | 97.066 | 86.587 |  |  | 0 | -1 | 0 | -1 | -1 | 0 | 0 | 0 |
| TR51536|c0_g1|m.41913 | Vitis vinifera | Putative uncharacterized protein | VIT_10s0092g00120 | 6148.1 | 39.14 | 32.72 | 44.672 |  |  | 624.94 | 1 | 1 | 0 | 1 | 0 | 0 | 1 | 0 |
| TR51550|c0_g1|m.4385 | Vitis vinifera | Putative uncharacterized protein | VIT_07s0151g00210 | 9424.9 | 53.853 | 12.278 | 183 | 88.042 | 191.69 | 57.143 | 0 | 0 | 0 | 0 | 0 | 0 | 0 | 0 |
| TR51565|c0_g1|m.58725 | Ammopiptanthus mongolicus | Translation elongation factor |  | 173180 | 3033.7 | 2263.8 | 1820.4 | 1682.1 | 5955.2 | 2998.4 | 0 | 0 | 0 | 0 | 0 | 0 | 0 | 0 |
| TR7776|c0_g1|m.6623 | Medicago truncatula | Peroxidase | MTR_4g030890 | 28748 | 131.97 | 164.59 | 138.7 | 95.672 | 1060.4 | 205.07 | 0 | 0 | 0 | 0 | 0 | 0 | 0 | 0 |
| TR65735|c0_g2|m.12291 | Vitis vinifera | Putative uncharacterized protein | VITISV_031115 | 3517.6 | 131.72 | 76.783 | 108.84 | 57.158 | 90.839 | 66.81 | 0 | -1 | 0 | 0 | 0 | 0 | 0 | 0 |
| TR51988|c0_g2|m.50548 | Glycine max | Uncharacterized protein | Gma.20493 | 4401.4 | 57.916 | 53.994 |  | 16.049 | 321.88 | 283.57 | 0 | 0 | 0 | 1 | 0 | 0 | 1 | 0 |
| TR51989|c0_g1|m.12228 | Cucumis melo | 40S ribosomal protein S24 |  | 14485 | 86.294 |  | 265.6 | 262.11 |  | 456.98 | 1 | 1 | 1 | 0 | 1 | 1 | 0 | 1 |
| TR59051|c0_g2|m.27981 | Ricinus communis | Heat shock protein, putative | RCOM_1442270 | 807.79 |  |  |  |  |  |  | 0 | 0 | 0 | 0 | 0 | 0 | 0 | 0 |
| TR53333|c0_g2|m.36362 | Glycine max | Uncharacterized protein | Gma.2634 | 43778 | 77.481 |  | 172.45 | 72.272 | 2205.1 | 2584.4 | 1 | 1 | 0 | 0 | 1 | 0 | 0 | 1 |
| TR53365|c0_g1|m.20192 | Ricinus communis | Putative uncharacterized protein | RCOM_1597100 | 1199.1 |  |  |  | 88.096 |  |  | 0 | 0 | 1 | 0 | -1 | 0 | 0 | 0 |
| TR53378|c0_g1|m.10983 | Chenopodium rubrum | Sucrose synthase | CSS1 | 25054 | 139.44 | 200.95 |  |  | 4796.8 | 3356.6 | 0 | 0 | -1 | 1 | 1 | 0 | 1 | 0 |
| TR53429|c0_g1|m.53962 | Ricinus communis | Annexin | RCOM_1453030 | 10998 | 145.17 | 160.56 | 193.54 | 126.21 | 178.53 | 377.38 | 1 | 1 | 0 | 0 | 0 | 0 | 0 | 0 |
| TR53448|c0_g1|m.11035 | Ricinus communis | Porphobilinogen deaminase, putative | RCOM_1534040 | 1591.6 |  | 101.97 |  | 16.009 |  |  | 0 | -1 | 0 | -1 | -1 | 0 | 0 | 0 |
| TR7784|c0_g1|m.5015 | Beta vulgaris | Oxalate oxidase-like germin 165 | Ger165 | 159100 | 1552.1 | 1969.1 | 1139.6 | 861.21 | 2641.9 | 2660.2 | 0 | 0 | 0 | 0 | 1 | 0 | 0 | 1 |
| TR53695|c0_g3|m.5852 | Vitis vinifera | Putative uncharacterized protein | VIT_17s0000g00160 | 653.97 |  | 48.402 |  |  |  |  | 0 | 0 | -1 | -1 | 0 | 0 | 0 | 0 |
| TR9571|c0_g3|m.1969 | Populus trichocarpa | Predicted protein | POPTRDRAFT_648993 | 105900 | 1828.9 | 1950.8 | 1467.4 | 591.48 | 2299.6 | 2314.1 | 0 | 0 | 0 | 0 | 0 | 0 | 0 | 0 |
| TR53959|c0_g2|m.12368 | Oryza sativa | Putative phosphoenolpyruvate carboxylase | OSJNBa0057D11.22 | 154350 | 1301.2 | 1514.3 | 938.79 | 552.91 | 6712.7 | 269.2 | 0 | 0 | 0 | 0 | 0 | 0 | 0 | 0 |
| TR53973|c0_g1|m.12117 | Ricinus communis | Argininosuccinate synthase, putative | RCOM_0887890 | 3915.7 | 23.341 |  | 68.404 |  |  |  | 0 | 0 | 0 | -1 | -1 | 0 | 0 | 0 |
| TR54015|c0_g2|m.62153 | Arabidopsis lyrata | Eukaryotic translation initiation factor 6 3 | EIF6-3 | 1190.7 |  |  |  |  |  | 601.34 | 0 | 0 | 0 | 1 | 1 | 0 | 0 | 0 |
| TR5496|c0_g1|m.55051 | Populus trichocarpa | S-adenosylmethionine synthetase 6 | AdoMet6 | 2322 |  |  |  |  |  |  | 0 | 0 | 0 | 0 | 0 | 0 | 0 | 0 |
| TR54989|c0_g4|m.14816 | Citrus sinensis | Temperature-induced lipocalin | TIL | 100310 | 3739.6 | 4096.4 | 1783.5 | 1147.7 | 1082.1 | 651.92 | 0 | -1 | -1 | -1 | 0 | -1 | -1 | 0 |
| TR71717|c0_g1|m.45484 | Glycine max | Uncharacterized protein |  | 36584 | 142.58 | 166.17 | 442.82 | 321.56 | 1476.2 | 1571.9 | 1 | 1 | 0 | 1 | 1 | 0 | 1 | 1 |
| TR60329|c0_g1|m.23286 | Ricinus communis | HSP90 co-chaperone, putative | RCOM_0622500 | 13174 | 163.08 | 349.91 | 122.76 | 81.272 |  |  | 0 | -1 | 0 | -1 | -1 | 0 | 0 | 0 |
| TR55060|c0_g2|m.42514 | Vitis vinifera | Putative uncharacterized protein | VIT_17s0119g00120 | 5706.7 |  |  |  |  |  |  | 0 | 0 | 0 | 0 | 0 | 0 | 0 | 0 |
| TR55062|c0_g1|m.26266 | Populus trichocarpa | Proteasome subunit alpha type | POPTRDRAFT_548687 | 20278 | 235.32 | 254.89 | 330.66 | 530.23 | 434.51 | 280.91 | 0 | 0 | 0 | 0 | 0 | 0 | 0 | 0 |
| TR55078|c0_g2|m.59691 | Vitis vinifera | Putative uncharacterized protein | VIT_17s0000g09620 | 2046.5 |  |  |  |  |  |  | 0 | 0 | 0 | 0 | 0 | 0 | 0 | 0 |
| TR55111|c0_g2|m.39338 | Vitis vinifera | Putative uncharacterized protein | VITISV_017610 | 5670.7 |  |  | 324.54 |  |  |  | 0 | 0 | 1 | 0 | -1 | 0 | 0 | 0 |
| TR55159|c0_g2|m.3442 | Glycine max | Uncharacterized protein |  | 896.92 |  | 47.095 | 205.01 | 338.27 |  |  | 0 | 0 | 0 | -1 | -1 | 0 | 0 | 0 |
| TR6171|c0_g1|m.3096 | Helianthus annuus | Putative alpha-soluble NSF attachment protein |  | 6334.5 |  |  | 131.08 | 65.732 |  | 1184.8 | 1 | 1 | 1 | 1 | 1 | 0 | 0 | 1 |
| TR55851|c0_g1|m.53558 | Vitis vinifera | Putative uncharacterized protein | VIT_01s0026g01610 | 403.09 |  |  |  |  | 64.445 | 63.371 | 0 | 0 | 0 | 1 | 1 | 0 | 0 | 0 |
| TR55900|c0_g1|m.41117 | Tamarix hispida | Peroxiredoxin 2 | Prx2 | 6463.1 |  | 37.808 |  |  | 324.7 | 223.28 | 0 | 0 | -1 | 0 | 1 | 0 | 0 | 0 |
| TR5595|c0_g1|m.59378 | Arabidopsis lyrata | Predicted protein | ARALYDRAFT_677371 | 6475.3 | 96.304 | 126.88 |  |  | 297.13 | 312.02 | 0 | 0 | -1 | 1 | 1 | 0 | 1 | 0 |
| TR55964|c0_g1|m.59696 | Populus trichocarpa x Populus deltoides | Putative uncharacterized protein |  | 109250 | 1338 | 1987.8 | 695.83 | 109.52 | 420.47 | 3506.8 | 0 | 0 | 0 | 0 | 0 | 0 | 0 | 0 |
| TR56113|c0_g1|m.10989 | Vitis vinifera | Putative uncharacterized protein | VIT_19s0140g00210 | 68916 | 373.33 | 136.42 | 150.8 | 133.78 | 3510.6 | 3602.8 | 0 | 0 | 0 | 1 | 1 | 0 | 1 | 1 |
| TR56133|c0_g2|m.33440 | Ricinus communis | DNA-damage-repair/toleration protein DRT102, putative | RCOM_1428060 | 6145 | 116.8 | 130.47 | 134.27 | 135.62 | 112.11 |  | 0 | 0 | 0 | 0 | 0 | 0 | 0 | 0 |
| TR85361|c0_g1|m.45444 | Vitis vinifera | Putative uncharacterized protein | VIT_07s0005g00070 | 12722 | 186.67 | 169.73 | 132.44 | 168.68 | 105.97 | 57.79 | 0 | -1 | 0 | 0 | 0 | 0 | 0 | 0 |
| TR56170|c0_g1|m.38385 | Vitis vinifera | Putative uncharacterized protein | VIT_06s0004g05920 | 4419 | 121.53 |  |  |  | 191.81 | 41.752 | 0 | 0 | -1 | 0 | 1 | 0 | 0 | 0 |
| TR56181|c1_g11|m.29098 | Camellia sinensis | Vacuolar ATP synthase subunit |  | 645370 | 7232.6 | 9554.9 | 4175.1 | 3826.7 | 14316 | 13358 | 0 | 0 | 0 | 1 | 1 | 0 | 1 | 1 |
| TR60692|c0_g1|m.29336 | Solanum tuberosum | Pom14 protein | pom14 | 29031 | 489.49 | 443.86 | 146.67 |  | 356.62 | 495.47 | 0 | 0 | 0 | 0 | 0 | 0 | 0 | 0 |
| TR56197|c0_g1|m.45594 | Lotus japonicus | Uncharacterized protein |  | 4376 | 124 |  | 64.42 | 32.615 |  |  | 0 | -1 | 0 | -1 | -1 | 0 | 0 | 0 |
| TR66268|c0_g1|m.59518 | Populus trichocarpa | Serine hydroxymethyltransferase 1 | SHMT1 | 7317 |  | 102.72 | 107.66 | 79.785 |  | 419.27 | 0 | 0 | 0 | 0 | 1 | 0 | 0 | 1 |
| TR56690|c0_g1|m.59937 | Vitis vinifera | Putative uncharacterized protein | VIT_19s0177g00320 | 17842 | 397.64 | 532.96 | 591.21 | 331.57 | 68.895 |  | 0 | -1 | 0 | 0 | 0 | 0 | 0 | 0 |
| TR56714|c0_g1|m.44243 | Solanum pennellii | Methyl-6-phytyl-1,4-benzoquinone methyltransferase 2 |  | 7072.9 | 221.77 | 120.77 | 141.44 | 44.469 | 127.8 |  | 0 | 0 | 0 | 0 | 0 | 0 | 0 | 0 |
| TR56722|c0_g1|m.34108 | Populus trichocarpa | Predicted protein | POPTRDRAFT_581084 | 856.04 |  | 66.672 |  |  |  |  | 0 | 0 | -1 | -1 | 0 | 0 | 0 | 0 |
[truncated: 508,929 more chars]
